# Supplementary material for: Tryptophan extends the life of cytochrome P450
Source: PubMed Central journal article supplement — Proc Natl Acad Sci U S A. 2023 Dec 7;120(50):e2317372120. doi: 10.1073/pnas.2317372120 (PMC10722969; doi:10.1073/pnas.2317372120), 2023-12-07
Supplement: pnas.2317372120.sd01.pdf [file pnas.2317372120.sd01.pdf]

245 CYP102 Sequences aligned using Clustal omega (<https://www.ebi.ac.uk/Tools/msa/clustalo/>)

IDs are as follows:

sp|P14779.2|CPXB\_PRIM2 *Priestia megaterium* NBRC 15308 = ATCC 14581  
ADF40088.1 Riboflavin synthase/Ferredoxin reductase FAD binding domain protein [*Priestia megaterium* DSM 319]  
ADE70259.1 Riboflavin synthase/Ferredoxin reductase FAD binding domain protein [*Priestia megaterium* QM B1551]  
AEN88827.1 NADPH--cytochrome P450 reductase [*Priestia megaterium* WSH-002]  
KFN05180.1 bifunctional reductase [*Priestia megaterium*] strain BMS  
ACZ37122.1 cytochrome P450:NADPH P450 reductase [*Priestia megaterium*] Strain KCTC 2194  
ADA57055.1 NADPH-cytochrome P450 reductase 102A1V2 [*Priestia megaterium*] Strain KCTC 3712  
ADA57058.1 NADPH-cytochrome P450 reductase 102A1V7 [*Priestia megaterium*] Strain KCCM 11776  
ADA57059.1 NADPH-cytochrome P450 reductase 102A1V3 [*Priestia megaterium*] Strain KCCM 12503  
ADA57061.1 NADPH-cytochrome P450 reductase 102A1V8 [*Priestia megaterium*] Strain ATCC 14945  
ADA57062.1 NADPH-cytochrome P450 reductase 102A1V4 [*Priestia megaterium*] Strain ATCC 15451  
ADA57068.1 NADPH-cytochrome P450 reductase 102A1V10 [*Priestia megaterium*] Strain ATCC 19213  
AAT62301.1 NADPH-cytochrome P450 reductase [[*Bacillus thuringiensis*] serovar konkukian str. 97-27]  
AAM54108.1 cytochrome P450 [*Actinosynnema pretiosum* subsp. auranticum]  
EFQ83738.1 unspecific monooxygenase [*Aeromicrobium marinum* DSM 15272]  
EFL88452.1 bifunctional P-450:nadph-p450 reductase [*Ahrensia* sp. R2A130]  
BAF89518.1 FAD-binding oxidoreductase [*Azorhizobium caulinodans* ORS 571]  
CBI43648.1 cytochrome P450 CYP102A3 [*Bacillus amyloliquefaciens* DSM 7]  
AEB22839.1 cytochrome P450 CYP102A2 [*Bacillus amyloliquefaciens* TA208]  
EDT22025.1 bifunctional P-450:NADPH-P450 reductase 1 [*Bacillus anthracis* str. A0465]  
AFH84458.1 NADPH-cytochrome P450 reductase [*Bacillus anthracis* str. H9401]  
ADP31197.1 putative bifunctional P-450/NADPH-P450 reductase 1 [*Bacillus atrophaeus* 1942]  
ACP19384.1 NADPH-cytochrome reductase [*Bacillus cereus*] Strain BC002  
ADL27534.1 bifunctional CYP450 monooxygenase CYP102A5, partial [*Bacillus cereus*] Strain CYPPB-1  
ACO29732.1 bifunctional P-450:NADPH-P450 reductase 1 [*Bacillus cereus* 03BB102]  
EDX65100.1 bifunctional P-450:NADPH-P450 reductase 1 [*Bacillus cereus* 03BB108]  
EEK61456.1 NADPH--cytochrome P450 reductase [*Bacillus cereus* 172560W]  
EEL16232.1 NADPH--cytochrome P450 reductase [*Bacillus cereus* 95/8201]  
EDZ53094.1 bifunctional P-450:NADPH-P450 reductase 1 [*Bacillus cereus* AH1134]  
EEL81346.1 NADPH--cytochrome P450 reductase [*Bacillus cereus* AH1271]  
EEL87105.1 NADPH--cytochrome P450 reductase [*Bacillus cereus* AH1272]  
EEL75761.1 NADPH--cytochrome P450 reductase [*Bacillus cereus* AH676]  
ACK88541.1 bifunctional P-450:NADPH-P450 reductase 1 [*Bacillus cereus* AH820]

EJQ05303.1 hypothetical protein IC5\_02130 [Bacillus cereus AND1407]  
EEK50040.1 NADPH--cytochrome P450 reductase [Bacillus cereus ATCC 10876]  
AAS42149.1 bifunctional P-450:NADPH-P450 reductase 1 [Bacillus cereus ATCC 10987]  
AAP10153.1 NADPH-cytochrome P450 reductase [Bacillus cereus ATCC 14579]  
EEK83466.1 NADPH--cytochrome P450 reductase [Bacillus cereus ATCC 4342]  
ACK63698.1 bifunctional P-450:NADPH-P450 reductase 1 [Bacillus cereus B4264]  
EJS57156.1 hypothetical protein ICE\_02493 [Bacillus cereus BAG1X1-2]  
EJS56605.1 hypothetical protein ICG\_02407 [Bacillus cereus BAG1X1-3]  
EJS68951.1 hypothetical protein ICU\_02504 [Bacillus cereus BAG2X1-1]  
EJQ10567.1 hypothetical protein IE1\_02325 [Bacillus cereus BAG30-2]  
EJQ13433.1 hypothetical protein IE3\_02332 [Bacillus cereus BAG3X2-1]  
EJQ20399.1 hypothetical protein IE5\_02995 [Bacillus cereus BAG3X2-2]  
EJQ30236.1 hypothetical protein IE9\_02894 [Bacillus cereus BAG4X12-1]  
EJQ51278.1 hypothetical protein IEQ\_02218 [Bacillus cereus BAG6X1-2]  
EEL10858.1 NADPH--cytochrome P450 reductase [Bacillus cereus BDRD-Cer4]  
EEL05393.1 NADPH--cytochrome P450 reductase [Bacillus cereus BDRD-ST196]  
EEK94080.1 NADPH--cytochrome P450 reductase [Bacillus cereus BDRD-ST24]  
EEK99882.1 NADPH--cytochrome P450 reductase [Bacillus cereus BDRD-ST26]  
EEK55784.1 NADPH--cytochrome P450 reductase [Bacillus cereus BGSC 6E1]  
ADK05784.1 NADPH-cytochrome P450 reductase [Bacillus cereus biovar anthracis str. CI]  
AAU17340.1 NADPH-cytochrome P450 reductase [Bacillus cereus E33L]  
EEL64394.1 NADPH--cytochrome P450 reductase [Bacillus cereus F65185]  
AEW56259.1 bifunctional P-450:NADPH-P450 reductase 1 [Bacillus cereus F837/76]  
AFQ11690.1 bifunctional P-450:NADPH-P450 reductase 1 [Bacillus cereus FRI-35]  
EAL16831.1 NADPH-cytochrome P450 reductase [Bacillus cereus G9241]  
ACK94296.1 bifunctional P-450:NADPH-P450 reductase 1 [Bacillus cereus G9842]  
EDZ58760.1 bifunctional P-450:NADPH-P450 reductase 1 [Bacillus cereus H3081.97]  
EJV84218.1 hypothetical protein IG3\_02639 [Bacillus cereus HuA2-1]  
EJQ69212.1 hypothetical protein IG7\_02949 [Bacillus cereus HuA2-4]  
EJQ80339.1 hypothetical protein IGC\_02351 [Bacillus cereus HuA4-10]  
EJV81602.1 hypothetical protein IGE\_02451 [Bacillus cereus HuB1-1]  
EJQ95474.1 hypothetical protein IGW\_01704 [Bacillus cereus ISP3191]  
EEK44229.1 NADPH--cytochrome P450 reductase [Bacillus cereus m1293]  
EEK88560.1 NADPH--cytochrome P450 reductase [Bacillus cereus m1550]  
EJR07451.1 hypothetical protein II5\_01805 [Bacillus cereus MSX-A1]  
EJR16542.1 hypothetical protein II9\_02398 [Bacillus cereus MSX-D12]  
BAL18840.1 bifunctional P-450:NADPH-P450 reductase 1 [Bacillus cereus NC7401]  
EDX69960.1 bifunctional P-450:NADPH-P450 reductase 1 [Bacillus cereus NVH0597-99]

ACM13462.1 bifunctional P-450:NADPH-P450 reductase 1 [Bacillus cereus Q1]  
EEK75631.1 NADPH--cytochrome P450 reductase [Bacillus cereus R309803]  
EEL25491.1 NADPH--cytochrome P450 reductase [Bacillus cereus Rock1-15]  
EEL21990.1 NADPH--cytochrome P450 reductase [Bacillus cereus Rock1-3]  
EEL33825.1 NADPH--cytochrome P450 reductase [Bacillus cereus Rock3-28]  
EEL44933.1 NADPH--cytochrome P450 reductase [Bacillus cereus Rock3-42]  
EEL50167.1 NADPH--cytochrome P450 reductase [Bacillus cereus Rock3-44]  
EJR22930.1 hypothetical protein IIA\_02965 [Bacillus cereus VD014]  
EJP91231.1 hypothetical protein IC1\_01786 [Bacillus cereus VD022]  
EJR37623.1 hypothetical protein IIE\_01787 [Bacillus cereus VD045]  
EJR50635.1 hypothetical protein IIK\_01704 [Bacillus cereus VD102]  
EJR64551.1 hypothetical protein IIO\_01875 [Bacillus cereus VD115]  
EJR75620.1 hypothetical protein IK5\_01158 [Bacillus cereus VD154]  
EJR82049.1 hypothetical protein IK7\_02513 [Bacillus cereus VD156]  
EJR83659.1 hypothetical protein IK9\_01715 [Bacillus cereus VD166]  
EJR91135.1 hypothetical protein IKG\_05772 [Bacillus cereus VD200]  
EJR97241.1 hypothetical protein IKG\_03039 [Bacillus cereus VD200]  
EJS05852.1 hypothetical protein IKO\_02508 [Bacillus cereus VDM034]  
EDX58768.1 bifunctional P-450:NADPH-P450 reductase 1 [Bacillus cereus W]  
AAU24352.1 cytochrome P450 / NADPH-ferrihemoprotein reductase [Bacillus licheniformis DSM 13 = ATCC 14580]  
ABY44122.1 cytochrome P450 [Bacillus mycoides KBAB4]  
EDW23201.1 bifunctional P-450/nadph-p450 reductase (cytochrome p450 (bm-3)) (p450bm-3) [Bacillus pumilus ATCC 7061]  
ABV62358.1 NADPH--cytochrome reductase [Bacillus pumilus SAFR-032]  
EIF12263.1 NADPH-ferrihemoprotein reductase [Bacillus sp. 5B6]  
EIF14027.1 NADPH-ferrihemoprotein reductase [Bacillus sp. 5B6]  
EHL75405.1 hypothetical protein HMPREF1014\_01714 [Bacillus sp. 7\_6\_55CFAA\_CT2]  
EJD67577.1 YetO [Bacillus sp. 916]  
EJD68347.1 YrhJ [Bacillus sp. 916]  
EFV73436.1 YrhJ protein [Bacillus sp. BT1B\_CT2]  
CBY93692.1 cytochrome P450 [Bacillus sp. C3]  
AFI27355.1 cytochrome P450 [Bacillus sp. JS]  
AFI29229.1 cytochrome P450 [Bacillus sp. JS]  
EIL85422.1 P-450/nadph-p450 reductase [Bacillus sp. M 2-6]  
ADV93500.1 cytochrome P450 CYP102A3 [Bacillus subtilis BSn5]  
ADV95715.1 putative cytochrome P450 CYP102A2 [Bacillus subtilis BSn5]  
BAI84248.1 hypothetical protein BSNT\_07111 [Bacillus subtilis subsp. natto BEST195]

EFG90288.1 cytochrome P450 CYP102A3 [Bacillus subtilis subsp. spizizenii ATCC 6633 = JCM 2499]  
EFG91781.1 putative cytochrome P450 CYP102A2 [Bacillus subtilis subsp. spizizenii ATCC 6633 = JCM 2499]  
AEP85668.1 cytochrome P450 family [Bacillus subtilis subsp. spizizenii TU-B-10]  
AEP87558.1 cytochrome P450 family [Bacillus subtilis subsp. spizizenii TU-B-10]  
sp|O08336.1|CYPB\_BACSU Bacillus subtilis subsp. subtilis str. 168  
sp|O08394.1|CYPD\_BACSU Bacillus subtilis subsp. subtilis str. 168  
AEP89812.1 cytochrome P450 family [Bacillus subtilis subsp. subtilis str. RO-NN-1]  
AEP91702.1 cytochrome P450 family [Bacillus subtilis subsp. subtilis str. RO-NN-1]  
EHA31094.1 cytochrome P450 [Bacillus subtilis subsp. subtilis str. SC-8]  
ADH07708.1 NADPH-cytochrome P450 reductase [Bacillus thuringiensis BMB171]  
EEM28177.1 NADPH--cytochrome P450 reductase [Bacillus thuringiensis Bt407]  
AFQ14162.1 bifunctional P-450:NADPH-P450 reductase 1 [Bacillus thuringiensis HD-771]  
EEM95517.1 NADPH--cytochrome P450 reductase [Bacillus thuringiensis IBL 200]  
EEN02344.1 NADPH--cytochrome P450 reductase [Bacillus thuringiensis IBL 4222]  
AFU13781.1 NADPH--cytochrome P450 reductase [Bacillus thuringiensis MC28]  
EEM70897.1 NADPH--cytochrome P450 reductase [Bacillus thuringiensis serovar andalousiensis BGSC 4AW1]  
ADY22413.1 bifunctional P-450:NADPH-P450 reductase 1 [Bacillus thuringiensis serovar finitimus YBT-020]  
EEM82895.1 NADPH--cytochrome P450 reductase [Bacillus thuringiensis serovar huazhongensis BGSC 4BD1]  
EEM52818.1 NADPH--cytochrome P450 reductase [Bacillus thuringiensis serovar kurstaki str. T03a001]  
EEM59126.1 NADPH--cytochrome P450 reductase [Bacillus thuringiensis serovar monterrey BGSC 4AJ1]  
EEM47193.1 NADPH--cytochrome P450 reductase [Bacillus thuringiensis serovar pakistani str. T13001]  
EEM76899.1 NADPH--cytochrome P450 reductase [Bacillus thuringiensis serovar pondicheriensis BGSC 4BA1]  
EEM88909.1 NADPH--cytochrome P450 reductase [Bacillus thuringiensis serovar pulsiensis BGSC 4CC1]  
EEM38196.1 NADPH--cytochrome P450 reductase [Bacillus thuringiensis serovar sotto str. T04001]  
EEM21858.1 NADPH--cytochrome P450 reductase [Bacillus thuringiensis serovar tochiensis BGSC 4Y1]  
ABK86139.1 NADPH-cytochrome P450 reductase [Bacillus thuringiensis str. Al Hakam]  
EJQ37805.1 hypothetical protein IEC\_02333 [Bacillus toyonensis]  
CCF04242.1 NADPH-ferrihemoprotein reductase [Bacillus velezensis CAU B946]  
CCF05972.1 NADPH-ferrihemoprotein reductase [Bacillus velezensis CAU B946]  
ABS73124.1 cytochrome P450 [Bacillus velezensis FZB42]  
ABS74786.1 cytochrome P450 [Bacillus velezensis FZB42]  
EKE46398.1 NADPH-ferrihemoprotein reductase [Bacillus velezensis M27]  
EKE48022.1 NADPH-ferrihemoprotein reductase [Bacillus velezensis M27]  
CCG48683.1 NADPH-ferrihemoprotein reductase [Bacillus velezensis YAU B9601-Y2]  
AFJ60789.1 NADPH-ferrihemoprotein reductase, unspecific monooxygenase [Bacillus velezensis YAU B9601-Y2]

AFJ62808.1 NADPH-ferrihemoprotein reductase [Bacillus velezensis YAU B9601-Y2]  
EEK66903.1 NADPH--cytochrome P450 reductase [Bacillus wiedmannii]  
EJQ52935.1 hypothetical protein IEI\_01923 [Bacillus wiedmannii]  
EJS69574.1 hypothetical protein ICW\_02513 [Bacillus wiedmannii]  
EJV63294.1 hypothetical protein IEO\_02651 [Bacillus wiedmannii]  
EKF35778.1 NADPH--hemoprotein reductase [Bacillus xiamenensis]  
EGP08506.1 cytochrome P450 [Bradyrhizobiaceae bacterium SG-6C]  
BAL78328.1 probable P-450/NADPH-P450 reductase [Bradyrhizobium cosmicum]  
BAC48147.1 blr2882 [Bradyrhizobium diazoefficiens USDA 110]  
BAL12135.1 hypothetical protein BJ6T\_68860 [Bradyrhizobium japonicum USDA 6]  
CCE00185.1 putative bifunctional P-450/NADPH-P450 reductase 1 (Includes: Cytochrome P450 102; NADPH--  
cytochrome P450 reductase) [Bradyrhizobium sp. STM 3809]  
EIG57609.1 sulfite reductase, alpha subunit (flavoprotein) [Bradyrhizobium sp. WSM1253]  
EHR02046.1 sulfite reductase, alpha subunit (flavoprotein) [Bradyrhizobium sp. WSM471]  
EJN11211.1 cytochrome P450, partial [Bradyrhizobium sp. YR681]  
CCF15606.1 bifunctional P-450/NADPH-P450 reductase [Brevibacillus laterosporus GI-9]  
CCF12687.1 bifunctional P-450/NADPH-P450 reductase [Brevibacillus laterosporus GI-9]  
ABB05850.1 Cytochrome P450 [Burkholderia lata]  
EHP43606.1 bifunctional P-450:NADPH-P450 reductase [Cupriavidus basilensis OR16]  
ABF10339.1 putative bifunctional P-450:NADPH-P450 reductase 2 (Includes: Cytochrome P450 102; NADPH--  
cytochrome P450 reductase) [Cupriavidus metallidurans CH34]  
CAJ95800.1 probable bifunctional P-450:NADPH-P450 reductase [Cupriavidus necator H16]  
AEI79937.1 bifunctional P-450/NADPH-P450 reductase [Cupriavidus necator N-1]  
AFD27790.1 Bifunctional P-450:NADPH-P450 reductase 1 (plasmid) [Deinococcus gobiensis I-0]  
ABC62112.1 probable bifunctional P-450:NADPH-P450 reductase [Erythrobacter litoralis HTCC2594]  
EAQ27850.1 probable bifunctional P-450:NADPH-P450 reductase [Erythrobacter sp. NAP1]  
EIT84377.1 cytochrome P450 family protein [Fictibacillus macauensis ZFHKF-1]  
CCG43686.1 NADPH--cytochrome P450 oxidoreductase [Halobacillus halophilus DSM 2266]  
ABX05160.1 cytochrome P450 [Herpetosiphon aurantiacus DSM 785]  
BAJ96920.1 predicted protein [Hordeum vulgare subsp. vulgare]  
GAB96874.1 putative cytochrome P450 [Kineosphaera limosa NBRC 100340]  
EFH80345.1 cytochrome P450 [Ktedonobacter racemifer DSM 44963]  
EFH88481.1 cytochrome P450 [Ktedonobacter racemifer DSM 44963]  
EAW32450.1 probable bifunctional P-450:NADPH-P450 reductase [marine gamma proteobacterium HTCC2143]  
EIZ82104.1 cytochrome P450 family protein [Methylobacterium sp. GXF4]  
AEV70722.1 sulfite reductase, alpha subunit (flavoprotein) [Mycolicibacterium rhodesiae NBB3]  
EFC41452.1 cytochrome p450 [Naegleria gruberi]  
ACV78954.1 cytochrome P450 [Nakamurella multipartita DSM 44233]

ACV78964.1 cytochrome P450 [Nakamurella multipartita DSM 44233]  
ACV81379.1 cytochrome P450 [Nakamurella multipartita DSM 44233]  
EIZ78677.1 cytochrome P450 family protein [Novosphingobium sp. Rr 2-17]  
EJW15291.1 NADPH-cytochrome P450 reductase [Paenibacillus alvei DSM 29]  
EJW16173.1 NADPH-cytochrome P450 reductase [Paenibacillus alvei DSM 29]  
EHQ58913.1 CypD [Paenibacillus dendritiformis C454]  
EHQ59900.1 CypD [Paenibacillus dendritiformis C454]  
EHB66924.1 cytochrome P450 [Paenibacillus lactis 154]  
AFH60445.1 NADPH--cytochrome P450 reductase [Paenibacillus mucilaginosus K02]  
AEI42011.1 CypD [Paenibacillus mucilaginosus KNP414]  
ADO57681.1 NADPH--cytochrome P450 reductase [Paenibacillus polymyxa SC2]  
EGG32133.1 bifunctional P-450/NADPH-P450 reductase [Paenibacillus sp. HGF5]  
EGL17662.1 FAD binding domain protein [Paenibacillus sp. HGF7]  
ACX65034.1 cytochrome P450 [Paenibacillus sp. Y412MC10]  
ACT11327.1 cytochrome P450 [Pectobacterium carotovorum subsp. carotovorum PC1]  
AEA28016.1 Unspecific monooxygenase., NADPH--hemoprotein reductase [Pseudonocardia dioxanivorans CB1190]  
EFP68091.1 FAD binding domain protein [Ralstonia pickettii]  
EGY61507.1 hypothetical protein HMPREF0989\_04160 [Ralstonia sp. 5\_2\_56FAA]  
EIE85788.1 hypothetical protein RO3G\_10498 [Rhizopus delemar RA 99-880]  
EIE92534.1 hypothetical protein RO3G\_17132 [Rhizopus delemar RA 99-880]  
BAE46296.1 cytochrome P450 (plasmid) [Rhodococcus erythropolis PR4]  
BAH31604.1 cytochrome P450 [Rhodococcus erythropolis PR4]  
EEN84644.1 unspecific monooxygenase [Rhodococcus erythropolis SK121]  
EEN88978.1 unspecific monooxygenase [Rhodococcus erythropolis SK121]  
ABG96413.1 cytochrome P450 CYP102 [Rhodococcus jostii RHA1]  
BAH52971.1 cytochrome P450 [Rhodococcus opacus B4]  
EHI44575.1 cytochrome P450 CYP102 [Rhodococcus opacus PD630]  
EID73168.1 cytochrome P450 [Rhodococcus opacus RKJ300 = JCM 13270]  
EHK83749.1 cytochrome P450 [Rhodococcus pyridinivorans AK37]  
EJI96173.1 cytochrome P-450 [Rhodococcus sp. JVH1]  
ABI79384.1 cytochrome P450 (plasmid) [Rhodococcus sp. NS1]  
CAR47816.1 putative cytochrome P450 [Rhodococcus sp. PY11]  
AEK26937.1 cytochrome P450 [Rhodococcus sp. R04]  
ABE39056.1 cytochrome P450 [Rhodopseudomonas palustris BisB5]  
ABD08340.1 FAD-binding oxidoreductase [Rhodopseudomonas palustris HaA2]  
CAM03474.1 bifunctional P-450:NADPH-P450 reductase 1 [Saccharopolyspora erythraea NRRL 2338]  
EJF54063.1 sulfite reductase, alpha subunit (flavoprotein) [Saprospira grandis DSM 2844]

AFC23737.1 cytochrome P450 [*Saprospira grandis* str. Lewin]  
ADG98903.1 cytochrome P450 [*Segniliparus rotundus* DSM 44985]  
EGI54680.1 cytochrome P450 family protein [*Sphingomonas* sp. S17]  
AEW97204.1 bifunctional P-450:NADPH-P450 reductase 1 [*Streptantibioticus cattleyicolor* NRRL 8057 = DSM 46488]  
CAJ88567.1 putative cytochrome P450 [*Streptomyces ambofaciens* ATCC 23877]  
BAC68285.1 putative cytochrome P450 / NADPH-ferrihemoprotein reductase [*Streptomyces avermitilis* MA-4680 = NBRC 14893]  
BAC75137.1 cytochrome P450 hydroxylase [*Streptomyces avermitilis* MA-4680 = NBRC 14893]  
EDY51256.1 bifunctional P-450:NADPH-P450 reductase [*Streptomyces clavuligerus*]  
EFG07822.1 bifunctional P-450:NADPH-P450 reductase 1 [*Streptomyces clavuligerus*]  
EHN78335.1 cytochrome P450 [*Streptomyces coelicoflavus* ZG0656]  
CAB66201.1 putative cytochrome P450 [*Streptomyces coelicolor* A3(2)]  
EGG48117.1 P450-like protein [*Streptomyces griseoaurantiacus* M045]  
EFL20831.1 probable bifunctional P-450/NADPH-P450 reductase 1 [*Streptomyces himastatinicus* ATCC 53653]  
EFL28515.1 bifunctional P-450/NADPH-P450 reductase [*Streptomyces himastatinicus* ATCC 53653]  
AEY93311.1 cytochrome P450 [*Streptomyces hygrosopicus* subsp. *jinggangensis* 5008]  
AEY93321.1 bifunctional P-450:NADPH-P450 reductase 1 [*Streptomyces hygrosopicus* subsp. *jinggangensis* 5008]  
EFD71156.1 cytochrome P450 [*Streptomyces lividans* TK24]  
CBG67789.1 putative P450-like protein [*Streptomyces scabiei* 87.22]  
CBG68112.1 P450-like protein [*Streptomyces scabiei* 87.22]  
EFL10082.1 cytochrome P450 [*Streptomyces* sp. AA4]  
EFF88741.1 conserved hypothetical protein [*Streptomyces* sp. e14]  
EDY58112.1 cytochrome P450 [*Streptomyces sviveus* ATCC 29083]  
EFL36674.1 cytochrome P450 [*Streptomyces viridochromogenes* DSM 40736]  
EFL36680.1 bifunctional P-450:NADPH-P450 reductase 1, partial [*Streptomyces viridochromogenes* DSM 40736]  
EFE65335.1 cytochrome P450 [*Streptomyces viridosporus* ATCC 14672]  
EGX54696.1 cytochrome P450, partial [*Streptomyces zinciresistens* K42]  
ACZ89135.1 cytochrome P450 [*Streptosporangium roseum* DSM 43021]  
ABD83817.1 P450 hydroxylase [uncultured soil bacterium]  
ADU39615.1 cytochrome P450 [*Variovorax paradoxus* EPS]  
EJL72014.1 sulfite reductase, alpha subunit (flavoprotein) [*Variovorax* sp. CF313]

Alignment:

|                        |                                                              |    |
|------------------------|--------------------------------------------------------------|----|
| sp P14779.2 CPXB_PRIM2 | -----                                                        | 0  |
| ADF40088.1             | -----                                                        | 0  |
| ADE70259.1             | -----                                                        | 0  |
| AEN88827.1             | -----                                                        | 0  |
| KFN05180.1             | -----                                                        | 0  |
| ACZ37122.1             | -----                                                        | 0  |
| ADA57055.1             | -----                                                        | 0  |
| ADA57058.1             | -----                                                        | 0  |
| ADA57059.1             | -----                                                        | 0  |
| ADA57061.1             | -----                                                        | 0  |
| ADA57062.1             | -----                                                        | 0  |
| ADA57068.1             | -----                                                        | 0  |
| AAT62301.1             | -----                                                        | 0  |
| AAM54108.1             | -----                                                        | 0  |
| EFQ83738.1             | -----                                                        | 0  |
| EFL88452.1             | -----                                                        | 0  |
| BAF89518.1             | -MSETSTPPALKSVDLGLAAGTVRVGWFFPGASREAVLAAVRGAAG----LSGE-----T | 49 |
| CBI43648.1             | -----                                                        | 0  |
| AEB22839.1             | -----                                                        | 0  |
| EDT22025.1             | -----                                                        | 0  |
| AFH84458.1             | -----                                                        | 0  |
| ADP31197.1             | -----                                                        | 0  |
| ACP19384.1             | -----                                                        | 0  |
| ADL27534.1             | -----                                                        | 0  |
| ACO29732.1             | -----                                                        | 0  |
| EDX65100.1             | -----                                                        | 0  |
| EEK61456.1             | -----                                                        | 0  |
| EEL16232.1             | -----                                                        | 0  |
| EDZ53094.1             | -----                                                        | 0  |
| EEL81346.1             | -----                                                        | 0  |
| EEL87105.1             | -----                                                        | 0  |
| EEL75761.1             | -----                                                        | 0  |
| ACK88541.1             | -----                                                        | 0  |
| EJQ05303.1             | -----                                                        | 0  |
| EEK50040.1             | -----                                                        | 0  |
| AAS42149.1             | -----                                                        | 0  |

|            |       |   |
|------------|-------|---|
| AAP10153.1 | ----- | 0 |
| EEK83466.1 | ----- | 0 |
| ACK63698.1 | ----- | 0 |
| EJS57156.1 | ----- | 0 |
| EJS56605.1 | ----- | 0 |
| EJS68951.1 | ----- | 0 |
| EJQ10567.1 | ----- | 0 |
| EJQ13433.1 | ----- | 0 |
| EJQ20399.1 | ----- | 0 |
| EJQ30236.1 | ----- | 0 |
| EJQ51278.1 | ----- | 0 |
| EEL10858.1 | ----- | 0 |
| EEL05393.1 | ----- | 0 |
| EEK94080.1 | ----- | 0 |
| EEK99882.1 | ----- | 0 |
| EEK55784.1 | ----- | 0 |
| ADK05784.1 | ----- | 0 |
| AAU17340.1 | ----- | 0 |
| EEL64394.1 | ----- | 0 |
| AEW56259.1 | ----- | 0 |
| AFQ11690.1 | ----- | 0 |
| EAL16831.1 | ----- | 0 |
| ACK94296.1 | ----- | 0 |
| EDZ58760.1 | ----- | 0 |
| EJV84218.1 | ----- | 0 |
| EJQ69212.1 | ----- | 0 |
| EJQ80339.1 | ----- | 0 |
| EJV81602.1 | ----- | 0 |
| EJQ95474.1 | ----- | 0 |
| EEK44229.1 | ----- | 0 |
| EEK88560.1 | ----- | 0 |
| EJR07451.1 | ----- | 0 |
| EJR16542.1 | ----- | 0 |
| BAL18840.1 | ----- | 0 |
| EDX69960.1 | ----- | 0 |
| ACM13462.1 | ----- | 0 |
| EEK75631.1 | ----- | 0 |
| EEL25491.1 | ----- | 0 |

|                        |                                                             |    |
|------------------------|-------------------------------------------------------------|----|
| EEL21990.1             | -----                                                       | 0  |
| EEL33825.1             | -----                                                       | 0  |
| EEL44933.1             | -----                                                       | 0  |
| EEL50167.1             | MFSQTS----IRRNSLSCCYHPLHINWPHSCF-----GELYNCNKRQKEMETSY----- | 45 |
| EJR22930.1             | -----                                                       | 0  |
| EJP91231.1             | -----                                                       | 0  |
| EJR37623.1             | -----                                                       | 0  |
| EJR50635.1             | -----                                                       | 0  |
| EJR64551.1             | -----                                                       | 0  |
| EJR75620.1             | -----                                                       | 0  |
| EJR82049.1             | -----                                                       | 0  |
| EJR83659.1             | -----                                                       | 0  |
| EJR91135.1             | -----                                                       | 0  |
| EJR97241.1             | -----                                                       | 0  |
| EJS05852.1             | -----                                                       | 0  |
| EDX58768.1             | -----                                                       | 0  |
| AAU24352.1             | -----                                                       | 0  |
| ABY44122.1             | -----                                                       | 0  |
| EDW23201.1             | -----                                                       | 0  |
| ABV62358.1             | -----                                                       | 0  |
| EIF12263.1             | -----                                                       | 0  |
| EIF14027.1             | -----                                                       | 0  |
| EHL75405.1             | -----                                                       | 0  |
| EJD67577.1             | -----                                                       | 0  |
| EJD68347.1             | -----                                                       | 0  |
| EFV73436.1             | -----                                                       | 0  |
| CBY93692.1             | -----                                                       | 0  |
| AFI27355.1             | -----                                                       | 0  |
| AFI29229.1             | -----                                                       | 0  |
| EIL85422.1             | -----                                                       | 0  |
| ADV93500.1             | -----                                                       | 0  |
| ADV95715.1             | -----                                                       | 0  |
| BAI84248.1             | -----                                                       | 0  |
| EFG90288.1             | -----                                                       | 0  |
| EFG91781.1             | -----                                                       | 0  |
| AEP85668.1             | -----                                                       | 0  |
| AEP87558.1             | -----                                                       | 0  |
| sp O08336.1 CYPB_BACSU | -----                                                       | 0  |

|                        |       |   |
|------------------------|-------|---|
| sp 008394.1 CYPD_BACSU | ----- | 0 |
| AEP89812.1             | ----- | 0 |
| AEP91702.1             | ----- | 0 |
| EHA31094.1             | ----- | 0 |
| ADH07708.1             | ----- | 0 |
| EEM28177.1             | ----- | 0 |
| AFQ14162.1             | ----- | 0 |
| EEM95517.1             | ----- | 0 |
| EEN02344.1             | ----- | 0 |
| AFU13781.1             | ----- | 0 |
| EEM70897.1             | ----- | 0 |
| ADY22413.1             | ----- | 0 |
| EEM82895.1             | ----- | 0 |
| EEM52818.1             | ----- | 0 |
| EEM59126.1             | ----- | 0 |
| EEM47193.1             | ----- | 0 |
| EEM76899.1             | ----- | 0 |
| EEM88909.1             | ----- | 0 |
| EEM38196.1             | ----- | 0 |
| EEM21858.1             | ----- | 0 |
| ABK86139.1             | ----- | 0 |
| EJQ37805.1             | ----- | 0 |
| CCF04242.1             | ----- | 0 |
| CCF05972.1             | ----- | 0 |
| ABS73124.1             | ----- | 0 |
| ABS74786.1             | ----- | 0 |
| EKE46398.1             | ----- | 0 |
| EKE48022.1             | ----- | 0 |
| CCG48683.1             | ----- | 0 |
| AFJ60789.1             | ----- | 0 |
| AFJ62808.1             | ----- | 0 |
| EEK66903.1             | ----- | 0 |
| EJQ52935.1             | ----- | 0 |
| EJS69574.1             | ----- | 0 |
| EJV63294.1             | ----- | 0 |
| EKF35778.1             | ----- | 0 |
| EGP08506.1             | ----- | 0 |
| BAL78328.1             | ----- | 0 |

|            |             |   |
|------------|-------------|---|
| BAC48147.1 | -----       | 0 |
| BAL12135.1 | -----       | 0 |
| CCE00185.1 | -----       | 0 |
| EIG57609.1 | -----       | 0 |
| EHR02046.1 | -----       | 0 |
| EJN11211.1 | -----       | 0 |
| CCF15606.1 | -----       | 0 |
| CCF12687.1 | -----       | 0 |
| ABB05850.1 | -----       | 0 |
| EHP43606.1 | -----MQ-    | 2 |
| ABF10339.1 | -----       | 0 |
| CAJ95800.1 | -----MPPPI- | 5 |
| AEI79937.1 | -----MPPPI- | 5 |
| AFD27790.1 | -----       | 0 |
| ABC62112.1 | -----       | 0 |
| EAQ27850.1 | -----       | 0 |
| EIT84377.1 | -----       | 0 |
| CCG43686.1 | -----       | 0 |
| ABX05160.1 | -----       | 0 |
| BAJ96920.1 | -----       | 0 |
| GAB96874.1 | -----MTEN-  | 4 |
| EFH80345.1 | -----       | 0 |
| EFH88481.1 | -----       | 0 |
| EAW32450.1 | -----       | 0 |
| EIZ82104.1 | -----       | 0 |
| AEV70722.1 | -----       | 0 |
| EFC41452.1 | -----MSTQ-  | 4 |
| ACV78954.1 | -----       | 0 |
| ACV78964.1 | -----       | 0 |
| ACV81379.1 | -----       | 0 |
| EIZ78677.1 | -----       | 0 |
| EJW15291.1 | -----       | 0 |
| EJW16173.1 | -----       | 0 |
| EHQ58913.1 | -----       | 0 |
| EHQ59900.1 | -----       | 0 |
| EHB66924.1 | -----       | 0 |
| AFH60445.1 | -----       | 0 |
| AEI42011.1 | -----       | 0 |

|            |                                                               |    |
|------------|---------------------------------------------------------------|----|
| ADO57681.1 | -----                                                         | 0  |
| EGL32133.1 | -----                                                         | 0  |
| EGL17662.1 | -----                                                         | 0  |
| ACX65034.1 | -----                                                         | 0  |
| ACT11327.1 | -----                                                         | 0  |
| AEA28016.1 | -----                                                         | 0  |
| EFP68091.1 | -----                                                         | 0  |
| EGY61507.1 | -----                                                         | 0  |
| EIE85788.1 | -MSTENLTTLIVA--LKNATNIEKEGCI IQFGNGANLDTIRALAAEKLNITDGYANIRLL | 57 |
| EIE92534.1 | -MSTDNTTSLIVV--LRNTSDVEKDGRIIRFGNGANLDTIRSLAAEKLAITGGYANIQLF  | 57 |
| BAE46296.1 | -----MNG-----PRGS                                             | 7  |
| BAH31604.1 | -----                                                         | 0  |
| EEN84644.1 | -----                                                         | 0  |
| EEN88978.1 | -MQNASSEGFRKT-----VGSENGWINTRRSASGSLSRQPWFSR----SVGA-LLPPGW   | 47 |
| ABG96413.1 | -----MPV-                                                     | 3  |
| BAH52971.1 | -----                                                         | 0  |
| EHI44575.1 | -----MVMPV-                                                   | 5  |
| EID73168.1 | -----                                                         | 0  |
| EHK83749.1 | -----                                                         | 0  |
| EJI96173.1 | -----                                                         | 0  |
| ABI79384.1 | -----M-                                                       | 1  |
| CAR47816.1 | -----MVS-G-                                                   | 4  |
| AEK26937.1 | -----                                                         | 0  |
| ABE39056.1 | -----                                                         | 0  |
| ABD08340.1 | -----                                                         | 0  |
| CAM03474.1 | -----                                                         | 0  |
| EJF54063.1 | -----                                                         | 0  |
| AFC23737.1 | -----                                                         | 0  |
| ADG98903.1 | -----                                                         | 0  |
| EGI54680.1 | -----                                                         | 0  |
| AEW97204.1 | -----                                                         | 0  |
| CAJ88567.1 | -----                                                         | 0  |
| BAC68285.1 | -----                                                         | 0  |
| BAC75137.1 | -----                                                         | 0  |
| EDY51256.1 | -----                                                         | 0  |
| EFG07822.1 | -----MNP----                                                  | 3  |
| EHN78335.1 | -----                                                         | 0  |
| CAB66201.1 | -----                                                         | 0  |

|            |                                                 |    |
|------------|-------------------------------------------------|----|
| EGG48117.1 | -----                                           | 0  |
| EFL20831.1 | -----                                           | 0  |
| EFL28515.1 | -----                                           | 0  |
| AEY93311.1 | -----                                           | 0  |
| AEY93321.1 | -----                                           | 0  |
| EFD71156.1 | -----                                           | 0  |
| CBG67789.1 | -----                                           | 0  |
| CBG68112.1 | -----                                           | 0  |
| EFL10082.1 | -----MLPPLF                                     | 6  |
| EFF88741.1 | -----                                           | 0  |
| EDY58112.1 | -----                                           | 0  |
| EFL36674.1 | -----                                           | 0  |
| EFL36680.1 | -MPPCH-----AG-----APRARAERVPLHN-----HVGPPCGPPGA | 32 |
| EFE65335.1 | -----                                           | 0  |
| EGX54696.1 | -----                                           | 0  |
| ACZ89135.1 | -----                                           | 0  |
| ABD83817.1 | -----                                           | 0  |
| ADU39615.1 | -----                                           | 0  |
| EJL72014.1 | -----                                           | 0  |

```

sp|P14779.2|CPXB_PRIM2 -----M-TIKEMPQPKT 11
ADF40088.1 -----M-TIKEMPQPKT 11
ADE70259.1 -----M-PIKEMPQPKT 11
AEN88827.1 -----M-TIKEMPQPKT 11
KFN05180.1 -----M-TIKEMPQPKT 11
ACZ37122.1 -----M-TIKEMPQPKT 11
ADA57055.1 -----M-TIKEMPQPKT 11
ADA57058.1 -----M-TIKEMPQPKT 11
ADA57059.1 -----M-TIKEMPQPKT 11
ADA57061.1 -----M-TIKEMPQPKT 11
ADA57062.1 -----M-TIKEMPQPKT 11
ADA57068.1 -----M-TIKEMPQPKT 11
AAT62301.1 -----MDKKVSAIPQPKT 13
AAM54108.1 -----MVATGTRIPGPK 13
EFQ83738.1 -----MRNDWS-GQTFPHPPG 15
EFL88452.1 -----MSQTTVRIPTPKK 13
BAF89518.1 AF----HVETADGVTIA----LDDSVFVMDKKVSAIPQPKT 98
CBI43648.1 -----MK-QLSAIPQPKT 12
AEB22839.1 -----MK-ETSPIPKPKT 12
EDT22025.1 -----MDKKVSAIPQPKT 13
AFH84458.1 -----MLFERVFVMDKKVSAIPQPKT 21
ADP31197.1 -----MK-KTSPPIQPKT 12
ACP19384.1 -----MDKKVSAIPQPKT 13
ADL27534.1 -----MEKKVSAIPQPKT 13
ACO29732.1 -----MDKKVSAIPQPKT 13
EDX65100.1 -----MDKKVSAIPQPKT 13
EEK61456.1 -----MEKKVSAIPQPKT 13
EEL16232.1 -----MLFERVFVMDKKVSAIPQPKT 21
EDZ53094.1 -----MEKKVSAIPQPKT 13
EEL81346.1 -----MG---YFILCFFERVFLMDKKVSDIPQPKT 27
EEL87105.1 -----MG---YFISCFFERVFLMDKKVSAIPQPKT 27
EEL75761.1 -----0
ACK88541.1 -----MDKKVSAIPQPKT 13
EJQ05303.1 -----MDKKVSAIPQPKT 13
EEK50040.1 -----MEKKVSAIPQPKT 13
AAS42149.1 -----MDKKVSAIPQPKT 13
AAP10153.1 -----MEKKVSAIPQPKT 13
EEK83466.1 -----MLFERVFVMDKKVSGIPQPKT 21

```

|            |                                     |    |
|------------|-------------------------------------|----|
| ACK63698.1 | -----                               | 0  |
| EJS57156.1 | -----MEKKVSAIPQPKT                  | 13 |
| EJS56605.1 | -----MDKKVSAIPQPKT                  | 13 |
| EJS68951.1 | -----MR-KLNDIPQPKT                  | 12 |
| EJQ10567.1 | -----MEKKVSAIPQPKT                  | 13 |
| EJQ13433.1 | -----MDKKVSAIPQPKT                  | 13 |
| EJQ20399.1 | -----MEKKVSAIPQPKT                  | 13 |
| EJQ30236.1 | -----MEKKVSAIPQPKT                  | 13 |
| EJQ51278.1 | -----MK-KLNDIPQPKT                  | 12 |
| EEL10858.1 | -----MEKKVSAIPQPKT                  | 13 |
| EEL05393.1 | -----MG---YFISCFFERVFLMDKKVSAIPQPKT | 27 |
| EEK94080.1 | -----MFLMEKKVSAIPQPKT               | 16 |
| EEK99882.1 | -----MFVMDKKVSAIPQPKT               | 16 |
| EEK55784.1 | -----MLFERVFVMDKKVSAIPQPKT          | 21 |
| ADK05784.1 | -----MDKKVSAIPQPKT                  | 13 |
| AAU17340.1 | -----MDKKVSAIPQPKT                  | 13 |
| EEL64394.1 | -----MEKKVSAIPQPKT                  | 13 |
| AEW56259.1 | -----MDKKVSAIPQPKT                  | 13 |
| AFQ11690.1 | -----MDKKVSAIPQPKT                  | 13 |
| EAL16831.1 | -----MDKKVSGIPQPKT                  | 13 |
| ACK94296.1 | -----MEKKVSAIPQPKT                  | 13 |
| EDZ58760.1 | -----MDKKVSAIPQPKT                  | 13 |
| EJV84218.1 | -----MDKKVSAIPQPKT                  | 13 |
| EJQ69212.1 | -----MDKKVSAIPQPKT                  | 13 |
| EJQ80339.1 | -----MKKKSAIPQPKT                   | 13 |
| EJV81602.1 | -----MEKKVSAIPQPKT                  | 13 |
| EJQ95474.1 | -----MDKKVSAIPQPKT                  | 13 |
| EEK44229.1 | -----MLFERVFVMDKKVSAIPQPKT          | 21 |
| EEK88560.1 | -----MEKKVSAIPQPKT                  | 13 |
| EJR07451.1 | -----MEKKVSAIPQPKT                  | 13 |
| EJR16542.1 | -----MDKKVSAIPQPKT                  | 13 |
| BAL18840.1 | -----MDKKVSAIPQPKT                  | 13 |
| EDX69960.1 | -----MDKKVSAIPQPKT                  | 13 |
| ACM13462.1 | -----MDKKVSAIPQPKT                  | 13 |
| EEK75631.1 | -----MDKKVSAIPQPKT                  | 13 |
| EEL25491.1 | -----                               | 0  |
| EEL21990.1 | -----MLFERVFLMDKKVSAIPQPKT          | 21 |
| EEL33825.1 | -----MLFERVFLMDKKVSAIPQPKT          | 21 |

|                        |                                                       |    |
|------------------------|-------------------------------------------------------|----|
| EEL44933.1             | -----MLFERVFVMDKKVSAIPQPKT                            | 21 |
| EEL50167.1             | QTHLKSCLKVQIGKIS-----QARI---ITKTCSFERMFLMK-KLNDIPQPKT | 91 |
| EJR22930.1             | -----MEKKVSAIPQPKT                                    | 13 |
| EJP91231.1             | -----MEKKVSAIPQPKT                                    | 13 |
| EJR37623.1             | -----MEKKVSAIPQPKT                                    | 13 |
| EJR50635.1             | -----MDKKVSAIPQPKT                                    | 13 |
| EJR64551.1             | -----MDKKVSAIPQPKT                                    | 13 |
| EJR75620.1             | -----MEKKVSAIPQPKT                                    | 13 |
| EJR82049.1             | -----MEKKVSAIPQPKT                                    | 13 |
| EJR83659.1             | -----MEKKVSAIPQPKT                                    | 13 |
| EJR91135.1             | -----MR-KFMPIQPKT                                     | 12 |
| EJR97241.1             | -----MEKKVSAIPQPKT                                    | 13 |
| EJS05852.1             | -----MDKKVSAIPQPKT                                    | 13 |
| EDX58768.1             | -----MDKKVSAIPQPKT                                    | 13 |
| AAU24352.1             | -----MN-KLDGIPIPKT                                    | 12 |
| ABY44122.1             | -----MDKKVSAIPQPKT                                    | 13 |
| EDW23201.1             | -----MQ-QTSIIPKPKT                                    | 12 |
| ABV62358.1             | -----MQ-QTSIIPKPKT                                    | 12 |
| EIF12263.1             | -----MK-ETGPIQPKT                                     | 12 |
| EIF14027.1             | -----MK-QLSAIPQPKT                                    | 12 |
| EHL75405.1             | -----MEKKVSAIPQPKT                                    | 13 |
| EJD67577.1             | -----MK-ETGPIQPKT                                     | 12 |
| EJD68347.1             | -----MK-QLSAIPQPKT                                    | 12 |
| EFV73436.1             | -----MD---EMLFSKTERMIFMN-KLDGIPIPKT                   | 26 |
| CBY93692.1             | -----MDKKVSAIPQPKT                                    | 13 |
| AFI27355.1             | -----MK-ETSPIQPKT                                     | 12 |
| AFI29229.1             | -----MK-QASAIQPKT                                     | 12 |
| EIL85422.1             | -----MQ-QTSIIPKPKT                                    | 12 |
| ADV93500.1             | -----MK-QASAIQPKT                                     | 12 |
| ADV95715.1             | -----MK-ETSPIQPKT                                     | 12 |
| BAI84248.1             | -----MK-ETSPIQPKT                                     | 12 |
| EFG90288.1             | -----MK-QASAIQPKT                                     | 12 |
| EFG91781.1             | -----MK-ETSPIQPKT                                     | 12 |
| AEP85668.1             | -----MK-ETSPIQPKT                                     | 12 |
| AEP87558.1             | -----MK-QASAIQPKT                                     | 12 |
| sp 008336.1 CYPB_BACSU | -----MK-QASAIQPKT                                     | 12 |
| sp 008394.1 CYPD_BACSU | -----MK-ETSPIQPKT                                     | 12 |
| AEP89812.1             | -----MK-ETSPIQPKT                                     | 12 |

|            |                                    |    |
|------------|------------------------------------|----|
| AEP91702.1 | -----MK-QASAIQPQKT                 | 12 |
| EHA31094.1 | -----MLMK-QASAIQPQKT               | 14 |
| ADH07708.1 | -----MEKKVSAIQPQKT                 | 13 |
| EEM28177.1 | -----MEKKVSAIQPQKT                 | 13 |
| AFQ14162.1 | -----MEKKVSAIQPQKT                 | 13 |
| EEM95517.1 | -----MEKKVSVIPQPKT                 | 13 |
| EEN02344.1 | -----MEKKVSAIQPQKT                 | 13 |
| AFU13781.1 | -----MLFERVFLMDKKVSAIQPQKT         | 21 |
| EEM70897.1 | -----MLFERVFVMDKKVSAIQPQKT         | 21 |
| ADY22413.1 | -----MDKKVSAIQPQKT                 | 13 |
| EEM82895.1 | -----MEKKVSAIQPQKT                 | 13 |
| EEM52818.1 | -----MEKKVSAIQPQKT                 | 13 |
| EEM59126.1 | -----MLFERVFLMDKKVSAIQPQKT         | 21 |
| EEM47193.1 | -----                              | 0  |
| EEM76899.1 | -----MLFERVFVMDKKVSAIQPQKT         | 21 |
| EEM88909.1 | -----MLFERVFVMDKKVSAIQPQKT         | 21 |
| EEM38196.1 | -----MEKKVSAIQPQKT                 | 13 |
| EEM21858.1 | -----MFVMDKKVSAIQPQKT              | 16 |
| ABK86139.1 | -----MLFERVFLMDKKVSAIQPQKT         | 21 |
| EJQ37805.1 | -----MDKKVSAIQPQKT                 | 13 |
| CCF04242.1 | -----MK-ETGPIQPQKT                 | 12 |
| CCF05972.1 | -----MK-QLSAIQPQKT                 | 12 |
| ABS73124.1 | -----MK-ETGPIQPQKT                 | 12 |
| ABS74786.1 | -----MK-QLSAIQPQKT                 | 12 |
| EKE46398.1 | -----MK-ETGPIQPQKT                 | 12 |
| EKE48022.1 | -----MK-QLSAIQPQKT                 | 12 |
| CCG48683.1 | -----MK-ETGPIQPQKT                 | 12 |
| AFJ60789.1 | -----MLERVLFMK-ETGPIQPQKT          | 19 |
| AFJ62808.1 | -----MK-QLSAIQPQKT                 | 12 |
| EEK66903.1 | -----MG--YFILCFFERVFLMDKKVSAIQPQKT | 27 |
| EJQ52935.1 | -----MDKKVSAIQPQKT                 | 13 |
| EJS69574.1 | -----MEKKISAIQPQKT                 | 13 |
| EJV63294.1 | -----MEKKVSAIQPQKT                 | 13 |
| EKF35778.1 | -----MH-QTSIIPKPKT                 | 12 |
| EGP08506.1 | -----MSSPNKLNPIPHPPK               | 15 |
| BAL78328.1 | -----MSSKNRLDPIQPPT                | 15 |
| BAC48147.1 | -----MSSKNRLDPIQPPT                | 15 |
| BAL12135.1 | -----MSSKNRLDPIQPPT                | 15 |

|            |                                                              |    |
|------------|--------------------------------------------------------------|----|
| CCE00185.1 | -----MPSSNRLSPIQPQPPA                                        | 15 |
| EIG57609.1 | -----MSSKNRLDPIQPQPT                                         | 15 |
| EHR02046.1 | -----MSSKNRLDPIQPQPT                                         | 15 |
| EJN11211.1 | -----MSSKNRLDPIQPQPT                                         | 15 |
| CCF15606.1 | -----                                                        | 0  |
| CCF12687.1 | -----MK-EVGYIPQPKT                                           | 12 |
| ABB05850.1 | -----MKSSSLVPQPPL                                            | 12 |
| EHP43606.1 | RVS-----TPASTA-PAAP-----ATAAPAAHPARALEPIPRDPG                | 36 |
| ABF10339.1 | -----MSTATPAAALEPIPRDPG                                      | 18 |
| CAJ95800.1 | ELS-----SP-DQA-SDAP-----HQAPARSMHAPIPEPIPRDPG                | 38 |
| AEI79937.1 | ELS-----SP-DQA-SDAP-----HPSPARPMHAPNPEPIPRDPG                | 38 |
| AFD27790.1 | -----MTLPPIAPQA                                              | 10 |
| ABC62112.1 | -----MDAPTALAPIQPFG                                          | 15 |
| EAQ27850.1 | -----MATNATLTPIQPFG                                          | 15 |
| EIT84377.1 | -----MA-ETIAIPQPKT                                           | 12 |
| CCG43686.1 | -----ME-KTNHLPQPKS                                           | 12 |
| ABX05160.1 | -----MSISSPIRYIPQPPT                                         | 15 |
| BAJ96920.1 | -----MYEKIPQPPT                                              | 10 |
| GAB96874.1 | RS----HSPSPT--STT----QTTQTTQTTQAHTP----TEASKPTQAAPASTPVPQPEP | 50 |
| EFH80345.1 | -----MQIEEKTLSIPQPQK                                         | 16 |
| EFH88481.1 | -----MLRSQLDTI----                                           | 9  |
| EAW32450.1 | -----MSQIPEPKG                                               | 9  |
| EIZ82104.1 | -----MAPTAPIQPFRP                                            | 12 |
| AEV70722.1 | -----MAELTPSLPPQLDDVPSAVG                                    | 20 |
| EFC41452.1 | NN----EAQCPF--ASA-----DSRRN----SKGSNGSNQPCKEEPIQPPEP         | 41 |
| ACV78954.1 | -----MTDKAIPHPKA                                             | 11 |
| ACV78964.1 | -----MTEPITLDQLPGPRG                                         | 15 |
| ACV81379.1 | -----MTAPISVDQLPGPHG                                         | 15 |
| EIZ78677.1 | -----MTDLIPQPRT                                              | 10 |
| EJW15291.1 | -----MSISIPQPKT                                              | 10 |
| EJW16173.1 | -----MSES-NSPHIPQPKT                                         | 14 |
| EHQ58913.1 | -----MTIAIPQPRT                                              | 10 |
| EHQ59900.1 | -----MP-ESVAVPQPKT                                           | 12 |
| EHB66924.1 | -----M-LTKGIPQPKT                                            | 11 |
| AFH60445.1 | -----MT-QTSQIPQPKT                                           | 12 |
| AEI42011.1 | -----MT-QTSQIPQPKT                                           | 12 |
| ADO57681.1 | -----MT-STNSIPQPKT                                           | 12 |
| EGG32133.1 | -----MT-QTKEVPQPKT                                           | 12 |

|            |                                                               |     |
|------------|---------------------------------------------------------------|-----|
| EGL17662.1 | -----MAK-SEPLIPQPKT                                           | 13  |
| ACX65034.1 | -----MT-QTKEVPQPKT                                            | 12  |
| ACT11327.1 | -----MSGKTAVPQPPI                                             | 12  |
| AEA28016.1 | -----MTTTEIREASEIPGPPP                                        | 17  |
| EFP68091.1 | -----MRS-----ASELPANASPAAAEPQPQPKG                            | 24  |
| EGY61507.1 | -----MRS-----ASELPANASPAAAEPQPQPKG                            | 24  |
| EIE85788.1 | NS----KGELFDGIDKV-----R-----NQQIVYVDTKTKIQETIPGPMK            | 93  |
| EIE92534.1 | NS----NGELGGIDDL-----R-----QQQVVYVDIKELIRETVPGPTK             | 93  |
| BAE46296.1 | RTRP--RRASLVNLAVLGVVLVHTVLMASADKCPYPKSATRAGEITAVQPQVFESIPSPAW | 65  |
| BAH31604.1 | -----MSVDTTPEATTDARIPHPAW                                     | 20  |
| EEN84644.1 | -----MSVDTTPEATTDARIPHPAW                                     | 20  |
| EEN88978.1 | RLCV--PSFILRRVGLGSETDARLSTMSSDKCPYPSETPTSEVAVKPVLEFESIPSPAW   | 105 |
| ABG96413.1 | -----TVLLDTGSVRGTLRTRHQFSNAGHIDTG-VDMSVE-SLHTTADATIPHPRW      | 52  |
| BAH52971.1 | -----MSVE-SLHTTADAIIPHPRW                                     | 19  |
| EHI44575.1 | -----TVLLDTGSVRRTLRTRHQFSNAGHIDTG-VDMSVE-SLHTTAEATIPHPRW      | 54  |
| EID73168.1 | -----MSVE-SLHTTSEATIPHPRW                                     | 19  |
| EHK83749.1 | -----                                                         | 0   |
| EJI96173.1 | -----MSVE-SLHTTADATIPHPRW                                     | 19  |
| ABI79384.1 | -----RDSADR-----EGVRHTLAMTSVGSAR-SGESAPSGGAEGSAGVEPRMPRPSR    | 48  |
| CAR47816.1 | -----GGSAAE-----IAVRHTRAMTSVGSAS-SGDTAPNAPAEGKV-AEQRMRPSW     | 50  |
| AEK26937.1 | -----MHTRRMGSPTT-----TSITMTTGAQPIQPQPRW                       | 28  |
| ABE39056.1 | -----MPSTNKLDPIPHPPK                                          | 15  |
| ABD08340.1 | -----MSSSNKLAPIPHPPK                                          | 15  |
| CAM03474.1 | -----MTQT-PLH-----HD                                          | 9   |
| EJF54063.1 | -----MLHSP-----TNQLFSLMKSPVSKPIPHPPPI                         | 26  |
| AFC23737.1 | -----MKSPVSKPIPHPPPI                                          | 14  |
| ADG98903.1 | -----MTDPIAAEKPTRAGLPHPRF                                     | 20  |
| EGI54680.1 | -----MATIPQPKG                                                | 9   |
| AEW97204.1 | -----MSPT-PHSASG-----TTGAAAATPGAA-SPAP                        | 26  |
| CAJ88567.1 | -----MAG-TTNGLAPDGLPKG-FR---SAELGWPELHRIPRPPY                 | 35  |
| BAC68285.1 | -----MTTQPETDLRPIRSPRG                                        | 17  |
| BAC75137.1 | -----MAQSTRTVIPKG-FR---SAELGWPELHRIPHPPH                      | 31  |
| EDY51256.1 | -----                                                         | 0   |
| EFG07822.1 | -----STALRRSTR-----ATGRR--IG-T-----APGAGSV-PERT               | 31  |
| EHN78335.1 | -----MAQ-TAREPARDGLPKG-FR---SAELGWPELHRIPHPPY                 | 35  |
| CAB66201.1 | -----MAQ-TAREPARDGLPKG-FR---SAELGWPELHRIPHPPY                 | 35  |
| EGG48117.1 | -----MARTRTEAAA-RTAPGTPEGLPKG-FR---GAEAGWPALHRIPHPPR          | 42  |
| EFL20831.1 | -----MEGKLMTKT-S-----LRGIEPI-PQRP                             | 21  |

|            |                                                        |    |
|------------|--------------------------------------------------------|----|
| EFL28515.1 | -----MTET-PLLP-----AGTAEG-DSSD                         | 18 |
| AEY93311.1 | -----MA-ATTETMETGLPKG-FR---SAEQGWPELRRIPRPPH           | 34 |
| AEY93321.1 | -----MPPT-A-----LRTEPA-GTLT                            | 15 |
| EFD71156.1 | -----MAQ-TAREPARDGLPKG-FR---SAELGWPELHRIPHPPY          | 35 |
| CBG67789.1 | -----MTHA-T-----ERGTESI-PERS                           | 16 |
| CBG68112.1 | -----MTATTAATAISG-FR---SAELGWPELHRIPHPPF               | 31 |
| EFL10082.1 | GAQARPHPPSLLDTGSA-----AGDRDPIGCG-F---SRRERTLDTTAIPHRPG | 51 |
| EFF88741.1 | -----MTQA-P-----PTKPQAI-PERP                           | 16 |
| EDY58112.1 | -----MAETTTATRPTG-FR---SAELGWPDLHRIPHPPR               | 31 |
| EFL36674.1 | -----MRTGRWIKGDRD-MTEAPIRAGMPKG-FR---SAELGWPELDRIPHPPH | 44 |
| EFL36680.1 | VDHA---GSQYFRTAK---GSCRVMRPT-A-----QSPRPA-DSLP         | 65 |
| EFE65335.1 | -----MAETTTGGPPTG-FR---SAELGWPELHRIPHPPY               | 32 |
| EGX54696.1 | -----MAQTRTGDGLPKG-FR---SAEHGWPQLSRIPHPPY              | 32 |
| ACZ89135.1 | -----MTDHAGSARIPQPPM                                   | 15 |
| ABD83817.1 | -----MASNNKMSPIPQPPT                                   | 15 |
| ADU39615.1 | -----MAGKNSLYPIPHPAK                                   | 15 |
| EJL72014.1 | -----MAGKNSLHPIPHPAK                                   | 15 |

```

sp|P14779.2|CPXB_PRIM2      F-GELKNLPLLN---TDKPVQALMKIADEL-GEIFKFEAPGR-----VTRYLSSQRLIKE 61
ADF40088.1                  F-GELKNLPLLN---TDKPVQALMKIADEL-GEIFKFEAPGR-----VTRYLSSQRLIKE 61
ADE70259.1                  F-GELKNLPLLN---TDKPIQTLMKIADEL-GEIFKFEAPGR-----VTRYLSSQRLIKE 61
AEN88827.1                  F-GELKNLPLLN---TDKPIQTLMKIADEL-GEIFKFEAPGR-----VTRYLSSQRLIKE 61
KFN05180.1                  F-GELKNLPLLN---TDKPVQALMKIADEL-GEIFKFEAPGR-----VTRYLSSQRLIKE 61
ACZ37122.1                  F-GELKNLPLLN---TDKPIQTLMKIADEL-GEIFKFEAPGR-----VTRYLSSQRLIKE 61
ADA57055.1                  F-GELKNLPLLN---TDKPIQTLMKIADEL-GEIFKFEAPGR-----VTRYLSSQRLIKE 61
ADA57058.1                  F-GELKNLPLLN---TDKPIQTLMKIADEL-GEIFKFEAPGR-----VTRYLSSQRLIKE 61
ADA57059.1                  F-GELKNLPLLN---TDKPVQALMKIADEL-GEIFKFEAPGR-----VTRYLSSQRLIKE 61
ADA57061.1                  F-GELKNLPLLN---TDKPIQTLMKIADEL-GEIFKFEAPGR-----VTRYLSSQRLIKE 61
ADA57062.1                  F-GELKNLPLLN---TDKPIQTLMKIADEL-GEIFKFEAPGR-----VTRYLSSQRLIKE 61
ADA57068.1                  F-GELKNLPLLN---TDKPIQTLMKIADEL-GEIFKFEAPGR-----VTRYLSSQRLIKE 61
AAT62301.1                  Y-GPLGNLPLID---KDKPTLSFIKLAEEY-GPIFQIQTLSD-----TIIIVSGHELVAE 63
AAM54108.1                  L-PLVGNLLDVLTSDLDTDVDFLDRCHREH-GGIVALTFAGQ----RQVFASSHELVAR 66
EFQ83738.1                  RLRFGVDVRSVD---PSRPLMSMLQHARTL-GEIFEFQVF-DQ----KFVAVAGARLGAE 66
EFL88452.1                  Q-PFIGNMLSID---ANQPLQGLMENTREL-GPIFRMDMM-GT----PMVIASGYDIVNE 63
BAF89518.1                  Y-PVVGNLPELH--NAEGLVAAVDALHAKH-GEFFAFQVG-GK----RAYFCSDADIISE 149
CBI43648.1                  Y-GPLKNLPHLE---KEKLSQSLWKIAEEY-GPIFRFEFPSS-----VGVFVSGRELAEE 62
AEB22839.1                  F-GPLGNLPLLD---KDKPTMSLIKLAKEQ-GPIFQLHTPAG-----TIIIVSGHELVKE 62
EDT22025.1                  Y-GPLGNLPLID---KDKPTLSFIKLAEEY-GPIFRMQTLSD-----TIIIVSGHELVAE 63
AFH84458.1                  Y-GPLGNLPLID---KDKPTLSFIKLAEEY-GPIFRMQTLSD-----TIIIVSGHELVAE 71
ADP31197.1                  F-GPLGNLPLID---KDRPTLSLSKLADDEY-GPIFQLNTPAG-----TTIIVSGHELVEE 62
ACP19384.1                  Y-GPLGNLPLID---KDKPTLSFIKIAEEY-GPIFQIQTLSD-----TIIIVSGHELVAE 63
ADL27534.1                  Y-GPLGNLPLID---KDKPTLSFIKIAEEY-GPIFQIQTLSD-----TIIIVSGHELVAE 63
ACO29732.1                  Y-GPLGNLPLID---KDKPTLSFIKLAEEY-GPIFRIQTLSD-----TIIIVSGHELVAE 63
EDX65100.1                  Y-GPLGNLPLID---KDKPTLSFIKLAEEY-GPIFRIQTLSD-----TIIIVSGHELVAE 63
EEK61456.1                  Y-GPLGNLPLID---KDKPTLSFIKIAEEY-GPIFQIQTLSD-----TIIIVSGHELVAE 63
EEL16232.1                  Y-GPLGNLPLID---KDKPTLSFIKLAEEY-GPIFRMQTLSD-----TIIIVSGHELVAE 71
EDZ53094.1                  Y-GPLGNLPLID---KDKPTLSFIKIAEEY-GPIFQIQTLSD-----TIIIVSGHELVAE 63
EEL81346.1                  Y-GLLGNLPLID---KDKPTLSFIKIAEEY-GPIFQIQTLSD-----TIIIVSGHELVAE 77
EEL87105.1                  Y-GLLGNLPLID---KDKPTLSFIKIAEEY-GPIFRIQTLSD-----AIIVVSGHELVAE 77
EEL75761.1                  -----MVAE 4
ACK88541.1                  Y-GPLGNLPLID---KDKPTLSFIKLAEEY-GPIFQIQTLSD-----TIIIVSGHELVAE 63
EJQ05303.1                  Y-GPLGNLPLID---KDKPTLSFIKLAEEY-GPIFQIQTLSD-----TIIIVSGHELVAE 63
EEK50040.1                  Y-GPLGNLPLID---KDKPTLSFIKLAEEY-GPIFRIQTLSD-----AIIVVSGHELVAE 63
AAS42149.1                  Y-GPLGNLPLID---KDKPTLSFIKIAEEY-GPIFQIQTLSD-----TIIIVSGHELVAE 63
AAP10153.1                  Y-GPLGNLPLID---KDKPTLSFIKIAEEY-GPIFQIQTLSD-----TIIIVSGHELVAE 63
EEK83466.1                  Y-GPLGNLPLID---KDKPTLSFIKLAEEY-GPIFQIQTLSD-----TIIIVSGHELVAE 71

```

|            |                                                 |                    |
|------------|-------------------------------------------------|--------------------|
| ACK63698.1 | -----MVAE                                       | 4                  |
| EJS57156.1 | Y-GPLGNLPLID---KDKPTLSFIKIAEEY-GPIFQIQTLSD----- | TIIVVS GHELVAE 63  |
| EJS56605.1 | Y-GLLGNLPLID---KDKPTLSFIKIAEEY-GPIFRIQTLSD----- | AIIVVS GHELVAE 63  |
| EJS68951.1 | F-GPLGNVPLLD---KDKPLLSFIKLAEEY-GPIFQLQTPGG----- | TAIIVS GHELVEE 62  |
| EJQ10567.1 | Y-GPLGNLPLID---KDKPTLSFIKIAEEY-GPIFQIQTLSD----- | TIIVVS GHELVAE 63  |
| EJQ13433.1 | Y-GLLGNLPLID---KDKPTLSFIKIAEEY-GPIFRIQTLSD----- | TIIVVS GHELVAE 63  |
| EJQ20399.1 | Y-GPLGNLPLID---KDKPTLSFIKIAEEY-GPIFQIQTLSD----- | TIIVVS GHELVAE 63  |
| EJQ30236.1 | Y-GPLGNLPLID---KDKPTLSFIKIAEEY-GPIFQIQTLSD----- | TIIVVS GHELVAE 63  |
| EJQ51278.1 | F-GPLGNVPLLD---KDKPLLSFIKLAEEY-GPIFQLQTPGG----- | TAIIVS GYELVEE 62  |
| EEL10858.1 | Y-GPLGNLPLID---KDKPTLSFIKIAEEY-GPIFQIQTLSD----- | TIIVVS GHELVAE 63  |
| EEL05393.1 | Y-GLLGNLPLID---KDKPTLSFIKIAEEY-GPIFRIQTLSD----- | TIIVVS GHELVAE 77  |
| EEK94080.1 | Y-GPLGNLPLID---KDKPTLSFIKIAEEY-GPIFQIQTLSD----- | TIIVVS GHELVAE 66  |
| EEK99882.1 | Y-GPLGNLPLID---KDKPTLSFIKLAEEY-GPIFQIQTLSD----- | TIIVVS GHELVAE 66  |
| EEK55784.1 | Y-GPLGNLPLID---KDKPTLSFIKLAEEY-GPIFRIQTLSD----- | TIIVVS GHELVAE 71  |
| ADK05784.1 | Y-GPLGNLPLID---KDKPTLSFIKLAEEY-GPIFQIQTLSD----- | TIIVVS GHELVAE 63  |
| AAU17340.1 | Y-GPLGNLPLID---KDKPTLSFIKIAEEY-GPIFRMQTLSD----- | AIIVVS GHELVAE 63  |
| EEL64394.1 | Y-GPLGNLPLID---KDKPTLSFIKIAEEY-GPIFQIQTLSD----- | TIIVVS GHELVAE 63  |
| AEW56259.1 | Y-GPLGNLPLID---KDKPTLSFIKLAEEY-GPIFRIQTLSD----- | TIIVVS GHELVAE 63  |
| AFQ11690.1 | Y-GPLGNLPLID---KDKPTLSFIKIAEEY-GPIFRMQTLSD----- | TIIVVS GHELVAE 63  |
| EAL16831.1 | Y-GPLGNLPLID---KDKPTLSFIKIAEEY-GPIFQIQTLSD----- | TIIVVS GHELVAE 63  |
| ACK94296.1 | Y-GPLGNLPLID---KDKPTLSFIKLAEEY-GPIFRIQTLSD----- | AIIVVS GHELVAE 63  |
| EDZ58760.1 | Y-GPLGNLPLID---KDKPTLSFIKLAEEY-GPIFQIQTLSD----- | TIIVVS GHELVAE 63  |
| EJV84218.1 | Y-GLLGNLPLID---KDKPTLSFIKIAEEY-GPIFRIQTLSD----- | TIIVVS GHELVAE 63  |
| EJQ69212.1 | Y-GLLGNLPLID---KDKPTLSFIKIAEEY-GPIFRIQTLSD----- | TIIVVS GHELVAE 63  |
| EJQ80339.1 | Y-GPLGNLPLID---KDKPTLSFIKLAEEY-GPIFRIQTLSD----- | AIIVVS GHELVAE 63  |
| EJV81602.1 | Y-GPLGNLPLID---KDKPTLSFIKIAEEY-GPIFQIQTLSD----- | TIIVVS GHELVAE 63  |
| EJQ95474.1 | Y-GPLGNLPLID---KDKPTLSFIKLAEEY-GPIFQIQTLSD----- | TIIVVS GHELVAE 63  |
| EEK44229.1 | Y-GPLGNLPLID---KDKPTLSFIKLAEEY-GPIFQIQTLSD----- | TIIVVS GHELVAE 71  |
| EEK88560.1 | Y-GPLGNLPLID---KDKPTLSFIKIAEEY-GPIFQIQTLSD----- | TIIVVS GHELVAE 63  |
| EJR07451.1 | Y-GPLGNLPLID---KDKPTLSFIKLAEEY-GPIFRIQTLSD----- | AIIVVS GHELVAE 63  |
| EJR16542.1 | Y-GPLGNLPLID---KDKPTLSFIKLAEEY-GPIFQIQTLSD----- | TIIVVS GHELVAE 63  |
| BAL18840.1 | Y-GPLGNLPLID---KDKPTLSFIKLAEEY-GPIFQIQTLSD----- | TIIVVS GHELVAE 63  |
| EDX69960.1 | Y-GPLGNLPLID---KDKPTLSFIKLAEEY-GPIFRMQTLSD----- | TIIVVS GHELVAE 63  |
| ACM13462.1 | Y-GPLGNLPLID---KDKPTLSFIKLAEEY-GPIFQIQTLSD----- | TIIVVS GHEL VVE 63 |
| EEK75631.1 | Y-GPLGNLPLID---KDKPTLSFIKLAEEY-GPIFRIQTLSD----- | TIIVVS GHELVAE 63  |
| EEL25491.1 | -----MVAE                                       | 4                  |
| EEL21990.1 | Y-GPLGNLPLID---KDKPTLSFIKIAEEY-GPIFQIQTLSD----- | TIIVVS GHELVAE 71  |
| EEL33825.1 | Y-GPLGNLPLID---KDKPTLSFIKIAEEY-GPIFQIQTLSD----- | TIIVVS GHELVAE 71  |

|                        |                                                               |     |
|------------------------|---------------------------------------------------------------|-----|
| EEL44933.1             | Y-GPLGNLPLID---KDKPTLSFIKLAEEY-GPIFRMQTLSD-----TIIVVSHELVAE   | 71  |
| EEL50167.1             | F-GPLGNVPLLD---KDKPLLSFIKLAEEY-GPIFRLQTPGS-----TAIIVSGHELVAE  | 141 |
| EJR22930.1             | Y-GPLGNLPLIN---KDKPTLSFIKLAEEY-GPIFRIQTLSD-----AIIVVSHELVAE   | 63  |
| EJP91231.1             | Y-GPLGNLPLID---KDKPTLSFIKLAEEY-GPIFRIQTLSD-----AIIVVSHELVAE   | 63  |
| EJR37623.1             | Y-GPLGNLPLID---KDKPTLSFIKIAEEY-GPIFQIQTLSD-----TIIVVSHELVAE   | 63  |
| EJR50635.1             | Y-GPLGNLPLID---KDKPTLSFIKLAEEY-GPIFQIQTLSD-----TIIVVSHELVAE   | 63  |
| EJR64551.1             | Y-GPLGNLPLID---KDKPTLSFIKIAEEY-GPIFQIQTLSD-----TIIVVSHELVAE   | 63  |
| EJR75620.1             | Y-GPLGNLPLID---KDKPTLSFIKIAEEY-GPIFQIQTLSD-----TIIVVSHELVAE   | 63  |
| EJR82049.1             | Y-GPLGNLPLIN---KDKPTLSFIKLAEEY-GPIFRIQTLSD-----AIIVVSHELVAE   | 63  |
| EJR83659.1             | Y-GPLGNLPLID---KDKPTLSFIKIAEEY-GPIFQIQTLSD-----TIIVVSHELVAE   | 63  |
| EJR91135.1             | F-GPLGNLPLIN---KNSPTLSMAKIFDEY-GPIFRFEAFGN-----SRIMICDPELVAD  | 62  |
| EJR97241.1             | Y-GPLGNLPLID---KDKPTLSFIKIAEEY-GPIFQIQTLSD-----TIIVVSHELVAE   | 63  |
| EJS05852.1             | Y-GLLGNLPLID---KDKPTLSFIKIAEEY-GPIFRIQTLSD-----TIIVVSHELVAE   | 63  |
| EDX58768.1             | Y-GPLGNLPLID---KDKPTLSFIKLAEEY-GPIFRMQTLSD-----TIIVVSHELVAE   | 63  |
| AAU24352.1             | Y-GPLGNLPLLD---KNRVSQSLWKIADEM-GPIFQFKFADA-----IGVSVSHELVAE   | 62  |
| ABY44122.1             | Y-GLLGNLPLID---KDKPTLSFIKIAEEY-GPIFRIQTLSD-----TIIVVSHELVAE   | 63  |
| EDW23201.1             | Y-GPFKNIPHIK---KGELSQTFWRLADEL-GPIFQFEFSKA-----TSIFVSNHELVAE  | 62  |
| ABV62358.1             | Y-GPFKNIPHIK---KGELSQTFWRLADEL-GPIFQFEFSKA-----TSIFVSSHELVAE  | 62  |
| EIF12263.1             | F-GPLGNLPLLD---KDKPTMSLIKLANEQ-GPIFQLHTPAG-----AIIVVSHELVAE   | 62  |
| EIF14027.1             | Y-GPLKLNPHLE---KEKLSQSLWKIAEEY-GPIFRFEFPSS-----VGVFVSGRELAAE  | 62  |
| EHL75405.1             | Y-GPLGNLPLID---KDKPTLSFIKIAEEY-GPIFQIQTLSD-----TIIVVSHELVAE   | 63  |
| EJD67577.1             | F-GPLGNLPLLD---KDKPTMSLIKLANEQ-GPIFQLHTPAG-----AIIVVSHELVAE   | 62  |
| EJD68347.1             | Y-GPLKLNPHLE---KEKLSQSLWKIAEEY-GPIFRFEFPSS-----VGVFVSGRELAAE  | 62  |
| EFV73436.1             | Y-GPLGNLPLLD---KNRVSQSLWKIADEM-GPIFQFKFADA-----IGVSVSHELVAE   | 76  |
| CBY93692.1             | Y-GPLGNLPLID---KDKPTLSFIKLAEEY-GPIFQIQTLSD-----TIIVVSHELVAE   | 63  |
| AFI27355.1             | F-GPLGNLPLID---KDKPTLSLIKLAEEQ-GPIFQIHTPAG-----TTIVVSHELVAE   | 62  |
| AFI29229.1             | Y-GPLKLNPHLE---KEQLSQSLWRLADEL-GPIFRFDFFPGV-----SSVSVSGHNLVTE | 62  |
| EIL85422.1             | Y-GPLKNIPIK---KGELSQSFWRRLADEL-GGIYQFEFSDI-----TGVFVSSHELVAE  | 62  |
| ADV93500.1             | Y-GPLKLNPHLE---KEQLSQSLWRIADEL-GPIFRFDFFPGV-----SSVSVSGHNLVAE | 62  |
| ADV95715.1             | F-GPLGNLPLID---KDKPTLSLIKLAEEQ-GPIFQIHTPAG-----TTIVVSHELVAE   | 62  |
| BAI84248.1             | F-GPLGNLPLID---KDKPTLSLIKLAEEQ-GPIFQIHTPAG-----TTIVVSHELVAE   | 62  |
| EFG90288.1             | Y-GPLKLNPHLE---KEQLSQSLWRIADEL-GPIFRFDFFPGV-----SSVSVSGHNLVAE | 62  |
| EFG91781.1             | Y-GPLGNLPLID---KDKPTLSLIKLAEEQ-GPIFQIHTPAG-----TTIVVSHELVAE   | 62  |
| AEP85668.1             | Y-GPLGNLPLID---KDKPTLSLIKLAEEQ-GPIFQIHTPAG-----TTIVVSHELVAE   | 62  |
| AEP87558.1             | Y-GPLKLNPHLE---KEQLSQSLWRIADEL-GPIFRFDFFPGV-----SSVSVSGHNLVAE | 62  |
| sp 008336.1 CYPB_BACSU | Y-GPLKLNPHLE---KEQLSQSLWRIADEL-GPIFRFDFFPGV-----SSVSVSGHNLVAE | 62  |
| sp 008394.1 CYPD_BACSU | F-GPLGNLPLID---KDKPTLSLIKLAEEQ-GPIFQIHTPAG-----TTIVVSHELVAE   | 62  |
| AEP89812.1             | F-GPLGNLPLID---KDKPTLSLIKLAEEQ-GPIFQIHTPAG-----TTIVVSHELVAE   | 62  |

|            |                                                                |    |
|------------|----------------------------------------------------------------|----|
| AEP91702.1 | Y-GPLKNLPHLE---KEQLSQSLWRIADEL-GPIFRFDFFPGV-----SSV FVSGHNLVAE | 62 |
| EHA31094.1 | Y-GPLKNLPHLE---KEQLSQSLWRIADEL-GPIFRFDFFPGV-----SSV FVSGHNLVAE | 64 |
| ADH07708.1 | Y-GPLGNLPLID---KDKPTLSFIKIAEEY-GPIFQIQTLSD-----TII VVSGHELVAE  | 63 |
| EEM28177.1 | Y-GPLGNLPLID---KDKPTLSFIKIAEEY-GPIFQIQTLSD-----TII VVSGHELVAE  | 63 |
| AFQ14162.1 | Y-GPLGNLPLID---KDKPTLSFIKLAEEY-GPIFRIQTLSD-----AII VVSGHELVAE  | 63 |
| EEM95517.1 | Y-GPLGNLPLID---KDKPTLSFIKLAEEY-GPIFRIQTLSD-----TII VVSGHELVAE  | 63 |
| EEN02344.1 | Y-GPLGNLPLID---KDKPTLSFIKLAEEY-GPIFRIQTLSD-----AII VVSGHELVAE  | 63 |
| AFU13781.1 | Y-GPLGNLPLID---KDKPTLSFIKIAEEY-GPIFQIQTLSD-----TII VVSGHELVAE  | 71 |
| EEM70897.1 | Y-GPLGNLPLID---KDKPTLSFIKLAEEY-GPIFQIQTLSD-----TII VVSGHELVAE  | 71 |
| ADY22413.1 | Y-GPLGNLPLID---KDKPTLSFIKLAEEY-GPIFQIQTLSD-----TII VVSGHELVAE  | 63 |
| EEM82895.1 | Y-GPLGNLPLIN---KDKPTLSFIKLAEEY-GPIFRIQTLSD-----AII VVSGHELVAE  | 63 |
| EEM52818.1 | Y-GPLGNLPLID---KDKPTLSFIKIAEEY-GPIFQIQTLSD-----TII VVSGHELVAE  | 63 |
| EEM59126.1 | Y-GPLGNLPLID---KDKPTLSFIKLAEEY-GPIFRIQTLSD-----TII VVSGHELVAE  | 71 |
| EEM47193.1 | -----MVAE                                                      | 4  |
| EEM76899.1 | Y-GPLGNLPLID---KDKPTLSFIKLAEEY-GPIFRMQTLSD-----TII VVSGHELVAE  | 71 |
| EEM88909.1 | Y-GPLGNLPLID---KDKPTLSFIKLAEEY-GPIFQIQTLSD-----TII VVSGHELVAE  | 71 |
| EEM38196.1 | Y-GPLGNLPLID---KDKPTLSFIKLAEEY-GPIFRIQTLSD-----AII VVSGHELVAE  | 63 |
| EEM21858.1 | Y-GPLGNLPLID---KDKPTLSFIKLAEEY-GPIFQIQTLSD-----TII VVSGHELVAE  | 66 |
| ABK86139.1 | Y-GPLGNLPLID---KDKPTLSFIKLAEEY-GPIFRIQTLSD-----TII VVSGHELVAE  | 71 |
| EJQ37805.1 | Y-GPLGNLPLID---KDKPTLSFIKIAEEY-GPIFQIQTLSD-----TII VVSGHELVAE  | 63 |
| CCF04242.1 | F-GPLGNLPLLD---KDKPTMSLIKLANEQ-GPIFQLHTPAG-----AII VVSGHELVAE  | 62 |
| CCF05972.1 | Y-GPLKNLPHLE---KEKLSQSLWKIAEEY-GPIFRFEFPSS-----VGV FVSGRELAEE  | 62 |
| ABS73124.1 | F-GPLGNLPLLD---KDKPTMSLIKLANEQ-GPIFQLHTPAG-----AII VVSGHELVAE  | 62 |
| ABS74786.1 | Y-GPLKNLPHLE---KEKLSQSLWKIAEEY-GPIFRFEFPSS-----VGV FVSGRELAEE  | 62 |
| EKE46398.1 | F-GPLGNLPLLD---KDKPTMSLIKLANEQ-GPIFQLHTPAG-----AII VVSGHELVAE  | 62 |
| EKE48022.1 | Y-GPLKNLPHLE---KEKLSQSLWKIAEEY-GPIFRFEFPSS-----VGV FVSGRELAEE  | 62 |
| CCG48683.1 | F-GPLGNLPLLD---KDKPTMSLIKLANEQ-GPIFQLHTPAG-----AII VVSGHELVAE  | 62 |
| AFJ60789.1 | F-GPLGNLPLLD---KDKPTMSLIKLANEQ-GPIFQLHTPAG-----AII VVSGHELVAE  | 69 |
| AFJ62808.1 | Y-GPLKNLPHLE---KEKLSQSLWKIAEEY-GPIFRFEFPSS-----VGV FVSGRELAEE  | 62 |
| EEK66903.1 | Y-GLLGNLPLID---KDKPTLSFIKIAEEY-GPIFQIQTLSD-----TII VVSGHELVAE  | 77 |
| EJQ52935.1 | Y-GLLGNLPLID---KDKPTLSFIKLAEEY-GPIFRIQTLSD-----TII VVSGHELVAE  | 63 |
| EJS69574.1 | Y-GPLGNLPLID---KDKPTLSFIKLAEEY-GPIFRIQTLSD-----AII VVSGHELVAE  | 63 |
| EJV63294.1 | Y-GPLGNLPLID---KDKPTLSFIKLAEEY-GPIFRIQTLSD-----AII VVSGHELVAE  | 63 |
| EKF35778.1 | Y-GPLKNIPLK---KGELSQTFWRLADDL-GPIFQFEFTGQ-----TSIFVSSHELVAE    | 62 |
| EGP08506.1 | K-PVVGNMMLSLD---STAPVQDLVRKSREL-GPIFWLDMM-GQ-----PLVIVSGFDLVDE | 65 |
| BAL78328.1 | K-PVVGNMMLSLD---SAAPVQHLTRLAKEL-GPIFWLDMM-GS-----PIVVVSGHDLVDE | 65 |
| BAC48147.1 | K-PVVGNMMLSLD---SAAPVQHLTRLAKEL-GPIFWLDMM-GS-----PIVVVSGHDLVDE | 65 |
| BAL12135.1 | K-PVVGNMMLSLD---SAAPVQHLTRLAKEL-GPIFWLDMM-GS-----PIVVVSGHDLVDE | 65 |

|            |                                                                 |     |
|------------|-----------------------------------------------------------------|-----|
| CCE00185.1 | R-PVVGNMLSLD---ANAPVQHLTRLAKEY-GPIFWLDMM-GS-----PIVIASGYDLVDE   | 65  |
| EIG57609.1 | K-PVVGNMLSLD---SAAPVQHLTRLAKEL-GPIFWLDMM-GS-----PIVVVSGHDLVDE   | 65  |
| EHR02046.1 | K-PVVGNMLSLD---SAAPVQHLTRLAKEL-GPIFWLDMM-GS-----PIVVVSGHDLVDE   | 65  |
| EJN11211.1 | K-PVVGNMLSLD---SAAPVQHLTRLAKEL-GPIFWLDMM-GS-----PIVVVSGHDLVDE   | 65  |
| CCF15606.1 | -----MVAE                                                       | 4   |
| CCF12687.1 | Y-GPLGNYPLID---KDTPTLSLCKLAEFF-GPIYRLTSLGS-----SSLVISGHKLAAE    | 62  |
| ABB05850.1 | K-PVIGHLMEVL---GPSPLAKMMDLARTY-GPVYWFVEF-GQ-----GYVVVSGQTLVDE   | 62  |
| EHP43606.1 | W-PLVGNLLQVT---PGKIGQHLLARSRAF-DGIFELDFA-GR-----RVAFVSDAALVGE   | 86  |
| ABF10339.1 | W-PIFGNLFQIT---PGEVQGHLLARSRHH-DGIFELDFA-GK-----RVPFVSSVALASE   | 68  |
| CAJ95800.1 | W-PLVGNLLQIT---PGALGQHLLARSRHH-DGIFELNFA-GR-----RVPFVTSVALASE   | 88  |
| AEI79937.1 | W-PLVGNLLQIT---PGALGQHLLARSRHH-DGIFELNFA-GR-----RVPFVTSVALASE   | 88  |
| AFD27790.1 | L-PVLGHLLAID---AQSPVQSLTRLLRDH-GPIAELRLP-GRRKGGRLIVVGSYALADE    | 64  |
| ABC62112.1 | K-PIVGNNAFTVD---SSRLIQSLMELAEY-GPIFQLEVM-GT-----PLVVFVSGADMVAE  | 65  |
| EAQ27850.1 | K-PLIGNALTVD---ASQQIQSLMELAEY-GPIFQLDMM-GT-----PIVVISGADLVAE    | 65  |
| EIT84377.1 | Y-GPLGNLPLID---KEHPTLSLWKMAEEQ-GPIFRMKSPAS-----QSIIIVSGHELARE   | 62  |
| CCG43686.1 | Y-GPLGNLPLIN---KEKPIQSFMKLADEF-GPLYQFQFPGR-----TSRFVSSAQFAAE    | 62  |
| ABX05160.1 | R-PIVGNVDPDIG---METPVQNLMKLAQHY-GPIFRVVSFP-NR-----SVLVVSSAELVAE | 65  |
| BAJ96920.1 | R-PLVGNAADID---PSARMENWLRLSKIY-GPIFHLSLP-QR-----NLIILSSQELVNE   | 60  |
| GAB96874.1 | R-PVIGTLYAMD---SHAPIQSSMALASEY-GEIFRHRIM-GRP---PLYMVSSQRLVDE    | 101 |
| EFH80345.1 | K-PLVGNLYSLD---HALPTLSMMDLAREL-GPIYQLEIP-GR-----RTVIVSGFELADE   | 66  |
| EFH88481.1 | ---PMGDMKEVH---PESAVRDLIKQAQRH-GPIFQLPLPDGT-----RRIVLSSFALVDE   | 58  |
| EAW32450.1 | KLPGIGHTHLID---AAEPVQSL LALSKNM-GEIYQLQLP-GG-----KLLVVSSQRLVDE  | 60  |
| EIZ82104.1 | L-PIVGNLPEID---PNAPVQSLMRLARAH-GPIYRLSLG-GR-----SLTVVSAQALVNE   | 62  |
| AEV70722.1 | ALPTWADVGRP---YALP---IDILGERH-GPLFYSDHN-GF-----RKLYACSAELVDE    | 68  |
| EFC41452.1 | H-FLVGNIFTVD---KKNPFPSFIELAKKF-DGIFKMNIL-GK-----QLVVVYSQELVNE   | 91  |
| ACV78954.1 | L-PIIGNALVSI---NPATAFTDLQRLADEL-GPIYALDMP-GYH---DQVVLTPDLFGE    | 63  |
| ACV78964.1 | L-PLLGNLFDID---THSPVDGFIAMAKEY-GPIYRLTLP-AG-----SRVMVSGADLVDQ   | 65  |
| ACV81379.1 | V-PILGNLLDLN---NPHPIDTLMWARQY-GPIYKLTVP-GT-----TRIVVSGADLMPD    | 65  |
| EIZ78677.1 | L-PIIGNLNLID---ADAPVQSLIRLADIH-GPIFRISGV-GQ-----SIIILSSQALVDD   | 60  |
| EJW15291.1 | Y-GPLGNVPQLN---PNTPILSFMNLAEQY-GEIYRMKLPFG-----TLHVVSgyELAKE    | 60  |
| EJW16173.1 | F-GLLGNLPQLN---LEAPVQSMVQLAEY-GPIFRIDLPGR-----SEIFISGHELVDK     | 64  |
| EHQ58913.1 | Y-GPLGNLPQLD---TEMPIQSFMKLAEY-GEFFRLKLPFG-----HLHIVSGYELVKE     | 60  |
| EHQ59900.1 | F-GPLGNLPLLD---LEAPLQSLVKLAYEY-GPIFRMDMPGR-----SEIFISGYELVED    | 62  |
| EHB66924.1 | Y-GPLGNLPLLD---SSAPVQSLVKIASEL-GPIFQFQYPGGR-----RELYVSGHEYVRD   | 62  |
| AFH60445.1 | F-GPLGNLPLNLN---TKEPVQSI VKIADEF-GPIFQDLPRG-----KSVYISSHELVD    | 62  |
| AEI42011.1 | F-GPLGNLPLNLN---TKEPVQSI VKIADEF-GPIFQDLPRG-----KSVYISSHELVD    | 62  |
| ADO57681.1 | Y-GPLGNLPLID---THAPVQSLVKLANEH-GPIFRMDLPEG-----TNIYISGHKLVD     | 62  |
| EGG32133.1 | Y-GPLGNLPLLD---SAAPVQSLVKVASEL-GPIFQFQYPGGR-----KELYVSGHEYVKD   | 63  |

|            |                                                                   |
|------------|-------------------------------------------------------------------|
| EGL17662.1 | Y-GPLGNLPLID---KESPLQSMMLADEL-GPIFKLEMPGR-----TQLLISSHELVD 63     |
| ACX65034.1 | Y-GPLGNLPLLD---SAAPVQSLVKVASEL-GPIFQFYPGGR-----KELYVSGHEYVKD 63   |
| ACT11327.1 | K-PVIGNLADVD---PRNSIDSLMKLAKTY-GPFFKMRI F-SD-----EFYVASSQELVNE 62 |
| AEA28016.1 | K-PVIGNALDIP---GDRTIQALMDLTRTY-GPIMRLKTP-VG-----DRYIVSGLEMVDD 67  |
| EFP68091.1 | L-PWLGNNLQLP---KDRLAQTLLETSRQFPQGLYQLDFA-GR-----RVPFVYSADLVAE 75  |
| EGY61507.1 | L-PWLGNNLQLP---KDRLAQTLLETSRQFPQGLYQLDFA-GR-----RVPFVYSADLVAE 75  |
| EIE85788.1 | L-PFVGNLYDMV----PNLIEGWIRQFEKY-GPVVEISLL-GK-----ILVGTNSPAVAEV 142 |
| EIE92534.1 | L-PFVGSLYEML----PNIAEGWMRQFDRF-GPLVEISLL-GK-----IIVGTNDPNIAEI 142 |
| BAE46296.1 | RLPLLGDLLTVD---SEKPIQKEMALASKL-GPIFEWKIV-NN-----RVTVVSGVDLVAE 116 |
| BAH31604.1 | RLPVLGDVLGIN---IRTPLQNSV SIGREL-GPIFERNVL-GN-----RFVFASGADMVAE 71 |
| EEN84644.1 | RLPVLGDVLGIN---IRTPLQNSV SIGREL-GPIFERNVL-GN-----RFVFASGADMVAE 71 |
| EEN88978.1 | RLPVLGDLLSVD---SVKPVQKEMVMASRL-GPIFERKIL-NH-----RLTVVSGVELVAE 156 |
| ABG96413.1 | RLPVVGDVFGIS---IRTPLQNSMEIGRKL-GPIFERNVL-GN-----RFVFASGADMVAE 103 |
| BAH52971.1 | RLPVFGDVFGIS---IRTPVQNSMEIGRQL-GPIFERNIL-GN-----KFVFASGADMVAE 70  |
| EHI44575.1 | RFPVVGDVFGIS---IRTPVQNSMEIGSRL-GPIFERNVL-GN-----RFVFASGADMVAE 105 |
| EID73168.1 | RLPVVGDVFGIS---VRTPVQNSMEIGRKL-GPIFERNVL-GN-----RFVFASGADMVAE 70  |
| EHK83749.1 | ----MGDLLSID---VAKPVQREMOMAQEL-GGIFERKIL-QH-----RLIVVSGADLVRE 47  |
| EJI96173.1 | RLPVVGDVFGIS---IRTPLQNSMEIGRKL-GPIFERNVL-GN-----RFVFASGADMVAE 70  |
| ABI79384.1 | RLPLLGDVLRLD---PKRPVQREMRFVEEL-GDVFEISII-GR-----RVVVVGGGDAAAA 99  |
| CAR47816.1 | RLPLLGDVLRLD---PQRPVQREAFVQEL-GDVFEISIL-GR-----KVIVVGGGDAAAA 101  |
| AEK26937.1 | RLPLVGDLLSID---VAKPVQREMOMAQEL-GGIFERKIL-QH-----RLIVVSGADLVRE 79  |
| ABE39056.1 | K-PVGNMLSLD---TTAPVQHVLRLAKEL-GPIFWLDMM-GA-----PLVIVSGYDLVDE 65   |
| ABD08340.1 | Q-PVGNMLSID---TKAPVQHVLRLAEEL-GPIFWLDMM-GA-----PIVIVSGYDLVDE 65   |
| CAM03474.1 | DVPVADVSGTGL---TATPTQQAMELARRH-GPVFRRRTR-EF-----QSLLVSDVDLVAE 60  |
| EJF54063.1 | Y-PIVKSVLSLD---IKRPVQSMMALAEKY-GGIYRLEVP-ND-----SLVIVSGLEYVQE 76  |
| AFC23737.1 | Y-PIVKSVLSLD---IKRPVQSMMALAEKY-GGIYRLEVP-ND-----SLVIVSGLEYVQE 64  |
| ADG98903.1 | RLPLLGDLLRLD---LAKPTQSLVPLSHEA-GPVFEQVFF-GF-----PLRVVAGAREIEE 71  |
| EGI54680.1 | Y-PLIGNIAELD---PKAPVQSLMRLAREH-GPLFRIEMF-GR-----GLVIVGSQALTAE 59  |
| AEW97204.1 | PVPVADISDTGF---GTTPIQQAMALAREH-GPVFRRRFG-TF-----ESLLVGSVDAVTE 77  |
| CAJ88567.1 | RLPLLGDVVGAS---RSTPMQDSLRYARRL-GPIFRRRAF-GN-----EFVFWGAGLAAD 86   |
| BAC68285.1 | V-PLFGHTPQIP---STNPVEYFGKLSKQFPEGGLYGMEIA-GI-----EQVFVWDPDLVAE 68 |
| BAC75137.1 | RLPVVGDVLGVN---VRTPVQDSLRIGRRL-GPVFRRKAF-GK-----EIVFVGGADLAAE 82  |
| EDY51256.1 | -MPLFGHALSVP--AGG-FTEHTLREARAL-GPLFNLRF- DT-----DCWMVSGPELVAE 50  |
| EFG07822.1 | RLPLFGHALSVP--AGG-FTEHTLREARAL-GPLFNLRF- DT-----DCWMVSGPELVAE 82  |
| EHN78335.1 | RLPLLGDVVGAS---RRTPMQDSLRYARRL-GPIFRRRVF-GK-----EFVFWGASLAAD 86   |
| CAB66201.1 | RLPLLGDVVGAS---RRTPMQDSLRYARRL-GPIFRRRAF-GK-----EFVFWGAALAAAD 86  |
| EGG48117.1 | RLPLAGDVLGAD---VRRPLQDAMRHGRLL-GPIYRRKVF-RR-----EFVFWWGGRYAAD 93  |
| EFL20831.1 | ALPLVGHAFSVP--SGADGLLHVMKEAKEL-GPLFRLRIF-GN-----DINFVSGLDLVTE 73  |

|            |                                                                 |     |
|------------|-----------------------------------------------------------------|-----|
| EFL28515.1 | GVPLVDISA-QT---NNTPIQQAMELTRAH-GPVLRRRLH-GT-----DMLFVSDPDLVAE   | 68  |
| AEY93311.1 | RVPLLGDVLGVD---RHRPLQDSMRLAREL-GPIFRRRAF-GK-----EFVFWGARLVAD    | 85  |
| AEY93321.1 | GVPVVDITASGP---GRTPIQQTMEMLREH-GPVLVRRRLH-GR-----DVMFVADANLVAD  | 66  |
| EFD71156.1 | RLPLLGDVVGAS---RRTPMQDSLRYARRL-GPIFRRRAF-GK-----EFVFWGAALAAD    | 86  |
| CBG67789.1 | ALPLVGHAFDIP--GGADGLLHLMKEAREL-GPLFKLRVF-GN-----EINIASGLDLVTE   | 68  |
| CBG68112.1 | RIPLLGDVLGTN---VRTPVQESTRLGQRL-GPIFRRKAF-GK-----EIVFVGGAEELAAE  | 82  |
| EFL10082.1 | RLPVIGDLLGAS---FRTPLQGTMRAGEKL-GPIFTRKFF-GL-----EIVFVTGIDLVT    | 102 |
| EFF88741.1 | GLPLVGHALTLP--GGADFLHHLMKVKEKEL-GPIYQLRTF-GK-----ELVVVGGGLDLVTE | 68  |
| EDY58112.1 | RLPLLGDVLGVD---RATPLQDSLRFARRL-GPIFRRRAF-NR-----EFVFTWGAELVAD   | 82  |
| EFL36674.1 | RIPLLGDVVGVN---RRTPLQDSLRYARRL-GPVFRRKAF-GK-----EFVFWGARHTAD    | 95  |
| EFL36680.1 | GVPVADITATGP---GGAPIQQAMDLMREH-GPVFVRRLY-GR-----DTLFVGDLDLVAE   | 116 |
| EFE65335.1 | RLPLVGDVLGAS---RSTPVQDSLKYARRL-GPIFRRNAF-GK-----EFVFTWGAGLVTD   | 83  |
| EGX54696.1 | RVPLLGDVVGAG---RRTPLQDSLRFARKL-GPIFRRRAF-GK-----EFVFWGAGLAAD    | 83  |
| ACZ89135.1 | R-PIVGNAPRID---SGAPVQSMMRLAADL-GPVFRMSVP-GR-----EMLILSSRELVAE   | 65  |
| ABD83817.1 | R-PVVGNMLSLD---SAAPVQDLTRLAKEL-GPIFWLDMM-GA-----PIVIVSGYTLVDE   | 65  |
| ADU39615.1 | K-PFVGNLLSIG---SDSPVLDMWKIAQDL-GGIYWLDMP-GM-----PVIVVSSPALVDE   | 65  |
| EJL72014.1 | K-PFVGNLLSIG---SDSPVLDMWKIAQDL-GGIYWLDMP-GM-----PVIVVSSPELVDE   | 65  |

sp|P14779.2|CPXB\_PRIM2

|            |                                                                |     |
|------------|----------------------------------------------------------------|-----|
| ADF40088.1 | ACDE-SRFDKNLSQ-ALK----FVR-DFAGDGLFTSWTHEKNWKKAHNILLPSFSQQAMK   | 114 |
| ADE70259.1 | ACDE-SRFDKNLSQ-ALK----FVR-DFTGDGLFTSWTHEKNWKKAHNILLPSFSQQAMK   | 114 |
| AEN88827.1 | ACDE-SRFDKNLSQ-ALK----FVR-DFAGDGLFTSWTHEKNWKKAHNILLPSFSQQAMK   | 114 |
| KFN05180.1 | ACDE-SRFDKNLSQ-ALK----FVR-DFAGDGLFTSWTHEKNWKKAHNILLPSFSQQAMK   | 114 |
| ACZ37122.1 | ACDE-SRFDKNLSQ-ALK----FVR-DFAGDGLFTSWTHEKNWKKAHNILLPSFSQQAMK   | 114 |
| ADA57055.1 | ACDE-SRFDKNLSQ-ALK----FVR-DFAGDGLFTSWTHEKNWKKAHNILLPSFSQQAMK   | 114 |
| ADA57058.1 | ACDE-SRFDKNLSQ-ALK----FVR-DFAGDGLFTSWTHEKNWKKAHNILLPSFSQQAMK   | 114 |
| ADA57059.1 | ACDE-SRFDKNLSQ-ALK----FVR-DFAGDGLFTSWTHEKNWKKAHNILLPSFSQQAMK   | 114 |
| ADA57061.1 | ACDE-SRFDKNLSQ-ALK----FVR-DFAGDGLFTSWTHEKNWKKAHNILLPSFSQQAMK   | 114 |
| ADA57062.1 | ACDE-SRFDKNLSQ-ALK----FVR-DFAGDGLFTSWTHEKNWKKAHNILLPSFSQQAMK   | 114 |
| ADA57068.1 | ACDE-SRFDKNLSQ-ALK----FVR-DFAGDGLFTSWTHEKNWKKAHNILLPSFSQQAMK   | 114 |
| AAT62301.1 | VCDE-TRFDKSIIEG-ALA----KVR-AFAGDGLFTSETDEPNWKKAHNILLMPTFSQRAMK | 116 |
| AAM54108.1 | MCSD-PSWGKAV-HPALE----QVR-DFAGDGLFTARGDEPNWGKAHRLLLMPAFGPTAMR  | 119 |
| EFQ83738.1 | LCDE-SRFGKDL-PPALT----SLR-EFAGDGLFTAFTTEERNWGLAHDLLRPAFTRPAMQ  | 119 |
| EFL88452.1 | LCDE-ARFDKAV-RGSLR----RIR-AVGGDALFTANTSDDNWQKAHRILLPTFAGSAMK   | 116 |
| BAF89518.1 | MCAA-PDVFAKL-VEGRGGLGNLAE-KSVGSALFTASDNDPLWHQAHRILAPAFGATALK   | 206 |
| CBI43648.1 | VCDE-KRFDKNLSK-ALL----KVR-EFGGDGLFTSWTHEKNWQKAHRILLPSFSQKAMK   | 115 |
| AEB22839.1 | VCDE-ERFDKSIIEG-ALE----KVR-AFSGDGLFTSWTHEPNWRKAHNILLMPTFSKRAMK | 115 |
| EDT22025.1 | VCDE-TRFDKSIIEG-ALA----KVR-AFAGDGLFTSETQEPNWQKAHNILLMPTFSQRAMK | 116 |
| AFH84458.1 | VCDE-TRFDKSIIEG-ALA----KVR-AFAGDGLFTSETQEPNWQKAHNILLMPTFSQRAMK | 124 |
| ADP31197.1 | ICDE-SRFDKSIIEG-ALE----KVR-AFSGDGLFTSWTHEPNWRKAHNILLMPTFSQRAMK | 115 |
| ACP19384.1 | VCDE-TRFDKSIIEG-ALA----KVR-AFAGDGLFTSETHEPNWKKAHNILLMPTFSQRAMK | 116 |
| ADL27534.1 | VCDE-TRFDKSIIEG-ALA----KVR-AFAGDGLFTSETHEPNWKKAHNILLMPTFSQRAMK | 116 |
| ACO29732.1 | VCDE-TRFDKSIIEG-ALA----KVR-AFAGDGLFTSETQEPNWQKAHNILLMPTFSQRAMK | 116 |
| EDX65100.1 | VCDE-TRFDKSIIEG-ALA----KVR-AFAGDGLFTSETQEPNWQKAHNILLMPTFSQRAMK | 116 |
| EEK61456.1 | VCDE-TRFDKSIIEG-ALA----KVR-AFAGDGLFTSETHEPNWKKAHNILLMPTFSQRAMK | 116 |
| EEL16232.1 | VCDE-TRFDKSIIEG-ALA----KVR-AFAGDGLFTSETQEPNWQKAHNILLMPTFSQRAMK | 124 |
| EDZ53094.1 | VCDE-TRFDKSIIEG-ALA----KVR-AFAGDGLFTSETHEPNWKKAHNILLMPTFSQRAMK | 116 |
| EEL81346.1 | VCDE-TRFDKSIIEG-ALA----KVR-AFAGDGLFTSETHEPNWKKAHNILLMPTFSQRAMK | 130 |
| EEL87105.1 | VCDE-TRFDKSIDG-ALA----KVR-AFAGDGLFTSETDEPNWKKAHNILLMPTFSQRAMK  | 130 |
| EEL75761.1 | VCDE-TRFDKSIIEG-ALA----KVR-AFAGDGLFTSETHEPNWKKAHNILLMPTFSQRAMK | 57  |
| ACK88541.1 | VCDE-TRFDKSIIEG-ALA----KVR-AFAGDGLFTSETQEPNWQKAHNILLMPTFSQRAMK | 116 |
| EJQ05303.1 | VCDE-TRFDKSIIEG-ALA----KVR-AFAGDGLFTSETDEPNWKKAHNILLMPTFSQRAMK | 116 |
| EEK50040.1 | VCDE-TRFDKSIDG-ALA----KVR-AFAGDGLFTSETHEPNWKKAHNILLMPTFSQRAMK  | 116 |
| AAS42149.1 | VCDE-TRFDKSIIEG-ALA----KVR-AFAGDGLFTSETQEPNWQKAHNILLMPTFSQRAMK | 116 |
| AAP10153.1 | VCDE-TRFDKSIIEG-ALA----KVR-AFAGDGLFTSETHEPNWKKAHNILLMPTFSQRAMK | 116 |
| EEK83466.1 | VCDE-TRFDKSIIEG-ALA----KVR-AFAGDGLFTSETHEPNWKKAHNILLMPTFSQRAMK | 124 |

|            |                                                               |     |
|------------|---------------------------------------------------------------|-----|
| ACK63698.1 | VCDE-TRFDKSIEG-ALA-----KVR-AFAGDGLFTSETHEPNWKKAHNILMPTFSQRAMK | 57  |
| EJS57156.1 | VCDE-TRFDKSIDG-ALA-----KVR-AFAGDGLFTSETHEPNWKKAHNILMPTFSQRAMK | 116 |
| EJS56605.1 | VCDE-TRFDKSIDG-ALA-----KVR-VFAGDGLFTSETDEPNWKKAHNILMPTFSQRAMK | 116 |
| EJS68951.1 | VCDQ-SRFDKSVEG-PLA-----KVR-PFAGDGLFTSGTHEPNWRKAHNILTPTFSQRAMK | 115 |
| EJQ10567.1 | VCDE-TRFDKSIEG-ALA-----KVR-AFAGDGLFTSETHEPNWKKAHNILMPTFSQRAMK | 116 |
| EJQ13433.1 | VCDE-TRFDKSIEG-ALA-----KVR-AFAGDGLFTSETHEPNWKKAHNILMPTFSQRAMK | 116 |
| EJQ20399.1 | VCDE-TRFDKSIEG-ALA-----KVR-AFAGDGLFTSETHEPNWKKAHNILMPTFSQRAMK | 116 |
| EJQ30236.1 | VCDE-TRFDKSIEG-ALA-----KVR-AFAGDGLFTSETHEPNWKKAHNILMPTFSQRAMK | 116 |
| EJQ51278.1 | VCDQ-SRFDKSVEG-PLA-----KVR-PFAGDGLFTSGTHEPNWRKAHNILTPTFSQRAMK | 115 |
| EEL10858.1 | VCDE-TRFDKSIEG-ALA-----KVR-AFAGDGLFTSETHEPNWKKAHNILMPTFSQRAMK | 116 |
| EEL05393.1 | VCDE-TRFDKSIEG-ALA-----KVR-AFAGDGLFTSETHEPNWKKAHNILMPTFSQRAMK | 130 |
| EEK94080.1 | VCDE-TRFDKSIEG-ALA-----KVR-AFAGDGLFTSETHEPNWKKAHNILMPTFSQRAMK | 119 |
| EEK99882.1 | VCDE-TRFDKSIEG-ALA-----KVR-AFAGDGLFTSETDEPNWKKAHNILMPTFSQRAMK | 119 |
| EEK55784.1 | VCDE-TRFDKSIEG-ALA-----KVR-AFAGDGLFTSETQEPNWQKAHNILMPTFSQRAMK | 124 |
| ADK05784.1 | VCDE-TRFDKSIEG-ALA-----KVR-AFAGDGLFTSETDEPNWKKAHNILMPTFSQRAMK | 116 |
| AAU17340.1 | VCDE-TRFDKSIEG-ALA-----KVR-AFAGDGLFTSETDEPNWKKAHNILMPTFSQRAMK | 116 |
| EEL64394.1 | VCDE-TRFDKSIEG-ALA-----KVR-AFAGDGLFTSETHEPNWKKAHNILMPTFSQRAMK | 116 |
| AEW56259.1 | VCDE-TRFDKSIEG-ALA-----KVR-AFAGDGLFTSETQEPNWQKAHNILMPTFSQRAMK | 116 |
| AFQ11690.1 | VCDE-TRFDKSIEG-ALA-----KVR-AFAGDGLFTSETQEPNWKKAHNILMPTFSQRAMK | 116 |
| EAL16831.1 | VCDE-TRFDKSIEG-ALA-----KVR-AFAGDGLFTSETHEPNWKKAHNILMPTFSQRAMK | 116 |
| ACK94296.1 | VCDE-TRFDKSIEG-ALA-----KVR-AFAGDGLFTSETHEPNWKKAHNILMPTFSQRAMK | 116 |
| EDZ58760.1 | VCDE-TRFDKSIEG-ALA-----KVR-AFAGDGLFTSETDEPNWKKAHNILMPTFSQRAMK | 116 |
| EJV84218.1 | VCDE-TRFDKSIEG-ALA-----KVR-AFAGDGLFTSETHEPNWKKAHNILMPTFSQRAMK | 116 |
| EJQ69212.1 | VCDE-TRFDKSIEG-ALA-----KVR-AFAGDGLFTSETHEPNWKKAHNILMPTFSQRAMK | 116 |
| EJQ80339.1 | VCDE-TRFDKSIDG-ALA-----KVR-AFAGDGLFTSETHEPNWKKAHNILMPTFSQRAMK | 116 |
| EJV81602.1 | VCDE-TRFDKSIDG-ALA-----KVR-AFAGDGLFTSETHEPNWKKAHNILMPTFSQRAMK | 116 |
| EJQ95474.1 | VCDE-TRFDKSIEG-ALA-----KVR-AFAGDGLFTSETDEPNWKKAHNILMPTFSQRAMK | 116 |
| EEK44229.1 | VCDE-TRFDKSIEG-ALA-----KVR-AFAGDGLFTSETHEPNWKKAHNILMPTFSQRAMK | 124 |
| EEK88560.1 | VCDE-TRFDKSIEG-ALA-----KVR-AFAGDGLFTSETHEPNWKKAHNILMPTFSQRAMK | 116 |
| EJR07451.1 | VCDE-TRFDKSIEG-ALA-----KVR-AFAGDGLFTSETHEPNWKKAHNILMPTFSQRAMK | 116 |
| EJR16542.1 | VCDE-TRFDKSIEG-ALA-----KVR-AFAGDGLFTSETDEPNWKKAHNILMPTFSQRAMK | 116 |
| BAL18840.1 | VCDE-TRFDKSIEG-ALA-----KVR-AFAGDGLFTSETDEPNWKKAHNILMPTFSQRAMK | 116 |
| EDX69960.1 | VCDE-TRFDKSIEG-ALA-----KVR-AFAGDGLFTSETQEPNWQKAHNILMPTFSQRAMK | 116 |
| ACM13462.1 | VCDE-TRFDKSIEG-ALA-----KVR-AFAGDGLFTSETDEPNWKKAHNILMPTFSQRAMK | 116 |
| EEK75631.1 | VCDE-TRFDKSIDG-ALA-----KVR-AFAGDGLFTSETHEPNWKKAHNILMPTFSQRAMK | 116 |
| EEL25491.1 | VCDE-TRFDKSIEG-ALA-----KVR-AFAGDGLFTSETHEPNWKKAHNILMPTFSQRAMK | 57  |
| EEL21990.1 | VCDE-TRFDKSIDG-ALA-----KVR-AFAGDGLFTSETDEPNWKKAHNILMPTFSQRAMK | 124 |
| EEL33825.1 | VCDE-TRFDKSIDG-ALA-----KVR-AFAGDGLFTSETDEPNWKKAHNILMPTFSQRAMK | 124 |

|                        |                         |                                        |     |
|------------------------|-------------------------|----------------------------------------|-----|
| EEL44933.1             | VCDE-TRFDKSIEG-ALA----  | KVR-AFAGDGLFTSETQEPNWQKAHNILMPTFSQRAMK | 124 |
| EEL50167.1             | VCDQ-SRFDKSVEG-PLA----  | KVR-PFAGDGLFTSGTHEPNWSKAHNILMPTFSQRAMK | 194 |
| EJR22930.1             | VCDE-TRFDKSIEG-ALA----  | KVR-AFAGDGLFTSETHEPNWKKAHNILMPTFSQRAMK | 116 |
| EJP91231.1             | VCDE-TRFDKSIEG-ALA----  | KVR-AFAGDGLFTSETHEPNWKKAHNILMPTFSQRAMK | 116 |
| EJR37623.1             | VCDE-TRFDKSIEG-ALA----  | KVR-AFAGDGLFTSETHEPNWKKAHNILMPTFSQRAMK | 116 |
| EJR50635.1             | VCDE-TRFDKSIEG-ALA----  | KVR-AFAGDGLFTSETDEPNWKKAHNILMPTFSQRAMK | 116 |
| EJR64551.1             | VCDE-TRFDKSIDG-ALA----  | KVR-AFAGDGLFTSETDEPNWKKAHNILMPTFSQRAMK | 116 |
| EJR75620.1             | VCDE-TRFDKSIEG-ALA----  | KVR-AFAGDGLFTSETHEPNWKKAHNILMPTFSQRAMK | 116 |
| EJR82049.1             | VCDE-TRFDKSIEG-ALA----  | KVR-AFAGDGLFTSETHEPNWKKAHNILMPTFSQRAMK | 116 |
| EJR83659.1             | VCDE-TRFDKSIEG-ALA----  | KVR-AFAGDGLFTSETHEPNWKKAHNILMPTFSQRAMK | 116 |
| EJR91135.1             | ICDE-SRFDKSIGH--LQ----  | NVR-TFSKDGLFTAQTEEPNWQKAHLLLLPSFSQQAMK | 114 |
| EJR97241.1             | VCDE-TRFDKSIEG-ALA----  | KVR-AFAGDGLFTSETHEPNWKKAHNILMPTFSQRAMK | 116 |
| EJS05852.1             | VCDE-TRFDKSIEG-ALA----  | KVR-AFAGDGLFTSETHEPNWKKAHNILMPTFSQRAMK | 116 |
| EDX58768.1             | VCDE-TRFDKSIEG-ALA----  | KVR-AFAGDGLFTSETQEPNWQKAHNILMPTFSQRAMK | 116 |
| AAU24352.1             | VSEE-SRFDKNMGK-GLL----  | KVR-EFSGDGLFTSWTEEPNWRKAHNILLPSFSQKAMK | 115 |
| ABY44122.1             | VCDE-TRFDKSIEG-ALA----  | KVR-AFAGDGLFTSETHEPNWKKAHNILMPTFSQRAMK | 116 |
| EDW23201.1             | ICDE-SRFDKYIGT-SLN----  | KVR-AFAGDGLFTSWTEEPNWRKAHHILMPAFSQQAMK | 115 |
| ABV62358.1             | VFDE-SRFDKFIGS-SLN----  | KVR-TFSGDGLFTSWTEEPNWRKAHHILMPAFSQQAMK | 115 |
| EIF12263.1             | VCDE-ERFDKSIEG-ALE----  | KVR-AFSGDGLFTSWTHEPNWRKAHNILMPTFSQRAMK | 115 |
| EIF14027.1             | VCDE-KRFDKNLSK-ALL----  | KVR-EFGGDGLFTSWTHEKNWQKAHRILLPSFSQKAMK | 115 |
| EHL75405.1             | VCDE-TRFDKSIEG-ALA----  | KVR-AFAGDGLFTSETHEPNWKKAHNILMPTFSQRAMK | 116 |
| EJD67577.1             | VCDE-ERFDKSIEG-ALE----  | KVR-AFSGDGLFTSWTHEPNWRKAHNILMPTFSQRAMK | 115 |
| EJD68347.1             | VCDE-KRFDKNLSK-ALL----  | KVR-EFGGDGLFTSWTHEKNWQKAHRILLPSFSQKAMK | 115 |
| EFV73436.1             | VSEE-SRFDKNMGK-GLL----  | KVR-EFSGDGLFTSWTEEPNWRKAHNILLPSFSQKAMK | 129 |
| CBY93692.1             | VCDE-TRFDKSIEG-ALA----  | KVR-AFAGDGLFTSETHEPNWKKAHNILMPTFSQRAMK | 116 |
| AFI27355.1             | VCDE-GRFDKSIEG-ALE----  | KVR-AFSGDGLFTSWTHEPNWRKAHNILMPTFSQRAMK | 115 |
| AFI29229.1             | VCDE-SRFDKNL GK-GLL---- | KVR-EFGGDGLFTSWTHEPNWQKAHRILLPSFSQKAMK | 115 |
| EIL85422.1             | VCDE-SRFDKFIGI-SLD----  | KAR-AFAGDGLFTSWTEEPNWRKAHQILMPAFSQQAMK | 115 |
| ADV93500.1             | VCDE-SRFDKNL GK-GLQ---- | KVR-EFGGDGLFTSWTHEPNWQKAHRILLPSFSQKAMK | 115 |
| ADV95715.1             | VCDE-ERFDKSIEG-ALE----  | KVR-AFSGDGLFTSWTHEPNWRKAHNILMPTFSQRAMK | 115 |
| BAI84248.1             | VCDE-ERFDKSIEG-ALE----  | KVR-AFSGDGLFTSWTHEPNWRKAHNILMPTFSQQAMK | 115 |
| EFG90288.1             | VCDE-SRFDKNL GK-GLL---- | KVR-EFGGDGLFTSWTNEPNWQKAHRILLPSFSQKAMK | 115 |
| EFG91781.1             | VCDE-ERFDKSIEG-ALE----  | KVR-AFSGDGLFTSWTHEPNWRKAHNILMPTFSQRAMK | 115 |
| AEP85668.1             | VCDE-ERFDKSIEG-ALE----  | KVR-AFSGDGLFTSWTHEPNWRKAHNILMPTFSQRAMK | 115 |
| AEP87558.1             | VCDE-SRFDKNL GK-GLL---- | KVR-EFGGDGLFTSWTHEPNWQKAHRILLPSFSQKAMK | 115 |
| sp 008336.1 CYPB_BACSU | VCDE-KRFDKNL GK-GLQ---- | KVR-EFGGDGLFTSWTHEPNWQKAHRILLPSFSQKAMK | 115 |
| sp 008394.1 CYPD_BACSU | VCDE-ERFDKSIEG-ALE----  | KVR-AFSGDGLFTSWTHEPNWRKAHNILMPTFSQRAMK | 115 |
| AEP89812.1             | VCDE-ERFDKSIEG-ALE----  | KVR-AFSGDGLFTSWTHEPNWRKAHNILMPTFSQRAMK | 115 |

|            |                        |                                        |     |
|------------|------------------------|----------------------------------------|-----|
| AEP91702.1 | VCDE-SRFDKNLGK-GLQ---- | KVR-EFGGDGLFTSWTHEPNWQKAHRILLPSFSQKAMK | 115 |
| EHA31094.1 | VCDE-SRFDKNLGK-GLQ---- | KVR-EFGGDGLFTSWTHEPNWQKAHRILLPSFSQKAMK | 117 |
| ADH07708.1 | VCDE-TRFDKSIEG-ALA---- | KVR-AFAGDGLFTSETHEPNWKKAHNILMPTFSQRAMK | 116 |
| EEM28177.1 | VCDE-TRFDKSIEG-ALA---- | KVR-AFAGDGLFTSETHEPNWKKAHNILMPTFSQRAMK | 116 |
| AFQ14162.1 | VCDE-TRFDKSIEG-ALA---- | KVR-AFAGDGLFTSETHEPNWKKAHNILMPTFSQRAMK | 116 |
| EEM95517.1 | ICDE-TRFDKSIEG-ALA---- | KVR-AFAGDGLFTSETHEPNWKKAHNILMPTFSQRAMK | 116 |
| EEN02344.1 | VCDE-TRFDKSIEG-ALA---- | KVR-AFAGDGLFTSETHEPNWKKAHNILMPTFSQRAMK | 116 |
| AFU13781.1 | VCDE-TRFDKSIDG-ALA---- | KVR-AFAGDGLFTSETDEPNWKKAHNILMPTFSQRAMK | 124 |
| EEM70897.1 | VCDE-TRFDKSIEG-ALA---- | KVR-AFAGDGLFTSETQEPNWQKAHNILMPTFSQRAMK | 124 |
| ADY22413.1 | VCDE-TRFDKSIEG-ALA---- | KVR-AFAGDGLFTSETHEPNWKKAHNILMPTFSQRAMK | 116 |
| EEM82895.1 | VCDE-TRFDKSIEG-ALA---- | KVR-AFAGDGLFTSETHEPNWKKAHNILMPTFSQRAMK | 116 |
| EEM52818.1 | VCDE-TRFDKSIEG-ALA---- | KVR-AFAGDGLFTSETHEPNWKKAHNILMPTFSQRAMK | 116 |
| EEM59126.1 | VCDE-TRFDKSIEG-ALA---- | KVR-AFAGDGLFTSETQEPNWQKAHNILMPTFSQRAMK | 124 |
| EEM47193.1 | VCDE-TRFDKSIEG-ALA---- | KVR-AFAGDGLFTSETHEPNWKKAHNILMPTFSQRAMK | 57  |
| EEM76899.1 | VCDE-TRFDKSIEG-ALA---- | KVR-AFAGDGLFTSETQEPNWQKAHNILMPTFSQRAMK | 124 |
| EEM88909.1 | VCDE-TRFDKSIEG-ALA---- | KVR-AFAGDGLFTSETDEPNWKKAHNILMPTFSQRAMK | 124 |
| EEM38196.1 | VCDE-TRFDKSIEG-ALA---- | KVR-AFAGDGLFTSETHEPNWKKAHNILMPTFSQRAMK | 116 |
| EEM21858.1 | VCDE-TRFDKSIEG-ALA---- | KVR-AFAGDGLFTSETHEPNWKKAHNILMPTFSQRAMK | 119 |
| ABK86139.1 | VCDE-TRFDKSIEG-ALA---- | KVR-AFAGDGLFTSETQEPNWQKAHNILMPTFSQRAMK | 124 |
| EJQ37805.1 | VCDE-TRFDKSIDG-ALA---- | KVR-AFAGDGLFTSETDEPNWKKAHNILMPTFSQRAMK | 116 |
| CCF04242.1 | VCDE-ERFDKSIEG-ALE---- | KVR-AFAGDGLFTSWTHEPNWRKAHNILMPTFSQRAMK | 115 |
| CCF05972.1 | VCDE-KRFDKNLSK-ALL---- | KVR-EFGGDGLFTSWTHEKNWQKAHRILLPSFSQKAMK | 115 |
| ABS73124.1 | VCDE-ERFDKSIEG-ALE---- | KVR-AFSGDGLFTSWTHEPNWRKAHHILMPTFSQRAMK | 115 |
| ABS74786.1 | VCDE-KRFDKNLSK-ALL---- | KVR-EFGGDGLFTSWTHEKNWQKAHRILLPSFSQKAMK | 115 |
| EKE46398.1 | VCDE-ERFDKSIEG-ALE---- | KVR-AFAGDGLFTSWTHEPNWRKAHNILMPTFSQRAMK | 115 |
| EKE48022.1 | VCDE-KRFDKNLSK-ALL---- | KVR-EFGGDGLFTSWTHEKNWQKAHRILLPSFSQKAMK | 115 |
| CCG48683.1 | VCDE-ERFDKSIEG-ALE---- | KVR-AFSGDGLFTSWTHEPNWRKAHNILMPTFSQRAMK | 115 |
| AFJ60789.1 | VCDE-ERFDKSIEG-ALE---- | KVR-AFSGDGLFTSWTHEPNWRKAHNILMPTFSQRAMK | 122 |
| AFJ62808.1 | VCDE-KRFDKNLSK-ALL---- | KVR-EFGGDGLFTSWTHEKNWQKAHRILLPSFSQKAMK | 115 |
| EEK66903.1 | VCDE-TRFDKSIEG-ALA---- | KVR-AFAGDGLFTSETHEPNWKKAHNILMPTFSQRAMK | 130 |
| EJQ52935.1 | VCDE-TRFDKSIEG-ALA---- | KVR-AFAGDGLFTSETHEPNWKKAHNILMPTFSQRAMK | 116 |
| EJS69574.1 | VCDE-TRFDKSIEG-ALA---- | KVR-AFAGDGLFTSETQEPNWKKAHNILMPTFSQRAMK | 116 |
| EJV63294.1 | VCDE-TRFDKSIEG-ALA---- | KVR-AFAGDGLFTSETQEPNWKKAHNILMPTFSQRAMK | 116 |
| EKF35778.1 | VCDE-SRFDKYIGI-SLD---- | KAR-AFAGDGLFTSWTEEPNWRKAHQILMPAFSQQAMK | 115 |
| EGP08506.1 | LSDE-KRFDKAV-RGALR---- | RVR-AIGGDGLFTADTTEPNWSKAHNILLQPFGRAMQ  | 118 |
| BAL78328.1 | LSDE-KRFDKTV-RGALR---- | RVR-AVGGDGLFTADTREPUNWSKAHNILLQPFGRAMQ | 118 |
| BAC48147.1 | LSDE-KRFDKTV-RGALR---- | RVR-AVGGDGLFTADTREPUNWSKAHNILLQPFGRAMQ | 118 |
| BAL12135.1 | LSDE-KRFDKTV-RGALR---- | RVR-AVGGDGLFTADTREPUNWSKAHNILLQPFGRAMQ | 118 |

|            |                         |                                         |     |
|------------|-------------------------|-----------------------------------------|-----|
| CCE00185.1 | LSDE-KRFDKVV-RGALR----  | RVR-AIGGDGLFTADTREPNWTKAHNILLQPFGNRAMQ  | 118 |
| EIG57609.1 | LSDE-KRFDKTV-RGALR----  | RVR-AVGGDGLFTADTKEPNWSKAHNILLQPFGNRAMQ  | 118 |
| EHR02046.1 | LSDE-KRFDKTV-RGALR----  | RVR-AVGGDGLFTADTREPNWSKAHNILLQPFGNRAMQ  | 118 |
| EJN11211.1 | LSDE-KRFDKTV-RGALR----  | RVR-AVGGDGLFTADTREPNWSKAHNILLQPFGNRAMQ  | 118 |
| CCF15606.1 | ACDE-SRFDKNVWP-PLQ----  | KVR-TFAGDGLFTSSTDEPNWQKAHNILLPSFSQRAMQ  | 57  |
| CCF12687.1 | VCDE-SRFFKNITG-DLE----  | NVR-AFSGDGLFTSRIEEPNWQKAHNILLPSFSQQAMK  | 115 |
| ABB05850.1 | VCDE-TRFQKCV-HQSLL----  | ELR-PAIGDGLFTAFGDEPNWAKAHRVLMQAFGPLSIW  | 115 |
| EHP43606.1 | LSDG-QRFRKIV-GPPLS----  | YLR-DLAGDGLFTAHAAEENWGRAHRILMPAFSQRAMK  | 139 |
| ABF10339.1 | LCDA-TRFRKII-GPPLS----  | YLR-DMAGDGLFTAHSDEPNWGCAHRILMPAFSQRAMK  | 121 |
| CAJ95800.1 | LCDA-AQFRKYI-GPPVS----  | YLR-GMAGDGLFTARSDEANWGKAHRILMPAFSQRAMK  | 141 |
| AEI79937.1 | LCDA-ARFRKYI-GPPLS----  | YLR-GMAGDGLFTARSDEANWGKAHRILMPAFSQRAMK  | 141 |
| AFD27790.1 | LSDQ-ERFDKQV-HDDLE----  | EIR-AFAGDGLFTAETAEPNWRRAHNILMPAFGLAIR   | 117 |
| ABC62112.1 | ICDE-SRFDKTV-RGPLK----  | RLR-LIAGDGLFTGDTDDPNWAKAHHILLPSFSQKAMG  | 118 |
| EAQ27850.1 | VCDE-KRFDKSV-RGPLK----  | RLR-LIGGDGLFTGDTDAPNWSKAHNILLPSFSQKAMG  | 118 |
| EIT84377.1 | VCDE-TRFAKSIEG-ALE----  | KVR-AFAGDGLFTSWGDEPNWQKAHNILMPTFSQRAMK  | 115 |
| CCG43686.1 | ICDE-SRFDKKGVP-ALQ----  | KVR-AFGGDGLFTSETEEINWKKAHNILLPSFSQQAMK  | 115 |
| ABX05160.1 | ISDQ-QRFDKLL-HGPLI----  | QIR-DFAGDGLFTAYTEEANWSKAHRLLLMPAFGPASMR | 118 |
| BAJ96920.1 | ACDE-KRFNKRIV-GGALN---- | EVR-SFTGDGLFTAQNSEKNYKKGHRILASAFSPVAMH  | 113 |
| GAB96874.1 | LCDE-SRFDKRV-HQPLE----  | NIR-AFAGDGLFTVHTPEENWGKAHRILMPAFSPFALK  | 154 |
| EFH80345.1 | LSDE-TRFDKRV-WRPLQ----  | NVR-AFAGDGLFTAYTQEANWHKAHNILLPNFSMRAMQ  | 119 |
| EFH88481.1 | VCND-QFFDKRV-SVNVR----  | NLR-SAIGSGLFSADTSDPNWRKAHTILMPSFSLQAMR  | 111 |
| EAW32450.1 | LCDE-SRFDKVV-SGPLS----  | NIR-DIALDGLFTAKTTEPNWQKAHNILMPAFMSGAMS  | 113 |
| EIZ82104.1 | LCDE-GRFEKKL-HRPLE----  | MLR-DLGGDGLFTARNDEPNWGKAHRLLLMPAFGPLGIR | 115 |
| AEV70722.1 | LCDE-SRFAKNL-TPTLA----  | RVR-PLAGDGLFTAYYGEPNWQKAHDVLLPGFSYAGLR  | 121 |
| EFC41452.1 | LCDE-SRFEKAL-PPGLK----  | HVK-EFGGDGLFTAENNEPNWAIHRIILMPAFGPKSIQ  | 144 |
| ACV78954.1 | ACDD-SRFDKS-----PAQ---- | RLR-AVLGDGLFTAFTDSRAWQRGHRIIAPAFTGAAIS  | 113 |
| ACV78964.1 | MCDD-QKFDKKI-GAGLK----  | ALQKSVAGSGLFTSDTADPMWHRAHNILMAPFSQQAMR  | 119 |
| ACV81379.1 | ICDD-ERFDKQL-GPGLV----  | AAR-GTGTPLFLSETSDPLWRRAHNILMAPFSQSSMR   | 118 |
| EIZ78677.1 | ACDE-ARFSKKV-HRPLE----  | MLR-DLGGDGLFTAYGDEPNWAKAHRLLMPAFGPIGVR  | 113 |
| EJW15291.1 | FSDT-ARFGKIVDKTILN----  | NVR-AYAGDGLFTSETNDPNWKKAHNILLPSFSRTAMR  | 114 |
| EJW16173.1 | ACDE-SRFDKNVWA-PLR----  | SVR-AFTGDGLFTSETAEPNWQKAHHILLPSFSQSAMR  | 117 |
| EHQ58913.1 | LTDP-SRFDKIVDKTVLE----  | KVR-AILGDGLFTSETTEPNWRKAHNILLPSFSRTAMR  | 114 |
| EHQ59900.1 | ACDE-SRFDKNLWA-PLQ----  | KVR-AFAGDGLFTSATEEPNWSKAHNILLPSFSQRAMQ  | 115 |
| EHB66924.1 | ACDE-KRFDKRIWA-PLQ----  | NVR-AFAGDGLFTSATHEPNWKKAHNILLSSFSQRAMQ  | 115 |
| AFH60445.1 | ACDE-SRFDKYVWA-PLQ----  | KVR-AFAGDGLFTAETDEPNWQKAHAILLPSFSQRAMQ  | 115 |
| AEI42011.1 | ACDE-SRFDKYVWA-PLQ----  | KVR-AFAGDGLFTAETDEPNWQKAHAILLPSFSQRAMQ  | 115 |
| ADO57681.1 | ACDE-SRFDKQVWA-PLQ----  | KVR-AFAGDGLFTSWTEEPNWRKAHQILLPSFSQRAMK  | 115 |
| EGG32133.1 | ACDE-KRFDKRIWA-PLQ----  | NVR-PFAGDGLFTSATQEPNWKKAHNILLSSFSQRAMQ  | 116 |

|            |                                                                 |     |
|------------|-----------------------------------------------------------------|-----|
| EGL17662.1 | ACDE-SRFDKKIGA-ALS-----NVR-AFGGDGLFTAHTDEPNWQKAHHILLPTFSQRAMK   | 116 |
| ACX65034.1 | ACDE-KRFDKRIWA-PLQ-----NVR-PFAGDGLFTSATQEPNWKKAHNILLSSFSQRAMQ   | 116 |
| ACT11327.1 | LSDE-SFFEKKL-SAELL-----ELR-YLGGDGLFTAHTHEPNWGKAHRILMPALGPLGVR   | 115 |
| AEA28016.1 | LCDD-SRFDKLV-GTAQK-----ELRKTRPSDGLFTAHTDDPMWSRAHNILLPNFSMQAMQ   | 121 |
| EFP68091.1 | LCDE-TRFRKLI-GPPLS-----FLR-AGAGDGLFTAHQDEPNWGKAHRILLPAFSQRAMK   | 128 |
| EGY61507.1 | LCDE-TRFRKLI-GPPLS-----FLR-AGAGDGLFTAHQDEPNWGKAHRILLPAFSQRAMK   | 128 |
| EIE85788.1 | FARESEYFTKKITKSGLG-----EVK-EFAGQGLFTTDTDEMDWQLAHKLLMPAFSPRAIK   | 197 |
| EIE92534.1 | FAKESEYFTKKITKSGLG-----EVK-EFAGQGLFTTDTDEMDWQLAHKLLMPAFSPRAIK   | 197 |
| BAE46296.1 | VNNE-ALWAKSV-GLPIL-----KLR-KVAEDGLFTA FNSEP NWRKAHNILSEGFSRSALR | 169 |
| BAH31604.1 | LSDE-SRFAKHL-APGVK-----ALR-GIGGDGLFTA YNHEPNWGKAHNLLAPAFSQTAMR  | 124 |
| EEN84644.1 | LSDE-SRFAKHL-APGVK-----ALR-GIGGDGLFTA YNHEPNWGKAHNLLAPAFSQTAMR  | 124 |
| EEN88978.1 | VNNE-ALWAKSV-GLPIR-----KLR-AVAEDGLFTA FNSEP NWRKAHNILNAGFSQAALR | 209 |
| ABG96413.1 | LSDE-SRFAKHL-APGVA-----SLR-EVGGDGLFTA YNHEPNWSKAHNLLAPAFTKSAMR  | 156 |
| BAH52971.1 | LSDE-TRFAKHL-APGVA-----SLR-EVGGDGLFTA YNHEPNWSKAHNLLAPAFTKSAMR  | 123 |
| EHI44575.1 | LSDE-SRFAKHL-APGVA-----SLR-EVGGDGLFTA YNHEPNWSKAHNLLAPAFTKSAMR  | 158 |
| EID73168.1 | LSDE-SRFAKHL-APGVA-----SLR-EVGGDGLFTA YNHEPNWSKAHNLLAPAFTKSAMR  | 123 |
| EHK83749.1 | VNDE-EKWAKFL-GKPLR-----KLR-VIAGDGLFTA FNSEP NWSKAHNILGPGFSQAAMR | 100 |
| EJI96173.1 | LSDE-SRFAKHL-APGVA-----SLR-EVGGDGLFTA YNHEPNWSKAHNLLAPAFTKSAMR  | 123 |
| ABI79384.1 | VFDE-TRFAKAV-VPPVS-----TLR-ELAGDGLFTA FNSEP AWAQAHNVLMPAFSQASMR | 152 |
| CAR47816.1 | VFDE-TRFAKAV-VPPVS-----NLR-ELAGDGLFTA FNSEP AWAQAHNVLMPAFSQASMR | 154 |
| AEK26937.1 | VNDE-EKWAKFL-GKPLR-----KLR-VIAGDGLFTA FNSEP NWSKAHNILGPGFSQAAMR | 132 |
| ABE39056.1 | ISDE-KRFDKAV-RGALR-----RAR-AVGGDGLFTA DTKEPNWSKAHNILLTPFGGRAMQ  | 118 |
| ABD08340.1 | ISDE-KRFDKAV-RGALR-----RVR-TVGGDGLFTA DTSEPNWSKAHNILLTPFGGRAMQ  | 118 |
| CAM03474.1 | LSDE-QRFAKAV-GPALE-----NVR-EFAADGLFTA YNDEFNWAKAHDILMPAFALGSMR  | 113 |
| EJF54063.1 | FCNE-DRFDKKV-FSALE-----KVR-DLTGDGLFTA HTTEPNWGKAHRILTPAFGPHAMR  | 129 |
| AFC23737.1 | FCDE-DRFDKKV-FSALE-----KVR-DLTGDGLFTA HTTEPNWGKAHRILTPAFGPHAMQ  | 117 |
| ADG98903.1 | VNNE-EAWEKHV-GPALH-----KLR-PMAGDGLFTA YNREP NWRKAHNVLMPAFSRSAMV | 124 |
| EGI54680.1 | LCDE-ARFKKAL-HRPLQ-----EAR-YVGGDGLFTA HDEPNWGKAHRLLMPAFGPLGLR   | 112 |
| AEW97204.1 | LCDD-ERFVKAV-GPVL T-----NVR-QIAGDGLFTA YNDEPNWAKAHDILLPAFALSSMH | 130 |
| CAJ88567.1 | LADE-ERFAKHV-GLGVA-----NLR-PVAGDGLFTA YNHEPNWQLAHDV LAPGFSREAMA | 139 |
| BAC68285.1 | VCDE-TRFFKQIDKTPLA-----HVR-DYAGAGLFTA HQHEE EWMAHRVLLPVFSQRAMK  | 122 |
| BAC75137.1 | LADE-SRFAKHV-GLGVA-----NLR-PVAGDGLFTA YNHEPNWQLGHDV LAPGFSREAMA | 135 |
| EDY51256.1 | LCDE-TRFRKSV-QP-IA-----AVR-EFAGDGLFTA FGD EPNWRKAHNILMPAFSYNALR | 102 |
| EFG07822.1 | LCDE-TRFRKSV-QP-IA-----AVR-EFAGDGLFTA FGD EPNWRKAHNILMPAFSYNALR | 134 |
| EHN78335.1 | LADE-TRFAKHV-GLGVA-----NLR-PVAGDGLFTA YNHEPNWQLAHDV LAPGFSREAMA | 139 |
| CAB66201.1 | LADE-ARFAKHV-GLGVA-----NLR-PVAGDGLFTA YNHEPNWQLAHDV LAPGFSREAMA | 139 |
| EGG48117.1 | LADE-SRFAKHV-GLGVA-----NLR-PVAGDGLFTA YNHEPNWQLAHDV LAPGFSREAMS | 146 |
| EFL20831.1 | LADE-TRFRKNV-HPDLV-----VLR-AIGGDGLFTA FNDEPNWRKAHDILMPAFSLGAMR  | 126 |

|            |                         |                                        |     |
|------------|-------------------------|----------------------------------------|-----|
| EFL28515.1 | LCDD-QRFAKYV-NQSLE----  | NVR-EFTHDGLFTAYNDEPNWAKAHDILMPAFALGSMR | 121 |
| AEY93311.1 | LADE-SRFAKHV-GLGVA----  | NLR-PVAGDGLFTAYNHEPNWQLAHDVLPAGFSREAME | 138 |
| AEY93321.1 | LADE-ERFAKHV-GPALR----  | NVR-EFAADGLFTAYNDEPNWAKAHDILMPAFALGSMR | 119 |
| EFD71156.1 | LADE-ARFAKHV-GLGVA----  | NLR-PVAGDGLFTAYNHEPNWQLAHDVLPAGFSREAMA | 139 |
| CBG67789.1 | LSDE-SRFRKNV-HADLV----  | LVR-EITGDGLFTAFNDEPNWRKAHDVLMPAFSLGAMR | 121 |
| CBG68112.1 | MADE-ARFAKHV-GVGVA----  | NLR-PVAGDGLFTAYNHEPNWQLAHDVLPAGFGREAMA | 135 |
| EFL10082.1 | LNDE-TKFGKHV-GLGVE----  | RLR-AVAGDGLFTAHTREPWNRLAHDILQPAFSAESMR | 155 |
| EFF88741.1 | LSDE-TRFRKAI-GKDLS----  | AVR-PIGGDGLFTAYGDEPNWRKAHDVLMPSFSLGAMR | 121 |
| EDY58112.1 | LADE-SRFAKHV-GLGVA----  | NLR-PVAGDGLFTAYNHEPNWQLAHDVLPAGFSREAMA | 135 |
| EFL36674.1 | LADE-SRFAKHV-GLGIA----  | NLR-PVAGDGLFTAYNHEPNWQLAHDVLPAGFSREAMA | 148 |
| EFL36680.1 | LADE-QRFAKHI-GPGLE----  | NVR-EFAADGLFTAYNDEPNWAKAHDILMPAFALGSMR | 169 |
| EFE65335.1 | LADE-TRFAKHV-GLGVA----  | NLR-PLAGDGLFTAYNHEPNWQLAHDVLPAGFRREAMA | 136 |
| EGX54696.1 | IADDE-SRFAKHV-GLGVA---- | NLR-PVAGDGLFTAYNHEPNWQLAHDVLPAGFSREAMA | 136 |
| ACZ89135.1 | ACDE-SRFEKHV-HGPLE----  | HIR-DFAGDGLFTAYGDEPNWARAHRILMPAFGPAAMR | 118 |
| ABD83817.1 | LSVE-TRLDKVV-RGALR----  | RVR-AIGGDGLFTADTAEPNWSKARNILLQPFGNRAMQ | 118 |
| ADU39615.1 | LCEE-ARFDKST-RGALR----  | RLR-AA-SHGLFTSDTHEETWSKPHNILLANFSQRAMQ | 117 |
| EJL72014.1 | LCEE-ARFDKST-RGALR----  | RLR-AA-SHGLFTSDTHEETWSKPHNILLANFSQRAMQ | 117 |

|                        |                                                              |     |
|------------------------|--------------------------------------------------------------|-----|
| sp P14779.2 CPXB_PRIM2 | GYHAMMVDIAVQLVQKWERLN-ADEHIEVPEDMTRLTLDITGLCGFNRYRNSFYR--DQP | 171 |
| ADF40088.1             | GYHAMMVDIAVQLVQKWERLN-ADEHIEVPEDMTRLTLDITGLCGFNRYRNSFYR--DQP | 171 |
| ADE70259.1             | GYHAMMVDIAVQLIQKWERLN-TDEHIEVPEDMTRLTLDITGLCGFNRYRNSFYR--DQP | 171 |
| AEN88827.1             | GYHAMMVDIAVQLIQKWERLN-ADEHIEVPEDMTRLTLDITGLCGFNRYRNSFYR--DQP | 171 |
| KFN05180.1             | GYHAMMVDIAVQLVQKWERLN-ADEHIEVPEDMTRLTLDITGLCGFNRYRNSFYR--DQP | 171 |
| ACZ37122.1             | GYHAMMVDIAVQLIQKWERLN-TDEHIEVPEDMTRLTLDITGLCGFNRYRNSFYR--DQP | 171 |
| ADA57055.1             | GYHAMMVDIAVQLIQKWERLN-TDEHIEVPEDMTRLTLDITGLCGFNRYRNSFYR--DQP | 171 |
| ADA57058.1             | GYHAMMVDIAVQLIQKWERLN-TDEHIEVPEDMTRLTLDITGLCGFNRYRNSFYR--DQP | 171 |
| ADA57059.1             | GYHAMMVDIAVQLVQKWERLN-ADEHIEVPEDMTRLTLDITGLCGFNRYRNSFYR--DQP | 171 |
| ADA57061.1             | GYHAMMVDIAVQLIQKWERLN-TDEHIEVPEDMTRLTLDITGLCGFNRYRNSFYR--DQP | 171 |
| ADA57062.1             | GYHAMMVDIAVQLIQKWERLN-TDEHIEVPEDMTRLTLDITGLCGFNRYRNSFYR--DQP | 171 |
| ADA57068.1             | GYHAMMVDIAVQLIQKWERLN-TDEHIEVPEDMTRLTLDITGLCGFNRYRNSFYR--DQP | 171 |
| AAT62301.1             | DYHAMMVDIAVQLVQKWARLN-PNENVDPEDMTRLTLDITGLCGFNRYRNSFYR--ETP  | 173 |
| AAM54108.1             | DHFPAMLDIAEQMLVRRRFG-PDHRIDVADDMTRLTLDITGLCAFGARFNSFYR--DRA  | 176 |
| EFQ83738.1             | SYHPIMVETLDELFAWDHQ---EGPVDVSRDMTKLTMETLSRAAFSKDFGSFTS--TEV  | 174 |
| EFL88452.1             | GYMPMQDVATQLCTKWERMN-ADEEIDVVDHMTAVALDITGICGFDYRNSFYR--RDY   | 173 |
| BAF89518.1             | NYGRIVEVADDLLDHLDRLA-PGESFLATDLMTRMTFEAISYAANRRYGAIDS--PAL   | 263 |
| CBI43648.1             | GYHSMMLDIAMQLVQKWSRLN-PNEEIDVAEDMTRLTLDITGLCGFHRYRNSFYR--DTQ | 172 |
| AEB22839.1             | DYHSMMTDIAVQLIQKWARLN-PDEAVDVPADMTRLTLDITGLCGFNRYRNSFYR--ETP | 172 |
| EDT22025.1             | DYHAMMVDIAVQLVQKWARLN-PNENVDPEDMTRLTLDITGLCGFNRYRNSFYR--ETP  | 173 |
| AFH84458.1             | DYHAMMVDIAVQLVQKWARLN-PNENVDPEDMTRLTLDITGLCGFNRYRNSFYR--ETP  | 181 |
| ADP31197.1             | EYHSMMVDIAVQLIQKWARLN-PNEAVDVPDGMTRLTLDITGLCGFNRYRNSFYR--ETP | 172 |
| ACP19384.1             | DYHAMMVDIAVQLVQKWARLN-PNENVDPEDMTRLTLDITGLCGFNRYRNSFYR--ETP  | 173 |
| ADL27534.1             | DYHAMMVDIAVQLVQKWARLN-PNENVDPEDMTRLTLDITGLCGFNRYRNSFYR--ETP  | 173 |
| ACO29732.1             | DYHAMMVDIAVQLVQKWARLN-PNENVDPEDMTRLTLDITGLCGFNRYRNSFYR--ETP  | 173 |
| EDX65100.1             | DYHAMMVDIAVQLVQKWARLN-PNENVDPEDMTRLTLDITGLCGFNRYRNSFYR--ETP  | 173 |
| EEK61456.1             | DYHAMMVDIAVQLVQKWARLN-PNENVDPEDMTRLTLDITGLCGFNRYRNSFYR--ETP  | 173 |
| EEL16232.1             | DYHAMMVDIAVQLVQKWARLN-PNENVDPEDMTRLTLDITGLCGFNRYRNSFYR--ETP  | 181 |
| EDZ53094.1             | DYHAMMVDLAVQLVQKWARLN-PNENVDPEDMTRLTLDITGLCGFNRYRNSFYR--ETP  | 173 |
| EEL81346.1             | DYHAMMVDLAVQLVQKWARLN-PNESVDVPEDMTRLTLDITGLCGFNRYRNSFYR--ETP | 187 |
| EEL87105.1             | DYHGMVVDIAVQLVQKWARLN-PNENVDPEDMTRLTLDITGLCGFNRYRNSFYR--ETS  | 187 |
| EEL75761.1             | DYHAMMVDIAVQLVQKWARLN-PNENVDPEDMTRLTLDITGLCGFNRYRNSFYR--ETP  | 114 |
| ACK88541.1             | DYHAMMVDIAVQLVQKWARLN-PNENVDPEDMTRLTLDITGLCGFNRYRNSFYR--ETP  | 173 |
| EJQ05303.1             | DYHAMMVDIAVQLVQKWARLN-PNENVDPDGMTRLTLDITGLCGFNRYRNSFYR--ETS  | 173 |
| EEK50040.1             | DYHAMMVDIAVQLVQKWARLN-PNENVDPEDMTRLTLDITGLCGFNRYRNSFYR--ETP  | 173 |
| AAS42149.1             | DYHAMMVDIAVQLVQKWARLN-PNENVDPEDMTRLTLDITGLCGFNRYRNSFYR--ETP  | 173 |
| AAP10153.1             | DYHAMMVDIAVQLVQKWARLN-PNENVDPEDMTRLTLDITGLCGFNRYRNSFYR--ETP  | 173 |
| EEK83466.1             | DYHAMMVDIAVQLVQKWARLN-PNENVDPDGMTRLTLDITGLCGFNRYRNSFYR--ETS  | 181 |

|            |                                                             |     |
|------------|-------------------------------------------------------------|-----|
| ACK63698.1 | DYHAMMVDIQVQLVQKWARLN-PNENVDPEDMTRLTLDITGLCGFNFRNSFYR--ETP  | 114 |
| EJS57156.1 | DYHAMMVDLAVQLVQKWARLN-PNENVDPEDMTRLTLDITGLCGFNFRNSFYR--ETP  | 173 |
| EJS56605.1 | DYHGMVVDIAVQLVQKWARLN-PNENVDPEDMTRLTLDITGLCGFNFRNSFYR--ETS  | 173 |
| EJS68951.1 | DYHAMMVDIQVQLVQKWARLN-PNEEVDVPEDMTRLTLDITGLCGFNFRNSFYR--ETP | 172 |
| EJQ10567.1 | DYHAMMVDIQVQLVQKWARLN-PNENVDPEDMTRLTLDITGLCGFNFRNSFYR--ETP  | 173 |
| EJQ13433.1 | DYHAMMVDIQVQLVQKWARLN-PNENVDPEDMTRLTLDITGLCGFNFRNSFYR--ETP  | 173 |
| EJQ20399.1 | DYHAMMVDIQVQLVQKWARLN-PNENVDPEDMTRLTLDITGLCGFNFRNSFYR--ETP  | 173 |
| EJQ30236.1 | DYHAMMVDIQVQLVQKWARLN-PNENVDPEDMTRLTLDITGLCGFNFRNSFYR--ETP  | 173 |
| EJQ51278.1 | DYHAMMVDIQVQLVQKWARLN-PNEEVDVPEDMTRLTLDITGLCGFNFRNSFYR--ETP | 172 |
| EEL10858.1 | DYHAMMVDIQVQLVQKWARLN-PNENVDPEDMTRLTLDITGLCGFNFRNSFYR--ETP  | 173 |
| EEL05393.1 | DYHAMMVDIQVQLVQKWARLN-PNENVDPEDMTRLTLDITGLCGFNFRNSFYR--ETP  | 187 |
| EEK94080.1 | DYHAMMVDIQVQLVQKWARLN-PNENVDPEDMTRLTLDITGLCGFNFRNSFYR--ETP  | 176 |
| EEK99882.1 | DYHAMMVDIQVQLVQKWARLN-PNENVDPEDMTRLTLDITGLCGFNFRNSFYR--ETS  | 176 |
| EEK55784.1 | DYHAMMVDIQVQLVQKWARLN-PNENVDPEDMTRLTLDITGLCGFNFRNSFYR--ETP  | 181 |
| ADK05784.1 | DYHAMMVDIQVQLVQKWARLN-PKENVDPEDMTRLTLDITGLCGFNFRNSFYR--ETS  | 173 |
| AAU17340.1 | DYHAMMVDIQVQLVQKWARLN-PNENVDPEDMTRLTLDITGLCGFNFRNSFYR--ETP  | 173 |
| EEL64394.1 | DYHAMMVDIQVQLVQKWARLN-PNENVDPEDMTRLTLDITGLCGFNFRNSFYR--ETP  | 173 |
| AEW56259.1 | DYHAMMVDIQVQLVQKWARLN-PNENVDPEDMTRLTLDITGLCGFNFRNSFYR--ETP  | 173 |
| AFQ11690.1 | DYHAMMVDIQVQLVQKWARLN-PNENVDPEDMTRLTLDITGLCGFNFRNSFYR--ETP  | 173 |
| EAL16831.1 | DYHAMMVDIQVQLVQKWARLN-PNENVDPEDMTRLTLDITGLCGFNFRNSFYR--ETS  | 173 |
| ACK94296.1 | DYHAMMVDLAVQLVQKWARLN-PNEDVDVPEDMTRLTLDITGLCGFNFRNSFYR--ETP | 173 |
| EDZ58760.1 | DYHAMMVDIQVQLVQKWARLN-PNENVDPEDMTRLTLDITGLCGFNFRNSFYR--ETS  | 173 |
| EJV84218.1 | DYHAMMVDIQVQLVQKWARLN-PNENVDPEDMTRLTLDITGLCGFNFRNSFYR--ETP  | 173 |
| EJQ69212.1 | DYHAMMVDIQVQLVQKWARLN-PNENVDPEDMTRLTLDITGLCGFNFRNSFYR--ETP  | 173 |
| EJQ80339.1 | DYHAMMVDIQVQLVQKWARLN-PNENVDPEDMTRLTLDITGLCGFNFRNSFYR--ETP  | 173 |
| EJV81602.1 | DYHAMMVDLAVQLVQKWARLN-PNENVDPEDMTRLTLDITGLCGFNFRNSFYR--ETP  | 173 |
| EJQ95474.1 | DYHAMMVDIQVQLVQKWARLN-PNENVDPEDMTRLTLDITGLCGFNFRNSFYR--ETS  | 173 |
| EEK44229.1 | DYHAMMVDIQVQLVQKWARLN-PNENVDPEDMTRLTLDITGLCGFNFRNSFYR--ETS  | 181 |
| EEK88560.1 | DYHAMMVDIQVQLVQKWARLN-PNENVDPEDMTRLTLDITGLCGFNFRNSFYR--ETP  | 173 |
| EJR07451.1 | DYHAMMVDLAVQLVQKWARLN-PNEDVDVPEDMTRLTLDITGLCGFNFRNSFYR--ETP | 173 |
| EJR16542.1 | DYHAMMVDIQVQLVQKWARLN-PNENVDPEDMTRLTLDITGLCGFNFRNSFYR--ETS  | 173 |
| BAL18840.1 | DYHAMMVDIQVQLVQKWARLN-PNENVDPEDMTRLTLDITGLCGFNFRNSFYR--ETS  | 173 |
| EDX69960.1 | DYHAMMVDIQVQLVQKWARLN-PNENVDPEDMTRLTLDITGLCGFNFRNSFYR--ETP  | 173 |
| ACM13462.1 | DYHAMMVDIQVQLVQKWARLN-PNENVDPEDMTRLTLDITGLCGFNFRNSFYR--ETS  | 173 |
| EEK75631.1 | DYHAMMVDVAVQLVQKWARLN-PNENVDPEDMTRLTLDITGLCGFNFRNSFYR--ETP  | 173 |
| EEL25491.1 | DYHAMMVDIQVQLVQKWARLN-PNENVDPEDMTRLTLDITGLCGFNFRNSFYR--ETP  | 114 |
| EEL21990.1 | DYHGMVVDIAVQLVQKWARLN-PNENVDPEDMTRLTLDITGLCGFNFRNSFYR--ETS  | 181 |
| EEL33825.1 | DYHGMVVDIAVQLVQKWARLN-PNENVDPEDMTRLTLDITGLCGFNFRNSFYR--ETS  | 181 |

|                        |                                                              |     |
|------------------------|--------------------------------------------------------------|-----|
| EEL44933.1             | DYHAMMVDIQVQLVQKWARLN-PNENVDPEDMTRLTLDITGLCGFNFRNSFYR--ETP   | 181 |
| EEL50167.1             | DYHTMMVDIAVQLVQKWARLN-PNEVDVDPEDMTRLTLDITGLCGFNFRNSFYR--ETP  | 251 |
| EJR22930.1             | DYHAMMVDLAVQLVQKWARLN-PNENVDPEDMTRLTLDITGLCGFNFRNSFYR--ETP   | 173 |
| EJP91231.1             | DYHAMMVDLAVQLVQKWARLN-PNEDVDVDPEDMTRLTLDITGLCGFNFRNSFYR--ETP | 173 |
| EJR37623.1             | DYHAMMVDIQVQLVQKWARLN-PNENVDPEDMTRLTLDITGLCGFNFRNSFYR--ETP   | 173 |
| EJR50635.1             | DYHAMMVDIQVQLVQKWARLN-PNENVDPEDMTRLTLDITGLCGFNFRNSFYR--ETS   | 173 |
| EJR64551.1             | DYHAMMVDIQVQLVQKWARLN-PNENVDPEDMTRLTLDITGLCGFNFRNSFYR--ETS   | 173 |
| EJR75620.1             | DYHAMMVDIQVQLVQKWARLN-PNENVDPEDMTRLTLDITGLCGFNFRNSFYR--ETP   | 173 |
| EJR82049.1             | DYHAMMVDIQVQLVQKWARLN-PNENVDPEDMTRLTLDITGLCGFNFRNSFYR--ETP   | 173 |
| EJR83659.1             | DYHAMMVDIQVQLVQKWARLN-PNENVDPEDMTRLTLDITGLCGFNFRNSFYR--ETP   | 173 |
| EJR91135.1             | GYHSMVVDIAMQLVQKWARLN-PDENIDVCDMTRLTLDITGLCGFNFRNSFYR--ETP   | 171 |
| EJR97241.1             | DYHAMMVDIQVQLVQKWARLN-PNENVDPEDMTRLTLDITGLCGFNFRNSFYR--ETP   | 173 |
| EJS05852.1             | DYHAMMVDIQVQLVQKWARLN-PNENVDPEDMTRLTLDITGLCGFNFRNSFYR--ETP   | 173 |
| EDX58768.1             | DYHAMMVDIQVQLVQKWARLN-PNENVDPEDMTRLTLDITGLCGFNFRNSFYR--ETP   | 173 |
| AAU24352.1             | GYHPMMQDIQVQLVQKWARLN-QDESIDVPDDMTRLTLDITGLCGFNFRNSFYR--EGQ  | 172 |
| ABY44122.1             | DYHAMMVDIQVQLVQKWARLN-PNENVDPEDMTRLTLDITGLCGFNFRNSFYR--ETP   | 173 |
| EDW23201.1             | GYHEMMLDIATQLVQKQRTG-RDEEIEVAEDMTKLTLDITGLCGFDFRNSFYK--ENQ   | 172 |
| ABV62358.1             | GYHEMMLDIATQLVQKQRTG-RDEEIEVAEDMTKLTLDITGLCGFDFRNSFYK--ENQ   | 172 |
| EIF12263.1             | DYHSMMTDIAVQLIQKWARLN-PDEAVDVPADMTRLTLDITGLCGFNFRNSFYR--ETP  | 172 |
| EIF14027.1             | GYHSMMLDIAMQLVQKWSRLN-PNEEIDVAEDMTRLTLDITGLCGFHFRNSFYR--DTQ  | 172 |
| EHL75405.1             | DYHAMMVDIQVQLVQKWARLN-PNENVDPEDMTRLTLDITGLCGFNFRNSFYR--ETP   | 173 |
| EJD67577.1             | DYHSMMTDIAVQLIQKWARLN-PDEAVDVPADMTRLTLDITGLCGFNFRNSFYR--ETP  | 172 |
| EJD68347.1             | GYHSMMLDIAMQLVQKWSRLN-PNEEIDVAEDMTRLTLDITGLCGFHFRNSFYR--DTQ  | 172 |
| EFV73436.1             | GYHPMMQDIQVQLVQKWSRLN-QDESIDVPDDMTRLTLDITGLCGFNFRNSFYR--EGQ  | 186 |
| CBY93692.1             | DYHAMMVDIQVQLVQKWARLN-PNENVDPEDMTRLTLDITGLCGFNFRNSFYR--ETS   | 173 |
| AFI27355.1             | DYHEKMVDIAVQLIQKWARLN-PNEAVDVPEDMTRLTLDITGLCGFNFRNSFYR--ETP  | 172 |
| AFI29229.1             | GYHSMMLDIATQLIQKWSRLN-PNEEIDVADDMTRLTLDITGLCGFNFRNSFYR--DSQ  | 172 |
| EIL85422.1             | GYHEMMLDIATQLVQKQRTG-RDEEIEVAEDMTKLTLDITGLCGFDFRNSFYK--ENQ   | 172 |
| ADV93500.1             | GYHSMMLDIATQLIQKWSRLN-PNEEIDVADDMTRLTLDITGLCGFNFRNSFYR--DSQ  | 172 |
| ADV95715.1             | DYHEKMVDIAVQLIQKWARLN-PNEAVDVPEDMTRLTLDITGLCGFNFRNSFYR--ETP  | 172 |
| BAI84248.1             | DYHEKMVDIAVQLIQKWARLN-PNEVDVDPEDMTRLTLDITGLCGFNFRNSFYR--ETP  | 172 |
| EFG90288.1             | GYHSMMLDIATQLIQKWSRLN-PNEEIDVADDMTRLTLDITGLCGFNFRNSFYR--DSQ  | 172 |
| EFG91781.1             | DYHEKMVDIAVQLIQKWARLN-PNEAVDVPEDMTRLTLDITGLCGFNFRNSFYR--ETP  | 172 |
| AEP85668.1             | DYHEKMVDIAVQLIQKWARLN-PNEAVDVPEDMTRLTLDITGLCGFDYFRNSFYR--ETP | 172 |
| AEP87558.1             | GYHSMMLDIATQLIQKWSRLN-PNEEIDVADDMTRLTLDITGLCGFNFRNSFYR--DSQ  | 172 |
| sp 008336.1 CYPB_BACSU | GYHSMMLDIATQLIQKWSRLN-PNEEIDVADDMTRLTLDITGLCGFNFRNSFYR--DSQ  | 172 |
| sp 008394.1 CYPD_BACSU | DYHEKMVDIAVQLIQKWARLN-PNEAVDVPEDMTRLTLDITGLCGFNFRNSFYR--ETP  | 172 |
| AEP89812.1             | DYHEKMVDIAVQLIQKWARLN-PNEAVDVPEDMTRLTLDITGLCGFNFRNSFYR--ETP  | 172 |

|            |                                                              |     |
|------------|--------------------------------------------------------------|-----|
| AEP91702.1 | GYHSMMLDIATQLIQKWSRLN-PNEEIDVADDMTRLTLDITGLCGFNRYRNSFYR--DSQ | 172 |
| EHA31094.1 | GYHSMMLDIATQLIQKWSRLN-PNEEIDVADDMTRLTLDITGLCGFNRYRNSFYR--DSQ | 174 |
| ADH07708.1 | DYHAMMVDIQVQLVQKWARLN-PNENVDPEDMTRLTLDITGLCGFNRYRNSFYR--ETP  | 173 |
| EEM28177.1 | DYHAMMVDIQVQLVQKWARLN-PNENVDPEDMTRLTLDITGLCGFNRYRNSFYR--ETP  | 173 |
| AFQ14162.1 | DYHAMMVDLAVQLVQKWARLN-PNEDVDVPEDMTRLTLDITGLCGFNRYRNSFYR--ETP | 173 |
| EEM95517.1 | DYHAMMVDIQVQLVQKWARLN-PNENVDVTDGMTRLTLDITGLCGFNRYRNSFYR--ETP | 173 |
| EEN02344.1 | DYHAMMVDLAVQLVQKWARLN-PNEDVDVPEDMTRLTLDITGLCGFNRYRNSFYR--ETP | 173 |
| AFU13781.1 | DYHGMVVDIAVQLVQKWARLN-PNENVDPEDMTRLTLDITGLCGFNRYRNSFYR--ETS  | 181 |
| EEM70897.1 | DYHAMMVDIQVQLVQKWARLN-PNENVDPEDMTRLTLDITGLCGFNRYRNSFYR--ETP  | 181 |
| ADY22413.1 | DYHAMMVDIQVQLVQKWARLN-PNENVDPEDMTRLTLDITGLCGFNRYRNSFYR--ETS  | 173 |
| EEM82895.1 | DYHAMMVDIQVQLVQKWARLN-PNENVDPEDMTRLTLDITGLCGFNRYRNSFYR--ETP  | 173 |
| EEM52818.1 | DYHAMMVDIQVQLVQKWARLN-PNENVDPEDMTRLTLDITGLCGFNRYRNSFYR--ETP  | 173 |
| EEM59126.1 | DYHAMMVDIQVQLVQKWARLN-PNENVDPEDMTRLTLDITGLCGFNRYRNSFYR--ETP  | 181 |
| EEM47193.1 | DYHAMMVDIQVQLVQKWARLN-PNENVDPEDMTRLTLDITGLCGFNRYRNSFYR--ETP  | 114 |
| EEM76899.1 | DYHAMMVDIQVQLVQKWARLN-PNENVDPEDMTRLTLDITGLCGFNRYRNSFYR--ETP  | 181 |
| EEM88909.1 | DYHAMMVDIQVQLVQKWARLN-PNENVDPEDMTRLTLDITGLCGFNRYRNSFYR--ETS  | 181 |
| EEM38196.1 | DYHAMMVELAVQLVQKWARLN-PNEDVDVPEDMTRLTLDITGLCGFNRYRNSFYR--ETP | 173 |
| EEM21858.1 | DYHAMMVDIQVQLVQKWARLN-PNENVDPEDMTRLTLDITGLCGFNRYRNSFYR--ETS  | 176 |
| ABK86139.1 | DYHAMMVDIQVQLVQKWARLN-PNENVDPEDMTRLTLDITGLCGFNRYRNSFYR--ETP  | 181 |
| EJQ37805.1 | DYHGMVVDIAVQLVQKWARLN-PNENVDPEDMTRLTLDITGLCGFNRYRNSFYR--ETS  | 173 |
| CCF04242.1 | DYHSMMTDIAVQLIQKWARLN-PDEAVDVPADMTRLTLDITGLCGFNRYRNSFYR--ETP | 172 |
| CCF05972.1 | GYHSMMLDIAMQLVQKWSRLN-PNEEIDVAEDMTRLTLDITGLCGFHRYRNSFYR--DTQ | 172 |
| ABS73124.1 | DYHSMMTDIAVQLIQKWARLN-PDEAVDVPADMTRLTLDITGLCGFNRYRNSFYR--ETP | 172 |
| ABS74786.1 | GYHSMMLDIAMQLVQKWSRLN-PNEEIDVAEDMTRLTLDITGLCGFHRYRNSFYR--DTQ | 172 |
| EKE46398.1 | DYHSMMTDIAVQLIQKWARLN-PDEAVDVPADMTRLTLDITGLCGFNRYRNSFYR--ETP | 172 |
| EKE48022.1 | GYHSMMLDIAMQLVQKWSRLN-PNEEIDVAEDMTRLTLDITGLCGFHRYRNSFYR--DTQ | 172 |
| CCG48683.1 | DYHSMMTDIAVQLIQKWARLN-PDEAVDVPADMTRLTLDITGLCGFNRYRNSFYR--ETP | 172 |
| AFJ60789.1 | DYHSMMTDIAVQLIQKWARLN-PDEAVDVPADMTRLTLDITGLCGFNRYRNSFYR--ETP | 179 |
| AFJ62808.1 | GYHSMMLDIAMQLVQKWSRLN-PNEEIDVAEDMTRLTLDITGLCGFHRYRNSFYR--DTQ | 172 |
| EEK66903.1 | DYHAMMVDLAVQLVQKWARLN-PNESVDVPEDMTRLTLDITGLCGFNRYRNSFYR--ETP | 187 |
| EJQ52935.1 | DYHAMMVDIQVQLVQKWARLN-PNENVDPEDMTRLTLDITGLCGFNRYRNSFYR--ETP  | 173 |
| EJS69574.1 | DYHAMMVDIQVQLVQKWARLN-PNENVDPEDMTRLTLDITGLCGFNRYRNSFYR--ESS  | 173 |
| EJV63294.1 | DYHAMMVDIQVQLVQKWARLN-PNENVDPEDMTRLTLDITGLCGFNRYRNSFYR--ESS  | 173 |
| EKF35778.1 | GYHEMMLDIASQLVQKQRTG-RDEEIEVAEDMTKLTLDITGLCGFDFRNSFYK--ENQ   | 172 |
| EGP08506.1 | SYHPSMVDIAEQLVKKWERLN-ADDEIDVVHDMTALTLDTIGLCGFDYRNSFYR--EDY  | 175 |
| BAL78328.1 | SYHPSMVDIAEQLVKNWERLN-ADDEIDVVHDMTALTLDTIGLCGFDYRNSFYR--RDY  | 175 |
| BAC48147.1 | SYHPSMVDIAEQLVQKWERLN-ADDEIDVVHDMTALTLDTIGLCGFDYRNSFYR--RDY  | 175 |
| BAL12135.1 | SYHPSMVDIAEQLVKNWERLN-ADDEIDVVHDMTALTLDTIGLCGFEYRNSFYR--RDY  | 175 |

|            |                                                               |     |
|------------|---------------------------------------------------------------|-----|
| CCE00185.1 | SYHASMVDIAEQLVKKWERLN-ADEEIDVVHDMTALTLDTIGLCGFDYRFNSFYR--RDY  | 175 |
| EIG57609.1 | SYHPSMVDIAEQLVGKWERLN-ADDEIDVVHDMTALTLDTIGLCGFDYRFNSFYR--RDY  | 175 |
| EHR02046.1 | SYHPSMVDIAEQLVGKWERLN-ADDEIDVVHDMTALTLDTIGLCGFDYRFNSFYR--RDY  | 175 |
| EJN11211.1 | SYHPSMVDIAEQLVQKWERLN-ADDEIDVVHDMTALTLDTIGLCGFEYRFNSFYR--RDY  | 175 |
| CCF15606.1 | GYHSMMVDIAVQLIQKWARLN-PDESIDVPEDMTRLTLDTIGLCGFNYRFNSFYR--EQP  | 114 |
| CCF12687.1 | GYHSMMVDIALQLIQKWARLN-PNESIDVPGDMTRLTLDTIGLCGFNYRFNSFYR--ETH  | 172 |
| ABB05850.1 | SMFDKMVDIADQMFLHWERFG-PETPVDVSDHMTRLTLDTIALCAFDCRFNSFYR--EDQ  | 172 |
| EHP43606.1 | GYFDVMLRVANRLVDKWDQRG-ADTDIPIADDMTRLTLDTIALSGFGYDFDSFAR--EQL  | 196 |
| ABF10339.1 | AYFDVMLRVANRLVDKWDQRG-PDADIAVADDMTRLTLDTIALAGFGYDFASFAS--DEL  | 178 |
| CAJ95800.1 | GYFDVMLRVANRLVDKWDQQG-PDADIAVADDMTRLTLDTIALSGFGYDFESFAS--TEL  | 198 |
| AEI79937.1 | GYFDVMLRVANRLVDKWDQRG-PDADIAVADDMTRLTLDTIALSGFGYDFESFAS--ANL  | 198 |
| AFD27790.1 | GMFGQMVDVCEQMLLRWERFG-PAAEFDVADQMTRLTLDTIALCAFDRFNSFYR--ERM   | 174 |
| ABC62112.1 | SYLPMMTDIASQLMLKWERLN-SDDVIDVPMDMVRLTLDTIGVCGFGYRFNSFYR--EDF  | 175 |
| EAQ27850.1 | SYLPMMTDIATQLVMKWERMN-SDDVIDVPMDMVRLTLDTIGVCGFGYRFNSFYR--EDF  | 175 |
| EIT84377.1 | GYHPMMVDIAQQLLQKWARLN-PNEHIDVPEDMTRLTLDTIGLCGFNYRFNSFYR--ERS  | 172 |
| CCG43686.1 | GYHNKMVDLASQLIQKWARLN-PNEEVEVPEDMTRLTLDTIGLCGFNYRFNSFYR--ERS  | 172 |
| ABX05160.1 | NYFDDMLDIADQLFTKWERQG-PETDFDVADNMTRLTLDTIALCGFGYRFNSFYQ--REM  | 175 |
| BAJ96920.1 | GMFEGMMDIAEQLVLRWKRFG-EDSIINVSNEYTRVTLDTIGLCAFNYRFNSFYQ--NEL  | 170 |
| GAB96874.1 | GMYDGMADIAEQLMLKWERLG-PQADIDVVHDFTRLTLDTIALCSFSYRFNSFYR--ESM  | 211 |
| EFH80345.1 | GYIPMMQDIAEQLLGKWERMN-ANEEIDVSDMTRLTLDTIGLCGFDYRFNSFYR--EDL   | 176 |
| EFH88481.1 | NYEPMVDAAEQLMKWEHLN-PEDLINVPDDMTRVTLLETIGLCGFSYHFHAITR--EQM   | 168 |
| EAW32450.1 | NYFPMMLEIAEQMMTRWGQLN-AHDEIDVPADMVRLTLDTIGLCGFDYRFNSFSR--DEP  | 170 |
| EIZ82104.1 | AMFDRMEDIADQMLLRWERFG-PEATIDVADSMTRLTLDTIALCAFDRFNSFYQ--NEM   | 172 |
| AEV70722.1 | NYHGAMLDISSQLIARWDARVG-HALVDASTDLQKLAMDTVALAGFGARFHSFDH--DGL  | 178 |
| EFC41452.1 | DMYPQMYDIAEQLCTKWERLG-EHSVIDIVDNMTRLTLDTIALCAFNYRFNSFYH--NEM  | 201 |
| ACV78954.1 | RLYPSIVDPIQQLAERLVRME-PGSDVDVPTLTSAMTLDVVGLCLFSYRFGNVYT--NTP  | 170 |
| ACV78964.1 | EYMPRMLDIAGQLMGKWSRLN-PDEEVNVPVDMTSLTLDTIALCGFDYRFNSYR--DTQ   | 176 |
| ACV81379.1 | GYLPRMVDIAGQLMDKWSRLN-PDDEVNVPADM TALTLDTIALCGFGYRFNSLYR--DTP | 175 |
| EIZ78677.1 | AMFDRMEEIADQMLLRWERFG-PDAVIDVADNMTRLTLDTIALCAFDRFNSFYQ--NEM   | 170 |
| EJW15291.1 | GYFDKMLDLAMQLIQKWSRLN-PDDQIEVPEDMTRLAMDITIGLCGFNYRFNSFYR--DQP | 171 |
| EJW16173.1 | GYHEMMVDIAVQLIQKWSRLN-PDESIDVPEDMTRLTLDTIGLCGFNYRFNSFYR--DQP  | 174 |
| EHQ58913.1 | GYFDKMLEIAIQLVQKWSRLN-PDESVDVPEDMTRLALDITIGLCGFNYRFNSFYR--EQS | 171 |
| EHQ59900.1 | GYHTMMVDIAQQLVQKWARLN-PDESVDVPEDMTRLTLDTIGLCGFNYRFNSFYR--EQP  | 172 |
| EHB66924.1 | GYHTKMLDIAMQLIQKWARLN-PDETVDVPADMTRLTLDTIGLCGFNYRFNSFYR--EDN  | 172 |
| AFH60445.1 | GYHAMMVDLAVQLVQKWARLN-PDESVEVGEDMTRLTLDTIGLCGFNYRFNSFYR--DQP  | 172 |
| AEI42011.1 | GYHAMMVDLAVQLVQKWARLN-PDESVEVGEDMTRLTLDTIGLCGFNYRFNSFYR--DQP  | 172 |
| ADO57681.1 | GYHNMLDLAVQLVQKWSRLN-PDESVEVPEDMTRLTLDTIGLCGFNYRFNSFYR--DQP   | 172 |
| EGG32133.1 | GYHTKMVDIAMQLIQKWARLN-PDETVDVPADMTRLTLDTIGLCGFNYRFNSFYR--EDN  | 173 |

EGL17662.1 GYHNMMVDIAVQLIQKWSRLN-ADEIIDVPEDMTRLTLDTIGLCGFNYRFNSFYR--EQP 173  
ACX65034.1 GYHTKMVDIAMQLIQKWARLN-PDETVDVPADMTRLTLDTIGLCGFNYRFNSFYR--EDN 173  
ACT11327.1 SMFDKMLDISEQMFLRWERFG-PDVIDDVADNMTRLTLDTIALCGFDYRFNSFYR--DDL 172  
AEA28016.1 GYLPMMIDIALQLMQKWERLN-PGEQVDVTADMTRLTLDTIALCGFGYRFNSFYR--NTQ 178  
EFP68091.1 GYFDVMLEVANALAEKWARQG-PDADIPVADDMTRLTLDTISLAGFGYRFDSFNT--PEL 185  
EGY61507.1 GYFDVMLEVANALAEKWARQG-PDADIPVADDMTRLTLDTISLAGFGYRFDSFNT--PEL 185  
EIE85788.1 AYQVEMAI IAQQTVKVFEQFK-PHEPVEI IEWTTNLTFFETIGRIGFGYFNLLVGRGQEQ 256  
EIE92534.1 AYQGEMGIIAQQTMKIFEQYR-PDEPVEILDWTTNLTFFETIGRIGFGYEFNLLVDRDQEQ 256  
BAE46296.1 NYHPSMLRALGGLTDSWDRVADAGETIDASSDANKLALDVIGLAGFGYDFASFIG---EE 226  
BAH31604.1 SYHRTMLDVAGELVDHWDSDR-DSDSPIDVSADMTKLTLETIGRTGFSYSFDSFER--EEQ 181  
EEN84644.1 SYHRTMLDVARELVDHWDSDR-ESDSPIDVSADMTKLTLETIGRTGFSYSFDSFER--EEQ 181  
EEN88978.1 KYHPSMLRALDGLMASWDAAAAAGGKIDATADANKLALDVIGLAGFGYDFASFDG---DE 266  
ABG96413.1 SYHRTMLDVAGELTEHWDER-VDGSPVDVSSDMTKLTLETIGRTGFSYSFDSFGR--ERP 213  
BAH52971.1 SYHRTMLDVAGELTQHWQDR-VDGTPVDVSSDMTKLTLETIGRTGFSYSFDSFTR--ERP 180  
EHI44575.1 SYHRTMLDVAGELTERWDER-VDGTPVDVSSDMTKLTLETIGRTGFSYSFDSFTR--ERP 215  
EID73168.1 SYHRTMLDVAGELAEHWDER-VDGSPVDVSSDMTKLTLETIGRTGFSYSFDSFRR--ERP 180  
EHK83749.1 GYHDSMLTVVDRLVDSWDSAAAADGEYVDVPKSMTSLTFDVI GRCGFSYDFDSFGR--TEP 158  
EJI96173.1 SYHRTMLDVAGELTEHWDER-VDGSPVDVSSDMTKLTLETIGRTGFSYSFDSFGR--ERP 180  
ABI79384.1 SYHDAMVDCVDQLCTYWTESA-ARGPVDVSSDMNRLTLEVI GRTGFGYSFDSFAP---GR 208  
CAR47816.1 SYHDAMVECIDLQLCAYWADTA-SGEPVDISSDMNRLTLEVI GRTGFGYSFNSFAP---GR 210  
AEK26937.1 GYHDSMLTVVDRLVDSWDSAAAADGEYVDVPKSMTSLTFDVI GRCGFSYDFDSFGR--TEP 190  
ABE39056.1 SYHPSMVDIAEQLVKKWERLN-ADDEIDVVHDMTALTLDTIGLCGFNYRFNSFYR--RDY 175  
ABD08340.1 SYHPSMVDIAEQLVKKWERLN-ADDEIDVVHDMTALTLDTIGLCGFNYRFNSFYR--RDY 175  
CAM03474.1 TYHPVMLRVARRLLDSWDRAAAAASAPVDV PDDMTRMTLDTIGLAGFGDFGFSFGR--AEP 171  
EJF54063.1 DMFDKMYDVAEQLCIKLERLG-PEEPFNVPANMTRLTLDTIALCAF DYRFNSFYK--NDM 186  
AFC23737.1 DMFDKMYDVAEQLCVKLERLG-PDEPFNVPANMTRLTLDTIALCAF DYRFNSFYK--NEM 174  
ADG98903.1 NYHASIRGAVEELVEVWAEDARSGAWVDVDSMNKLTLEVI SRAGFGHSFNLLSS--REE 182  
EGI54680.1 SMFDRMYDIAEQMMVRWERFG-ESATIDVADNMTRLTLDTIALCAF DYRFNSFYQ--DQM 169  
AEW97204.1 TYHPTMLRVAKRLIAAWDTALADGAPVDVADDMTRMTLDTIGLAGFGYDFGFSFR--GEP 188  
CAJ88567.1 GYHVMLLDVAARLTDHWDRAGAAGRTVDVPGDMTKLTLETIARTGFGHDFGFSFER--SRP 197  
BAC68285.1 GYFGQMLEIAQNLVKGWERKE-G-QPVNITDDYTRTLTLDTIALSGFGYRFDSFAK--EDL 178  
BAC75137.1 GYHPMMLAVTERLIDHWDREQTAGRAVDVPGDMTKLTLETIARTGFGHDFGFSFER--ARP 193  
EDY51256.1 AYHPTMVTVARRVLD AWRNAG--TPVDVPEDMTRLTLDTIGLCGF GHDFECFER--TTP 158  
EFG07822.1 AYHPTMVTVARRVLD AWRNAG--TPVDVPEDMTRLTLDTIGLCGF GHDFECFER--TTP 190  
EHN78335.1 GYHVMLLDVAARLTGHWDLAEASGRAVDVPGDMTKLTLETIARTGFGHDFGFSFER--ARP 197  
CAB66201.1 GYHVMLLDVAARLTGHWDLAEASGRAVDVPGDMTKLTLETIARTGFGHDFGFSFER--SRL 197  
EGG48117.1 GYHPMMLDVAERLLDRWDAEERAGRPVDV PADMTKLTLETIARTGFGHDFGFSFER--PRP 204  
EFL20831.1 GYHATMLKVARELIGKWDRAAG-TEPVDVAADMTRLTFDTIGLCGF GYDFESFGR--DET 183

|            |                                                               |     |
|------------|---------------------------------------------------------------|-----|
| EFL28515.1 | TYHPVMLQVARRVIDAWDARAASGEPVAVTDDMTRMTLDTIGLAGFGYDFGSFDR--DEP  | 179 |
| AEY93311.1 | GYHGMMLSVADRRLTDHWRHLAAGRTVDVPGDMTRLTLETIARTGFGHDFGSFER--DRP  | 196 |
| AEY93321.1 | TYHPVMLKVARRLIDAWDRAARAGRPVDVPPDDMTRMTLDTIGLAGFDYDFGSFER--AEP | 177 |
| EFD71156.1 | GYHVMMLDVAARLTGHWDLAEASGRAVDVPGDMTKLTLETIARTGFGHDFGSFER--SRL  | 197 |
| CBG67789.1 | GYHATMLKVARELIGKWDGAAG-TEPVDVAEDMTRLTFDTIGLCGFGHDFESFGR--PEP  | 178 |
| CBG68112.1 | GYHPMMLDVAERLIEHWDREETAGSAVDVPGDMTKLTLETIARTGFGHDFGSFER--TRP  | 193 |
| EFL10082.1 | RYHATMLEVAGELTAAWDRA---TGPVDVAADMTRLTLETIGLAGFGYRFGSFER--AEP  | 210 |
| EFF88741.1 | SYHAPMLRVARSLIGKWDQADG--GPVDVAADMTRLTFDTIGMCGFGDFESFSR--DRA   | 177 |
| EDY58112.1 | AYHPMMLAVAGRLTDHWDREQTAGRSDVPGDMTKLTLETIARTGFGHDFGSFER--DRP   | 193 |
| EFL36674.1 | GYHPMMLDVARRLTEHWDRAAGAGRTVDVPGDMTKLTLETIARTGFGHDFGSFER--TRP  | 206 |
| EFL36680.1 | TYHPVMLRVAQRRLIASWDRDARAGQPVDVPGDMTRMTLDTIGLAGFGYDFGSFER--AEP | 227 |
| EFE65335.1 | GYHPMMLDVAERLTDHWDRAAAAAGRTVDVPGDMTRLTLETIARTGFGHDFGSFER--SRP | 194 |
| EGX54696.1 | GYHPMMLAVAERLTDHWDLAAAARGQSVDVPGDMTKLTLETIARTGFGHDFGSFER--SRP | 194 |
| ACZ89135.1 | NYFDDMIDIADQMLTKWERLG-ADQDIDVADNMTRLTLDTIALSGFGYRFNSFYQ--REM  | 175 |
| ABD83817.1 | SYHPSMVDIAEQLVKKWERLN-ADDEIDVVHDMTALTLDTIGLCGFDYRFNSFYR--RDY  | 175 |
| ADU39615.1 | AYHPMMLDIAGQLVTKWERLN-FDEEVDVVRDMTALTLDTIGLCGFGYRFNSFYR--EGF  | 174 |
| EJL72014.1 | AYHPMMLDIAGQLVTKWERLN-FDEEVDVVRDMTALTLDTIGLCGFGYRFNSFYR--EGF  | 174 |

|                        |                                                                |     |
|------------------------|----------------------------------------------------------------|-----|
| sp P14779.2 CPXB_PRIM2 | HPFITSMVRLDEAMNKLQRAN--PDDPAYDENKRQFQEDIKVMNDLVDKIIADRKASGE    | 229 |
| ADF40088.1             | HPFITSMVRLDEAMNKLQRAN--PDDPAYDENKRQFQEDIKVMNDLVDKIIADRKASGE    | 229 |
| ADE70259.1             | HPFITSMVRLDEAMNKLQRAN--PDDPAYDENKRQFQEDIKVMNDLVDKIITDRKASGE    | 229 |
| AEN88827.1             | HPFITSMVRLDEAMNKLQRAN--PDDPAYDENKRQFQEDIKVMNDLVDKIIADRKASGE    | 229 |
| KFN05180.1             | HPFITSMVRLDEAMNKLQRAN--PDDPAYDENKRQFQEDIKVMNDLVDKIIADRKASGE    | 229 |
| ACZ37122.1             | HPFITSMVRLDEAMNKLQRAN--PDDPAYDENKRQFQEDIKVMNDLVDKIIADRKASGE    | 229 |
| ADA57055.1             | HPFITSMVRLDEAMNKLQRAN--PDDPAYDENKRQFQEDIKVMNDLVDKIIADRKASGE    | 229 |
| ADA57058.1             | HPFITSMVRLDEAMNKLQRAN--PDDPAYDENKRQFQEDIKVMNDLVDKIIADRKASGE    | 229 |
| ADA57059.1             | HPFITSMVRLDEAMNKLQRAN--PDDPAYDENKRQFQEDIKVMNDLVDKIIADRKASGE    | 229 |
| ADA57061.1             | HPFITSMVRLDEAMNKLQRAN--PDDPAYDENKRQFQEDIKVMNDLVDKIIADRKASGE    | 229 |
| ADA57062.1             | HPFITSMVRLDEAMNKLQRAN--PDDPAYDENKRQFQEDIKVMNDLVDKIIADRKASGE    | 229 |
| ADA57068.1             | HPFITSMVRLDEAMNKLQRAN--PDDPAYDENKRQFQEDIKVMNDLVDKIIADRKASGE    | 229 |
| AAT62301.1             | HPFITSMTRALDEAMHQLQRD--IEDKLMWRTKRQFQHDIQSMFSLVDNIIAERKSSSEN   | 231 |
| AAM54108.1             | HPFVDAMVRSLSVEAGERAERLP--GVQPFLVGRNQRYRDDIATMNRIADGIVAARAALPA  | 234 |
| EFQ83738.1             | HPFVPAMISALRTAQRLATLDTAPGGALIKRRLRRRNAPHQAYVDDLIDGVVAERRAGP-   | 233 |
| EFL88452.1             | HPFIDALNRTLETTCM-MQRGLP--FEETLLRKRHLHOMETDVFDMNNLVDDIIRERRSGRG | 230 |
| BAF89518.1             | PAFVEAMNVVLTDMAEAPKRL--PEVIFYHEARKTRAAADKIMLEEVETIIAERRFAMAA   | 321 |
| CBI43648.1             | HPFITSMLRALQEAMRQSQRHS--LQDKLMIKTRHQFQODIEVMNELVDRIIAERRENPD   | 230 |
| AEB22839.1             | HPFINSMVRLDEAMHQMQRD--VQDKLMIKTRHQFHHDIQAMFSLVDSIIAERRSDGG     | 230 |
| EDT22025.1             | HPFITSMTRALDEAMHQLQRD--IEDKLMWRTKRQFQHDIQSMFSLVDNIIAERKSSSEN   | 231 |
| AFH84458.1             | HPFITSMTRALDEAMHQLQRD--IEDKLMWRTKRQFQHDIQSMFSLVDNIIAERKSSSEN   | 239 |
| ADP31197.1             | HPFINSMVRLDEAMHQMQRD--FQDKLMVRTKRQFHHDIQTMFSLVDSIIAERKADGD     | 230 |
| ACP19384.1             | HPFITSMTRALDEAMHQLQRD--IEDKLMWRTKRQFQHDIQSMFSLVDNIIAERKSSGD    | 231 |
| ADL27534.1             | HPFITSMTRALDEAMHQLQRD--IEDKLMWRTKRQFQHDIQSMFSLVDNIIAERKSSGD    | 231 |
| ACO29732.1             | HPFITSMTRALDEAMHQLQRD--IEDKLMWRTKRQFQHDIQSMFSLVDNIIAERKSSSEN   | 231 |
| EDX65100.1             | HPFITSMTRALDEAMHQLQRD--IEDKLMWRTKRQFQHDIQSMFSLVDNIIAERKSSSEN   | 231 |
| EEK61456.1             | HPFITSMTRALDEAMHQLQRD--IEDKLMWRTKRQFQHDIQSMFSLVDNIIAERKSSGD    | 231 |
| EEL16232.1             | HPFITSMTRALDEAMHQLQRD--IEDKLMWRTKRQFQHDIQSMFSLVDNIIAERKSSSEN   | 239 |
| EDZ53094.1             | HPFITSMTRALDEAMHQLQRD--IEDKLMWRTKRQFQHDIQSMFSLVDNIIAERKSSGD    | 231 |
| EEL81346.1             | HPFITSMSRALDEAMHQLQRD--IEDKLMWRTKRQFQHDIQSMFSLVDNIIAERKSSGN    | 245 |
| EEL87105.1             | HPFITSMSRALDEAMHQLQRD--IEDKLMWRTKRQFQHDIQSMFSLVDNIIAERKSSGN    | 245 |
| EEL75761.1             | HPFITSMTRALDEAMHQLQRD--IEDKLMWRTKRQFQHDIQSMFSLVDNIIAERKSSGD    | 172 |
| ACK88541.1             | HPFITSMTRALDEAMHQLQRD--IEDKLMWRTKRQFQHDIQSMFSLVDNIIAERKSSEK    | 231 |
| EJQ05303.1             | HPFITSMTRALDEAMHQLQRD--IEDKLMWRTKRQFQHDIQSMFSLVDNIIAERKSSGN    | 231 |
| EEK50040.1             | HPFITSMTRALDEAMHQLQRD--IEDKLMWRTKRQFQHDIQSMFSLVDNIIAERKSSGN    | 231 |
| AAS42149.1             | HPFITSMTRALDEAMHQLQRD--IEDKLMWRTKRQFQHDIQSMFSLVDNIIAERKSSGN    | 231 |
| AAP10153.1             | HPFITSMTRALDEAMHQLQRD--IEDKLMWRTKRQFQHDIQSMFSLVDNIIAERKSSGD    | 231 |
| EEK83466.1             | HPFITSMSRALDEAMHQLQRD--IEDKLMWRTKRQFQHDIQSMFSLVDNIIAERKSSGN    | 239 |

|            |                                                              |     |
|------------|--------------------------------------------------------------|-----|
| ACK63698.1 | HPFITSMTRALDEAMHQLQRLD--IEDKLMWRTKRQFQHDIQSMFSLVDNIIAERKSSGD | 172 |
| EJS57156.1 | HPFITSMSRALDEAMHQLQRLD--IEDKLMWRTKRQFQHDIQSMFSLVDNIIAERKSSGN | 231 |
| EJS56605.1 | HPFITSMSRALDEAMHQLQRLD--IEDKLMWRTKRQFQHDIQSMFSLVDNIIAERKSSGN | 231 |
| EJS68951.1 | HPFITSMVRLDEAMHQTQRLD--IQDKLMVRTKRQFQHDIQAMFSLVDNIIAERKANGN  | 230 |
| EJQ10567.1 | HPFITSMTRALDEAMHQLQRLD--IEDKLMWRTKRQFQHDIQSMFSLVDNIIAERKSSGD | 231 |
| EJQ13433.1 | HPFITSMSRALDEAMHQLQRLD--IEDKLMWRTKRQFQHDIQSMFSLVDNIIAERKSSGN | 231 |
| EJQ20399.1 | HPFITSMTRALDEAMHQLQRLD--IEDKLMWRTKRQFQHDIQSMFSLVDNIIAERKSSGD | 231 |
| EJQ30236.1 | HPFITSMTRALDEAMHQLQRLD--IEDKLMWRTKRQFQHDIQSMFSLVDNIIAERKSSGD | 231 |
| EJQ51278.1 | HPFITSMVRLDEAMHQTQRLD--IQDKLMVRTKRQFQHDIQAMFSLVDNIIAERKANGN  | 230 |
| EEL10858.1 | HPFITSMTRALDEAMHQLQRLD--IEDKLMWRTKRQFQHDIQSMFSLVDNIIAERKSSGD | 231 |
| EEL05393.1 | HPFITSMSRALDEAMHQLQRLD--IEDKLMWRTKRQFQHDIQSMFSLVDNIIAERKSSGN | 245 |
| EEK94080.1 | HPFITSMTRALDEAMHQLQRLD--IEDKLMWRTKRQFQHDIQSMFSLVDNIIAERKSSGD | 234 |
| EEK99882.1 | HPFITSMTRALDEAMHQLQRLD--IEDKLMWRTKRQFQHDIQSMFSLVDNIIAERKSSGN | 234 |
| EEK55784.1 | HPFITSMTRALDEAMHQLQRLD--IEDKLMWRTKRQFQHDIQSMFSLVDNIIAERKSSGN | 239 |
| ADK05784.1 | HPFITSMTRALDEAMHQLQRLD--IEDKLMWRTKRQFQHDIQSMFSLVDNIIAERKSSGN | 231 |
| AAU17340.1 | HPFITSMTRALDEAMHQLQRLD--IEDKLMWRTKRQFQHDIQSMFSLVDNIIAERKSSGN | 231 |
| EEL64394.1 | HPFITSMTRALDEAMHQLQRLD--IEDKLMWRTKRQFQHDIQSMFSLVDNIIAERKSSGD | 231 |
| AEW56259.1 | HPFITSMTRALDEAMHQLQRLD--IEDKLMWRTKRQFQHDIQSMFSLVDNIIAERKSSGN | 231 |
| AFQ11690.1 | HPFITSMTRALDEAMHQLQRLD--IEDKLMWRTKRQFQHDIQSMFSLVDNIIAERKSSGN | 231 |
| EAL16831.1 | HPFITSMTRALDEAMHQLQRLD--IEDKLMWRTKRQFQHDIQSMFSLVDNIIAERKSSGN | 231 |
| ACK94296.1 | HPFITSMSRALDEAMHQLQRLD--IEDKLMWRTKRQFQHDIQSMFSLVDNIIAERKSSGD | 231 |
| EDZ58760.1 | HPFITSMTRALDEAMHQLQRLD--IEDKLMWRTKRQFQHDIQSMFSLVDNIIAERKSSGN | 231 |
| EJV84218.1 | HPFITSMSRALDEAMHQLQRLD--IEDKLMWRTKRQFQHDIQSMFSLVDNIIAERKSSGS | 231 |
| EJQ69212.1 | HPFITSMSRALDEAMHQLQRLD--IEDKLMWRTKRQFQHDIQSMFSLVDNIIAERKSSGN | 231 |
| EJQ80339.1 | HPFITSMSRALDEAMHQLQRLD--IEDKLMWRTKRQFQHDIQSMFSLVDNIIAERKSSGN | 231 |
| EJV81602.1 | HPFITSMSRALDEAMHQLQRLD--IEDKLMWRTKRQFQHDIQSMFSLVDNIIAERKSSGN | 231 |
| EJQ95474.1 | HPFITSMTRALDEAMHQLQRLD--IEDKLMWRTKRQFQHDIQSMFSLVDNIIAERKSSGN | 231 |
| EEK44229.1 | HPFITSMTRALDEAMHQLQRLD--IEDKLMWRTKRQFQHDIQSMFSLVDNIIAERKSSGN | 239 |
| EEK88560.1 | HPFITSMTRALDEAMHQLQRLD--IEDKLMWRTKRQFQHDIQSMFSLVDNIIAERKSSGD | 231 |
| EJR07451.1 | HPFITSMSRALDEAMHQLQRLD--IEDKLMWRTKRQFQHDIQSMFSLVDNIIAERKSSGD | 231 |
| EJR16542.1 | HPFITSMTRALDEAMHQLQRLD--IEDKLMWRTKRQFQHDIQSMFSLVDNIIAERKSSGN | 231 |
| BAL18840.1 | HPFITSMTRALDEAMHQLQRLD--IEDKLMWRTKRQFQHDIQSMFSLVDNIIAERKSSGN | 231 |
| EDX69960.1 | HPFITSMTRALDEAMHQLQRLD--IEDKLMWRTKRQFQHDIQSMFSLVDNIIAERKSSGN | 231 |
| ACM13462.1 | HPFITSMTRALDEAMHQLQRLD--IEDKLMWRTKRQFQHDIQSMFSLVDNIIAERKSSGN | 231 |
| EEK75631.1 | HPFITSMTRALDEAMHQLQRLD--IEDKLMWRTKRQFQHDIQSMFSLVDNIIAERKSSGN | 231 |
| EEL25491.1 | HPFITSMTRALDEAMHQLQRLD--IEDKLMWRTKRQFQHDIQSMFSLVDNIIAERKSSGD | 172 |
| EEL21990.1 | HPFITSMSRALDEAMHQLQRLD--IEDKLMWRTKRQFQHDIQSMFSLVDNIIAERKSSGN | 239 |
| EEL33825.1 | HPFITSMSRALDEAMHQLQRLD--IEDKLMWRTKRQFQHDIQSMFSLVDNIIAERKSSGN | 239 |

|                        |                                                               |     |
|------------------------|---------------------------------------------------------------|-----|
| EEL44933.1             | HPFITSMTRALDEAMHQLQRLD--IEDKLMWRTKRQFQHDIQSMFSLVDNIIAERKSSSEN | 239 |
| EEL50167.1             | HPFITSMVRALDEAMHQTQRLD--IQDKLMVRTKRQFQHDIQAMFSLVDNIIAERKANGN  | 309 |
| EJR22930.1             | HPFITSMSRALDEAMHQLQRLD--IEDKLMWRTKRQFQHDIQSMFSLVDNIIAERKSSGD  | 231 |
| EJP91231.1             | HPFITSMSRALDEAMHQLQRLD--IEDKLMWRTKRQFQHDIQSMFSLVDNIIAERKSSGD  | 231 |
| EJR37623.1             | HPFITSMTRALDEAMHQLQRLD--IEDKLMWRTKRQFQHDIQSMFSLVDNIIAERKSNGN  | 231 |
| EJR50635.1             | HPFITSMTRALDEAMHQLQRLD--IEDKLMWRTKRQFQHDIQSMFSLVDNIIAERKSSGN  | 231 |
| EJR64551.1             | HPFITSMSRALDEAMHQLQRLD--IEDKLMWRTKRQFQHDIQSMFSLVDNIIAERKSNGN  | 231 |
| EJR75620.1             | HPFITSMTRALDEAMHQLQRLD--IEDKLMWRTKRQFQHDIQSMFSLVDNIIAERKSSGD  | 231 |
| EJR82049.1             | HPFITSMTRALDEAMHQLQRLD--IEDKLMWRTKRQFQHDIQSMFSLVDNIIAERKSSGD  | 231 |
| EJR83659.1             | HPFITSMTRALDEAMHQLQRLD--IEDKLMWRTKRQFQHDIQSMFSLVDNIIAERKSSGD  | 231 |
| EJR91135.1             | TPFIVSMIRALDEAMHTGIRLP--IQNQLMVLTKRQFKRDIQVMYSLVDKIIEMERKSRGD | 229 |
| EJR97241.1             | HPFITSMTRALDEAMHQLQRLD--IEDKLMWRTKRQFQHDIQSMFSLVDNIIAERKSNGN  | 231 |
| EJS05852.1             | HPFITSMSRALDEAMHQLQRLD--IEDKLMWRTKRQFQHDIQSMFSLVDNIIAERKSSGN  | 231 |
| EDX58768.1             | HPFITSMTRALDEAMHQLQRLD--IEDKLMWRTKRQFQHDIQSMFSLVDNIIAERKSSSEN | 231 |
| AAU24352.1             | HPFIESMVRGLSEAMRQTKRFP--LQDKLMIQTKRRFNSDVESMFSLVDRIIADRKQAES  | 230 |
| ABY44122.1             | HPFITSMSRALDEAMHQLQRLD--IEDKLMWRTKRQFQHDIQSMFSLVDNIIAERKSSGN  | 231 |
| EDW23201.1             | HPFIESMVNGLSEAMDQASRLP--VADKLMIKRRKKFEENVDFMKQLVDDIIQERKK-QD  | 229 |
| ABV62358.1             | HPFIESMLNGLNEAMEQASRLP--VADKLMIKRRKKFEENVDFMKTLVDDIIQERRK-QD  | 229 |
| EIF12263.1             | HPFINSMVRALDEAMHQMORLD--VQDKLMIRTKRQFHHDIQAMFSLVDSIIAERRS-GG  | 229 |
| EIF14027.1             | HPFITSMLRALQEAMRQSQRHS--LQDKLMIKTRHQFQQDIEEMNSLVDRIIAERRENPD  | 230 |
| EHL75405.1             | HPFITSMTRALDEAMHQLQRLD--IEDKLMWRTKRQFQHDIQSMFSLVDNIIAERKSSGD  | 231 |
| EJD67577.1             | HPFINSMVRALDEAMHQMORLD--VQDKLMIRTKRQFHHDIQAMFSLVDSIIAERRS-GG  | 229 |
| EJD68347.1             | HPFITSMLRALQEAMRQSQRHS--LQDKLMIKTRHQFQQDIEEMNSLVDRIIAERRENPD  | 230 |
| EFV73436.1             | HPFIESMVRGLSEAMRQTKRFP--LQDKLMIQTKRRFNSDVESMFSLVDRIIADRKQAES  | 244 |
| CBY93692.1             | HPFITSMTRALDEAMHQLQRLD--IEDKLMWRTKRQFQHDIQSMFSLVDNIIAERKSSGN  | 231 |
| AFI27355.1             | HPFINSMVRALDEAMHQMORLD--FQDKLMVRTKRQFHHDIQTMFSLVDSIIAERRANGD  | 230 |
| AFI29229.1             | HPFITSMLRALKEAMNQSKRLG--LQDKMMVKTKLQFQKDIEVMNSLVDRMIAERKANPD  | 230 |
| EIL85422.1             | HPFIESMLKGLNEAMDQSKRWP--IADKLMIKRRKEFEQNVDFMKRLVDDIIQERKK-QD  | 229 |
| ADV93500.1             | HPFITSMLRALKEAMNQSKRLG--LQDKMMVKTKLQFQKDIEVMNSLVDRMIAERKANPD  | 230 |
| ADV95715.1             | HPFINSMVRALDEAMHQMORLD--VQDKLMVRTKRQFRHDIQTMFSLVDSIIAERRANGD  | 230 |
| BAI84248.1             | HPFINSMVRALDEAMHQMORLD--VQDKLMVRTKRQFRHDIQTMFSLVDSIIAERRANGD  | 230 |
| EFG90288.1             | HPFITSMLRALKEAMNQSKRLG--LQDKMMVKTKLQFQKDIEVMNSLVDRMIAERKANPD  | 230 |
| EFG91781.1             | HPFINSMVRALDEAMHQMORLD--FQDKLMVRTKRQFHHDIQTMFSLVDSIIAERRSNGD  | 230 |
| AEP85668.1             | HPFINSMVRALDEAMHQMORLD--FQDKLMVRTKRQFHHDIQTMFSLVDSIIAERRSNGD  | 230 |
| AEP87558.1             | HPFITSMLRALKEAMNQSKRLG--LQDKMMVKTKLQFQKDIEVMNSLVDRMIAERKANPD  | 230 |
| sp 008336.1 CYPB_BACSU | HPFITSMLRALKEAMNQSKRLG--LQDKMMVKTKLQFQKDIEVMNSLVDRMIAERKANPD  | 230 |
| sp 008394.1 CYPD_BACSU | HPFINSMVRALDEAMHQMORLD--VQDKLMVRTKRQFRYDIQTMFSLVDSIIAERRANGD  | 230 |
| AEP89812.1             | HPFINSMVRALDEAMHQMORLD--FQDKLMVRTKRQFHHDIQTMFSLVDSIIAERRSNGD  | 230 |

|            |                                                              |     |
|------------|--------------------------------------------------------------|-----|
| AEP91702.1 | HPFITSMLRALKEAMNQSKRLG--LQDKMMVKTKLQFQKDIEVMNSLVDRMIAERKANPD | 230 |
| EHA31094.1 | HPFITSMLRALKEAMNQSKRLG--LQDKMMVKTKLQFQKDIEVMNSLVDRMIAERKANPD | 232 |
| ADH07708.1 | HPFITSMLRALDEAMHQLQRLD--IEDKLMWRTKRQFQHDIQSMFSLVDNIIAERKSSGD | 231 |
| EEM28177.1 | HPFITSMLRALDEAMHQLQRLD--IEDKLMWRTKRQFQHDIQSMFSLVDNIIAERKSNGN | 231 |
| AFQ14162.1 | HPFITSMSRALDEAMHQLQRLD--IEDKLMWRTKRQFQHDIQSMFSLVDNIIAERKSSGD | 231 |
| EEM95517.1 | HPFITSMSRALDEAMHQLQRLD--IEDKLMWRTKRQFQHDIQSMFSLVDNIIAERKNSGD | 231 |
| EEN02344.1 | HPFITSMSRALDEAMHQLQRLD--IEDKLMWRTKRQFQHDIQSMFSLVDNIIAERKSSGD | 231 |
| AFU13781.1 | HPFITSMSRALDEAMHQLQRLD--IEDKLMWRTKRQFQHDIQSMFSLVDNIIAERKSNGN | 239 |
| EEM70897.1 | HPFITSMLRALDEAMHQLQRLD--IEDKLMWRTKRQFQHDIQSMFSLVDNIIAERKSSEN | 239 |
| ADY22413.1 | HPFITSMLRALDEAMHQLQRLD--IEDKLMWRTKRQFQHDIQSMFSLVDNIIAERKSSGN | 231 |
| EEM82895.1 | HPFITSMLRALDEAMHQLQRLD--IEDKLMWRTKRQFQHDIQSMFSLVDNIIAERKSSGD | 231 |
| EEM52818.1 | HPFITSMLRALDEAMHQLQRLD--IEDKLMWRTKRQFQHDIQSMFSLVDNIIAERKSSGD | 231 |
| EEM59126.1 | HPFITSMIRALDEAMHQLQRLD--IEDKLMWRTKRQFQHDIQSMFSLVDNIIAERKSSEN | 239 |
| EEM47193.1 | HPFITSMLRALDEAMHQLQRLD--IEDKLMWRTKRQFQHDIQSMFSLVDNIIAERKSSGD | 172 |
| EEM76899.1 | HPFITSMLRALDEAMHQLQRLD--IEDKLMWRTKRQFQHDIQSMFSLVDNIIAERKSSEN | 239 |
| EEM88909.1 | HPFITSMLRALDEAMHQLQRLD--IEDKLMWRTKRQFQHDIQSMFSLVDNIIAERKSSGN | 239 |
| EEM38196.1 | HPFITSMSRALDEAMHQLQRLD--IEDKLMWRTKRQFQHDIQSMFSLVDNIIAERKSSGD | 231 |
| EEM21858.1 | HPFITSMSRALDEAMHQLQRLD--IEDKLMWRTKRQFQHDIQSMFSLVDNIIAERKSSGN | 234 |
| ABK86139.1 | HPFITSMLRALDEAMHQLQRLD--IEDKLMWRTKRQFQHDIQSMFSLVDNIIAERKSSEN | 239 |
| EJQ37805.1 | HPFITSMSRALDEAMHQLQRLD--IEDKLMWRTKRQFQHDIQSMFSLVDNIIAERKSNGN | 231 |
| CCF04242.1 | HPFINSMVRALDEAMHQMORLD--VQDKLMIRTKRQFHHDIQAMFSLVDSIIAERRS-GG | 229 |
| CCF05972.1 | HPFITSMLRALQEAMRQSQRHS--LQDKLMIKTRHQFQODIEVMNELVDRIIAERRENPD | 230 |
| ABS73124.1 | HPFINSMVRALDEAMHQMORLD--VQDKLMIRTKRQFHHDIQAMFSLVDSIIAERRS-GG | 229 |
| ABS74786.1 | HPFITSMLRALQEAMRQSQRHS--LQDKLMIKTRHQFQODIEEMNSLVDRMIAERRENPD | 230 |
| EKE46398.1 | HPFINSMVRALDEAMHQMORLD--VQDKLMIRTKRQFHHDIQAMFSLVDSIIAERRS-GG | 229 |
| EKE48022.1 | HPFITSMLRALQEAMRQSQRHS--LQDKLMIKTRHQFQODIEVMNELVDRIIAERRENPD | 230 |
| CCG48683.1 | HPFINSMVRALDEAMHQMORLD--VQDKLMIRTKRQFHHDIQAMFSLVDSIIAERRS-GG | 229 |
| AFJ60789.1 | HPFINSMVRALDEAMHQMORLD--VQDKLMIRTKRQFHHDIQAMFSLVDSIIAERRS-GG | 236 |
| AFJ62808.1 | HSFITSMLRALQEAMRQAQRHS--LQDKLMIKTRHQFQODIEEMNSLVDRMIAERRENPD | 230 |
| EEK66903.1 | HPFITSMSRALDEAMHQLQRLD--IEDKLMWRTKRQFQHDIQSMFSLVDNIIAERKSNGN | 245 |
| EJQ52935.1 | HPFITSMSRALDEAMHQLQRLD--IEDKLMWRTKRQFQHDIQSMFSLVDNIIAERKSSGN | 231 |
| EJS69574.1 | HPFITSMSRALDEAMHQLQRLD--IEDKLMWRTKRQFQHDIQSMFSLVDNIIAERKSSGN | 231 |
| EJV63294.1 | HPFITSMSRALDEAMHQLQRLD--IEDKLMWRTKRQFQHDIQSMFSLVDNIIAERKSSGN | 231 |
| EKF35778.1 | HPFIESMLKGLNEAMDQSSRLP--IADKLMIKRRKEFEQNVDFMKQLVDDIIRERKT-QD | 229 |
| EGP08506.1 | HPFVGALVRSLETIM-MTRGLP--LENLFMRARRATLSEDDVFMNKMVDEIIAERRKNTD | 232 |
| BAL78328.1 | HPFVESLVRSLLETIM-MTRGLP--FEQLWMQKRRKTLGEDVAFMNMVDEIIAERRKSAE | 232 |
| BAC48147.1 | HPFVESLVRSLLETIM-MTRGLP--FEQIWMQKRRKTLAEDVAFMNMVDEIIAERRKSAE | 232 |
| BAL12135.1 | HPFVESLVRSLLETIM-MTRGLP--FEQLWMQKRRKTLAEDVAFMNMVDEIIAERRKSAE | 232 |

|            |                                                                |     |
|------------|----------------------------------------------------------------|-----|
| CCE00185.1 | HPFVEGLVRSLETIM-MTRGLP--LEHLWMGRRRTVLAEDVAFMNKMOVDEIVAERRKSAE  | 232 |
| EIG57609.1 | HPFVESLVRSLLETIM-MTRGLP--FEQLWMQKRRKTMAEDVDFMNKMOVDEIIAERRKGGE | 232 |
| EHR02046.1 | HPFVESLVRSLLETIM-MTRGLP--FEQLWMQKRRKTMAEDVDFMNKMOVDEIIAERRKGGD | 232 |
| EJN11211.1 | HPFVESLVRSLLETIM-MTRGLP--FEQVVMQKRRKTMGEDVAFMNKMOVDEIIAERRKNAD | 232 |
| CCF15606.1 | HPFITSMVRALDEAMSQQLORLE--IKDKLMVITKRQFKHDIQAMFTLVDKIIAERKEHED  | 172 |
| CCF12687.1 | SPFINSMVRLQEAMHQSGRLK--IQNTLMVGTTRQFTQDIETMFSLVDKIIERKANGD     | 230 |
| ABB05850.1 | HPFVDAMVNTLSEAGKRELRPK--LVSKLMVKRSRQFDADIEVMRSLATKMIEDRRKNPH   | 230 |
| EHP43606.1 | HPFINAMVGALEEAMGKLTRFA--LQDKFMHKAHRKFADDIQYMRELVDVVRQRRAAAG    | 254 |
| ABF10339.1 | DPFVMAMVGALEAMQKLTRLP--IQDRFMGRAHRQAAEDIAYMRNLVDDVIRQRRVSPT    | 236 |
| CAJ95800.1 | HPFIEAMVGALEEAMSKLTRFA--LQDRFMHAAHQKFDDQDTRFMRDLVDDVIRRRRAGDA  | 256 |
| AEI79937.1 | HPFIEAMVGALEEAMSKLTRFA--LQDRFMHAAHQKFDDQDTRFMRDLVDDVIRRRRAGNA  | 256 |
| AFD27790.1 | HPFVDAMVGALEAVAGKGGI-----SSNPLHLNRNRQYRHDLAAREIADDLIRQRQADPQ   | 229 |
| ABC62112.1 | HPFIEALNRTLDTTQ-KMRGLP--GEKLLKRQOIEQLNEDAAYMNNLVDEIIRERRQTGE   | 232 |
| EAQ27850.1 | HPFIRALTRTLETTQ-KIRGIP--GEKLLKGDVAVKQLHRDAKYMNNLVDEIIRERQRSGG  | 232 |
| EIT84377.1 | HPFIESMGRGLDEAMQMQRLP--FQERFMFATRRQFQORDITTMFSLVDDIIAERKKHGT   | 230 |
| CCG43686.1 | HPFVEKMOVHALDESMSQTORFE--LQDKLMIRTKKQYKEDIEYMFNLVDQLIAERKETGD  | 230 |
| ABX05160.1 | HPFVEAMVRALAEAGARARRLS--IQTKLMRSTQRQYEAADMQYMHGITDELIAKRRSLPS  | 233 |
| BAJ96920.1 | HPFVNSMVRLHEAGSRARRTS--IQNKLMIASQRQFNADIQNMQETAGKIIERRRKGGQ    | 228 |
| GAB96874.1 | HPFVGAMVDALEESGQRGRRLP--IQNRLMLATQRRYDEDIRLMHEVADQVIAHRKAHPL   | 269 |
| EFH80345.1 | HPFIQSMGNALGESMARGRRLA--LQEKLMVKNHRQFQADVDFMNNLVQVIRERKAGGE    | 234 |
| EFH88481.1 | HPFVEAMVHILSTTAARATRPP--IEEKLRFRRRQLQADLDLLLSTADQLVREKMMGT     | 226 |
| EAW32450.1 | HPFIESMLVALQEAIDRAVALP--FVHAMNIGRRORYEKHVQNLKNIVDSVIAERKADDG   | 228 |
| EIZ82104.1 | HPFVAAMVGALEEAGARARRPE--VATNLLLRTKRRYEADIALMHQVADTLIAERRRDPE   | 230 |
| AEV70722.1 | SPVPASFTAALGEL-----GADSPTPRFNAEFGYLQAYFDDLIAAHTTGDP            | 224 |
| EFC41452.1 | HPFVQSMFEALQEASSRTKRPS--ILNNVLVKTKKKHQRNIEYMHAVADEIVKDRKKNPS   | 259 |
| ACV78954.1 | TPFLQALDRALTLAEGAGKKD--LYAVMHPRATRDLRESAEVLI SFVDDFVKRRRSMPD   | 228 |
| ACV78964.1 | HPFVQAMVRVLTEAQRRAQPK--IAQRLRIKANRQTOEDQEFMKNLVQGLVEDRRRQGD    | 234 |
| ACV81379.1 | HPFVAAMVRNLLAQKEAKELP--LQRKLRVQARRQAREDFQINLVKGLIEDRRRQGD      | 233 |
| EIZ78677.1 | HPFVAAMASALAEAGMRAQRPD--IANTLRLSARRRYETDLALIKQVAETIIERRAQGQ    | 228 |
| EJW15291.1 | HPFVTSMVRALEESLNQAQRLG--IQDMLMVKTRRQFQDDIDVMFSLVDKIIAERKAHDH   | 229 |
| EJW16173.1 | HPFITSMVRALSEAMHQLORLN--IQDKLMVVTKRQFHHDIQFMYSLVDKIIAERKQOPE   | 232 |
| EHQ58913.1 | HPFVASMVRALSETMSQAQRLG--IQDMLMVKSRRQLQEDLEFMFSLVDKIIAERKAHGQ   | 229 |
| EHQ59900.1 | HPFIIISMVRALNEAMNQLORLG--LQDKMMILTKRQYKHDIQTMFSLVDKIIAERKAHGG  | 230 |
| EHB66924.1 | HPFIDSMVRALDEGMNQLHRLG--IQDMFMLKKKRQFQDDIQFMFSLVDELIRERQKHGG   | 230 |
| AFH60445.1 | HPFITSMVRALDEAMSQQLORLG--LQDKLMVISKRQYKHDIQTMFGLVDKIIAERKEHGS  | 230 |
| AEI42011.1 | HPFITSMVRALDEAMSQQLORLG--LQDKLMVISKRQYKHDIQTMFGLVDKIIAERKEHGP  | 230 |
| ADO57681.1 | HPFVTSMTRALDEAMGQLORLN--LQNKLMLSKKKQFKHDIETMFSLVDSIIQERKTVGN   | 230 |
| EGG32133.1 | HPFIDSMVRALDEGMNQLHRLG--IQDMFMIKKKRQFQEDIQFMFSLVDELIIQDRRKHGG  | 231 |

|            |                                                                   |     |
|------------|-------------------------------------------------------------------|-----|
| EGL17662.1 | HPFITSMVRALHEAMNQTQRLG--LQDKLMVITKRQFNHDIQAMFALVDKLI AERRAOGT     | 231 |
| ACX65034.1 | HPFIDSMVRALDEGMNQLHRLG--IQDMFMIKKKRQFQEDIQFMFSLVDELIQDRRKHGG      | 231 |
| ACT11327.1 | LPFVKAIIVGSLKEAGLRVRRPG--IVNKLMI PSTRQYRTDKALMYSVVEQLIAARKMDPK    | 230 |
| AEA28016.1 | HPFVDAMMRTL TETQKRARLLP--PLIRLRRKAQRQLMADNKYMEREVQNILDERRRAGN     | 236 |
| EFP68091.1 | HPFLAAMVGVLSEAMGKLTRLP--LKDRFMREHHRRF EHDVAAMHQLVDEVIRARRQAKD     | 243 |
| EGY61507.1 | HPFLAAMVGVLSEAMGKLTRLP--LKDRFMREHHRRF EHDVAAMHQLVDEVIRARRQAKD     | 243 |
| EIE85788.1 | NPFIEAMGYCLSLALKRMQQAQ--FVKQLPIEANRRFDRSVRLMHEIVENVIRERKESPD      | 314 |
| EIE92534.1 | NAFIEAMGYCLKQAVQRIQQA--FVKQLPIEANRRFDRSVRLMHEVVENVIRERKASPD       | 314 |
| BAE46296.1 | HPFVGAMSRVLAHVNSTSNDIP-FLRKLKRGNGADLQNEKDIALLRVVDNVIAERQSKPG      | 285 |
| BAH31604.1 | HPFVKAMVGALSHSQR TTF LKSTALGRVLARRADQRDEVRKAYMAE VVDEVIRARRTSTE   | 241 |
| EEN84644.1 | HPFVKAMVGALSHSQR TTF LKSTALGRVLARRADQRDEVRKAYMAE VVDEVIRARRTSTE   | 241 |
| EEN88978.1 | HPFVGAMSRVLEHVNR TSN DIP-FLRKLKRGNGAELQY EKDI AFVVRTVDDVITERQAKQG | 325 |
| ABG96413.1 | HPFVQAMVGALSHSQR TTFVKSSALGRLLMRRSDRRN IANLEHMAE VVDEVIRARRDSAE   | 273 |
| BAH52971.1 | HPFVQAMVGALSHSQR TTFVKSTALGRLLARRSDRRN VANLEHMAE VVDEVIRARRDSAE   | 240 |
| EHI44575.1 | HPFVQAMVGALSHSQR TTFVKSTALGRLLARRSDRRN VANLEHMAE VVDEVIRARRDSAE   | 275 |
| EID73168.1 | HPFVQAMVGALSHSQR TTFVKSSALGRLLMRRSDRRN VANLEHMAE VVDEVIRARRDSAE   | 240 |
| EHK83749.1 | DPFIAAMSRALEYINRSSNDIP-ILRALFGRAAREQHERDIALMQQTVDRIVEER-MRSG      | 216 |
| EJI96173.1 | HPFVQAMVGALSHSQR TTFVKSSALGRLLMRRSDRRN IANLEHMAE VVDEVIRARRDSAE   | 240 |
| ABI79384.1 | HPFVEAMSRAMSYSVQTANDVP-VLREILGWKAMRQNP KDIALMKATVDEVIAARRSGAT     | 267 |
| CAR47816.1 | HPFVESMSRAMAYSVQTANDVP-VLREILGWKAMRQNP KDIALMKTTVDQVIAARRSGET     | 269 |
| AEK26937.1 | DPFIAAMSRALEYINRSSNDIP-ILRALFGRSAREQHERDIALMQETVDRIVEER-MRSG      | 248 |
| ABE39056.1 | HPFVESLVR SLETIM-MTRGLP--LENLWMKKRR ETLADDVVF MNAMVDEIIAERRKASE   | 232 |
| ABD08340.1 | HPFVESLVR SLETIM-MTRGLP--LENLWMKKRR DTLAEDVAF MNAMVDEIIAERRKAA-   | 231 |
| CAM03474.1 | HPFVGAMVRCLDWSMTRLSRV----PGTDH SERDEAFRADARYLASVVDEVINTRAAEGD     | 227 |
| EJF54063.1 | HPFVEAMLFILHEANQHMRRLP--IMNRLMYKTKERYNKDIQYMYTVAQKILDQRRKADK      | 244 |
| AFC23737.1 | HPFVEAMLFILHEANQHMRRLP--IMNRLMYKTKERYNKDIQYMYTVAQKILDQRRKADK      | 232 |
| ADG98903.1 | SPLIAAIVRELTYAQRRTDVLP-WFERMFLRKREHQHQADMTLAKRTVDDIVGERRRNPH      | 241 |
| EGI54680.1 | HPFVAAMVGALEESGRRSRLPP--GAGKLM L LRNR RF EADIKILRDVSNRLIEERHG DPR | 227 |
| AEW97204.1 | HPFVAAMVRG L LHSQALLSRKA--DDGVDHSADEAFRADNAYLAQVVDEVIEARRASGE     | 246 |
| CAJ88567.1 | HPFVTAMVGTLT TYAQR LNTVPA-PLAPWLLRGASRRNTADIDHLNRTVDDLVRARRAAGG   | 256 |
| BAC68285.1 | HPFLNALLQALVESLRSQELP--VMTKMRKADDKKYRENIRLMRDLVENVIKERREGKG       | 236 |
| BAC75137.1 | HPFVTAMVGTLT TYAQR RNVP E-PLAPLLLRTATR RNAADLAYLNRTVDALVRARRTT--  | 250 |
| EDY51256.1 | HPFITAMVSALDHAQRKDTFIP--GLDFLRRGAEARQRIN IETMNR LADDIVRRRRRAASD   | 216 |
| EFG07822.1 | HPFITAMVSALDHAQRKDTFIP--GLDFLRRGAEARQRIN IETMNR LADDIVRRRRRAASD   | 248 |
| EHN78335.1 | HPFVTAMVGTLTGYAQR RNTPA-PLAPWLLRDASRRRNAAD IAYLNRTVDDLVRERRSTGG   | 256 |
| CAB66201.1 | HPFVTAMVGTLTGYAQR LNTVPA-PLAPWLLRDASRRRNAAD IAH LNRTVDDLVRERRANGG | 256 |
| EGG48117.1 | HPFVTAMIGTLTHAQR RN AVPG-PLAPLLLRAAARRNEDDIALLNRTVDAVVAARREADG    | 263 |
| EFL20831.1 | HPFVTSLSRALGFAQSKGESIP--GTEVFKWRQAEQFRGDV TLMQDLVDDVIRQRRASGD     | 241 |

|            |                           |                                       |     |
|------------|---------------------------|---------------------------------------|-----|
| EFL28515.1 | HPFVSAMVRCLEWSMRKVARR---- | PDVDYSEQDEAFRADTAYLTSVVDEVIQARVAAGE   | 235 |
| AEY93311.1 | HPFVTAMVGTLAYAQRLNSVPG-   | PLAPLLLRTAARRNAADIAHLNRTVDGLVAARRRSG- | 254 |
| AEY93321.1 | HPFVESMVRCLEWSMTRLART---- | PGTDHSAADAAFRKDADHLARVDDVIAARTGTDQ    | 233 |
| EFD71156.1 | HPFVTAMVGTGTYAQRLNTVPA-   | PLAPWLLRDASRRNAADIAHLNRTVDDLVRERRANGG | 256 |
| CBG67789.1 | HPFVTALSRALGFAQAKGESIP--  | GLDLFKWKQAEQFRTDVAVMRDLVDDVIRERRASGD  | 236 |
| CBG68112.1 | HPFVAAMVGTLTYYAQQRNVVPD-  | PLVPVLLRGAAQQNRADMAFLVETVDAVVRARRSPGG | 252 |
| EFL10082.1 | HPFVTAMIRALRFAQLENVK--    | VPFVRYALAGSAAQNRADIATMTDLVDEVIETRREG- | 267 |
| EFF88741.1 | HPFVEAALRSLGHAQDVLEAIP--  | GTEVFRRKQAEQFKRDNQAMRDLVDKIIQERRASGD  | 235 |
| EDY58112.1 | HPFVTAMVGTLTYYAQRLNSVPF-  | PA---LVRRAAQRNADDIAYLNRMVDDLVRARRGA-- | 247 |
| EFL36674.1 | HPFVTAMIGTTLTYAQRLNTVPF-  | PLAPLLLRSATTRNAQDIAHLNRTVDELVRARRTDG- | 264 |
| EFL36680.1 | HPFVESMVRCLEWSMTRLARV---- | PGKDYSADAAAFREDSAYLAQVVDEVIAARTGTDQ   | 283 |
| EFE65335.1 | HPFVTAMVGTLTYYAQRLNNVPA-  | PLAPLLLRRANRRNTADIDRLNRIVDEVVRARRAHG- | 252 |
| EGX54696.1 | HPFVTAMVGTLSHAQRLNTVPA-   | AF---LPRRAARRNQADIDHLDRTVDELIRARTAGG- | 249 |
| ACZ89135.1 | HPFIDAMVRALSEAGGRSRRVP--  | LQNKLMFVSRROYEADAALMHDVCDELIARRRQADP  | 233 |
| ABD83817.1 | HPFVESLVRSLLETIM-MIRGLP-- | LENFWMRRRRSDLATDVAFMNKMVDEIVAERRKSAE  | 232 |
| ADU39615.1 | HPFVDAMVRTLETVQ-NRRGLP--  | LEELMLKKELAQQRKDIRYMHKMVEDIIEERRASGA  | 231 |
| EJL72014.1 | HPFVDAMVRTLETVQ-NRRGLP--  | LEELMLKKELAQQRKDIRFMHKMVEDIIEERRASGA  | 231 |

sp|P14779.2|CPXB\_PRIM2 -----Q-SDDLTHMLNGKDPETGEPLDDENIRYQIITFLIAGHETTSGLLSFAL 278  
ADF40088.1 -----Q-SDDLTHMLNGKDPETGEPLDDENIRYQIITFLIAGHETTSGLLSFAL 278  
ADE70259.1 -----Q-SDDLTHMLNGKDPETGEPLDDENIRYQIITFLIAGHETTSGLLSFAL 278  
AEN88827.1 -----Q-SDDLTHMLNGKDPETGEPLDDENIRYQIITFLIAGHETTSGLLSFAL 278  
KFN05180.1 -----Q-SDDLTHMLNGKDPETGEPLDDENIRYQIITFLIAGHETTSGLLSFAL 278  
ACZ37122.1 -----Q-SDDLTHMLNGKDPETGEPLDDENIRYQIITFLIAGHETTSGLLSFAL 278  
ADA57055.1 -----Q-SDDLTHMLNGKDPETGEPLDDENIRYQIITFLIAGHETTSGLLSFAL 278  
ADA57058.1 -----Q-SDDLTHMLNGKDPETGEPLDDENIRYQIITFLIAGHETTSGLLSFAL 278  
ADA57059.1 -----Q-SDDLTHMLNGKDPETGEPLDDENIRYQIITFLIAGHETTSGLLSFAL 278  
ADA57061.1 -----Q-SDDLTHMLNGKDPETGEPLDDENIRYQIITFLIAGHETTSGLLSFAL 278  
ADA57062.1 -----Q-SDDLTHMLNGKDPETGEPLDDENIRYQIITFLIAGHETTSGLLSFAL 278  
ADA57068.1 -----Q-SDDLTHMLNGKDPETGEPLDDENIRYQIITFLIAGHETTSGLLSFAL 278  
AAT62301.1 -----QEENDLLSRMLNVQDPETGEKLDDENIRFQIITFLIAGHETTSGLLSFAI 281  
AAM54108.1 G-----E-RPDDLRLMLTCADPVTGERLSARNVRYQLATFLIAGHETTSGLLSFAV 285  
EFQ83738.1 -----ASDHDLGIMLQTPHPETGERLDDLNIRFQILTFLVAGHETTSGLLSFAL 283  
EFL88452.1 -----DTSQKDLLNYMLAGVVKVTGESLSDENIRYQINTFLIAGHETTSGLMSFTL 281  
BAF89518.1 G-----APVPTDLLQVMLTTPDRVGTGQKLPDDNIRGQLIVLLIAGHETTSGLMLAYAL 373  
CBI43648.1 -----ENLSDLLALMLEAKDPVTGERLDDENIRYQIITFLIAGHETTSGLLSFAI 280  
AEB22839.1 -----RDEKDLLARMLNVEDPETGEKLDDENIRFQIITFLIAGHETTSGLLSFAI 280  
EDT22025.1 -----QEENDLLSRMLNVQDPETGEKLDDENIRFQIITFLIAGHETTSGLLSFAI 281  
AFH84458.1 -----QEENDLLSRMLNVQDPETGEKLDDENIRFQIITFLIAGHETTSGLLSFAI 289  
ADP31197.1 -----QDEKDLLARMLNVEDPETGEKLDDENIRFQIITFLIAGHETTSGLLSFAI 280  
ACP19384.1 -----QEENDLLSRMLNVKDPETGEKLDDENIRFQIITFLIAGHETTSGLLSFAI 281  
ADL27534.1 -----QEENDLLSRMLNVSDPETGEKLDDENIRFQIITFLIAGHETTSGLLSFAI 281  
ACO29732.1 -----QEENDLLSRMLNVQDPETGEKLDDENIRFQIITFLIAGHETTSGLLSFAI 281  
EDX65100.1 -----QEENDLLSRMLNVQDPETGEKLDDENIRFQIITFLIAGHETTSGLLSFAI 281  
EEK61456.1 -----QEENDLLSRMLNVSDPETGEKLDDENIRFQIITFLIAGHETTSGLLSFAI 281  
EEL16232.1 -----QEENDLLSRMLNVQDPETGEKLDDENIRFQIITFLIAGHETTSGLLSFAI 289  
EDZ53094.1 -----QEENDLLSRMLNVSDPETGEKLDDENIRFQIITFLIAGHETTSGLLSFAI 281  
EEL81346.1 -----QEENDLLSRMLNVQDPETGEKLDDENIRFQIITFLIAGHETTSGLLSFAI 295  
EEL87105.1 -----QEENDLLSRMLNVQDPETGEKLDDENIRFQIITFLIAGHETTSGLLSFAI 295  
EEL75761.1 -----QEENDLLSRMLNVKDPETGEKLDDENIRFQIITFLIAGHETTSGLLSFAI 222  
ACK88541.1 -----QEENDLLSRMLNVQDPETGEKLDDENIRFQIITFLIAGHETTSGLLSFAI 281  
EJQ05303.1 -----QEENDLLSRMLHVQDPETGEKLDDENIRFQIITFLIAGHETTSGLLSFAI 281  
EEK50040.1 -----QEENDLLSRMLNVPDPETGEKLDDENIRFQIITFLIAGHETTSGLLSFAI 281  
AAS42149.1 -----QEENDLLSRMLHVQDPETGEKLDDENIRFQIITFLIAGHETTSGLLSFAI 281  
AAP10153.1 -----QEENDLLSRMLNVPDPETGEKLDDENIRFQIITFLIAGHETTSGLLSFAI 281  
EEK83466.1 -----QEENDLLSRMLNVKDSETGENLDDENIRFQIITFLIAGHETTSGLLSFAI 289

ACK63698.1 -----QEENDLLSRMLNVKDPETGEKLDDENIRFQIITFLIAGHETTSGLLSFAI 222  
EJS57156.1 -----QEENDLLSRMLNVQDPETGEKLDDENIRFQIITFLIAGHETTSGLLSFAI 281  
EJS56605.1 -----QEENDLLSRMLNVQDPETGEKLDDENIRFQIITFLIAGHETTSGLLSFAI 281  
EJS68951.1 -----QEGNDLLSRMLNVKDPETGETLDDENIRFQIITFLIAGHETTSGLLSFAI 280  
EJQ10567.1 -----QEENDLLSRMLNVSDPETGEKLDDENIRFQIITFLIAGHETTSGLLSFAI 281  
EJQ13433.1 -----QEENDLLSRMLNVQDPETGEKLDDENIRFQIITFLIAGHETTSGLLSFAI 281  
EJQ20399.1 -----QEENDLLSRMLNVQDPETGEKLDDENIRFQIITFLIAGHETTSGLLSFAI 281  
EJQ30236.1 -----QEENDLLSRMLNVSDPETGEKLDDENIRFQIITFLIAGHETTSGLLSFAI 281  
EJQ51278.1 -----QEGNDLLSRMLNVKDPETGETLDDENIRFQIITFLIAGHETTSGLLSFAI 280  
EEL10858.1 -----QEENDLLSRMLNVPDPETGEKLDDENIRFQIITFLIAGHETTSGLLSFAI 281  
EEL05393.1 -----QEENDLLSRMLNVQDPETGEKLDDENIRFQIITFLIAGHETTSGLLSFAI 295  
EEK94080.1 -----QEENDLLSRMLNVKDPETGEKLDDENIRFQIITFLIAGHETTSGLLSFAI 284  
EEK99882.1 -----QEENDLLSRMLHVQDPETGEKLDDENIRFQIITFLIAGHETTSGLLSFAI 284  
EEK55784.1 -----QEENDLLSRMLNVQDPETGEKLDDENIRFQIITFLIAGHETTSGLLSFAI 289  
ADK05784.1 -----QEENDLLSRMLNVKDPETGEKLDDENIRFQIITFLIAGHETTSGLLSFAI 281  
AAU17340.1 -----QEENDLLSRMLNVQDPETGEKLDDENIRFQIITFLIAGHETTSGLLSFTI 281  
EEL64394.1 -----QEENDLLSRMLNVSDPETGEKLDDENIRFQIITFLIAGHETTSGLLSFAI 281  
AEW56259.1 -----QEENDLLSRMLNVQDPETGEKLDDENIRFQIITFLIAGHETTSGLLSFAI 281  
AFQ11690.1 -----QEENDLLSRMLHVQDPETGEKLDDENIRFQIITFLIAGHETTSGLLSFAI 281  
EAL16831.1 -----QEENDLLSRMLNVKDPETGEKLDDENIRFQIITFLIAGHETTSGLLSFAI 281  
ACK94296.1 -----QEENDLLSRMLNVQDPETGEKLDDENIRFQIITFLIAGHETTSGLLSFAI 281  
EDZ58760.1 -----QEENDLLSRMLHVQDPETGEKLDDENIRFQIITFLIAGHETTSGLLSFAI 281  
EJV84218.1 -----QEENDLLSRMLNVQDPETGEKLDDENIRFQIITFLIAGHETTSGLLSFSI 281  
EJQ69212.1 -----QEENDLLSRMLNVQDPETGEKLDDENIRFQIITFLIAGHETTSGLLSFAI 281  
EJQ80339.1 -----QEENDLLSRMLNVQDPETGEKLDDENIRFQIITFLIAGHETTSGLLSFAI 281  
EJV81602.1 -----QEENDLLSRMLNVQDPETGEKLDDENIRFQIITFLIAGHETTSGLLSFAI 281  
EJQ95474.1 -----QEENDLLSRMLNVKDPETGEKLDDENIRFQIITFLIAGHETTSGLLSFAI 281  
EEK44229.1 -----QEENDLLSRMLHVQDPETGEKLDDENIRFQIITFLIAGHETTSGLLSFAI 289  
EEK88560.1 -----QEENDLLSRMLNVSDPETGEKLDDENIRFQIITFLIAGHETTSGLLSFAI 281  
EJR07451.1 -----QEENDLLSRMLNVQDPETGEKLDDENIRFQIITFLIAGHETTSGLLSFAI 281  
EJR16542.1 -----QEENDLLSRMLNVQDPETGEKLDDENIRFQIITFLIAGHETTSGLLSFAI 281  
BAL18840.1 -----QEENDLLSRMLHVQDPETGEKLDDENIRFQIITFLIAGHETTSGLLSFAI 281  
EDX69960.1 -----QEENDLLSRMLNVQDPETGEKLDDENIRFQIITFLIAGHETTSGLLSFAI 281  
ACM13462.1 -----QEENDLLSRMLHVQDPETGEKLDDENIRFQIITFLIAGHETTSGLLSFAI 281  
EEK75631.1 -----QEENDLLSRMLNVQDPETGEKLDDENIRFQIITFLIAGHETTSGLLSFAI 281  
EEL25491.1 -----QEENDLLSRMLNVPDPETGEKLDDENIRFQIITFLIAGHETTSGLLSFAI 222  
EEL21990.1 -----QEENDLLARMLNVQDPETGEKLDDENIRFQIITFLIAGHETTSGLLSFAI 289  
EEL33825.1 -----QEENDLLARMLNVQDPETGEKLDDENIRFQIITFLIAGHETTSGLLSFAI 289

|                        |                                                         |     |
|------------------------|---------------------------------------------------------|-----|
| EEL44933.1             | -----QEENDLLSRMLNVQDPETGEKLDDENIRFQIITFLIAGHETTSGLLSFAI | 289 |
| EEL50167.1             | -----QEENDLLSRMLNVKDPETGEKLDDENIRFQIITFLIAGHETTSGLLSFAI | 359 |
| EJR22930.1             | -----QEENDLLSRMLNVQDPETGEKLDDENIRFQIITFLIAGHETTSGLLSFAI | 281 |
| EJP91231.1             | -----QEENDLLSRMLNVQDPETGEKLDDENIRFQIITFLIAGHETTSGLLSFAI | 281 |
| EJR37623.1             | -----QEENDLLSRMLNVPDPETGEKLDDENIRFQIITFLIAGHETTSGLLSFAI | 281 |
| EJR50635.1             | -----QEENDLLSRMLNVKDPETGEKLDDENIRFQIITFLIAGHETTSGLLSFAI | 281 |
| EJR64551.1             | -----QEENDLLSRMLNVQDPETGEKLDDENIRFQIITFLIAGHETTSGLLSFAI | 281 |
| EJR75620.1             | -----QEENDLLSRMLNVKDPETGEKLDDENIRFQIITFLIAGHETTSGLLSFAI | 281 |
| EJR82049.1             | -----QEENDLLSRMLNVPDPETGEKLDDENIRFQIITFLIAGHETTSGLLSFSI | 281 |
| EJR83659.1             | -----QEENDLLSRMLNVPDPETGEKLDDENIRFQIITFLIAGHETTSGLLSFAI | 281 |
| EJR91135.1             | -----QGENDLLARMLSAKDPDTGEQLDDANIRYQIITFLIAGHETTSGLLSFAI | 279 |
| EJR97241.1             | -----QEENDLLSRMLNVPDPETGEKLDDENIRFQIITFLIAGHETTSGLLSFAI | 281 |
| EJS05852.1             | -----QEENDLLSRMLNVQDPETGEKLDDENIRFQIITFLIAGHETTSGLLSFAI | 281 |
| EDX58768.1             | -----QEENDLLSRMLNVQDPETGEKLDDENIRFQIITFLIAGHETTSGLLSFAI | 281 |
| AAU24352.1             | -----ESGNDLLSMLHAKDPETGEKLDDENIRYQIITFLIAGHETTSGLLSFAI  | 280 |
| ABY44122.1             | -----QEENDLLSRMLNVQDPETGEKLDDENIRFQIITFLIAGHETTSGLLSFAI | 281 |
| EDW23201.1             | -----KTGDDLLSMLHAKDPETGERLSDENIRYQIITFLIAGHETTSGLLSFAI  | 279 |
| ABV62358.1             | -----KTGNDLLSMLHAKDPETGERLSDENIRYQIITFLIAGHETTSGLLSFAI  | 279 |
| EIF12263.1             | -----RDEKDLLARMLNVEDPETGEKLDDENIRFQIITFLIAGHETTSGLLSFAI | 279 |
| EIF14027.1             | -----ENLSDLLALMLEAKDPVTGERLDDENIRYQIITFLIAGHETTSGLLSFAI | 280 |
| EHL75405.1             | -----QEENDLLSRMLNVSDPETGEKLDDENIRFQIITFLIAGHETTSGLLSFAI | 281 |
| EJD67577.1             | -----RDEKDLLARMLNVEDPETGEKLDDENIRFQIITFLIAGHETTSGLLSFAI | 279 |
| EJD68347.1             | -----ENLSDLLALMLEAKDPVTGERLDDENIRYQIITFLIAGHETTSGLLSFAI | 280 |
| EFV73436.1             | -----ESGNDLLSMLHAKDPETGEKLDDENIRYQIITFLIAGHETTSGLLSFAI  | 294 |
| CBY93692.1             | -----QEENDLLSRMLHVQDPETGEKLDDENIRFQIITFLIAGHETTSGLLSFAI | 281 |
| AFI27355.1             | -----QDEKDLLARMLNVEDPETGEKLDDENIRFQIITFLIAGHETTSGLLSFAI | 280 |
| AFI29229.1             | -----ENIKDLLSMLLYAKDPVTGETLDDENIRYQIITFLIAGHETTSGLLSFAI | 280 |
| EIL85422.1             | -----KMGDDLLSMLHATDPETGERLSDENIRYQIITFLIAGHETTSGLLSFAI  | 279 |
| ADV93500.1             | -----DNIKDLLSMLLYAKDPVTGETLDDENIRYQIITFLIAGHETTSGLLSFAI | 280 |
| ADV95715.1             | -----QDEKDLLARMLNVEDPETGEKLDDENIRFQIITFLIAGHETTSGLLSFAT | 280 |
| BAI84248.1             | -----QDEKDLLARMLNVEDPETGEKLDDENIRFQIITFLIAGHETTSGLLSFAT | 280 |
| EFG90288.1             | -----ENIKDLLSMLLYAKDPVTGETLDDENIRYQIITFLIAGHETTSGLLSFAI | 280 |
| EFG91781.1             | -----QDEKDLLARMLNVEDPETGEKLDDENIRFQIITFLIAGHETTSGLLSFAI | 280 |
| AEP85668.1             | -----QDEKDLLARMLNVEDPETGEKLDDENIRFQIITFLIAGHETTSGLLSFAI | 280 |
| AEP87558.1             | -----ENIKDLLSMLLYAKDPVTGETLDDENIRYQIITFLIAGHETTSGLLSFAI | 280 |
| sp 008336.1 CYPB_BACSU | -----ENIKDLLSMLLYAKDPVTGETLDDENIRYQIITFLIAGHETTSGLLSFAI | 280 |
| sp 008394.1 CYPD_BACSU | -----QDEKDLLARMLNVEDPETGEKLDDENIRFQIITFLIAGHETTSGLLSFAT | 280 |
| AEP89812.1             | -----QDEKDLLARMLNVEDPETGEKLDDENIRFQIITFLIAGHETTSGLLSFAT | 280 |

|            |                                                            |     |
|------------|------------------------------------------------------------|-----|
| AEP91702.1 | -----DNIKDLLSLMLYAKDPVTGETLDDENIRYQIITFLIAGHETTSGLLSFAI    | 280 |
| EHA31094.1 | -----DNIKDLLSLMLYAKDPVTGETLDDENIRYQIITFLIAGHETTSGLLSFAI    | 282 |
| ADH07708.1 | -----QEENDLLSRMLNVKDPETGEKLDDENIRFQIITFLIAGHETTSGLLSFAI    | 281 |
| EEM28177.1 | -----QEENDLLSRMLNVDPETGEKLDDENIRFQIITFLIAGHETTSGLLSFAI     | 281 |
| AFQ14162.1 | -----QEENDLLSRMLNVQDPETGEKLDDENIRFQIITFLIAGHETTSGLLSFAI    | 281 |
| EEM95517.1 | -----QEENDLLSRMLNVQDPETGEKLDDENIRFQIITFLIAGHETTSGLLSFAI    | 281 |
| EEN02344.1 | -----QEENDLLSRMLNVQDPETGEKLDDENIRFQIITFLIAGHETTSGLLSFAI    | 281 |
| AFU13781.1 | -----QEENDLLARMLNVQDPETGEKLDDENIRFQIITFLIAGHETTSGLLSFAI    | 289 |
| EEM70897.1 | -----QEENDLLSRMLNVQDPETGEKLDDENIRFQIITFLIAGHETTSGLLSFAI    | 289 |
| ADY22413.1 | -----QEENDLLSRMLHVQDPETGEKLDDENIRFQIITFLIAGHETTSGLLSFAI    | 281 |
| EEM82895.1 | -----QEENDLLSRMLNVDPETGEKLDDENIRFQIITFLIAGHETTSGLLSFAI     | 281 |
| EEM52818.1 | -----QEENDLLSRMLNVQDPETGEKLDDENIRFQIITFLIAGHETTSGLLSFAI    | 281 |
| EEM59126.1 | -----QEENDLLSRMLNVQDPETGEKLDDENIRFQIITFLIAGHETTSGLLSFAI    | 289 |
| EEM47193.1 | -----QEENDLLSRMLNVKDPETGEKLDDENIRFQIITFLIAGHETTSGLLSFAI    | 222 |
| EEM76899.1 | -----QEENDLLSRMLNVQDPETGEKLDDENIRFQIITFLIAGHETTSGLLSFAI    | 289 |
| EEM88909.1 | -----QEENDLLSRMLNVKDPETGEKLDDENIRFQIITFLIAGHETTSGLLSFAI    | 289 |
| EEM38196.1 | -----QEENDLLSRMLNVQDPETGEKLDDENIRFQIITFLIAGHETTSGLLSFAI    | 281 |
| EEM21858.1 | -----QEENDLLSRMLNVKDPETGEKLDDENIRFQIITFLIAGHETTSGLLSFAI    | 284 |
| ABK86139.1 | -----QEENDLLSRMLNVQDPETGEKLDDENIRFQIITFLIAGHETTSGLLSFAI    | 289 |
| EJQ37805.1 | -----QEENDLLARMLNVQDPETGEKLDDENIRFQIITFLIAGHETTSGLLSFAI    | 281 |
| CCF04242.1 | -----RDEKDLLARMLNVEDPETGEKLDDENIRFQIITFLIAGHETTSGLLSFAI    | 279 |
| CCF05972.1 | -----ENLSDLLALMLEAKDPVTGERLDDENIRYQIITFLIAGHETTSGLLSFAI    | 280 |
| ABS73124.1 | -----RDEKDLLARMLNVEDPETGEKLDDENIRFQIITFLIAGHETTSGLLSFAI    | 279 |
| ABS74786.1 | -----ENLSDLLALMLEAKDPVTGERLDDENIRYQIITFLIAGHETTSGLLSFAI    | 280 |
| EKE46398.1 | -----RDEKDLLARMLNVEDPETGEKLDDENIRFQIITFLIAGHETTSGLLSFAI    | 279 |
| EKE48022.1 | -----ENLSDLLALMLEAKDPVTGERLDDENIRYQIITFLIAGHETTSGLLSFAI    | 280 |
| CCG48683.1 | -----RDEKDLLARMLNVEDPETGEKLDDENIRFQIITFLIAGHETTSGLLSFAI    | 279 |
| AFJ60789.1 | -----RDEKDLLARMLNVEDPETGEKLDDENIRFQIITFLIAGHETTSGLLSFAI    | 286 |
| AFJ62808.1 | -----ENLSDLLALMLEAKDPVTGERLDDENIRYQIITFLIAGHETTSGLLSFAI    | 280 |
| EEK66903.1 | -----QEENDLLSRMLNVQDPETGEKLDDENIRFQIITFLIAGHETTSGLLSFAI    | 295 |
| EJQ52935.1 | -----QEENDLLSRMLNVQDPETGEKLDDENIRFQIITFLIAGHETTSGLLSFAI    | 281 |
| EJS69574.1 | -----QEENDLLSRMLNVQDPETGEKLDDENIRFQIITFLIAGHETTSGLLSFAI    | 281 |
| EJV63294.1 | -----QEENDLLSRMLNVQDPETGEKLDDENIRFQIITFLIAGHETTSGLLSFAI    | 281 |
| EKF35778.1 | -----QTGDDLLSMLNAKDPETGERLSDENIRYQIITFLIAGHETTSGLLSFAI     | 279 |
| EGP08506.1 | A-----AAGTKDMLNAMMTGVDKLTGQQLDDVNIIRYQINTFLIAGHETTSGLLSCAI | 284 |
| BAL78328.1 | G-----IDDKKDMAAMMTGVDRATGEQLDDVNIIRYQINTFLIAGHETTSGLLSCTI  | 284 |
| BAC48147.1 | G-----IDDKKDMAAMMTGVDRSTGEQLDDVNIIRYQINTFLIAGHETTSGLLSYTL  | 284 |
| BAL12135.1 | G-----VDDKKDMAAMMTGVDRSTGEQLDDINIIRYQINTFLIAGHETTSGLLSYTL  | 284 |

|            |                                                              |     |
|------------|--------------------------------------------------------------|-----|
| CCE00185.1 | S-----GAASADDDKMLNAMMSGVDRATGEQLDDVNIRYQINTFLIAGHETTSGLLSYTI | 288 |
| EIG57609.1 | A-----TDDKKDMLAAMMTGVDRSTGEQLDDVNIRYQINTFLIAGHETTSGLLSCTL    | 284 |
| EHR02046.1 | A-----TDDKKDMLAAMMTGVDRSTGEQLDDVNIRYQINTFLIAGHETTSGLLSCTL    | 284 |
| EJN11211.1 | A-----IDDKKDMLAAMMTGVDRSTGEQLDDVNIRYQINTFLIAGHETTSGLLSCTI    | 284 |
| CCF15606.1 | -----HDANDLLSHMLKGKDPQTGEGLDDENIRYQIITFLIAGHETTSGLLSFAL      | 222 |
| CCF12687.1 | -----QGEIDLLTRMLNGKDPQTGERLDDKNIRYQIITFLIAGHETTSGLLSFAL      | 280 |
| ABB05850.1 | V-----NEESMDLLDRMLNGIDPVTGEKLDDENIVFQMITFLIAGHETTSGLLSFAT    | 282 |
| EHP43606.1 | K-----DASQPPPHDLLNLMLEARDPDTDQRLDDVNIRNQVITFLIAGHETTSGLLTFAL | 309 |
| ABF10339.1 | -----SGMDLLNLMLEARDPETDRRLDDANIRNQVITFLIAGHETTSGLLTFAL       | 285 |
| CAJ95800.1 | A-----ERPGGTANDLLGLMLEARDPDTDQRLDDENIRNQVITFLIAGHETTSGLLTFAL | 311 |
| AEI79937.1 | A-----QRRGGTANDLLGLMLEARDPDTDQRLDDENIRNQVITFLIAGHETTSGLLTFAL | 311 |
| AFD27790.1 | A-----D-EKDDLLALMLRGRDPETGEGLSLENVRNQMVTFIAGHETTSGLLSFAV     | 280 |
| ABC62112.1 | S-----GQGDLLDFMLSGRDPVTGERLSDENIRYQINTFLIAGHETTSGLLSFTL      | 282 |
| EAQ27850.1 | D-----GPEDLLDFMLSGRDPVTGERLSDENIRYQINTFLIAGHETTSGLLSFTL      | 282 |
| EIT84377.1 | -----SDAKDLLSLMLNGKDPETGQKLLDENIRYQIITFLIAGHETTSGLLAFTL      | 280 |
| CCG43686.1 | -----QGEDDLLAHMLKGKDPETGEALDDENIRFQIITFLIAGHETTSGLLSFAI      | 280 |
| ABX05160.1 | N-----E-VPNDLLGLMLNAKDSITGEGLDDANIRNQLVTFIAGHETTSGLLSFAT     | 284 |
| BAJ96920.1 | G-----EKKDVLDIMLTAKDPVTGEGLSDENIRYQMVTFIAGHETTSGLLSFAT       | 278 |
| GAB96874.1 | P-----D-GQTDILDTMLSAQDPTTGERLSDENVRNQMVTFIAGHETTSGLLSFTL     | 320 |
| EFH80345.1 | -----NAQKKDLLSYMLSGVDKQSGEGLNDVNIRYQIITFLIAGHETTSGLLSFSL     | 285 |
| EFH88481.1 | E-----GQKYNDLLNAMLNGIDKQTGEKLDDVNIRNQIITFLIAGHETTSGLLSFAT    | 278 |
| EAW32450.1 | -----TTDAKDLLSLMLTGSDPATGEKLSDENIRYQIITFLIAGHETTSGLLSFAL     | 279 |
| EIZ82104.1 | A-----A-TRHDLLNLMLEGRDPETGERLSDENIRYQMVTFIAGHETTSGLLSFAL     | 281 |
| AEV70722.1 | -----ADIDDLLYVMVGR-DSDGQPVLDDQNIRNQIMTFLIAGQLTTSELMPNAL      | 273 |
| EFC41452.1 | D-----VNDLLNRMLLGKDPVTNQGLSDENIRYQMVTFIAGHETTSGLLSFTL        | 308 |
| ACV78954.1 | G-----N-APD DLLQHMLTAADPDTGERLSDIEVRQQTLLTLLIAGHETTSGLTALFAL | 279 |
| ACV78964.1 | -----QADNTDLLGRMLTGRDK-NGEGLPDENIIAQCLTFLVAGHETTSGLLSFAI     | 284 |
| ACV81379.1 | -----AADNTDLLGRMLTGVDKSSGEGLPDDNIIAQCMTFLVAGHETTSGLLSFAI     | 284 |
| EIZ78677.1 | V-----G-ARGDLLDIMLSGRDPVTGEGLSDTNIRHQLVTFIAGHETTSGLLSFAL     | 279 |
| EJW15291.1 | -----EGANDLLAYMLKGKDPDTGESLDDANIRYQIITFLVAGHETTSGLLSFAL      | 279 |
| EJW16173.1 | -----EAGQDLLSHMLSGKDPATGESLDDENIRYQIITFLIAGHETTSGLLSFAI      | 282 |
| EHQ58913.1 | -----QEEDDLLAHMLKGQDPETGEALDDTNIRHQIITFLIAGHETTSGLLSFAL      | 279 |
| EHQ59900.1 | -----EDGKDLLAHMLTGKDPETGEPLDDENIRYQIITFLIAGHETTSGLLSFAM      | 280 |
| EHB66924.1 | -----DEG-DLLAHMLEGVDPDTGERLDQENIRYQMITFLIAGHETTSGLLSFAI      | 279 |
| AFH60445.1 | -----KEGEDLLAHMLNGRDPHTGEALDDENIRYQIITFLIAGHETTSGLLTFAL      | 280 |
| AEI42011.1 | -----KDGEDLLAHMLNGRDPHTGEALDDENIRYQIITFLIAGHETTSGLLTFAL      | 280 |
| ADO57681.1 | -----QGEEDLLARMLEKDPETGETLDDENIRYQIITFLIAGHETTSGLLSFAI       | 280 |
| EGG32133.1 | -----EEG-DLLAHMLEGVDPDTGESLDHENIRYQIITFLIAGHETTSGLLSFAI      | 280 |

|            |                                                              |     |
|------------|--------------------------------------------------------------|-----|
| EGL17662.1 | -----EGIDLLSHMLNGKDPETGESLGDENIRYQIITFLIAGHETTSGLLSFAL       | 281 |
| ACX65034.1 | -----EEG-DLLAHMLEGVDPDTGESLDHENIRYQIITFLIAGHETTSGLLSFAI      | 280 |
| ACT11327.1 | A-----S-EKNDLLNRMLNGVDPQTGEKLSDENIAHQMLTFLVAGHETTSGMLSFTV    | 281 |
| AEA28016.1 | -----ADEHQDLLSCMLTGVDKKTGLKLPDENIVGQCLTFLVAGHETTSGLLSFTI     | 287 |
| EFP68091.1 | -----GGAGASDLLGLMLNARDPVSDPELDDTNIRFQVITFLIAGHETTSGLLTFAL    | 295 |
| EGY61507.1 | -----GGAGASDLLGLMLNARDPVSDPELDDTNIRFQVITFLIAGHETTSGLLTFAL    | 295 |
| EIE85788.1 | A-----TNKEKDLLGYMLNARDE-HNLGLSDDNIRDQVVTFLIAGHDTTANTLAWAL    | 365 |
| EIE92534.1 | A-----KNKEKDLLGFMLNACDE-HNLGLSDENIRDQVVTFLIAGHDTTANTLAWTL    | 365 |
| BAE46296.1 | -----EHQDDLLDMLHSADAETGEKLDPVNIRNQVVTFLVAGNETTAGTLAFAL       | 335 |
| BAH31604.1 | -----PGPEDLLELMLRAARENDPNRIDEINIRHQVVTFLVAGHETTSGALSFAI      | 291 |
| EEN84644.1 | -----PGPEDLLELMLRAARENDPNRIDEINIRHQVVTFLVAGHETTSGALSFAI      | 291 |
| EEN88978.1 | -----EHQDDLLDMLNNIIDDETGETLDPVNIRNQVLTFLVAGNETTAGTIAFAL      | 375 |
| ABG96413.1 | -----DGPEDLLELMLRAARENDPHRIDEINIRHQVVTFLVAGHETTSGALSFAI      | 323 |
| BAH52971.1 | -----AGPEDLLELMLRAARENDPNRIDEINIRHQVVTFLVAGHETTSGALSFAI      | 290 |
| EHI44575.1 | -----TGPEDLLELMLRAAREDDPHRIDEINIRHQVVTFLVAGHETTSGALSFAI      | 325 |
| EID73168.1 | -----AGPEDLLELMLRAAREDDPHRIDEINIRHQVVTFLVAGHETTSGALSFAI      | 290 |
| EHK83749.1 | -----EQHGDDLLDMMHTVDPDTGEQLDRESIRNQVLTFLVAGNETTAATLGFVAV     | 266 |
| EJI96173.1 | -----DGPEDLLELMLRAARENDPHRIDEINIRHQVVTFLVAGHETTSGALSFAI      | 290 |
| ABI79384.1 | -----PRQDDLLQRMNDPDPETGEMMSDQSIIRNQVLTFLIAGHETTAGLLSFAL      | 317 |
| CAR47816.1 | -----PRQDDLLQRMLENPDPQTGEMMSNQSIIRNQVLTFLIAGHETTAGLLSFAL     | 319 |
| AEK26937.1 | -----EQHGDDLLDMMHTVDPDTGEQLSPESIRNQVLTFLVAGNETTAATLGFVAV     | 298 |
| ABE39056.1 | S-----AADKKDMLGAMLAGVDRATGEPLDDVNIRYQINTFLIAGHETTSGLLSCAI    | 284 |
| ABD08340.1 | A-----VADKMDMLGAMMTGVDKVTGEPLDDVNIRYQINTFLIAGHETTSGLLSCAI    | 283 |
| CAM03474.1 | -----TSGEDLLGLMLGARHPADGTTLDAANIRNQIITFLIAGHETTSGTLSFAL      | 277 |
| EJF54063.1 | A-----E-QVDDLLGRMLEGVDPDTGEKLSQNI IYQMVTFLIAGHETTSMMMAFTF    | 295 |
| AFC23737.1 | A-----E-QVDDLLGRMLEGVDPDTGEKLSQNI IYQMVTFLIAGHETTSMMMAFTF    | 283 |
| ADG98903.1 | -----ESPTDILDMLLTAVDPETGEQLDDANIRNQILTFLIAGSETSANAVSFAL      | 291 |
| EGI54680.1 | L-----G-ERGDLLDRMLTARDPETGEMLSRDNIQYQMITFLVAGHETTSGLLSFAT    | 278 |
| AEW97204.1 | -----TGTDDLLGLMLGAPHPSDGTPLDAANIRNQVITFLIAGHETTSGALSFAI      | 296 |
| CAJ88567.1 | R-----GGTGDLLDRMLETAHPETGERLSPENVRRQVITFLVAGHETTSGALSFAI     | 307 |
| BAC68285.1 | -----TGEDDLLGLMLEATDPETGKGLDDDNVRDQVVTFLIAGHETTSGLLSFAT      | 286 |
| BAC75137.1 | -----SGEGDLLDRMLDTARPGTGERLAPENIRRQVITFLVAGHETTSGALSFAI      | 300 |
| EDY51256.1 | -----GGADSADDLLGLMLHAEDKDTGQPLDDMNIRYQMLTFLIAGHETTSGALSFAI   | 269 |
| EFG07822.1 | -----GGADSADDLLGLMLHAEDKDTGQPLDDMNIRYQMLTFLIAGHETTSGALSFAI   | 301 |
| EHN78335.1 | DGGR-----GGDGDLLDRMLETAHPRTGERLSPENVRRQVITFLVAGHETTSGALSFAI  | 310 |
| CAB66201.1 | TGGGTGSG--SGSGDLLDRMLETAHPRTGERLSPQNVRRQVITFLVAGHETTSGALSFAI | 314 |
| EGG48117.1 | S-----GSTGDLLDRMLETAHPETGERLAPDNVRRQVITFLVAGHETTSGALSFAI     | 314 |
| EFL20831.1 | -----QSTDDLLGRMLHTRDAGTGEPLDDVNIRHQAITFLIAGHETTSGALSFAI      | 291 |

|            |                                                              |     |
|------------|--------------------------------------------------------------|-----|
| EFL28515.1 | -----SGTDDLGLMLGATHPSDGTPLDHANIRDQVITFLIAGHETTSGALSFAL       | 285 |
| AEY93311.1 | -----GEGDLLDRMLATAHPRTGEKLSPENVRKQVITFLVAGHETTSGALSFAL       | 304 |
| AEY93321.1 | -----SGAEDLLGLMLSAPHPADGTTLDAANIRNQVITFLIAGHETTSGAMSFAL      | 283 |
| EFD71156.1 | TGGGTGSGSGSGRGDLLDRMLETAHPRTGERLSPQNVRRQVITFLVAGHETTSGALSFAL | 316 |
| CBG67789.1 | -----TGTDDLGRMLHTRDQVTGEPLDDVNIRHQAITFLIAGHETTSGALSFAL       | 286 |
| CBG68112.1 | -----GRGAGDGDLLDRMLETAHPETGERLSAENVRRQVITFLVAGHETTSGALSFAL   | 305 |
| EFL10082.1 | -----GEVRDLLGLMLAEGHPETGEQLDPVNIRNQAITFVVAGHETTSGALSFAL      | 317 |
| EFF88741.1 | -----TSTDDLGRMLNTPDPVTGELLDEANMRNQVITFLIAGHETTSGALSFAL       | 285 |
| EDY58112.1 | -----SGDGDLLDRMLETAHPETGERLSPENVRRQVITFLVAGHETTSGALSFAL      | 297 |
| EFL36674.1 | -----GGQGDLLDRMLETAHPVTGERLAPQNVRRQVITFLVAGHETTSGALSFAL      | 314 |
| EFL36680.1 | -----SQADDLLGLMLTAEHPDDGSTLDTANIRNQVITFLIAGHETTSGAMSFAL      | 333 |
| EFE65335.1 | -----GGDGDLLDRMLDTAHPETGERLSPENVRRQVITFLVAGHETTSGALSFAL      | 302 |
| EGX54696.1 | -----PGDGDLLDRMLDTAHPVTGERLSARNVRRQVITFLVAGHETTSGALSFAL      | 299 |
| ACZ89135.1 | G-----E-APRDLGLMLGAADPRTGERLDDANISNQLVTFLIAGHETTSGLLSFAV     | 284 |
| ABD83817.1 | A-----SDGKKDMLNAMMSGVDRSTGEQLDDVNIRYQINTFLIAGHETTSGLLSYAI    | 284 |
| ADU39615.1 | D-----IATKPDLLSYMIAGVDKKSQEQLTDKMIRDECIEFLIAGHETTSGLLSFAI    | 283 |
| EJL72014.1 | D-----IATKPDLLSYMIAGVDKKSQEQLTDKMIRDECIEFLIAGHETTSGLLSFAI    | 283 |

|                        |                                                                  |     |
|------------------------|------------------------------------------------------------------|-----|
| sp P14779.2 CPXB_PRIM2 | YFLVKNPHVLQKAAEEAARVLVDPV---PSYKQVKQLKYVGMVLNEALRLWPTAPAFSLY     | 335 |
| ADF40088.1             | YFLVKNPHVLQKAAEEAARVLVDPV---PSYKQVKQLKYVGMVLNEALRLWPTAPAFSLY     | 335 |
| ADE70259.1             | YFLVKNPHVLQKAAEEAARVLVDPV---PSYKQVKQLKYVGMVLNEALRLWPTAPAFSLY     | 335 |
| AEN88827.1             | YFLVKNPHVLQKAAEEAARVLVDPV---PSYKQVKQLKYVGMVLNEALRLWPTAPAFSLY     | 335 |
| KFN05180.1             | YFLVKNPHVLQKAAEEAARVLVDPV---PSYKQVKQLKYVGMVLNEALRLWPTAPAFSLY     | 335 |
| ACZ37122.1             | YFLVKNPHVLQKAAEEAARVLVDPV---PSYKQVKQLKYVGMVLNEALRLWPTAPAFSLY     | 335 |
| ADA57055.1             | YFLVKNPHVLQKAAEEATRVLVDPV---PSYKQVKQLKYVGMVLNEALRLWPTAPAFSLY     | 335 |
| ADA57058.1             | YFLVKNPHVLQKAAEEAARVLVDPV---PSYKQVKQLKYVGMVLNEALRLWPTAPAFSLY     | 335 |
| ADA57059.1             | YFLVKNPHVLQKAAEEAARVLVDPV---PSYKQVKQLKYVGMVLNEALRLWPTAPAFSLY     | 335 |
| ADA57061.1             | YFLVKNPHVLQKAAEEAARVLVDPV---PSYKQVKQLKYVGMVLNEALRLWPTAPAFSLY     | 335 |
| ADA57062.1             | YFLVKNPHVLQKAAEEATRVLVDPV---PSYKQVKQLKYVGMVLNEALRLWPTAPAFSLY     | 335 |
| ADA57068.1             | YFLVKNPHVLQKAAEEAARVLVDPV---PSYKQVKQLKYVGMVLNEALRLWPTAPAFSLY     | 335 |
| AAT62301.1             | YFLLKNPDKLKKAYEEVDRVLT DST---PTYQQVMKLKYIRMI LNESLRLWPTAPAFSLY   | 338 |
| AAM54108.1             | HRLLAHPEVLRKAKDAVDGVLGDRV---PAFEDLARLDYLGQVLR ETLRLHPTAPAFALA    | 342 |
| EFQ83738.1             | YYLARHPEILARAQAETDEILGPDPAVPEFEQVAKFRYLRRVLDEALRLWPTAPAFGRG      | 343 |
| EFL88452.1             | YYLLQHPDILDRCYEEVDRVLGRDISPPDLSKVNQLTYINQVLSEALRLWPTAPALGLA      | 341 |
| BAF89518.1             | YHLWKYPETMEKLI AEVDEV LGRDFS YKPTYEDVGR LAYTQRVLKEALRLC PVPMPFRY | 433 |
| CBI43648.1             | YCLLNKNDKLLKAIQEAERVLTGET---PEYKQIQQLTYIRMV LNETLRLYPTAPAFSLY    | 337 |
| AEB22839.1             | YFLLKHPRVLEKAYEEADRVL TDPV---PSYKQVLELTYIRMI LQESLRLWPTAPAFSLY   | 337 |
| EDT22025.1             | YFLLKNPDKLKKAYEEVDRVLT DST---PTYQQVMKLKYIRMI LNESLRLWPTAPAFSLY   | 338 |
| AFH84458.1             | YFLLKNPDKLKKAYEEVDRVLT DST---PTYQQVMKLKYIRMI LNESLRLWPTAPAFSLY   | 346 |
| ADP31197.1             | YFLLKNPDKMKKAYEEVDQVLTGPT---PTYKQVLQLSYIRMI LNESLRLWPTAPAFSLY    | 337 |
| ACP19384.1             | YFLLKNPDKLKKAYEEVDRVLT DPT---PTYEQVMKLKYIRMI LNESLRLWPTAPAFSLY   | 338 |
| ADL27534.1             | YFLLKNPDKLKKAYEEVDRVLT DPT---PTYQQVMKLKYIRMI LNESLRLWPTAPAFSLY   | 338 |
| ACO29732.1             | YFLLKNPDKLKKAYEEVDRVLT DPT---PTYQQVMKLKYIRMI LNESLRLWPTAPAFSLY   | 338 |
| EDX65100.1             | YFLLKNPDKLKKAYEEVDRVLT DPT---PTYQQVMKLKYIRMI LNESLRLWPTAPAFSLY   | 338 |
| EEK61456.1             | YFLLKNPDKLKKAYEEVDRVLT DPT---PTYQQVMKLKYIRMI LNESLRLWPTAPAFSLY   | 338 |
| EEL16232.1             | YFLLKNPDKLKKAYEEVDRVLT DPT---PTYQQVMKLKYIRMI LNESLRLWPTAPAFSLY   | 346 |
| EDZ53094.1             | YFLLKNPDKLKKAYEEVDRVLT DPT---PTYQQVMKLKYIRMI LNESLRLWPTAPAFSLY   | 338 |
| EEL81346.1             | YFLLKNPDKLKKAYEEVDRVLT DPT---PTYQQVMKLKYIRMI LNESLRLWPTAPAFSLY   | 352 |
| EEL87105.1             | YFLLKNPDKLKKAYEEVDRVLT DPT---PTYQQVMKLKYIRMI LNESLRLWPTAPAFSLY   | 352 |
| EEL75761.1             | YFLLKNPDKLKKAYEEVDRVLT DPT---PTYEQVMKLKYIRMI LNESLRLWPTAPAFSLY   | 279 |
| ACK88541.1             | YFLLKNPDKLKKAYEEVDRVLT DPT---PTYQQVMKLKYIRMI LNESLRLWPTAPAFSLY   | 338 |
| EJQ05303.1             | YFLLKNPDKLEKAYEEVDRVLT DPT---PTYQQVMKLKYIRMI LNESLRLWPTAPAFSLY   | 338 |
| EEK50040.1             | YFLLKNPDKLKKAYEEVDRVLT DAT---PTYQQVMKLKYIRMI LNESLRLWPTAPAFSLY   | 338 |
| AAS42149.1             | YFLLKNPDKLKKAYEEVDRVLT DPT---PTYQQVMKLKYIRMI LNESLRLWPTAPAFSLY   | 338 |
| AAP10153.1             | YFLLKNPDKLKKAYEEVDRVLT DPT---PTYQQVMKLKYMRMI LNESLRLWPTAPAFSLY   | 338 |
| EEK83466.1             | YFLLKNPDKLKKAYEEVDRVLT DPT---PTYQQVMKLKYIRMI LNESLRLWPTAPAFSLY   | 346 |

|            |                                                                |     |
|------------|----------------------------------------------------------------|-----|
| ACK63698.1 | YFLLKNPDKLKKAYEEVDRVLTDPDPT---PTYEQVMKLYIRMI LNESLRLWPTAPAFSLY | 279 |
| EJS57156.1 | YFLLKNPDKLKKAYEEVDRVLTDPDPT---PTYQQVMKLYIRMI LNESLRLWPTAPAFSLY | 338 |
| EJS56605.1 | YFLLKNPDKLKKAYEEVDRVLTDPDPT---PTYQQVMKLYIRMI LNESLRLWPTAPAFSLY | 338 |
| EJS68951.1 | YLLKNPDKLRKAYEEVDRVLTGPT---PTYQQVLQLKYIRMI LNESLRLWPTAPAFSLY   | 337 |
| EJQ10567.1 | YFLLKNPDKLKKAYEEVDRVLTDPDPT---PTYQQVMKLYIRMI LNESLRLWPTAPAFSLY | 338 |
| EJQ13433.1 | YFLLKNPDKLKKAYEEVDRVLTDPDPT---PTYQQVMKLYIRMI LNESLRLWPTAPAFSLY | 338 |
| EJQ20399.1 | YFLLKNPDKLKKAYEEVDRVLTDPDPT---PTYQQVMKLYIRMI LNESLRLWPTAPAFSLY | 338 |
| EJQ30236.1 | YFLLKNPDKLKKAYEEVDRVLTDPDPT---PTYQQVMKLYIRMI LNESLRLWPTAPAFSLY | 338 |
| EJQ51278.1 | YLLKNPDKLRKAYEEVDRVLTGPT---PTYQQVLQLKYIRMI LNESLRLWPTAPAFSLY   | 337 |
| EEL10858.1 | YFLLKNPDKLKKAYEEVDRVLTDPDPT---PTYQQVMKLYMRMI LNESLRLWPTAPAFSLY | 338 |
| EEL05393.1 | YFLLKNPDKLKKAYEEVDRVLTDPDPT---PTYQQVMKLYIRMI LNESLRLWPTAPAFSLY | 352 |
| EEK94080.1 | YFLLKNPDKLKKAYEEVDRVLTDPDPT---PTYQQVMKLYIRMI LNESLRLWPTAPAFSLY | 341 |
| EEK99882.1 | YFLLKNPDKLEKAYEEVDRVLTDPDPT---PTYQQVMKLYIRMI LNESLRLWPTAPAFSLY | 341 |
| EEK55784.1 | YFLLKNPDKLKKAYEEVDRVLTDPDPT---PTYQQVMKLYIRMI LNESLRLWPTAPAFSLY | 346 |
| ADK05784.1 | YFLLKNPDKLKKAYEEVDRVLTDPDPT---PTYQQVMKLYIRMI LNESLRLWPTAPAFSLY | 338 |
| AAU17340.1 | YFLLKNPDKLKKAYEEVDRVLTDPDPT---PTYQQVMKLYIRMI LNESLRLWPTAPAFSLY | 338 |
| EEL64394.1 | YFLLKNPDKLKKAYEEVDRVLTDPDPT---PTYQQVMKLYIRMI LNESLRLWPTAPAFSLY | 338 |
| AEW56259.1 | YFLLKNPDKLKKAYEEVDRVLTDPDPT---PTYQQVMKLYIRMI LNESLRLWPTAPAFSLY | 338 |
| AFQ11690.1 | YFLLKNPDKLKKAYEEVDRVLTDPDPT---PTYQQVMKLYIRMI LNESLRLWPTAPAFSLY | 338 |
| EAL16831.1 | YFLLKNPDKLKKAYEEVDRVLTDPDPT---PTYQQVMKLYIRMI LNESLRLWPTAPAFSLY | 338 |
| ACK94296.1 | YFLLKNPDKLKKAYEEVDRI LDPDPT---PTYQQVMKLYIRMI LNESLRLWPTAPAFSLY | 338 |
| EDZ58760.1 | YFLLKNPDKLEKAYEEVDRVLTDPDPT---PTYQQVMKLYIRMI LNESLRLWPTAPAFSLY | 338 |
| EJV84218.1 | YFLLKNPDKLKKAYEEVDRVLTDPDPT---PTYQQVMKLYIRMI LNESLRLWPTAPAFSLY | 338 |
| EJQ69212.1 | YFLLKNPDKLKKAYEEVDRVLTDPDPT---PTYQQVMKLYIRMI LNESLRLWPTAPAFSLY | 338 |
| EJQ80339.1 | YFLLKNPDKLKKAYEEVDRVLTDPDHT---PTYQQVMKLYIRMI LNESLRLWPTAPAFSLY | 338 |
| EJV81602.1 | YFLLKNPDKLKKAYEEVDRVLTDPDPT---PTYQQVMKLYIRMI LNESLRLWPTAPAFSLY | 338 |
| EJQ95474.1 | YFLLKNPDKLKKAYEEVDRVLTDPDPT---PTYQQVMKLYIRMI LNESLRLWPTAPAFSLY | 338 |
| EEK44229.1 | YFLLKNPDKLKKAYEEVDRVLTDPDPT---PTYQQVMKLYIRMI LNESLRLWPTAPAFSLY | 346 |
| EEK88560.1 | YFLLKNPDKLKKAYEEVDRVLTDPDPT---PTYEQVMKLYIRMI LNESLRLWPTAPAFSLY | 338 |
| EJR07451.1 | YFLLKNPDKLKKAYEEVDRI LDPDPT---PTYQQVMKLYIRMI LNESLRLWPTAPAFSLY | 338 |
| EJR16542.1 | YFLLKNPDKLKKAYEEVDRVLTDPDPT---PTYQQVMKLYIRMI LNESLRLWPTAPAFSLY | 338 |
| BAL18840.1 | YFLLKNPDKLEKAYEEVDRVLTDPDPT---PTYQQVMKLYIRMI LNESLRLWPTAPAFSLY | 338 |
| EDX69960.1 | YFLLKNPDKLKKAYEEVDRVLTDPDST---PTYQQVMKLYIRMI LNESLRLWPTAPAFSLY | 338 |
| ACM13462.1 | YFLLKNPDKLKKAYEEVDRVLTDPDPT---PTYQQVMKLYIRMI LNESLRLWPTAPAFSLY | 338 |
| EEK75631.1 | YFLLKNPDKLKKAYEEVDRVLADST---PTYQQVMKLYIRMI LNESLRLWPTAPAFSLY   | 338 |
| EEL25491.1 | YFLLKNPDKLKKAYEEVDRVLTDPDST---PTYQQVMKLYIRMI LNESLRLWPTAPAFSLY | 279 |
| EEL21990.1 | YFLLKNPDKLKKAYEEVDRVLTDPDPT---PTYQQVMKLYIRMI LNESLRLWPTAPAFSLY | 346 |
| EEL33825.1 | YFLLKNPDKLKKAYEEVDRVLTDPDPT---PTYQQVMKLYIRMI LNESLRLWPTAPAFSLY | 346 |

|                        |                                                                 |     |
|------------------------|-----------------------------------------------------------------|-----|
| EEL44933.1             | YFLLKNPDKLKKAYEEVDRVLTDPDPT---PTYQQVMKLYIRMI LNESLRLWPTAPAFSLY  | 346 |
| EEL50167.1             | YLLKNLDKLRKAYEEVDQVLTGPT---PTYQQVLQLKYIRMI LNESLRLWPTAPAFSLY    | 416 |
| EJR22930.1             | YFLLKNPDKLKKAYKEVDRVLTDPDPT---PTYQQVMKLYIRMI LNESLRLWPTAPAFSLY  | 338 |
| EJP91231.1             | YFLLKNPDKLKKAYEEVDRIILTDPT---PTYQQVMKLYIRMI LNESLRLWPTAPAFSLY   | 338 |
| EJR37623.1             | YFLLKNPDKLKKAYEEVDRVLTDPDPT---PTYQQVMKLYIRMI LNESLRLWPTAPAFSLY  | 338 |
| EJR50635.1             | YFLLKNPDKLKKAYEEVDRVLTDPDPT---PTYQQVMKLYIRMI LNESLRLWPTAPAFSLY  | 338 |
| EJR64551.1             | YFLLKNPDKLKKAYEEVDRVLTDPDPT---PTYQQVMKLYIRMI LNESLRLWPTAPAFSLY  | 338 |
| EJR75620.1             | YFLLKNPDKLKKAYEEVDRVLTDPDPT---PTYEQVMKLYIRMI LNESLRLWPTAPAFSLY  | 338 |
| EJR82049.1             | YFLLKNPDKLKKAYEEVDRVLTDPDPT---PTYQQVMKLYIRMI LNESLRLWPTAPAFSLY  | 338 |
| EJR83659.1             | YFLLKNPDKLKKAYEEVDRVLTDPDPT---PTYQQVMKLYIRMI LNESLRLWPTAPAFSLY  | 338 |
| EJR91135.1             | YLLKQPEVLKAYEEVDHVI TGSV---PTYQQVLQLKYIRMI LNESLRLWPTAPV FALY   | 336 |
| EJR97241.1             | YFLLKNPDKLKKAYEEVDRVLTNPDPT---PTYEQVMKLYIRMI LNESLRLWPTAPAFSLY  | 338 |
| EJS05852.1             | YFLLKNPDKLKKAYEEVDRVLTDPDPT---PTYQQVMKLYIRMI LNESLRLWPTAPAFSLY  | 338 |
| EDX58768.1             | YFLLKNPDKLKKAYEEVDRVLTDPDPT---PTYQQVMKLYIRMI LNESLRLWPTAPAFSLY  | 338 |
| AAU24352.1             | YLLKHPDKLKKAYEEADRVLTDPV---PSYQVQQLKYIRMI LNESIRLWPTAPAFSLY     | 337 |
| ABY44122.1             | YFLLKNPDKLKKAYEEVDRVLTDPDPT---PTYQQVMKLYIRMI LNESLRLWPTAPAFSLY  | 338 |
| EDW23201.1             | YFLLKNPEKLLKAVQEADDVLQGGGL---PTFKQVQKLN YTRMVLNESLRLWPTAPT FSLY | 336 |
| ABV62358.1             | YFLLKNPEKLLKAVQEADDVLQGGGL---PTFKQVQKLT YTRMVLNEALRLWPTAPT FSLY | 336 |
| EIF12263.1             | YFLLKHPVLEKAYEEADRVLTDPV---PSYQVLELSYIRMI LQESLRLWPTAPAFSLY     | 336 |
| EIF14027.1             | YCLLNKDKLKKAVQEAERVLTGET---PEYKQIQQLTYIRMV LNETLRLYPTAPAFSLY    | 337 |
| EHL75405.1             | YFLLKNPDKLKKAYEEVDRVLTDPDPT---PTYQQVMKLYIRMI LNESLRLWPTAPAFSLY  | 338 |
| EJD67577.1             | YFLLKHPVLEKAYEEADRVLTDPV---PSYQVLDLTYIRMI LQESLRLWPTAPAFSLY     | 336 |
| EJD68347.1             | YCLLNKDKLKKAVQEAERVLTGET---PEYKQIQQLTYIRMV LNETLRLYPTAPAFSLY    | 337 |
| EFV73436.1             | YLLKHPDKLKKAYEEADRVLTDPV---PSYQVQQLKYIRMI LNESIRLWPTAPAFSLY     | 351 |
| CBY93692.1             | YFLLKNPDKLKKAYEEVDRVLTDPDPT---PTYQQVMKLYIRMI LNESLRLWPTAPAFSLY  | 338 |
| AFI27355.1             | YFLLKHPDKLKKAYEEVERVLTDA---PTYQVLELKYIRMI LNESLRLWPTAPAFSLY     | 337 |
| AFI29229.1             | YCLLTHPEKLLKQEEADRVLTDDT---PEYKQIQQLKYIRMV LNETLRLYPTAPAFSLY    | 337 |
| EIL85422.1             | YFLLKNPEKLLKAVHEADEVLQDGL---PTFKQVQQLSYTRM VLHEALRLWPTAPS FSVY  | 336 |
| ADV93500.1             | YCLLTHPEKLLKQEEADRVLTDDT---PEYKQIQQLKYTRM VLNETLRLYPTAPAFSLY    | 337 |
| ADV95715.1             | YFLLKHPDKLKKAYEEVDRVLTDA---PTYQVLELTYIRMI LNESLRLWPTAPAFSLY     | 337 |
| BAI84248.1             | YFLLKHPDKLKKAYEEVDRVLTDA---PTYQVLELTYIRMI LNESLRLWPTAPAFSLY     | 337 |
| EFG90288.1             | YCLLTHPEKLLKQEEADRVLTDDT---PEYRQIQQLKYIRMV LNETLRLYPTAPAFSLY    | 337 |
| EFG91781.1             | YFLLKHPDKLKKAYEEVDRVLTGAA---PTYQVLELKYIRMI LNESLRLWPTAPAFSLY    | 337 |
| AEP85668.1             | YFLLKHPDKLEKAYEEVDRVLTGAA---PTYQVLELKYIRMI LNESLRLWPTAPAFSLY    | 337 |
| AEP87558.1             | YCLLTHPEKLLKQEEADRVLTDDT---PEYRQIQQLKYIRMI LNETLRLYPTAPAFSLY    | 337 |
| sp 008336.1 CYPB_BACSU | YCLLTHPEKLLKQEEADRVLTDDT---PEYKQIQQLKYIRMV LNETLRLYPTAPAFSLY    | 337 |
| sp 008394.1 CYPD_BACSU | YFLLKHPDKLKKAYEEVDRVLTDA---PTYQVLELTYIRMI LNESLRLWPTAPAFSLY     | 337 |
| AEP89812.1             | YFLLKHPDKLKKAYEEVDRVLTDA---PTYQVLELKYIRMI LNESLRLWPTAPAFSLY     | 337 |

|            |                                                                 |     |
|------------|-----------------------------------------------------------------|-----|
| AEP91702.1 | YCLLTHPEKLLKKAQEEADRVLTDDT---PEYKQIQQLKYIRMVNNETLRLYPTAPAFSLY   | 337 |
| EHA31094.1 | YCLLTHPEKLLKKAQEEADRVLTDDT---PEYKQIQQLKYTRMVNNETLRLYPTAPAFSLY   | 339 |
| ADH07708.1 | YFLLKNPDKLLKAYEEVDRVLTDPDPT---PTYQQVMKLYIRMI LNESLRLWPTAPAFSLY  | 338 |
| EEM28177.1 | YFLLKNPDKLLKAYEEVDRVLTDPDPT---PTYQQVMKLYIRMI LNESLRLWPTAPAFSLY  | 338 |
| AFQ14162.1 | YFLLKNPDKLLKAYEEVDRI L TDPT---PTYQQVMKLYIRMI LNESLRLWPTAPAFSLY  | 338 |
| EEM95517.1 | YFLLKNPDKLLKAYEEVDRVLKDLT---PTYQQVMKLYIRMI LNESLRLWPTAPAFSLY    | 338 |
| EEN02344.1 | YFLLKNPDKLLKAYEEVDRI L TDPT---PTYQQVMKLYIRMI LNESLRLWPTAPAFSLY  | 338 |
| AFU13781.1 | YFLLKNPDKLLKAYEEVDRVLTDPDPT---PTYQQVMKLYIRMI LNESLRLWPTAPAFSLY  | 346 |
| EEM70897.1 | YFLLKNPDKLLKAYEEVDRVLTDPDPT---PTYQQVMKLYIRMI LNESLRLWPTAPAFSLY  | 346 |
| ADY22413.1 | YFLLKNPDKLLKAYEEVDRVLTDPDPT---PTYQQVMKLYIRMI LNESLRLWPTAPAFSLY  | 338 |
| EEM82895.1 | YFLLKNPDKLLKAYKEVDRVLTDPDPT---PTYQQVMKLYIRMI LNESLRLWPTAPAFSLY  | 338 |
| EEM52818.1 | YFLLKNPDKLLKAYEEVDRVLTDPDPT---PTYQQVMKLYIRMI LNESLRLWPTAPAFSLY  | 338 |
| EEM59126.1 | YFLLKNPDKLLKAYEEVDRVLTDPDPT---PTYQQVMKLYIRMI LNESLRLWPTAPAFSLY  | 346 |
| EEM47193.1 | YFLLKNPDKLLKAYEEVDRVLTDPDPT---PTYEQVMKLYIRMI LNESLRLWPTAPAFSLY  | 279 |
| EEM76899.1 | YFLLKNPDKLLKAYEEVDRVLTDPDPT---PTYQQVMKLYIRMI LNESLRLWPTAPAFSLY  | 346 |
| EEM88909.1 | YFLLKNPDKLLKAYEEVDRVLTDPDPT---PTYQQVMKLYIRMI LNESLRLWPTAPAFSLY  | 346 |
| EEM38196.1 | YFLLKNPDKLLKAYEEVDRI L TDPT---PTYQQVMKLYIRMI LNESLRLWPTAPAFSLY  | 338 |
| EEM21858.1 | YFLLKNPDKLLKAYEEVDRVLTDPDPT---PTYQQVMKLYIRMI LNESLRLWPTAPAFSLY  | 341 |
| ABK86139.1 | YFLLKNPDKLLKAYEEVDRVLTDPDPT---PTYQQVMKLYIRMI LNESLRLWPTAPAFSLY  | 346 |
| EJQ37805.1 | YFLLKNPDKLLKAYEEVDRVLTDPDPT---PTYQQVMKLYIRMI LNESLRLWPTAPAFSLY  | 338 |
| CCF04242.1 | YFLLKHPRVLEKAYEEADRVLTDPV---PSYQVLELSYIRMI LQESLRLWPTAPAFSLY    | 336 |
| CCF05972.1 | YCLLKNKDKLLKAVQEAERVLTGET---PEYKQIQQLTYIRMVNNETLRLYPTAPAFSLY    | 337 |
| ABS73124.1 | YFLLKHPRVLEKAYEEADRVLTDPV---PSYQVLDLTYIRMI LQESLRLWPTAPAFSLY    | 336 |
| ABS74786.1 | YCLLKNKDKLLKAVQEAERVLTGET---PEYKQIQQLTYIRMVNNETLRLYPTAPAFSLY    | 337 |
| EKE46398.1 | YFLLKHPRVLEKAYEEADRVLTDPV---PSYQVLELSYIRMI LQESLRLWPTAPAFSLY    | 336 |
| EKE48022.1 | YCLLKNKDKLLKAVQEAERVLTGET---PEYKQIQQLTYIRMVNNETLRLYPTAPAFSLY    | 337 |
| CCG48683.1 | YFLLKHPRVLEKAYEEADRVLTDPV---PSYQVLDLTYIRMI LQESLRLWPTAPAFSLY    | 336 |
| AFJ60789.1 | YFLLKHPRVLEKAYEEADRVLTDPV---PSYQVLDLTYIRMI LQESLRLWPTAPAFSLY    | 343 |
| AFJ62808.1 | YCLLKNKDKLLKAVQEAERVLTGET---PEYKQIQQLTYIRMVNNETLRLYPTAPAFSLY    | 337 |
| EEK66903.1 | YFLLKNPDKLLKAYEEVDQVLTDPDPT---PTYQQVMELKYIRMI LNESLRLWPTAPAFSLY | 352 |
| EJQ52935.1 | YFLLKNPDKLLKAYEEVDRVLTDPDPT---PTYQQVMKLYIRMI LNESLRLWPTAPAFSLY  | 338 |
| EJS69574.1 | YFLLKNPDKLLKAYEEVDRVLTDPDPT---PTYQQVMKLYIRMI LNESLRLWPTAPAFSLY  | 338 |
| EJV63294.1 | YFLLKNPDKLLKAYEEVDRVLTDPDPT---PTYQQVMKLYIRMI LNESLRLWPTAPAFSLY  | 338 |
| EKF35778.1 | YFLLKNPDKLLKAVQEAADDVLQDGL---PSFKQMQLSYTRMVNNEALRLWPTAPAFSLY    | 336 |
| EGP08506.1 | YAMKHPVLRKAYEEVDRVLGADINAKPTFQOVTQLHYISQILKESLRMWPPAPAYGVS      | 344 |
| BAL78328.1 | YALLKHPDILKKAYDEVDRVFGPDVNAKPTYQQVTQLTYITQILKEALRLWPPAPAYGIS    | 344 |
| BAC48147.1 | YALLKHPDILKKAYDEVDRVFGPDVNAKPTYQQVTQLTYITQILKEALRLWPPAPAYGIS    | 344 |
| BAL12135.1 | YALLKHPDILKKAYDEVDRVFGPDVNAKPTYQQVTQLTYITQILKEALRLWPPAPAYGIS    | 344 |

|            |                                                                 |     |
|------------|-----------------------------------------------------------------|-----|
| CCE00185.1 | YALLKHPEILKKAYDEVDRVFGPDVDAKPTYQQVQTQLTYITQILKESLRLWPPAPAYGIA   | 348 |
| EIG57609.1 | YALLKHDPILKKAYDEVDRVFGPDANAKPTYQQVQTQLTYITQILKEALRLWPPAPAYGIS   | 344 |
| EHR02046.1 | YALLKHDPILKKAYDEVDRVLGPNVDVRPTYQQVQTQLTYITQILKEALRLWPPAPAYGIS   | 344 |
| EJN11211.1 | YALLKHDPILKKAYDEVDRVDFGPDVNAKPTYQQVQTQLTYITQILKEALRLWPPAPAYGIS  | 344 |
| CCF15606.1 | YFLLKNPDKLQKAYEEVDRVLTGST---PTYTEVRNLAYISMILNESLRLWPTAPAFSLY    | 279 |
| CCF12687.1 | YFLLKNPKVREKAYQEVDRVLTGVS---PSYQQVLQQLTYVRMILQESLRLWPTAPGFELT   | 337 |
| ABB05850.1 | YFLLKNPDILQKARMDVDEVVVGSET---PRIEHLARLRYVEQILMETLRIWPTAPGFAVK   | 339 |
| EHP43606.1 | YELLRHPGVLAQAYADEVDAVLPGD--APPVYADLAKLQVIDRVLKETLRLWPTAPAFAVA   | 367 |
| ABF10339.1 | YELLRNPGVLAQAYADEVDTVLPGD--ALPVYADLARMPVLDLRLKETLRLWPTAPAFAVA   | 343 |
| CAJ95800.1 | YELLRNPGVMAQAYADEVDAVLPGD--AAPVYADLARLPVLDLRLKETLRLWPTAPAFAVA   | 369 |
| AEI79937.1 | YELLRNPGVMAQAYADEVDAVLPGD--AAPVYADLARLPVLDLRLKETLRLWPTAPAFAVA   | 369 |
| AFD27790.1 | HFLLRDPEVLRREAREEVDRVLGDRA---VRVTDLPKLTYLQVLDQVLRQVLRQVLRQVLRQV | 337 |
| ABC62112.1 | YYLLKNRDVLRAYAEVDEVVLRNIDQTPTLSQIGRLPYIRAILSEALRLWPTAPAMGLA     | 342 |
| EAQ27850.1 | YYLLKNRDVLRTRAYAEVDEVVLRNIDQPPSLKQIGQLPYIRAILFEALRLWPTAPAFGLA   | 342 |
| EIT84377.1 | YFLLQHPDVLQKAQQEADAILSD-T---PTYEEVTQLKYIRMILHETLRLWPSAPAFGLY    | 336 |
| CCG43686.1 | HYLMKNPDKLKKAQEEVDEVIGEDI---PSYQVKKLKYVRMILNEALRLWPTAPAFSVY     | 337 |
| ABX05160.1 | YFLLQQPEILQRAQAIVDQVLGDRL---PRYEDLAKLGYLDQILRETLRLWPTAPVFGVY    | 341 |
| BAJ96920.1 | YELLKNPSTLQKAREEVDKVLGTDR---ITIDHIPKLVYLNQILKETLRLYPSAPAFTRA    | 335 |
| GAB96874.1 | YELLKNPDVLEAARAKVDEVVLDGDRF---PTYADLSELGYLDQILRESLRLWPTAPAFGLH  | 377 |
| EFH80345.1 | YFLLKHPEVLAKAYDEVDRVLGPDTSAKPTFQQINKLQYVSQILKESLRLWPTAPLFSVY    | 345 |
| EFH88481.1 | YFLLHHPDVLNRAYEEVDRVLGRDTRKTPTYEQIHQLVYIKQILKETLRLCPTAPMFNRY    | 338 |
| EAW32450.1 | QYLIKHPAVLKRAYAEVDEVVLDGSDITTPPTLAQLGRLPYIRQVLEALRLYPTAPAFTRA   | 339 |
| EIZ82104.1 | YLLLRNPDVLRARDQVDAVLGDGL---PRVEDLPRMRYVEQILQETLRLWPTAPAFAVA     | 338 |
| AEV70722.1 | YNLMHHPAVLARVEAEVDGVFGADSDYLPGYDDIGKLSYLRQVIDETLRLSPPVVGFDRL    | 333 |
| EFC41452.1 | YELLKHPEVLKKAQKEVDTVIGNEN---IQIKHIPQLVYLDQILKETLRLWPTAPGFGLG    | 365 |
| ACV78954.1 | HHLAAQPQVQDWAREQVDEVVLDGSDRSVLPMEQVQGLDRIHQIVDETLLRHPTAPVLLRH   | 339 |
| ACV78964.1 | YYLIKHPFAERARADEVVLDGDDA--EPSYDQVRRQVVAQVLDLRLMPTAPIFTRA        | 342 |
| ACV81379.1 | NYLMKSPQYIDQARVQIDEVLGDTA--EPTYEQVHQVQVLRQILDESRLWPTAPMFTRA     | 342 |
| EIZ78677.1 | YFLMRNPEVMARARETVDTVLGGER---PKVEDLAKLRYIEQILQEALRLWPTAPAFAVS    | 336 |
| EJW15291.1 | YFLLNDRDKLQKGYEEVDRVLKDPV---PTYTQVKNLRYIRMILDESRLWPTAPAFNLL     | 336 |
| EJW16173.1 | YYLLKHPAQLQKAYEEVDRVLTDPV---PTYAQVRLPYIRMILNESLRLWPTAPAFSLF     | 339 |
| EHQ58913.1 | YYLLNNEPKLQKGYDEVDRVLTDPV---PTYAQVKNLKYVRMILDEALRLWPTAPGFSLQ    | 336 |
| EHQ59900.1 | YYLLKNPEKLQKAYEEVDRVLTPEV---PTYTRVRELKYIRMILNEALRLWPTAPAFSLY    | 337 |
| EHB66924.1 | YFLMKNPDKLQKAVSEVDRVLKDPV---PSYNQVRELKYVRMVLNESLRLWPTAPAFSLY    | 336 |
| AFH60445.1 | YFLLKNPEKLAKAYEEVDRVLTSPV---PTYSQVRELKYIRMILNESLRLWPTAPAFALT    | 337 |
| AEI42011.1 | YFLLKNPEKLAKAYEEVDRVLTSPV---PTYSQVRELKYIRMILNESLRLWPTAPAFALT    | 337 |
| ADO57681.1 | YYLLKNPRTLTKAYEEVDRVLTDSL---PSYTQVRELKYIRMILNEALRLWPTAPAFSLF    | 337 |
| EGG32133.1 | YYLMKNPEALFKAVSEVDRVLKDPV---PTYNQVRELKYVRMVLNESLRLWPTAPAFSLY    | 337 |

|            |                                                                  |     |
|------------|------------------------------------------------------------------|-----|
| EGL17662.1 | YFLLKNPDKLRKAYEEVDRVLTDPV---PTYGQVRELTYIRMI LNEALRLWPTAPAFVLY    | 338 |
| ACX65034.1 | YYLMKNPEALFKAVSEVDRVLKDPV---PTYNQVRELKYVRMVLNESLRLWPTAPAFSLY     | 337 |
| ACT11327.1 | YFLLKNPNVLNKARAI VDEVLGDEI---PRIEHLAQLRYLEQI LMESLRMWPTAGGHVVS   | 338 |
| AEA28016.1 | AYLIKHPDVVAKAQAEVDRVLGTDPGVMPSFQQVQGLTYVTQI LNEILRLWPTAPGFTRY    | 347 |
| EFP68091.1 | YMLLRHPAVLAQAYA EVDRLVPGD--TVPQYAHLAQLDVI ERVLKETLRLWPTAPSGVA    | 353 |
| EGY61507.1 | YMLLRHPAVLAQAYA EVDRLVPGD--TVPQYAHLAQLDVI ERVLKETLRLWPTAPSGVA    | 353 |
| EIE85788.1 | YELAKHPEVQAKVLQE IADNHIT-HEKAPTPEQISNLKYM HQVFKEVLRKYPPVRNLSKY   | 424 |
| EIE92534.1 | YELSRHPDIQAKVLQE IADNHIR-HDELPNTEQINN LKYM HQVLKEVLRKYPPVRVLSKY  | 424 |
| BAE46296.1 | YFLSRHPDVADTARA EVDVTDAG-E-TP-AFEDVARMRY LRRVDETLRLWPSAPGYFRK    | 392 |
| BAH31604.1 | YYLSRNPDLAKAQAE VDKVWEGE---EPAFEKIAKLRY VRRVLDES LRLWPTAPAYGRA   | 348 |
| EEN84644.1 | YYLSRNPDLAKAQAE VDKVWEGE---EPAFEKIAKLRY VRRVLDES LRLWPTAPAYGRA   | 348 |
| EEN88978.1 | YFLSRHPEIADAARA EVDITGG-E-IP-AFEDVAPMRY LRRVDETLRLWPSAPGYFRK     | 432 |
| ABG96413.1 | YYLSRHPDLAKAQAE VDAVWGDE---EPAFEQIAKLRY VRRVLDES LRLWPTAPAYGRE   | 380 |
| BAH52971.1 | YYLSRHPDLAKAQAE VDAVWGDD---EPAFEQIAKLRY VRRVLDES LRLWPTAPAYGRE   | 347 |
| EHI44575.1 | YYLSRHPDLAKAQAE VDAVWGDE---EPAFEQIAKLRY VRRVLDES LRLWPTAPAYGRE   | 382 |
| EID73168.1 | YYLSRHPDLAKAQAE VDAVWGDE---EPAFEQIAKLRY VRRVLDES LRLWPTAPAYGRE   | 347 |
| EHK83749.1 | HFLSRHPEVVAKARA EITEVVGA-DGRI-GYEQVAKLRY VRRVDETLRLWPAAPGYFRK    | 324 |
| EJI96173.1 | YYLSRHPDLAKAQAE VDAVWGDE---EPAFEQIAKLRY VRRVLDES LRLWPTAPAYGRE   | 347 |
| ABI79384.1 | HYLSLNPEIVERAREE IEQVLGT-DGAPVRFEQVAKLRY VRRIIDETLRLWPSGPAFFRK   | 376 |
| CAR47816.1 | HYLSLNPEIVERAREE IDEVFGT-GGVPVRFEQVAKLRY VRRIVDETLRLWPSGPAFFRK   | 378 |
| AEK26937.1 | HFLSRHPEVVAKARA EIAEVVGA-DGRI-GYEQVAKLRY VRRVDETLRLWPAAPGYFRK    | 356 |
| ABE39056.1 | YALLKHPDVLQKAYDE VDRVLGSDTAVRPSYQQVNQLSYITQ I LKETLRMWPPAPAYGVA  | 344 |
| ABD08340.1 | YALLKHPDVLQKAYDE VDRVLGADTSVEPSYQQVNQLGYITQ I LKETLRMWPPAPAYGVA  | 343 |
| CAM03474.1 | HYLAKNPTVLRVLQ READELWGDS PDPEPSFEDIGRLTYTRQ VLNETLRLWPSAPAFGRQ  | 337 |
| EJF54063.1 | YEMLKQPHILARVQA EVDVGLGQEK---LQFHHL SKLKYMDMVIKECLRLWPIASGFNLR   | 352 |
| AFC23737.1 | YEMLKQPHILARVQA EVDVGLGQEK---LQFHHL SKLKYMDMVLKECLRLWPIASGFNLR   | 340 |
| ADG98903.1 | HHLAEQPELARQAQA EVEARWPGRDFPDIGYEDVAKLRY LRRVTDETLRLWPVAPGYFRR   | 351 |
| EGI54680.1 | WLLLTHPEALAKAQAH VDDVLGGNV---PTVDDIGRLTY IEQVLQETLRLWPTAPAFGVH   | 335 |
| AEW97204.1 | YYLAKNPAVLRRAQA EVDALWGDDPDPEPDYTDVGR LTYVRQVLNEALRLWPTAAAFGRQ   | 356 |
| CAJ88567.1 | HYLAQHPGIAARARA EVDRVWGD--EAPGYEQVAKLRY VRRVLDES LRLWPTAPAFARE   | 365 |
| BAC68285.1 | YSLMRNPHILAQA YA EVDRLLPD--TVPDYDTIMQMDVI PRILEETLRLWAPIPMIGKS   | 344 |
| BAC75137.1 | HYLSRHPDVAARARA EVDRVWGGT--ARPGYDQVAKLRY VRRVLDES LRLWPTAPAFARE  | 358 |
| EDY51256.1 | YYLLKNPSVLAARA AETDALWGTD PDPDPPTYEDIGRLHYLRQ VLNESLRLWPTAPAFAVE | 329 |
| EFG07822.1 | YYLLKNPSVLAARA AETDALWGTD PDPDPPTYEDIGRLHYLRQ VLNESLRLWPTAPAFAVE | 361 |
| EHN78335.1 | HYLAQHPDVAARARA EVDRVWGD--EAPGYEQVAKLRH VRRVLDES LRLWPTAPAFARE   | 368 |
| CAB66201.1 | HYLAQHPDVAARARA EVDRVWGD--EAPGYEQVAKLRY VRRVLDES LRLWPTAPGFARE   | 372 |
| EGG48117.1 | YHLSRHPEIAARARA EVDVWGED--PRPGYDRVARLRLV RRI LDES LRLWPTAPAFARE  | 372 |
| EFL20831.1 | YYLTKHPEVLARAQA EVDALWGDTDAPEPDYGDIGK LTYIRQVLNEGLRLWPTAPVYAVE   | 351 |

|            |                                                               |     |
|------------|---------------------------------------------------------------|-----|
| EFL28515.1 | HYLAKNPGELRRVQREADALFGADADPEPTFEQVGLLRYTRQVLNEALRLWPTAAAFSRQ  | 345 |
| AEY93311.1 | HHLARHPEIAARARAQVWVWGDTPRPGYDQVARLRYVRRVLDESRLWPTAPAFARE      | 362 |
| AEY93321.1 | YYLAKHPAVLRLVQREADALWGDTADPEPSYEDIGRLTHTRQVLNEALRLWPTAAAFSRH  | 343 |
| EFD71156.1 | HYLAQHDPVAARARAQVDRVWGDTEAPGYEQVAKLRYVRRVLDESRLWPTAPGFARE     | 374 |
| CBG67789.1 | YYLTKHPEVLARAQAEVDALWGDTDTPDPDYGDIGKLTYIRQVLNEGLRLWPTAPAYAVE  | 346 |
| CBG68112.1 | HYLARYPDLAARARAQVDRVWGDARPGYEQVAKLRYVRRVLDEALRLWPTAPAFSRE     | 363 |
| EFL10082.1 | YYLTRHPELLAKARAQVDAVWGDR--EPAFGDVAKLRYVRRVLDEAMRLWPTAPGYSRE   | 374 |
| EFF88741.1 | YYLTKNPEVLARAQAEVDALWGDTDTPDPEYGDVGKLTYIRQVLNESLRLWPTAPAFVTE  | 345 |
| EDY58112.1 | HYLSRHPEVAARARDEVDVWGDATGAPYEQVAKLRYVRRVLDESRLWPTAPAFARE      | 355 |
| EFL36674.1 | HYLSRHPDVAARARAQVDRVWADAEPAYEQVARLRYVRRVLDESRLWPTAPAFARE      | 372 |
| EFL36680.1 | YYLAKHPTALQLVQREVDDELWGDTADVEPTYDEVGRLTYTRQVLNEALRLWPTAAVFSRE | 393 |
| EFE65335.1 | HYLSRHPDVAARARDEVDVWGDATAAPGYEQVARLRYVRRVLDESRLWPTAPAFARE     | 360 |
| EGX54696.1 | HYLSRHPEVAARARAQVDRVWGDATAAPGYDQVARLRYVRRVLDEALRLWPTAPAFARE   | 357 |
| ACZ89135.1 | HLLLDNPDLLRHARDEVDVWGDALPRFEHLSRLGHIDRILRETLRLYPTAPAFVH       | 341 |
| ABD83817.1 | YALLKHPDVLKKAYAEVDVWGDADIEARPSYQQVTQLTYITQILKEALRLWPPAPAYGIA  | 344 |
| ADU39615.1 | YFLLNNPEAMAKAQAEVDSVFGGDTSQKPTYAQVNRLQYVMQVLKESLRMFPTAPAI SMR | 343 |
| EJL72014.1 | YFLLNNPEAMAKAQAEVDNVFGPDTSQKPTYAQVNRLQYVMQVLKESLRLYPTAPAI SMR | 343 |

: : : \* :\*

|                        |                                                                |     |
|------------------------|----------------------------------------------------------------|-----|
| sp P14779.2 CPXB_PRIM2 | AKEDTVL-GGE-----YPLEK-GDELMVLI PQLHRDKTIWGDDVEEFRPE-RFE--NPSA  | 385 |
| ADF40088.1             | AKEDTVL-GGE-----YPLEK-GDELMVLI PQLHRDKTIWGDDVEEFRPE-RFE--NPSA  | 385 |
| ADE70259.1             | AKEDTVL-GGE-----YPLEK-GDELMVLI PQLHRDKTIWGDDVEEFRPE-RFE--NPSA  | 385 |
| AEN88827.1             | AKEDTVL-GGE-----YPLEK-GDELMVLI PQLHRDKTIWGDDVEEFRPE-RFE--NPSA  | 385 |
| KFN05180.1             | AKEDTVL-GGE-----YPLEK-GDELMVLI PQLHRDKTIWGDDVEEFRPE-RFE--NPSA  | 385 |
| ACZ37122.1             | AKEDTVL-GGE-----YPLEK-GDELMVLI PQLHRDKTIWGDDVEEFRPE-RFE--NPSA  | 385 |
| ADA57055.1             | AKEDTVL-GGE-----YPLEK-GDELMVLI PQLHRDKTIWGDDVEEFRPE-RFE--NPSA  | 385 |
| ADA57058.1             | AKEDTVL-GGE-----YPLEK-GDELMVLI PQLHRDKTIWGDDVEEFRPE-RFE--NPSA  | 385 |
| ADA57059.1             | AKEDTVL-GGE-----YPLEK-GDELMVLI PQLHRDKTIWGDDVEEFRPE-RFE--NPSA  | 385 |
| ADA57061.1             | AKEDTVL-GGE-----YPLEK-GDELMVLI PQLHRDKTIWGDDVEEFRPE-RFE--NPSA  | 385 |
| ADA57062.1             | AKEDTVL-GGE-----YPLEK-GDELMVLI PQLHRDKTIWGDDVEEFRPE-RFE--NPSA  | 385 |
| ADA57068.1             | AKEDTVL-GGE-----YPLEK-GDELMVLI PQLHRDKTIWGDDVEEFRPE-RFE--NPSA  | 385 |
| AAT62301.1             | AKEDTVI-GGK-----YPIKKGEDRISVLI PQLHRDKDAWGDDVEEFQPE-RFE--ELDK  | 389 |
| AAM54108.1             | PDEPAEL-GGH-----AIGA-GEVPLVMLPTLHRDPAVWR-DPDVFDPE-RFAPERMDE    | 392 |
| EFQ83738.1             | PREEVTL-SSG-----HTMRP-GDWAIIVMLPAMHRDPEVWGEDAEFFDPD-RFLPERSRA  | 395 |
| EFL88452.1             | PYEDEIV-GGQ-----YKIKK-GTFTTVLSLMLHRDES VWGDDPEAFNPE-HFTKEAIAA  | 393 |
| BAF89518.1             | VTRDATV-GNG----RYDLKA-GERIFVLSLSAMQKNPRFWGADALVFRPE-RFGPEEEKH  | 486 |
| CBI43648.1             | AKEDTVL-GGK-----YPIAK-GQPVTILTLPQLHRDKSAWGEDAELFRPE-RFS--DPAA  | 387 |
| AEB22839.1             | AKEDTVI-GGK-----YPIIT-KDRISVLI PQLHRDKDAWGDNAEEFYPE-RFE--HPDQ  | 387 |
| EDT22025.1             | AKEDTVI-GGK-----YPIKKGEDRISVLI PQLHRDKDAWGDNVEEFQPE-RFE--ELDK  | 389 |
| AFH84458.1             | AKEDTVI-GGK-----YPIKKGEDRISVLI PQLHRDKDAWGDNVEEFQPE-RFE--ELDK  | 397 |
| ADP31197.1             | AKEDTVI-GGK-----YPIITP-KDRISVLI PQLHRDKDAWGENAEEFHPE-RFE--NPDQ | 387 |
| ACP19384.1             | AKEDTVI-GGK-----YPIKKGEDRISVLI PQLHRDKDAWGDNVEEFQPE-RFE--ELDK  | 389 |
| ADL27534.1             | AKEDTVI-GGK-----YPIKKGEDRISVLI PQLHRDKDAWGDNVEEFQPE-RFE--ELDK  | 389 |
| ACO29732.1             | AKEDTVI-GGK-----YPIKKGEDRISVLI PQLHRDKDAWGDNVEEFQPE-RFE--ELDR  | 389 |
| EDX65100.1             | AKEDTVI-GGK-----YPIKKGEDRISVLI PQLHRDKDAWGDNVEEFQPE-RFE--ELDK  | 389 |
| EEK61456.1             | AKEDTVI-GGK-----YPIKKGEDRISVLI PQLHRDKDAWGDNVEEFQPE-RFE--ELDK  | 389 |
| EEL16232.1             | AKEDTVI-GGK-----YPIKKGEDRISVLI PQLHRDKDAWGDNVEEFQPE-RFE--ELDR  | 397 |
| EDZ53094.1             | AKEDTVI-GGK-----YPIKKGEDRISVLI PQLHRDKDAWGDNVEEFQPE-RFE--ELDK  | 389 |
| EEL81346.1             | AKEDTVI-GGK-----YPIKKGEDRISVLI PQLHRDKDAWGENVEEFQPE-RFE--DLDK  | 403 |
| EEL87105.1             | AKEDTVI-GGK-----YPIKKGEDRISVLI PQLHRDKDAWGDNVEEFQPE-RFE--ELDK  | 403 |
| EEL75761.1             | AKEDTVI-GGK-----YPIKKGKDRISVLI PQLHRDKDAWGDKVVEEFQPE-RFE--EHDK | 330 |
| ACK88541.1             | AKEDTVI-GGK-----YPIKKGKDRISVLI PQLHRDKDAWGDNVEEFQPE-RFE--DLDK  | 389 |
| EJQ05303.1             | AKEDTVI-GGK-----YPIKKGEDRISVLI PQLHRDKDAWGDNVEEFQPE-RFE--ELDK  | 389 |
| EEK50040.1             | AKEDTVI-GGK-----YPIKKGEDRISVLI PQLHRDKDAWGDNVEEFQPE-RFE--ELDK  | 389 |
| AAS42149.1             | AKEDTVI-GGK-----YPIKKGEDRISVLI PQLHRDKDAWGDNVEEFQPE-RFE--DLDK  | 389 |
| AAP10153.1             | AKEDTVI-GGK-----YPIKKGEDRISVLI PQLHRDKDAWGDNVEEFQPE-RFE--ELDK  | 389 |
| EEK83466.1             | AKEDTVI-GGK-----YPIKKGEDRISVLI PQLHRDKDAWGDNVEEFQPE-RFE--ELDN  | 397 |

|            |                                                               |     |
|------------|---------------------------------------------------------------|-----|
| ACK63698.1 | AKEDTVI-GGK-----YPIKKGEDRISVLIPQLHRDKDAWGDNVVEEFQPE-RFE--ELDK | 330 |
| EJS57156.1 | AKENTVI-GGK-----YPIKKGEDRISVLIPQLHRDKDAWGDNVVEEFQPE-RFE--ELDK | 389 |
| EJS56605.1 | AKEDTVI-GGK-----YPIKKGEDRISVLIPQLHRDKDAWGDNVVEEFQPE-RFE--ELDK | 389 |
| EJS68951.1 | SKEDTVI-GGK-----YPVKKREDRIMVLI PQLHRDKDAWGDNAEEFHPE-RFE--DPDK | 388 |
| EJQ10567.1 | AKEDTVI-GGK-----YPIKKGEDRISVLIPQLHRDKDAWGDNVVEEFQPE-RFE--ELDK | 389 |
| EJQ13433.1 | AKEDTVI-GGK-----YPIKKGEDRISVLIPQLHRDKDAWGDNVVEEFQPE-RFE--ELDK | 389 |
| EJQ20399.1 | AKEDTVI-GGK-----YPIKKGEDRISVLIPQLHRDKDAWGDNVVEEFQPE-RFE--ELDK | 389 |
| EJQ30236.1 | AKEDTVI-GGK-----YPIKKGEDRISVLIPQLHRDKDAWGDNVVEEFQPE-RFE--ELDK | 389 |
| EJQ51278.1 | AKEDTVI-GGK-----YPVKKKENRIMVLI PQLHRDKDAWGDNAEEFHPE-RFE--DPDK | 388 |
| EEL10858.1 | AKEDTVI-GGK-----YPIKKGEDRISVLIPQLHRDKDAWGDNVVEEFQPE-RFE--ELDK | 389 |
| EEL05393.1 | AKEDTVI-GGK-----YPIKKGEDRISVLIPQLHRDKDAWGDNVVEEFQPE-RFE--ELDK | 403 |
| EEK94080.1 | AKEDTVI-GGK-----YPIKKGEDRISVLIPQLHRDKDAWGDNVVEEFQPE-RFE--ELDK | 392 |
| EEK99882.1 | AKEDTVI-GGK-----YPIKKGEDRISVLIPQLHRDKDAWGDNVVEEFQPE-RFE--ELDK | 392 |
| EEK55784.1 | AKEDTVI-GGK-----YPIKKGEDRISVLIPQLHRDKDAWGDNVVEEFQPE-RFE--ELDR | 397 |
| ADK05784.1 | AKEDTVI-GGK-----YPIKKGEDRISVLIPQLHRDKDAWGDNVVEEFQPE-RFE--ELDK | 389 |
| AAU17340.1 | AKEDTVI-GGK-----YPIKKGEDRISVLIPQLHRDKDAWGDNVVEEFQPE-RFE--ELDK | 389 |
| EEL64394.1 | AKEDTVI-GGK-----YPIKKGEDRISVLIPQLHRDKDAWGDNVVEEFQPE-RFE--ELDK | 389 |
| AEW56259.1 | AKEDTVI-GGK-----YPIKKGEDRISVLIPQLHRDKDAWGDNVVEEFQPE-RFE--ELDK | 389 |
| AFQ11690.1 | AKEDTVI-GGK-----YPIKKGEDRISVLIPQLHRDKDAWGDNVVEEFQPE-RFE--DLDK | 389 |
| EAL16831.1 | AKEDTVI-GGK-----YPIKKGEDRISVLIPQLHRDKDAWGDNVVEEFQPE-RFE--ELDK | 389 |
| ACK94296.1 | AKEDTVI-GGK-----YPIKKGEDRISVLIPQLHRDKDAWGDNVVEEFQPE-RFE--ELDK | 389 |
| EDZ58760.1 | AKEDTVI-GGK-----YPIKKGEDRISVLIPQLHRDKDAWGDNVVEEFQPE-RFE--ELDK | 389 |
| EJV84218.1 | AKEDTVI-GGK-----YPIKKGEDRISVLIPQLHRDKDAWGDNVVEEFQPE-RFE--ELDK | 389 |
| EJQ69212.1 | AKEDTVI-GGK-----YPIKKGEDRISVLIPQLHRDKDAWGDNVVEEFQPE-RFE--ELDK | 389 |
| EJQ80339.1 | AKEDTVI-GGK-----YPIKKGEDRISVLIPQLHRDKDAWGDNVVEEFQPE-RFE--EPDK | 389 |
| EJV81602.1 | AKENTVI-GGK-----YPIKKGEDRISVLIPQLHRDKDAWGDNVVEEFQPE-RFE--ELDK | 389 |
| EJQ95474.1 | AKEDTVI-GGK-----YPIKKGEDRISVLIPQLHRDKDAWGDNVVEEFQPE-RFE--ELDK | 389 |
| EEK44229.1 | AKEDTVI-GGK-----YPIKKGEDRISVLIPQLHRDKDAWGDNVVEEFQPE-RFE--ELDK | 397 |
| EEK88560.1 | AKEDTVI-GGK-----YPIKKGEDRISVLIPQLHRDKDAWGDNVVEEFQPE-RFE--ELDK | 389 |
| EJR07451.1 | AKEDTVI-GGK-----YPIKKGEDRISVLIPQLHRDKDAWGDNVVEEFQPE-RFE--ELDK | 389 |
| EJR16542.1 | AKEDTVI-GGK-----YPIKKGEDRISVLIPQLHRDKDAWGDNVVEEFQPE-RFE--ELDK | 389 |
| BAL18840.1 | AKEDTVI-GGK-----YPIKKGEDRISVLIPQLHRDKDAWGDNVVEEFQPE-RFE--ELDK | 389 |
| EDX69960.1 | AKEDTVI-GGK-----YPIKKGEDRISVLIPQLHRDKDAWGDNVVEEFQPE-RFE--ELDK | 389 |
| ACM13462.1 | AKEDTVI-GGK-----YPIKKGEDRISVLIPQLHRDKDAWGDNVVEEFQPE-RFE--ELDK | 389 |
| EEK75631.1 | AKEDTVI-GGK-----YPIKKGEDRISVLIPQLHRDKDAWGDNVVEEFQPE-RFE--ELDK | 389 |
| EEL25491.1 | AKEDTVI-GGK-----YPIKKGEDRISVLIPQLHRDKDAWGDNVVEEFQPE-RFE--ELDK | 330 |
| EEL21990.1 | AKEDTVI-GGK-----YPIKKGEDRISVLIPQLHRDKDAWGDNVVEEFQPE-RFE--EPDK | 397 |
| EEL33825.1 | AKEDTVI-GGK-----YPIKKGEDRISVLIPQLHRDKDAWGDNVVEEFQPE-RFE--EPDK | 397 |

|                        |                                                                 |     |
|------------------------|-----------------------------------------------------------------|-----|
| EEL44933.1             | AKEDTVI-GGK-----YPIKKGEDRISVLI PQLHRDKDAWGDNVEEFQPE-RFE--ELDR   | 397 |
| EEL50167.1             | AKEDTVI-GGK-----YPVKKREDRITVLI PQLHRDKDAWGDNAEEFHPE-RFE--DPDK   | 467 |
| EJR22930.1             | AKEDTVI-GGK-----YPIKKGEDRISVLI PQLHRDKVAWGDNVEEFQPE-RFE--ELDK   | 389 |
| EJP91231.1             | AKEDTVI-GGK-----YPIKKGEDRISVLI PQLHRDKDAWGDNVEEFQPE-RFE--ELDK   | 389 |
| EJR37623.1             | AKEDTVI-GGK-----YPIKKGEDRISVLI PQLHRDKDAWGDNVEEFQPE-RFE--ELDK   | 389 |
| EJR50635.1             | AKEDTVI-GGK-----YPIKKGEDRISVLI PQLHRDKDAWGDNVEEFQPE-RFE--ELDK   | 389 |
| EJR64551.1             | AKEDTVI-GGK-----YPIKKGEDRISVLI PQLHRDKDAWGDNVEEFQPE-RFE--EPDK   | 389 |
| EJR75620.1             | AKEDTVI-GGK-----YPIKKGKDRISVLI PQLHRDKDAWGDNVEEFQPE-RFE--EHDK   | 389 |
| EJR82049.1             | AKEDTVI-GGK-----YPIKKGEDRISVLI PQLHRDKDAWGDNVEEFQPE-RFE--ELDK   | 389 |
| EJR83659.1             | AKEDTVI-GGK-----YPIKKGEDRISVLI PQLHRDKDAWGDNVEEFQPE-RFE--ELDK   | 389 |
| EJR91135.1             | AKKDTTI-GGK-----YKIKK-GEAVTVII PKLHRDKKVWGQDAEQFRPE-RFE--DSSK   | 386 |
| EJR97241.1             | AKEDTVI-GGK-----YPIKKGEDRISVLI PQLHRDKDAWGDNVEEFQPE-RFE--ELDK   | 389 |
| EJS05852.1             | AKEDTVI-GGK-----YPIKKGEDRISVLI PQLHRDKDAWGDNVEEFQPE-RFE--ELDK   | 389 |
| EDX58768.1             | AKEDTVI-GGK-----YPIKKGEDRISVLI PQLHRDKDAWGDNVEEFQPE-RFE--ELDK   | 389 |
| AAU24352.1             | AKEETVI-GGK-----YLIPK-GQSVTVLIPKLHRDQSVWGEDAEAFRPE-RFE--QMDS    | 387 |
| ABY44122.1             | AKEDTVI-GGK-----YPIKKGEDRISVLI PQLHRDKDAWGDNVEEFQPE-RFE--ELDK   | 389 |
| EDW23201.1             | AKEDTVI-GGK-----YSIEK-NQSVSVLLPKLHRDQAVWGEDAEFEKPE-RFL--HPEK    | 386 |
| ABV62358.1             | AKEDTII-GGK-----YSIKK-NQSVSVLLPKLHRDQAVWGGDAEEFKPE-RFL--HPEK    | 386 |
| EIF12263.1             | AKEDTVI-GGK-----YPITP-KDRISVLI PQLHRDKDAWGDNAEEFYPE-RFE--HPDQ   | 386 |
| EIF14027.1             | AKEDTVL-GGK-----YPIAK-GQPVTILTPQLHRDKSAWGEDAESFRPE-RFS--DPAA    | 387 |
| EHL75405.1             | AKEDTVI-GGK-----YPIKKGEDRISVLI PQLHRDKDAWGDNVEEFQPE-RFE--ELDK   | 389 |
| EJD67577.1             | AKEDTVI-GGK-----YPITP-KDRISVLI PQLHRDKDAWGDNAEEFYPE-RFE--HPDQ   | 386 |
| EJD68347.1             | AKEDTVL-GGK-----YPIAK-GQPVTILTPQLHRDKSAWGEDAESFRPE-RFS--DPAA    | 387 |
| EFV73436.1             | AKEETVI-GGK-----YLIPK-GQSVTVLIPKLHRDQSVWGEDAEAFRPE-RFE--QMDS    | 401 |
| CBY93692.1             | AKEDTVI-GGK-----YPIKKGEDRISVLI PQLHRDKDAWGDNVEEFQPE-RFE--ELDK   | 389 |
| AFI27355.1             | PKEDTVI-GGK-----FPITT-KDRISVLI PQLHRDRDAWGKDAEEFRPE-RFE--HQDQ   | 387 |
| AFI29229.1             | AKEDTVL-GGE-----YPI SK-GQPVTILIPKLHRDQNAWGADAEDFRPE-RFE--DPSS   | 387 |
| EIL85422.1             | AKEDTVI-GGE-----FPIEK-NQSVTVLLPKLHRDQAVWGEDAEFEKPE-RFL--HPEK    | 386 |
| ADV93500.1             | AKEDTVL-GGE-----YPI SK-GQPVTVLI PKLHRDQNAWGPDAEDFRPE-RFE--DPSS  | 387 |
| ADV95715.1             | PKEDTVI-GGK-----FPITT-NDRISVLI PQLHRDRDAWGKDAEEFRPE-RFE--HQDQ   | 387 |
| BAI84248.1             | PKEDTVI-GGK-----FPITT-KDRISVLI PQLHRDRDAWGKDAEEFRPE-RFE--HQDQ   | 387 |
| EFG90288.1             | AKEDTVL-GGE-----YPI SK-GQPVTVLI PKLHRDQNAWGEDAEEDFRPE-RFE--DPSR | 387 |
| EFG91781.1             | PKEDTVI-GGK-----YMITT-QDRISVLI PQLHRDQDAWGEDAEEDFRPE-RFE--HQDQ  | 387 |
| AEP85668.1             | PKEDTVI-SGK-----YPITT-KDRISVLI PQLHRDQDAWGEDAEEDFRPE-RFE--HQDQ  | 387 |
| AEP87558.1             | AKEDTVL-GGE-----YPI SK-GQPVTVLI PKLHRDQNAWGEDAEAFRPE-RFE--DPSR  | 387 |
| sp 008336.1 CYPB_BACSU | AKEDTVL-GGE-----YPI SK-GQPVTVLI PKLHRDQNAWGPDAEDFRPE-RFE--DPSS  | 387 |
| sp 008394.1 CYPD_BACSU | PKEDTVI-GGK-----FPITT-NDRISVLI PQLHRDRDAWGKDAEEFRPE-RFE--HQDQ   | 387 |
| AEP89812.1             | PKEDTVI-GGK-----FPITT-KDRISVLI PQLHRDRDAWGKDAEEFRPE-RFE--HQDQ   | 387 |

|            |                                                               |     |
|------------|---------------------------------------------------------------|-----|
| AEP91702.1 | AKEDTVL-GGK-----YPIISK-GQPVTVLIPKLHRDQNAWGPDAEDFRPE-RFE--DPSS | 387 |
| EHA31094.1 | AKEDTVL-GGK-----YPIISK-GQPVTVLIPKLHRDQNAWGPDAEDFRPE-RFE--DPSS | 389 |
| ADH07708.1 | AKEDTVI-GGK-----YPIKKGEDRISVLIPQLHRDKDAWGDVNEEFQPE-RFE--ELDK  | 389 |
| EEM28177.1 | AKEDTVI-GGK-----YPIKKGEDRISVLIPQLHRDKDAWGDVNEEFQPE-RFE--ELDK  | 389 |
| AFQ14162.1 | AKEDTVI-GGK-----YPIKKGEDRISVLIPQLHRDKDAWGDVNEEFQPE-RFE--ELDK  | 389 |
| EEM95517.1 | AKEDTVI-GGK-----YPIKKGEDRISVLIPQLHRDKDAWRDNVEEFQPE-RFE--DPDK  | 389 |
| EEN02344.1 | AKEDTVI-GGK-----YPIKKGEDRISVLIPQLHRDKDAWGDVNEEFQPE-RFE--ELDK  | 389 |
| AFU13781.1 | AKEDTVI-GGK-----YPIKKGEDRISVLIPQLHRDKDAWGDVNEEFQPE-RFE--EPDK  | 397 |
| EEM70897.1 | AKEDTVI-GGK-----YPIKKGEDRISVLIPQLHRDKDAWGDVNEEFQPE-RFE--ELDR  | 397 |
| ADY22413.1 | AKEDTVI-GGK-----YPIKKGEDRISVLIPQLHRDKDAWGDVNEEFQPE-RFE--ELDK  | 389 |
| EEM82895.1 | AKEDTVI-GGK-----YPIKKGEDRISVLIPQLHRDKDAWGDVNEEFQPE-RFE--ELDK  | 389 |
| EEM52818.1 | AKEDTVI-GGK-----YPIKKGEDRISVLIPQLHRDKDAWGDVNEEFQPE-RFE--ELDK  | 389 |
| EEM59126.1 | AKEDTVI-GGK-----YPIKKGEDRISVLIPQLHRDKDAWGDVNEEFQPE-RFE--ELDK  | 397 |
| EEM47193.1 | AKEDTVI-GGK-----YPIKKGKDRISVLIPQLHRDKDAWGDVNEEFQPE-RFE--EHDK  | 330 |
| EEM76899.1 | AKEDTVI-GGK-----YPIKKGEDRISVLIPQLHRDKDAWGDVNEEFQPE-RFE--ELDR  | 397 |
| EEM88909.1 | AKEDTVI-GGK-----YPIKNGEDRISVLIPQLHRDKDAWGDVNEEFQPE-RFE--ELDK  | 397 |
| EEM38196.1 | AKEDTVI-GGK-----YPIKKGEDRISVLIPQLHRDKDAWGDVNEEFQPE-RFE--ELDK  | 389 |
| EEM21858.1 | AKEDTVI-GGK-----YPIKKGEDRISVLIPQLHRDKDAWGDVNEEFQPE-RFE--ELDK  | 392 |
| ABK86139.1 | AKEDTVI-GGK-----YPIKKGEDRISVLIPQLHRDKDAWGDVNEEFQPE-RFE--ELDK  | 397 |
| EJQ37805.1 | AKEDTVI-GGK-----YPIKKGEDRISVLIPQLHRDKDAWGDVNEEFQPE-RFE--EPDK  | 389 |
| CCF04242.1 | AKEDTVI-GGK-----YPITP-KDRISVLIPQLHREKDAWGDNAEEFYPE-RFE--HPDQ  | 386 |
| CCF05972.1 | AKEDTVL-GGK-----YPIAK-GQPVTILTPQLHRDKSAWGEDAELFRPE-RFS--DPAA  | 387 |
| ABS73124.1 | AKEDTVI-GGK-----YPITP-KDRISVLIPQLHRDKDAWGDNAEEFYPE-RFE--HPDR  | 386 |
| ABS74786.1 | AKEDTVL-GGK-----YPIAK-GQPVTILTPQLHRDKSAWGEDAELFRPE-RFS--DPAA  | 387 |
| EKE46398.1 | AKEDTVI-GGK-----YPITP-KDRISVLIPQLHRDKDAWGDNAEEFYPE-RFE--HPDL  | 386 |
| EKE48022.1 | AKEDTVL-GGK-----YPIAK-GQPVTILTPQLHRDKSAWGEDAELFRPE-RFS--DPAA  | 387 |
| CCG48683.1 | AKEDTVI-GGK-----YPITP-KDRISVLIPQLHRDKDAWGDNAEEFYPE-RFE--HPDQ  | 386 |
| AFJ60789.1 | AKEDTVI-GGK-----YPITP-KDRISVLIPQLHRDKDAWGDNAEEFYPE-RFE--HPDQ  | 393 |
| AFJ62808.1 | AKEDTVL-GGK-----YPIAK-GQPVTILTPQLHRDKSAWGEDAESFRPE-RFS--DPAA  | 387 |
| EEK66903.1 | AKEDTVI-GGK-----YPIKKGEDRISVLIPQLHRDKDAWGDVNEEFQPE-RFE--ELDK  | 403 |
| EJQ52935.1 | AKEDTVI-GGK-----YPIKKGEDRISVLIPQLHRDKDAWGDVNEEFQPE-RFE--ELDK  | 389 |
| EJS69574.1 | AKEDTVI-GGK-----YSIKKGEDRISVLIPQLHRDKDAWGDVNEEFQPE-RFE--ELDK  | 389 |
| EJV63294.1 | AKEDTVI-GGK-----YPIKKGEDRISVLIPQLHRDKDAWGDVNEEFQPE-RFE--ELDK  | 389 |
| EKF35778.1 | AKEDTVI-GGK-----YPIAK-NQSVSVLLPKLHRDQAVWGEDAEEFKPE-RFM--HPET  | 386 |
| EGP08506.1 | PLKDETI-GGK-----YKLLK-GTFVTVLVMALHRDPSVWGPNDVDFDPE-NFSREAEAK  | 396 |
| BAL78328.1 | PLKDEVIGGGK-----YRLRK-GTFITILVTALHRDPSVWGPNDAFDPE-NFSREAEAK   | 397 |
| BAC48147.1 | PLADETIGGGK-----YKLRK-GTFITILVTALHRDPSVWGPNDAFDPE-NFSREAEAK   | 397 |
| BAL12135.1 | PLNDETIGGGN-----YRLRK-GTFITILVTALHRDPSVWGPNDAFNPE-NFSREAEAK   | 397 |

CCE00185.1 PLQDETI-GGK-----YKLKK-NTFVTILVTALHRDPKVGPNPDAFDPE-NFSPEAEAK 400  
EIG57609.1 PLNDETIGGGK-----YKLRK-GTFTTILVTALHRDPSVWGNPDAFDPE-NFSREAEAK 397  
EHR02046.1 PLNDETIGGGM-----YKLRK-GTFTTILVTALHRDPSVWGNPDAFDPE-NFSREAEAK 397  
EJN11211.1 PLADETIGSGK-----YKLRK-GTFITILVTALHRDPSVWGNPDAFDPE-NFSREAEAK 397  
CCF15606.1 AKEDTLL-DGK-----YPLKK-GESINVLIPTLHRDTSVWGDNVVEEFRPE-RFE--DPSQ 329  
CCF12687.1 ARADTII-GGK-----YAIKK-GEVVALLLPQLHRDKDAWGDDADEFCE-RFE--DPDK 387  
ABB05850.1 PLADTTF-GGK-----YAVSP-DDIIMILTPMLHRDVS VWGEDVEAFRPE-RFAPENAEQ 391  
EHP43606.1 PFEDTVI-GGR-----YLIRK-DRRVS VLTALHRDPKVW-ADPETFDID-RFLPENEAE 418  
ABF10339.1 PFDDVVL-GGR-----YRLRK-DRRIS VLTALHRDPKVW-ANPERFDID-RFLPENEAK 394  
CAJ95800.1 PFEDTLL-GGR-----YLIRK-DRRLS VLTALHRDPKVW-ADPERFDID-RFLPEQEAK 420  
AEI79937.1 PFEDTLL-GGR-----YLIRK-DRRLS VLTALHRDPKVW-ADPERFDID-RFLPEQEAK 420  
AFD27790.1 PRARTII-GGR-----YEVYT-DDTLLVLLPALHRDLAVWGPDVDRFDPE-RFAPGALEA 389  
ABC62112.1 PFEDEVL-GGK-----YAIK-GTFTTVLIPSLHRDKLVWGENPEAFNPD-NFSPKAEAA 394  
EAQ27850.1 PFEDEVL-GGK-----YLIPK-GTFTTVLIPSLHRDKSVWGENPEVFDPE-NFTAEEAAA 394  
EIT84377.1 AKEDTVV-GGK-----YEIKK-GERVVLLPRLHRDKAEAWGEDADRFRPE-RFL--DYKS 386  
CCG43686.1 AKENTTL-AGQ-----YEVEK-GETFTLLLPQLHRDTSIWGEDAEAFKPE-RFE--DPSQ 387  
ABX05160.1 AKHDTNI--GG-----FPIKQ-GEKFIALLP LHRDPKVWL-NPNQFDPD-RFAPEVREQ 391  
BAJ96920.1 SEEDTVL-GGK-----YQIKK-SDDVVVFIAGLHRDPTVWGNVVEEFDPD-RFSPEKMG 387  
GAB96874.1 SLEPTTI-GGRDGGPSYAI EP-QDTVLVLT PSLHRDPAVWA-DPERFDPQ-RFSFERAQQ 433  
EFH80345.1 PYEETVV-GDK-----YRMDK-DSEWAILIPMLHRDKSVWGEDADEFNPD-HFSHEAEAS 397  
EFH88481.1 PYEERPL-AGK-----YQLQP-SDTITVLT PMLHRDRSIWGDDAEIFNPDHFFNPEAEKQ 391  
EAW32450.1 PLEDTTL-AGV-----YPLKA-GQPILILIGGLHRDEKAWGDNPD LFDPD-RFAPDVAAL 391  
EIZ82104.1 PKAPTVI-GGR-----YPVTP-ADTLLILAPILHRDPAVWD-DPEAFRPE-RFAPEAAER 389  
AEV70722.1 ALD TVI-GGK-----YPVRA-GEAVTVLTGALHRQP-GWGDNV EFDPD-RFDAARSAA 384  
EFC41452.1 CKTDQVI-GGK-----YRIHP-SDFIIVS NSNLHRDKK V WGEDCEQFNPD-RMSPENFSS 417  
ACV78954.1 PRRATTI-GGG-----YHLDA-GATILIP LPKVHIDPAIWGPDAEVFRPR-RWE--SVGQ 389  
ACV78964.1 PFEDTLL-GGK-----YAIPA-GTAMSVVIPSLHRDRSVWGDSADEFDPD-HFSAERKAA 394  
ACV81379.1 ARTD TVI-GGK-----YLAPK-DVGISVLLPMLHRDPSVWGPDAEDFNPH-HFDPERFAA 394  
EIZ78677.1 PHEPTTL-AGR-----YRVTP-EDTLMVLI PNLHRDPQVWD-DPDAFRPE-RFAPGNAEQ 387  
EJW15291.1 VKQDTLL-VDR-----YVMKQ-GDRLLLLLPQLHRDPAAWGSDAHEFRPE-RFE--DPSR 386  
EJW16173.1 AKEDTLL-AGK-----YPLAK-GESVNVLPRLHRDSAVWGEDAEQFRPE-RFE--DPSQ 389  
EHQ58913.1 AKRDTV L-AGK-----YAVNQ-GDRMVVLI PQLHRDVS AWGEDAKVFRPE-RFE--DPSR 386  
EHQ59900.1 AKEDTLL-AGK-----YPLKK-GDSVNVLI PKLHRDTSVWGDNVDEFCE-RFE--DPSR 387  
EHB66924.1 AKEDTTI-GGT-----YSVKQ-GDSVTVLI PGLHRDRSVWGDDVEAFRPE-RFE--DPSK 386  
AFH60445.1 AKEDTML-GGR-----YPMQK-GDSVSVLI PKLHRDPSVWGDDVESFIPE-RFE--DPSS 387  
AEI42011.1 AKEDTML-GGR-----YPMKK-GDSVSVLI PKLHRDPSVWGDDVESFIPE-RFE--DPSS 387  
ADO57681.1 AKEDTLL-DGT-----YPLKK-GDSVNVLI PKLHRDTEAWGEDVEEFRPE-RFE--DPSA 387  
EGG32133.1 AKEDTAI-GGT-----YPIKK-GDSVTVLI PGLHRDRSVWGDDAETFRPE-RFE--DPSQ 387

|            |                                                                |     |
|------------|----------------------------------------------------------------|-----|
| EGL17662.1 | AKEDTLL-ADK-----YPLQK-GDSLTVLIPKLHRDKTVWGDDVESFIPE-RFE--DPGK   | 388 |
| ACX65034.1 | AKEDTAI-GGT-----YPMKK-GDSVTVLIPALHRDSRVWGDDAETFRPE-RFE--DPSR   | 387 |
| ACT11327.1 | PTQDTIL-AGK-----YPLTP-KDSIVILQPQLHRDVKAWGDDANLFKPE-RFGPDNAEN   | 390 |
| AEA28016.1 | PYEDVVL-GG-----YRIAK-GSSLTALTPMLHRLPEVWGPDAEEFNPD-HFRAEFRAT    | 398 |
| EFP68091.1 | PYEDTRI-GGR-----YAIRK-DQRVVTVLLALHRDPAVW-DRPEVFDID-RFLPENEAK   | 404 |
| EGY61507.1 | PYEDTRI-GGR-----YAIRK-DQRVVTVLLALHRDPAVW-DRPEVFDID-RFLPENEAK   | 404 |
| EIE85788.1 | CKKDCIL-PGG-----YKIKK-GTPCTVQVYAMHHNKDVY-PDPERFDPD-RWIPEEEQK   | 475 |
| EIE92534.1 | CKNDCIL-PGG-----YKIKG-NTPCSIQVYAMHHNKDVY-PDPERFDPD-RWTPEEEQK   | 475 |
| BAE46296.1 | VRTDTTL-GGR-----YDMPK-GSWVFLVLLPQLHRDP-VWGEDPESFDPD-RFKPENVKK  | 443 |
| BAH31604.1 | ALEDTTL-VGK-----YPMKK-GDWMLVLIPLSLHRDP-VWGNPEAFDPD-RFLPANIKA   | 399 |
| EEN84644.1 | ALEDTTL-VGK-----YPMKK-GDWMLVLIPLSLHRDP-VWGNPEAFDPD-RFLPANIKA   | 399 |
| EEN88978.1 | VRTDTTL-GGR-----YAMPK-GSWVFLVLLPQLHRDP-VWGEDPDSFDPD-RFKPENVKK  | 483 |
| ABG96413.1 | ATVDTTL-VGK-----YPMKV-GDWVFLVLIPLALHRDP-VWGDDPEAFDPD-HFLPERIRS | 431 |
| BAH52971.1 | ATVDTTL-VGK-----YPMKV-GDWVFLVLIPLALHRDP-VWGENPEEFDPD-HFLPERNRS | 398 |
| EHI44575.1 | ATVDTTL-VGK-----YPMKV-GDWVFLVLIPLALHRDP-VWGDDPEAFDPD-HFLPERIRS | 433 |
| EID73168.1 | ATVDTTL-VGK-----YPMKV-GDWVFLVLIPLALHRDP-VWGDDPEAFDPD-HFLPERIRS | 398 |
| EHK83749.1 | VRGETTL-GGR-----TLPK-GSWVFLVLLPQLHRDP-LWGDDPERFDPD-RFEPAAVRK   | 374 |
| EJI96173.1 | ATVDTTL-VGK-----YPMKV-GDWVFLVLIPLALHRDP-VWGDDPEVFDPD-HFLPERIRS | 398 |
| ABI79384.1 | ARQATTTL-DG-----YPIRK-GETILVLLALHRDPALWGEDPERFDPD-RFLPAAVRA    | 427 |
| CAR47816.1 | ARQETTL-AG-----YPIRK-SETILVLLALHRDPQLWGDDVERFDPD-RFLPPAVRA     | 429 |
| AEK26937.1 | VRGETTL-GGR-----TLPK-GSWVFLVLLPQLHRDP-LWGDDPERFDPD-RFEPAAVRK   | 406 |
| ABE39056.1 | PIKDEVI-GGK-----YHLKR-GTFVTVLVLALHRDPAIWGNPDADFPE-NFSREAESK    | 396 |
| ABD08340.1 | PIQDETI-GGQ-----YHLKR-GTFVTVLVLALHRDPSIWGNPDADFPE-NFSREAESK    | 395 |
| CAM03474.1 | ARHDTVLL-GGR-----IPMRA-GEAAVLIPLMLHRSP-VRGDNPELFDPA-RFAPEAEAA  | 388 |
| EJF54063.1 | SFKKEQV-G-E-----YLIKP-TDSIFIFLPSLHRAP-IWGDDPKQFNPE-NFSPENEAK   | 402 |
| AFC23737.1 | SFKKEQV-G-E-----YLIKP-TDSIFIFLPSLHRAP-IWGDDPKLFNPE-NFSPENEAK   | 390 |
| ADG98903.1 | ARKDTTV-GGH-----AFKQ-KDWVFLVLLIGAHDRPASWGADADRFPD-RFSPENIRS    | 402 |
| EGI54680.1 | PREATTI-GGR-----YAVTP-DDTLLILTLPVLRDPTVWD-EPEAFRPE-RFAPEVAAK   | 386 |
| AEW97204.1 | AVTDTVLL-DGR-----VPMRA-GDTALVLTLPVLRDPTVWD-EPEAFRPE-RFSPEREAA  | 407 |
| CAJ88567.1 | ARTDTVLL-GGS-----YPMRR-GAWALVLAGMLHRDPQVWGPDAEEFDPD-RFDAKAVRS  | 417 |
| BAC68285.1 | PLEDTVLL-GGC-----YGLKK-GARVNIPLGLHHPKAW-ERPEEFDIN-RWLPENRVN    | 395 |
| BAC75137.1 | ARRDTVLL-GGV-----HPMRE-GAWALVLTAMLHRDPGVWGAERFDPD-RFDAQAVRS    | 410 |
| EDY51256.1 | PLEDTVLL-GGR-----YPVHK-GQPLTVLTPVLRDPTVWD-EPEAFRPE-RFDPQADS    | 380 |
| EFG07822.1 | PLEDTVLL-GGR-----YPVHK-GQPLTVLTPVLRDPTVWD-EPEAFRPE-RFDPQADS    | 412 |
| EHN78335.1 | AREDTVLL-GGA-----YPMRP-GAWALVLTGMLHRDPEVWGPDAERFDPD-RFDAKAVRA  | 420 |
| CAB66201.1 | AREDTVLL-GGT-----HPMRR-GAWALVLTGMLHRDPEVWGAERFDPD-RFDAKAVRS    | 424 |
| EGG48117.1 | AREDTVLL-AGE-----HPMRR-GAWTVLTPVLRDPEVWGPDAERFDPD-RFEAAAVRA    | 424 |
| EFL20831.1 | PLEDTVLL-GGK-----YAVRK-GESLLVLIPLQVLRDPTVWD-EPEAFRPE-RFRPEREEA | 402 |

|            |                                                                 |     |
|------------|-----------------------------------------------------------------|-----|
| EFL28515.1 | AREDTML-GGR-----VPMRA-GQPAIVLTPMLHRAA-VWGDNPELFDPS-RFDPEAEAAA   | 396 |
| AEY93311.1 | ARRDTVL-AGD-----HPMRR-GAWTLVLTPLMHRPEVWGEDAERFDPD-RFTPAAVRA     | 414 |
| AEY93321.1 | AREDTLL-GGR-----IPLRA-GQAVTVLAPMLHRQP-VWGDNPELFDPE-RFTPEAEAAA   | 394 |
| EFD71156.1 | AREDTVL-GGT-----HPMRR-GAWALVLTGMLHRDPEVWGADAERFDPD-RFDAKAVRS    | 426 |
| CBG67789.1 | PLEDTVI-GGR-----YAVRE-GETIQVLI PQLHRDP-AWGENVELFDPD-RFLPEREQE   | 397 |
| CBG68112.1 | AREDTVL-GGV-----HPMRR-GAWALVLTSMMLHRDPEVWGADAERFDPD-RFDAAAVRG   | 415 |
| EFL10082.1 | AREDLVL-GGK-----YPMRK-GDSVIVPLPMLHRDPAVWGPDPPEKFDPD-RFEPAAVRK   | 426 |
| EFF88741.1 | PLADTVI-GGR-----YPVRR-GQPVMVLNLALHRDP-AWGENVELFDPE-RFTREREEA    | 396 |
| EDY58112.1 | AVEDTVL-AGQ-----HPMRR-GAWTLVLTPLMQRDPEVWGADAERFDPD-RFDPKAVRS    | 407 |
| EFL36674.1 | AREDTVL-AGE-----HPMRR-GAWALVLTPLMHRDPEVWGADAERFDPD-RFDARAVRS    | 424 |
| EFL36680.1 | AREDTLL-GGR-----IPLRA-GQAALVLTPLMHRQP-VWGDNPELFDPS-RFTAEEAEAE   | 444 |
| EFE65335.1 | AVRDTVL-AGE-----HPMRR-GAWTLVLTPLMHRDPEVWGADAERFDPD-RFDARAVRS    | 412 |
| EGX54696.1 | AREDTVL-GGV-----HPMRR-GAWALVLTAMTHRDPRVWGPDAERFDPD-RFDPRAVRG    | 409 |
| ACZ89135.1 | AKHDTV L-AGR-----YPLKK-GDVL FVLT PSLHRDPSVWD-DPERFDPA-RFAPGAREN | 392 |
| ABD83817.1 | PLKDETIAGGK-----YSLKK-NTFISILVTALHHDPAVWGPNDLFDPE-NFSPEAEAK     | 397 |
| ADU39615.1 | AKEDTTI-GGQ-----YTIKK-NNMVIMHALALHRDKAIWGENADQFNPD-NFSREAERE    | 395 |
| EJL72014.1 | AKEDTKI-GGL-----YTIKK-NNMVIMHALALHRDKGIWGEDADQFNPD-HFSREAERE    | 395 |

. : \* .

|                        |                                                               |     |
|------------------------|---------------------------------------------------------------|-----|
| sp P14779.2 CPXB_PRIM2 | IPQHAFKPFNGQRACIGQQFALHEATLVLGMMLKHFDDED-HTNYELDIKETLTLKPEG   | 444 |
| ADF40088.1             | IPQHAFKPFNGQRACIGQQFALHEATLVLGMMLKHFDDED-HTNYELDIKETLTLKPEG   | 444 |
| ADE70259.1             | IPQHAFKPFNGQRACIGQQFALHEATLVLGMMLKHFDDED-HTNYELDIKETLTLKPEG   | 444 |
| AEN88827.1             | IPQHAFKPFNGQRACIGQQFALHEATLVLGMMLKHFDDED-HTNYELDIKETLTLKPEG   | 444 |
| KFN05180.1             | IPQHAFKPFNGQRACIGQQFALHEATLVLGMMLKHFDDED-HTNYELDIKETLTLKPEG   | 444 |
| ACZ37122.1             | IPQHAFKPFNGQRACIGQQFALHEATLVLGMMLKHFDDED-HTNYELDIKETLTLKPEG   | 444 |
| ADA57055.1             | IPQHAFKPFNGQRACIGQQFALHEATLVLGMMLKHFDDED-HTNYELDIKETLTLKPEG   | 444 |
| ADA57058.1             | IPQHAFKPFNGQRACIGQQFALHEATLVLGMMLKHFDDED-HTNYELDIKETLTLKPEG   | 444 |
| ADA57059.1             | IPQHAFKPFNGQRACIGQQFALHEATLVLGMMLKHFDDED-HTNYELDIKETLTLKPEG   | 444 |
| ADA57061.1             | IPQHAFKPFNGQRACIGQQFALHEATLVLGMMLKHFDDED-HTNYELDIKETLTLKPEG   | 444 |
| ADA57062.1             | IPQHAFKPFNGQRACIGQQFALHEATLVLGMMLKHFDDED-HTNYELDIKETLTLKPEG   | 444 |
| ADA57068.1             | IPQHAFKPFNGQRACIGQQFALHEATLVLGMMLKHFDDED-HTNYELDIKETLTLKPEG   | 444 |
| AAT62301.1             | VPHHAYKPFNGQRACIGMQFALHEATLVMGMLLQHFEEFID-YEDYQLDVKQTLTLKPGD  | 448 |
| AAM54108.1             | IPACAWMPFGHGARACIGRPFALQEATLVLALVLRFDLALADPDHRLTIKQTLTLKPDS   | 452 |
| EFQ83738.1             | RPAHTYKPFGTGERACIGRFALHESILVLRLLHRYDLSDG-DPGYVLDVSRERTIMPEG   | 454 |
| EFL88452.1             | RPFNAYKPFNGQRACIGRFAMQEANLVIGMILQRFQLDD-HKNYQLKIKESLSIKPDG    | 452 |
| BAF89518.1             | HHPHAYHPFGMGARSCIGFQFALVEAKMVLARFIQRFTARPKDPHYVLCHKQALTVKPDH  | 546 |
| CBI43648.1             | IPADAYKPFNGQRACIGMQFALQEATMVLGLVLKHFELID-HTDYELTIKEALTIKPGD   | 446 |
| AEB22839.1             | VPHHAYKPFNGQRACIGMQFALHEATLVLGMMLLQHFEEFID-HTDYELDIKQTLTLKPNP | 446 |
| EDT22025.1             | VPHHAYKPFNGQRACIGMQFALHEATLVMGMLLQHFEEFID-YEEYQLDVKQTLTLKPGD  | 448 |
| AFH84458.1             | VPHHAYKPFNGQRACIGMQFALHEATLVMGMLLQHFEEFID-YEEYQLDVKQTLTLKPGD  | 456 |
| ADP31197.1             | VPHHAYKPFNGQRACIGMQFALHEATLVLGMMLLQYFKLID-HTNYELDIKQTLTLKPGD  | 446 |
| ACP19384.1             | VPHHAYKPFNGQRACIGMQFALHEATLVMGMLLQHFELID-YQNYQLDVKQTLTLKPGD   | 448 |
| ADL27534.1             | VPHHAYKPFNGQRACIGMQFALHEATLVMGMLLQHFELID-YQNYQLDVKQTLTLKPGD   | 448 |
| ACO29732.1             | VPHHAYKPFNGQRACIGMQFALHEATLVMGMLLQHFEEFID-YEDYQLDVKQTLTLKPGD  | 448 |
| EDX65100.1             | VPHHAYKPFNGQRACIGMQFALHEARLVMGMLLQHFEEFID-YEDYQLDVKQTLTLKPGD  | 448 |
| EEK61456.1             | VPHHAYKPFNGQRACIGMQFALHEATLVMGMLLQHFELID-YQNYQLDVKQTLTLKPGD   | 448 |
| EEL16232.1             | VPHHAYKPFNGQRACIGMQFALHEATLVMGMLLQHFEEFID-YEDYQLDVKQTLTLKPGD  | 456 |
| EDZ53094.1             | VPHHAYKPFNGQRACIGMQFALHEATLVMGMLLQHFELID-YQNYQLDVKQTLTLKPGD   | 448 |
| EEL81346.1             | VPHHAYKPFNGQRACIGMQFALHEATLVMGMLLQHFEEFID-YQDYQLDVKQTLTLKPGD  | 462 |
| EEL87105.1             | VPHHAYKPFNGQRACIGMQFALHEATLVMGMLLQHFELID-YQDYQLDVKQTLTLKPGD   | 462 |
| EEL75761.1             | VPHHAYKPFNGQRACIGMQFALHEATLVMGMLLQHFELID-YQNYQLDVKQTLTLKPGD   | 389 |
| ACK88541.1             | VPHHAYKPFNGQRACIGMQFALHEATLVMGMLLQHFEEFID-YEDYQLDVKQTLTLKPGD  | 448 |
| EJQ05303.1             | VPHHAYKPFNGQRACIGMQFALHEATLVMGMLLQHFEEFID-YEDYQLDVKQTLTLKPGD  | 448 |
| EEK50040.1             | VPNHAYKPFNGQRACIGMQFALHEATLVMGMLLQHFELID-YQNYQLEVKQTLTLKPGD   | 448 |
| AAS42149.1             | VPHHAYKPFNGQRACIGMQFALHEATLVMGMLLQHFEEFID-YEDYQLDVKQTLTLKPGD  | 448 |
| AAP10153.1             | VPHHAYKPFNGQRACIGMQFALHEATLVMGMLLQHFELID-YQNYQLDVKQTLTLKPGD   | 448 |
| EEK83466.1             | VPHHAYKPFNGQRACIGMQFALHEATLVMGMLLQHFEEFID-YEDYQLDVKQTLTLKPGD  | 456 |

|            |                                                             |     |
|------------|-------------------------------------------------------------|-----|
| ACK63698.1 | VPHHAYKPFNGQRACIGMQFALHEATLVMGMLLQHFELID-YQNYQLDVKQTLTLKPGD | 389 |
| EJS57156.1 | VPHHAYKPFNGQRACIGMQFALHEATLVMGMLLQHFELID-YQNYQLDVKQTLTLKPGD | 448 |
| EJS56605.1 | VPHHAYKPFNGQRACIGMQFALHEATLVMGMLLQHFELID-YQDYQLDVKQTLTLKPGD | 448 |
| EJS68951.1 | VPHHAYKPFNGQRACIGMQFALHEATLVLGMLLQHFELID-YANYELDIKQTLTLKPGD | 447 |
| EJQ10567.1 | VPHHAYKPFNGQRACIGMQFALHEATLVMGMLLQHFELID-YQNYQLDVKQTLTLKPGD | 448 |
| EJQ13433.1 | VPHHAYKPFNGQRACIGMQFALHEATLVMGMLLQHFELID-YKDYQLDVKQTLTLKPGD | 448 |
| EJQ20399.1 | VPHHAYKPFNGQRACIGMQFALHEATLVMGMLLQHFELID-YQNYQLDVKQTLTLKPGD | 448 |
| EJQ30236.1 | VPHHAYKPFNGQRACIGMQFALHEATLVMGMLLQHFELID-YQNYQLDVKQTLTLKPGD | 448 |
| EJQ51278.1 | VPHHAYKPFNGQRACIGMQFALHEATVVLGMLLQHFELID-YANYELDIKQTLTLKPGD | 447 |
| EEL10858.1 | VPHHAYKPFNGQRACIGMQFALHEATLVMGMLLQHFELID-YQNYQLDVKQTLTLKPGD | 448 |
| EEL05393.1 | IPHHAYKPFNGQRACIGMQFALHEATLVMGMLLQHFELID-YQDYQLDVKQTLTLKPGD | 462 |
| EEK94080.1 | VPHHAYKPFNGQRACIGMQFALHEATLVMGMLLQHFELID-YQNYQLDVKQTLTLKPGD | 451 |
| EEK99882.1 | VPHHAYKPFNGQRACIGMQFALHEATLVMGMLLQHFELID-YEDYQLDVKQTLTLKPGD | 451 |
| EEK55784.1 | VPHHAYKPFNGQRACIGMQFALHEATLVMGMLLQHFELID-YEDYQLDVKQTLTLKPGD | 456 |
| ADK05784.1 | VPHHAYKPFNGQRACIGMQFALHEATLVMGMLLQHFELID-YEDYQLDVKQTLTLKPGD | 448 |
| AAU17340.1 | VPHHAYKPFNGQRACIGMQFALHEATLVMGMLLQHFELID-YEDYQLGVKQTLTLKPGD | 448 |
| EEL64394.1 | VPHHAYKPFNGQRACIGMQFALHEATLVMGMLLQHFELID-YQNYQLDVKQTLTLKPGD | 448 |
| AEW56259.1 | VPHHAYKPFNGQRACIGMQFALHEATLVMGMLLQHFELID-YEDYQLDVKQTLTLKPGD | 448 |
| AFQ11690.1 | VPHHAYKPFNGQRACIGMQFALHEATLVMGMLLQHFELID-YEDYQLDVKQTLTLKPGD | 448 |
| EAL16831.1 | VPHHAYKPFNGQRACIGMQFALHEATLVMGMLLQHFELID-YEDYQLDVKQTLTLKPGD | 448 |
| ACK94296.1 | VPHHAYKPFNGQRACIGMQFALHEATLVMGMLLQHFELID-YQNYQLDVKQTLTLKPGD | 448 |
| EDZ58760.1 | VPHHAYKPFNGQRACIGMQFALHEATLVMGMLLQHFELID-YEDYQLDVKQTLTLKPGD | 448 |
| EJV84218.1 | VPHHAYKPFNGQRACIGMQFALHEATLVMGMLLQHFELID-YQDYQLDVKQTLTLKPGD | 448 |
| EJQ69212.1 | IPHHAYKPFNGQRACIGMQFALHEATLVMGMLLQHFELID-YQDYQLDVKQTLTLKPGD | 448 |
| EJQ80339.1 | VPHHAYKPFNGQRACIGMQFALHEATLVMGMLLQHFELID-YQDYQLDVKQTLTLKPGD | 448 |
| EJV81602.1 | VPHHAYKPFNGQRACIGMQFALHEATLVMGMLLQHFELID-YQNYQLDVKQTLTLKPGD | 448 |
| EJQ95474.1 | VPHHAYKPFNGQRACIGMQFALHEATLVMGMLLQHFELID-YEDYQLDVKQTLTLKPGD | 448 |
| EEK44229.1 | VPHHAYKPFNGQRACIGMQFALHEATLVMGMLLQHFELID-YEDYQLDVKQTLTLKPGD | 456 |
| EEK88560.1 | VPHHAYKPFNGQRACIGMQFALHEATLVMGMLLQHFELID-YQNYQLDVKQTLTLKPGD | 448 |
| EJR07451.1 | VPHHAYKPFNGQRACIGMQFALHEATLVMGMLLQHFELID-YQNYQLDVKQTLTLKPGD | 448 |
| EJR16542.1 | VPHHAYKPFNGQRACIGMQFALHEATLVMGMLLQHFELID-YEDYQLDVKQTLTLKPGD | 448 |
| BAL18840.1 | VPHHAYKPFNGQRACIGMQFALHEATLVMGMLLQHFELID-YEDYQLDVKQTLTLKPGD | 448 |
| EDX69960.1 | VPHHAYKPFNGQRACIGMQFALHEATLVMGMLLQHFELID-YEDYQLDVKQTLTLKPGD | 448 |
| ACM13462.1 | VPHHAYKPFNGQRACIGMQFALHEATLVMGMLLQHFELID-YEDYQLDVKQTLTLKPGD | 448 |
| EEK75631.1 | VPHHAYKPFNGQRACIGMQFALHEATLVMGMLLQHFELID-YQDYQLDVKQTLTLKPGD | 448 |
| EEL25491.1 | VPHHAYKPFNGQRACIGMQFALHEATLVMGMLLQHFELID-YQNYQLDVKQTLTLKPGD | 389 |
| EEL21990.1 | VPHHAYKPFNGQRACIGMQFALHEATLVMGMLLQHFELID-YQNYQLDVKQTLTLKPGD | 456 |
| EEL33825.1 | VPHHAYKPFNGQRACIGMQFALHEATLVMGMLLQHFELID-YQNYQLDVKQTLTLKPGD | 456 |

|                        |                                                               |     |
|------------------------|---------------------------------------------------------------|-----|
| EEL44933.1             | VPHHAYKPFNGQRACIGMQFALHEATLVMGMLLQHFEFID-YEDYQLDVKQTLTLKPGD   | 456 |
| EEL50167.1             | VPHHAYKPFNGQRACIGMQFALHEATLVLGMLLQHFEFID-YANYELDIKQTLTLKPGD   | 526 |
| EJR22930.1             | VPHHAYKPFNGQRACIGMQFALHEATLVMGMLLQHFELID-YQNYQLDVKQTLTLKPGD   | 448 |
| EJP91231.1             | VPHHAYKPFNGQRACIGMQFALHEATLVMGMLLQHFELID-YQNYQLDVKQTLTLKPGD   | 448 |
| EJR37623.1             | VPHHAYKPFNGQRACIGMQFALHEATLVMGMLLQHFELID-YQNYQLDVKQTLTLKPGD   | 448 |
| EJR50635.1             | VPHHAYKPFNGQRACIGMQFALHEATLVMGMLLQHFEFID-YEDYQLDVKQTLTLKPGD   | 448 |
| EJR64551.1             | VPHHAYKPFNGQRACIGMQFALHEATLVMGMLLQHFELID-YQNYQLDVKQTLTLKPGD   | 448 |
| EJR75620.1             | VPHHAYKPFNGQRACIGMQFALHEATLVMGMLLQHFELID-YQNYQLDVKQTLTLKPGD   | 448 |
| EJR82049.1             | VPHHAYKPFNGQRACIGMQFALHEATLVMGMLLQHFELID-YQNYQLEVKQTLTLKPGD   | 448 |
| EJR83659.1             | VPHHAYKPFNGQRACIGMQFALHEATLVMGMLLQHFELID-YQNYQLDVKQTLTLKPGD   | 448 |
| EJR91135.1             | VPNYAYKPFNGKRACIGMQFALHEATLVLGMILQHFELID-YMNYQLKVTQTMTLKPED   | 445 |
| EJR97241.1             | VPHHAYKPFNGRRACIGMQFALHEATLVMGMLLQHFELID-YQNYQLDVKQTLTLKPGD   | 448 |
| EJS05852.1             | IPHHAYKPFNGQRACIGMQFALHEATLVMGMLLQHFEFID-YQDYQLDVKQTLTLKPGD   | 448 |
| EDX58768.1             | VPHHAYKPFNGQRACIGMQFALHEATLVMGMLLQHFEFID-YEEYQLDVKQTLTLKPGD   | 448 |
| AAU24352.1             | IPAHAYKPFNGQRACIGMQFALHEATLVLGMILQYFDLED-HANYQLKIKESLTLKPDG   | 446 |
| ABY44122.1             | IPHHAYKPFNGQRACIGMQFALHEATLVMGMLLQHFEFID-YQDYQLDVKQTLTLKPGD   | 448 |
| EDW23201.1             | IPQHAYKPFNGQRACIGMQFALHEATMVLAMVHLNLELID-HTSYELDLKESLTIKPN    | 445 |
| ABV62358.1             | IPQHAYKPFNGQRACIGMQFALHEATMVLAMVHLNMELID-HTSYELNLKESLTIKPN    | 445 |
| EIF12263.1             | VPHHAYKPFNGQRACIGMQFALHEATLVLGMILQHFETFDID-HTDYELDIKQTLTIKPGD | 445 |
| EIF14027.1             | IPADAYKPFNGQRACIGMQFALQEATMVLGLVLLKHFELID-HTDYELTIKEALTIKPGD  | 446 |
| EHL75405.1             | VPHHAYKPFNGQRACIGMQFALHEATLVMGMLLQHFELID-YQNYQLDVKQTLTLKPGD   | 448 |
| EJD67577.1             | VPHHAYKPFNGQRACIGMQFALHEATLVLGMILQHFETFDID-HTDYELDIKQTLTIKPGD | 445 |
| EJD68347.1             | IPADAYKPFNGQRACIGMQFALQEATMVLGLVLLKHFELID-HTDYELTIKEALTIKPGD  | 446 |
| EFV73436.1             | IPAHAYKPFNGQRACIGMQFALHEATLVLGMILQYFDLED-HANYQLKIKESLTLKPDG   | 460 |
| CBY93692.1             | VPHHAYKPFNGQRACIGMQFALHEATLVMGMLLQHFEFID-YEDYKLDVKQTLTLKPGD   | 448 |
| AFI27355.1             | VPHHAYKPFNGQRACIGMQFALHEATLVLGMILKYFTLID-HENYELDIKQTLTLKPGD   | 446 |
| AFI29229.1             | IPHHAYKPFNGQRACIGMQFALQEATMVLGLVLLKHFDMLN-HTGYKLIKKEALTIKPD   | 446 |
| EIL85422.1             | IPQHAYKPFNGQRACIGMQFALHEATMVLGMVHLNLELID-HTSYELDLKESLTIKPN    | 445 |
| ADV93500.1             | IPHHAYKPFNGQRACIGMQFALQEATMVLGLVLLKHFELIN-HTGYELKIKKEALTIKPD  | 446 |
| ADV95715.1             | VPHHAYKPFNGQRACIGMQFALHEATLVLGMILKYFTLID-HENYELDIKQTLTLKPGD   | 446 |
| BAI84248.1             | VPHHAYKPFNGQRACIGMQFALHEATLVLGMILKYFTLID-HENYELDIKQTLTLKPGD   | 446 |
| EFG90288.1             | IPHHAYKPFNGQRACIGMQFALQEATMVLGLVLLKHFDMVN-HTGYELKIKKEALTIKPD  | 446 |
| EFG91781.1             | VPHHAYKPFNGQRACIGMQFALHEATLVLGMVLYFTLID-HENYELDIKQTLTLKPGD    | 446 |
| AEP85668.1             | VPHHAYKPFNGQRACIGMQFALHEATLVLGMVLYFTLID-HENYELDIKQTLTLKPGD    | 446 |
| AEP87558.1             | IPHHAYKPFNGQRACIGMQFALQEATMVLGLVLLKHFDMVN-HTGYELKIKKEALTIKPD  | 446 |
| sp 008336.1 CYPB_BACSU | IPHHAYKPFNGQRACIGMQFALQEATMVLGLVLLKHFELIN-HTGYELKIKKEALTIKPD  | 446 |
| sp 008394.1 CYPD_BACSU | VPHHAYKPFNGQRACIGMQFALHEATLVLGMILKYFTLID-HENYELDIKQTLTLKPGD   | 446 |
| AEP89812.1             | VPHHAYKPFNGQRACIGMQFALHEATLVLGMILKYFTLID-HENYELDIKQTLTLKPGD   | 446 |

|            |                                                              |     |
|------------|--------------------------------------------------------------|-----|
| AEP91702.1 | IPHHAYKPFNGQRACIGMQFALQEATMVLGLVLKHFELIN-HTGYELKIKEALTIKPDD  | 446 |
| EHA31094.1 | IPHHAYKPFNGQRACIGMQFALQEATMVLGLVLKHFELIN-HTGYELKIKEALTIKPDD  | 448 |
| ADH07708.1 | VPHHAYKPFNGQRACIGMQFALHEATLVMGMLLQHFELID-YQNYQLDVKQTLTLKPGD  | 448 |
| EEM28177.1 | VPHHAYKPFNGQRACIGMQFALHEATLVMGMLLQHFELID-YQNYQLDVKQTLTLKPGD  | 448 |
| AFQ14162.1 | VPHHAYKPFNGQRACIGMQFALHEATLVMGMLLQHFELID-YQNYQLDVKQTLTLKPGD  | 448 |
| EEM95517.1 | VPHHAYKPFNGQRACIGMQFALHEATLVMGMLLQHFELID-YQDYQLDVKQTLTLKPGD  | 448 |
| EEN02344.1 | VPHHAYKPFNGQRACIGMQFALHEATLVMGMLLQHFELID-YQNYQLDVKQTLTLKPGD  | 448 |
| AFU13781.1 | VPHHAYKPFNGQRACIGMQFALHEATLVMGMLLQHFELID-YQNYQLDVKQTLTLKPGD  | 456 |
| EEM70897.1 | VPHHAYKPFNGQRACIGMQFALHEATLVMGMLLQHFELID-YEDYQLDVKQTLTLKPGD  | 456 |
| ADY22413.1 | VPHHAYKPFNGQRACIGMQFALHEATLVMGMLLQHFELID-YEDYQLDVKQTLTLKPGD  | 448 |
| EEM82895.1 | VPHHAYKPFNGQRACIGMQFALHEATLVMGMLLQHFELID-YQNYQLDVKQTLTLKPGD  | 448 |
| EEM52818.1 | VPHHAYKPFNGQRACIGMQFALHEATLVMGMLLQHFELID-YQNYQLDVKQTLTLKPGD  | 448 |
| EEM59126.1 | VPHHAYKPFNGQRACIGMQFALHEATLVMGMLLQHFELID-YEEYQLDVKQTLTLKPGD  | 456 |
| EEM47193.1 | VPHHAYKPFNGQRACIGMQFALHEATLVMGMLLQHFELID-YQNYQLDVKQTLTLKPGD  | 389 |
| EEM76899.1 | VPHHAYKPFNGQRACIGMQFALHEATLVMGMLLQHFELID-YEDYQLDVKQTLTLKPGD  | 456 |
| EEM88909.1 | VPHHAYKPFNGQRACIGMQFALHEATLVMGMLLQHFELID-YEDYQLDVKQTLTLKPGD  | 456 |
| EEM38196.1 | VPHHAYKPFNGQRACIGMQFALHEATLVMGMLLQHFELID-YQNYQLDVKQTLTLKPGD  | 448 |
| EEM21858.1 | VPHHAYKPFNGQRACIGMQFALHEATLVMGMLLQHFELID-YEDYQLDVKQTLTLKPGD  | 451 |
| ABK86139.1 | VPHHAYKPFNGQRACIGMQFALHEATLVMGMLLQHFELID-YEDYQLDVKQTLTLKPGD  | 456 |
| EJQ37805.1 | VPHHAYKPFNGQRACIGMQFALHEATLVMGMLLQHFELID-YQNYQLDVKQTLTLKPGD  | 448 |
| CCF04242.1 | VPHHAYKPFNGQRACIGMQFALHEATLVLGMILQHFTEFID-HTDYELDIKQTLTIKPGD | 445 |
| CCF05972.1 | IPADAYKPFNGQRACIGMQFALQEATMVLGLVLKHFELID-HTDYELTIKEALTIKPGD  | 446 |
| ABS73124.1 | VPHHAYKPFNGQRACIGMQFALHEATLVLGMILQHFTEFID-HTDYELDIKQTLTIKPGD | 445 |
| ABS74786.1 | IPADAYKPFNGQRACIGMQFALQEATMVLGLVLKHFELID-HTDYELTIKEALTIKPGD  | 446 |
| EKE46398.1 | VPHHAYKPFNGQRACIGMQFALHEATLVLGMILQHFTEFID-HTDYELDIKQTLTIKPGD | 445 |
| EKE48022.1 | IPADAYKPFNGQRACIGMQFALQEATMVLGLVLKHFELID-HTDYELTIKEALTIKPGD  | 446 |
| CCG48683.1 | VPHHAYKPFNGQRACIGMQFALHEATLVLGMILQHFTEFID-HTDYELDIKQTLTIKPGD | 445 |
| AFJ60789.1 | VPHHAYKPFNGQRACIGMQFALHEATLVLGMILQHFTEFID-HTDYELDIKQTLTIKPGD | 452 |
| AFJ62808.1 | IPADAYKPFNGQRACIGMQFALQEATMVLGLVLKHFELID-HTDYELTIKEALTIKPGD  | 446 |
| EEK66903.1 | VPHHAYKPFNGQRACIGMQFALHEATLVMGMLLQHFELID-YQDYQLDVKQTLTLKPGD  | 462 |
| EJQ52935.1 | VPHHAYKPFNGQRACIGMQFALHEATLVMGMLLQHFELID-YQDYQLDVKQTLTLKPGD  | 448 |
| EJS69574.1 | VPHHAYKPFNGQRACIGMQFALHEATLVMGMLLQHFELID-YQDYQLDVKQTLTLKPGD  | 448 |
| EJV63294.1 | VPHHAYKPFNGQRACIGMQFALHEATLVMGMLLQHFELID-YQDYQLDVKQTLTLKPGD  | 448 |
| EKF35778.1 | IPQHAYKPFNGQRACIGMQFALHEATMVLAMVHLNLELID-HTSYELDLKESLTIKPKD  | 445 |
| EGP08506.1 | RPANAWKPFNGQRACIGRGFAMHEAALALGMILQRFRLID-HERYQMHLKETLTIKPDG  | 455 |
| BAL78328.1 | RPINAWKPFNGQRACIGRGFAMHEAALALGMILQRFKLID-HQRYQMHLKETLTMKPEG  | 456 |
| BAC48147.1 | RPINAWKPFNGQRACIGRGFAMHEAALALGMILQRFKLID-HQRYQMHLKETLTMKPEG  | 456 |
| BAL12135.1 | RPINAWKPFNGQRACIGRGFAMHEAALALGMVLRQFKLID-HQRYQMHLKETLTMKPEG  | 456 |

CCE00185.1 RPNVNAWKPFNGQRACIGRGFAMHEAALALGMILQRFKLID-HQRYQLHLKETLTMKPEG 459  
EIG57609.1 RPNVNAWKPFNGQRACIGRGFAMHEAALALGMILQRFKLID-HQRYQMHLKETLTMKPEG 456  
EHR02046.1 RPNVNAWKPFNGQRACIGRGFAMHEAALALGMILQRFKLID-HQRYQMHLKETLTMKPDG 456  
EJN11211.1 RPNVNAWKPFNGQRACIGRGFAMHEAALALGMILQRFKLID-HQRYQMHLKETLTMKPEG 456  
CCF15606.1 IPYDAYKPFNGQRACIGQQFALQEATLVLGMILKYFDI ID-HNHYQLKIKETLTLKPEG 388  
CCF12687.1 VPHHAYKPFNGQRACIGMQFALHEATLVLGMILQNFELID-HTNYQLSIQQTTLTIKPEE 446  
ABB05850.1 LPPNSWKPFNGARACIGRPFAMQEHLVLIIMLQRFD'FSFADPDYELDVAETLTLKPAG 451  
EHP43606.1 LPHHAYKPFNGERACIGRQFALTEAKLALALMLRN'QFSD-PHDYQFRIKETLTLKPDA 477  
ABF10339.1 LPAHAYMPFGQGERACIGRQFALTEAKLALALMLRN'FAFQD-PHDYQFRLKETLTIKPDQ 453  
CAJ95800.1 LPRHAYMPFGNGERACIGRQFALTEAKLALALMLRN'QFTD-AHDYQFRIKETLTIKPDG 479  
AEI79937.1 LPRHAYMPFGNGERACIGRQFALTEAKLALALMLRN'QFTD-AHDYQFRIKETLTIKPDG 479  
AFD27790.1 LPTNAWKPFNGQRACIGQPFAMQEALLVLASVLRFDLTAARPDAPLKVKETLTLKPHD 449  
ABC62112.1 RPPHAYKPFNGQRACIGRQFAIQESILVLGMLLQRFE'LFH-DADYQLRIKETLSIKPDG 453  
EAQ27850.1 RPPHAYKPFNGQRACIGRQFAIQESILV'LAMILQRFE'LFH-HSDYKLDIKETLSIKPDE 453  
EIT84377.1 IPHHAYKPFNGQRACIGMQFALHEATLVIGMLLRRF'FTLGD-PTNYTLDIKQTLTIKPN 445  
CCG43686.1 IPRHAYKPFNGQRACIGQQFALHEATLVLGMVLYQFDFED-HTNYQLDVKEALTMKPEG 446  
ABX05160.1 IPEHAWKPFNGQRACIGRSFAMQEASLVLAMMLQRFE'LSQPQ-YQLHVKETLTLKPEG 450  
BAJ96920.1 LPPNSWKPFNGMRACIGRFFAIQEVTLV'LALILQQFDLIEENPSYQLKIREALTIKPEN 447  
GAB96874.1 IPANAWKPFNGQRSCIGRGFALQEALV'LALMLQRFDIALADPDYELAIKETLTLKPEG 493  
EFH80345.1 RPNAYKPFNGERACIGRQFAMQEATLVLGQILQRFN'LLD-PHNYELKIKQTLTLKPEG 456  
EFH88481.1 RPNAYKPFNGTQRSCIGREFALQEATLVLGMMLQRFY'PYT-TGIYQLKIREALTIKPAD 450  
EAW32450.1 RLPNAFKPFNGQRACIGSQFALQESILAIGMALQRFK'FID-HTNYQLDVKETLTLKPDD 450  
EIZ82104.1 LPPNAWKPFNGMRACIGRGFALQEHLV'LALILRRFELTEADPGYTLEIAETLTLKPHG 449  
AEV70722.1 RPSALFKPFGTGARSCIGRQFALHEATMALARVVHRY'RLID-SQHYVLQWDNALSRRPVG 443  
EFC41452.1 LPSNSWKPFNGSRGCIGRPFQAEAILV'LAMVLRFE'LIENDPNYHLSITQALTIKPNG 477  
ACV78954.1 LPAGAYQPFVGVVRCIGR'L'FALAEARATLAVLLHRFE'IRD'PHP-APLTIALHITLKPQN 448  
ACV78964.1 LPPNAYKPFNGTMRSCIGRQFALQEATLVLGMMLQR'FQFVD-HRNYQLHTKTTLTVKPDE 453  
ACV81379.1 VPPLAYRPFNGTGLRACIGRQFALQEATLVLGMMLQR'FDI ID-HRNYQLHTRATLTVKPED 453  
EIZ78677.1 LPPNAWKPFNGGRACIGRGFAMQEAMVLTMI'LRFTLTEADPGYQLKIAETLTLKPDA 447  
EJW15291.1 IPHDAYKPFNGQRACIGQQFALQEATLMLGLILKN'FELID-HTNYQLKLME'SLTIKPEG 445  
EJW16173.1 IPHHAYKPFNGQRACIGQQFALQEALV'LGMV'LKHFE'IID-HTNYQLKVKEALTLKPDD 448  
EHQ58913.1 VPHDAYKPFNGQRACIGQQFALQEATLVLGLLLKH'FE'FID-HTRYQLKVKETLTVKPDG 445  
EHQ59900.1 IPEHAYKPFNGQRACIGQQFALQEATLVLGMV'LKYFE'IID-HTNYQLKVKETLTLKPEG 446  
EHB66924.1 VPHDAYKPFNGQRACIGQQFALQEATLVLGLV'LKYFE'LIID-DQSYELKVKETLTLKPEG 445  
AFH60445.1 IPPHAYKPFNGQRACIGQQFALHEAVLVLGMV'L'RHFE'IID-HTNYQLKIKETLTLKPEG 446  
AEI42011.1 IPPHAYKPFNGQRACIGQQFALHEAVLVLGMV'L'RHFE'IID-HTNYQLKIKETLTLKPEG 446  
ADO57681.1 IPQDAYKPFNGQRACIGQQFALQEATLVLGMV'LKH'FE'LIID-HTHYELKVKETLTLKPGG 446  
EGG32133.1 VPHDAYKPFNGQRACIGQQFALQEATLVLGLV'LKYFE'LIID-NQPYELKVKETLTLKPEG 446

|            |                                                                |     |
|------------|----------------------------------------------------------------|-----|
| EGL17662.1 | IPYDAYKPFNGQRACIGQQFAMQEATLVLGMVLKHFNIMP-HTDYVLKVKETLTMKPEG    | 447 |
| ACX65034.1 | VPHDAYKPFNGQRACIGQQFALQEATLVLGLVLKYFELID-NQPYELQVKETLTLKPEG    | 446 |
| ACT11327.1 | LLPNSWQPFSGKRACIGRMFAMQEALVLLAMMLQRFDLSDPSYELKIVEHLTIKPDN      | 450 |
| AEA28016.1 | LPPNAFKPFGSGQRACIGRQFAMQEAVLVLGMLLQRFDLSD-HLGYELKIKEALTLKPEG   | 457 |
| EFP68091.1 | LHPHAYKPFNGERACIGRQFALTEAKLALAVILQRFDLSD-PYDYDFHIKETLTLKPDG    | 463 |
| EGY61507.1 | LHPHAYKPFNGERACIGRQFALTEAKLALAVILQRFDLSD-PYDYDFHIKETLTLKPDG    | 463 |
| EIE85788.1 | RSRFAWLPFSTGPRACIGMAFALQEAKTVLSMLLHRFDLFRHDGPNVRWDPKM-ATTKPLD  | 534 |
| EIE92534.1 | RSRFAWLPFSTGPRACIGMAFALQEAKTVLAMFLNRFDLFRHDGPNVRWDPKM-ATTKPVD  | 534 |
| BAE46296.1 | RPAHAYRPFSTGPRACIGRQFALHEAVLALAILQRYNFQS-DPEYKLDIRETSLKPVG     | 502 |
| BAH31604.1 | RPAHVYKPFSTGPRACIGRQFAIHEAVLVLGTILQKYTIEA-DPDYELKVAERLTLMPEG   | 458 |
| EEN84644.1 | RPAHVYKPFSTGPRACIGRQFAIHEAVLVLGTILQKYTIEA-DPDYELKVAERLTLMPEG   | 458 |
| EEN88978.1 | RPAHAYRPFSTGPRACIGRQFALHEAVLTLATILQRYSFQS-DPEYKLDVREALTLKPVG   | 542 |
| ABG96413.1 | RPAHVYKPFSTGPRACIGRQFALHESVLLVGTILRRYDIVG-DPDYRLKVAERLTLMPEG   | 490 |
| BAH52971.1 | RPAHVYKPFSTGPRACIGRQFALHESVLLVGTILRRYDIVG-DPGYRLKVAERLTLMPEG   | 457 |
| EHI44575.1 | RPAHVYKPFSTGPRACIGRQFALHESVLLVGTILRRYDIVG-DPSYRLKVAERLTLMPEG   | 492 |
| EID73168.1 | RPAHVYKPFSTGPRACIGRQFALHESVLLVGTILRRYDIVG-DPSYRLKVAERLTLMPEG   | 457 |
| EHK83749.1 | RPAHIFKPGWTGIRACIGRQFALHEAVLTLASLIRRYDFAP-EPGYELDVHEAITLKPRD   | 433 |
| EJI96173.1 | RPAHVYKPFSTGPRACIGRQFALHESVLLVGTILRRYDIVG-DPDYRLKVAERLTLMPEG   | 457 |
| ABI79384.1 | RPAHAYKPFSTGPRACIGRQFALHEAVLALAQILTRFDIVP-TADYELTVEELLTIRPEN   | 486 |
| CAR47816.1 | RPAHAYKPFSTGPRACIGRQFALHEAVLALALARVLTDFDIAP-VPGYELKVEELLTIRPKN | 488 |
| AEK26937.1 | RPAHIFKPGWTGIRACIGRQFALHEAVLTLASLIRRYDFAP-EPGYELDVHEAITLKPRD   | 465 |
| ABE39056.1 | RPANAWKPFNGQRACIGRQFAMHEAALALGMILQRFLID-HQRYRMVLKETLTIKPEG     | 455 |
| ABD08340.1 | RPANAWKPFNGQRACIGRQFAMHEAALALGMILQRFLID-HTRYRMVLKETLTIKPEG     | 454 |
| CAM03474.1 | RGPHAFKPFSTGPRACIGRQFALDEATMVLAMLAHRYRLVD-HAGYRLKVKETLTLKPEG   | 447 |
| EJF54063.1 | IPHSAYLPGHGRRSCIGRPFQFAKLAIAMILQRFDLSDPNDYELVLDLTLTLKPDN       | 462 |
| AFC23737.1 | IPPSAYLPGHGRRSCIGRPFQFAKLAIAMILQRFDLSDPNDYELVLDLTLTLKPDN       | 450 |
| ADG98903.1 | LPPRIYKPFSTGPRACIGRQFALHEIILTAAIILHQFDLEP-DPGYTITATEHPTLKPDG   | 461 |
| EGI54680.1 | LPPHAWKPFNGQRACIGRQFAMQEAILVMALMLQRFDLSDPNDYELVLDLTLTLKPDN     | 446 |
| AEW97204.1 | RPVHAFKPFSTGPRACIGRQFALHEAVMLLGMILHRYRFLD-HADYRLRVRETTLKPDG    | 466 |
| CAJ88567.1 | RAPHTFKPFSTGPRACIGRQFALHEATLVLGMLLRRYELRP-EPEYRLRVTERLTLMPEG   | 476 |
| BAC68285.1 | HHPHAYKPFNGVRACIGRQFALTEARLALALVLQKFKFAD-TDDYKMDVKEALTRKPGG    | 454 |
| BAC75137.1 | RAAHTFKPFSTGPRACIGRQFALHEATLVLGMLLRRYELRA-EPGYRLRVAERLTLMPEG   | 469 |
| EDY51256.1 | RPGHLYKPFNGERSACIGRQFALHEATLMLGLIVHRYRLID-HADYELKIKETLTIKPDG   | 439 |
| EFG07822.1 | RPGHLYKPFNGERSACIGRQFALHEATLMLGLIVHRYRLID-HADYELKIKETLTIKPDG   | 471 |
| EHN78335.1 | RAPHTFKPFSTGPRACIGRQFALHEATLVLGMLLRRYELRP-DPGYRLRVTERLTLMPEG   | 479 |
| CAB66201.1 | RAPHTFKPFSTGPRACIGRQFALHEATLVLGMLLRRYELRP-EPEYRLRVTERLTLMPEG   | 483 |
| EGG48117.1 | RPAHTFKPFSTGPRACIGRQFALHEATLVLGMLLRRYTVKP-DPAYRLRIAERLTLMPEG   | 483 |
| EFL20831.1 | RPVHLFKPFNGERACIGRQFALHEATLVLALLVHRYRLID-HTNYQLKIKQSLTLKPDG    | 461 |

|            |                                                               |     |
|------------|---------------------------------------------------------------|-----|
| EFL28515.1 | RPVHAYKPFPGTGERACIGRQFALHEATMLLAMLVHRYRLID-HADYRLHVKESLTLKPEG | 455 |
| AEY93311.1 | RPPHTFKPFPGTGARACIGRQFALHEATLVLGLLLRRYDLHA-DPGYRLSVAERLTLMPEG | 473 |
| AEY93321.1 | RPVHAFKPFPGTGERACIGRQFALHEATMLLALLVHRYRLHD-HAGYRLTVKETLTLKPEG | 453 |
| EFD71156.1 | RAPHTFKPFPGTGARACIGRQFALHEATLVLGLLLRRYELRP-EPGYRLRVTERLTLMPEG | 485 |
| CBG67789.1 | RPVHLFKPFGSGERACIGRQFALHEATLVLALVIHRYRLID-HTDYQLKIKQSLTIKPDE  | 456 |
| CBG68112.1 | RAPHTFKPFPGTGARACIGRQFALHEATLVLGLLLRRYELTP-EPGYRLRVVERLTLMPDG | 474 |
| EFL10082.1 | RPAQAYKPFPGTGERACIGRQFALHEAVLALGIMLQRYDFEA-DPAYELKIVESLTLKPSG | 485 |
| EFF88741.1 | RSVHLFKPFGNGERACIGRQFALHEATLVLGLLVHRYRLID-HADYELKIKSSLTIKPDG  | 455 |
| EDY58112.1 | RPPHVFKPFPGTGARACIGRQFALHEATLVLGLLLRRYELRA-DPGYRLSVTERLTLMPEG | 466 |
| EFL36674.1 | RAPHTFKPFPGTGARACIGRQFALHEATLVLGLLLRRYELRP-DPAYRLRVTERLTLMPDG | 483 |
| EFL36680.1 | RPVHAFKPFPGTGERACIGRQFALHEATMLLAMLVHRYRLRD-HADYRLDVKETLTLKPEG | 503 |
| EFE65335.1 | RPPHVFKPFPGTGARACIGRQFALHEATLVLGLLLRRYELRP-DPGYRLRVTERLTLMPRG | 471 |
| EGX54696.1 | RTPHAFKPFPGTGARACIGRQFALHEATLVLGLLLRRYDFAG-DPGYRLRVAERLTLMPQG | 468 |
| ACZ89135.1 | LPDKAWLPFGNGSRSCIGRAFALQEATLVL SMLLQRFEFWAPEP-YDLKVKETLTLKPEG | 451 |
| ABD83817.1 | RPVNAWRPFGNGQRACIGRQFALHEAALALGMILQRFKLID-HQRYQIRLKETLTIKPDG  | 456 |
| ADU39615.1 | RPVNAFKPFGNGQRACIGRQFALQEAVLTLGMILQRFNLVD-HTGYKLIKIKEALTIKPEN | 454 |
| EJL72014.1 | RPANAFKPFNGQRACIGRQFALQEAVLTLGMILQRFNLVD-HTGYKLIKIKEALTIKPEN  | 454 |

: \* : . \* \* . \*\*\* \*\* \* :

|                        |                                                       |     |
|------------------------|-------------------------------------------------------|-----|
| sp P14779.2 CPXB_PRIM2 | FVVKAKSKKIPLGGI-----PS----PST-----EQSAKKVRKKAEN       | 477 |
| ADF40088.1             | FVVKAKSKKIPLGGI-----PS----PSP-----EQSAKKVRKKAEN       | 477 |
| ADE70259.1             | FVVKAKSKQIPLGGI-----PS----PSR-----EQSAKKERKTVEN       | 477 |
| AEN88827.1             | FVVKAKSKKIPLGGI-----PS----LST-----EQSAKKVRKKVEN       | 477 |
| KFN05180.1             | FVVKAKSKKIPLGGI-----PS----PST-----EQSAKKVRKKAEN       | 477 |
| ACZ37122.1             | FVVKAKSKQIPLGGI-----PS----PSR-----EQSAKKERKTVEN       | 477 |
| ADA57055.1             | FVVKAKSKKIPLGGI-----PS----PST-----EQSAKKVRKKVEN       | 477 |
| ADA57058.1             | FVVKAKSKQIPLGGI-----PS----PSR-----EQSAKKERKTVEN       | 477 |
| ADA57059.1             | FVVKAKSKKIPLGGI-----PS----PST-----EQSAKKVRKKVEN       | 477 |
| ADA57061.1             | FVVKAKSKQIPLGGI-----PS----PSR-----EQSAKKERKTVEN       | 477 |
| ADA57062.1             | FVVKAKSKKIPLGGI-----PS----PST-----EQSAKKVRKKVEN       | 477 |
| ADA57068.1             | FVVKAKSKQIPLGGI-----PS----PSR-----EQSAKKERKTVEN       | 477 |
| AAT62301.1             | FKIRIVPRNQTISHTTVLAPT---EEK---LKK-----HEIKKQVQKTPSIIG | 490 |
| AAM54108.1             | LVRARPRADRPGATATV-----ETV-VPHQVPATH                   | 482 |
| EFQ83738.1             | FELTLTPRTPAALTGGPAEDDQEPSEV-----P-----P-S-----        | 484 |
| EFL88452.1             | FTMKVKLRPDVMYSAKGPTA---DA-----DTTDAKKPGENNRE          | 488 |
| BAF89518.1             | LDMLLERRPEVKGRFPVRTEAPKT-----QGAPLAVAQ                | 579 |
| CBI43648.1             | FKIRVKNKDVSNOQSAQVHK-----AEG-----GGHKEET----KEIP      | 480 |
| AEB22839.1             | FHIRVRPRSKEAVPAAFTAEE---KAA---EDV-----TK-EKQETKGASIIG | 487 |
| EDT22025.1             | FKIRIVPRNQTISHTTVLAPT---EEK---LKN-----HEIKQQVQKTPSIIG | 490 |
| AFH84458.1             | FKIRIVPRNQTISHTTVLAPT---EEK---LKN-----HEIKQQVQKTPSIIG | 498 |
| ADP31197.1             | FKIRVQSRNQEAMNSAVLTS---EKA---PDD-----QK-EKPDTKSASIVG  | 487 |
| ACP19384.1             | FKIRILPRKQTISHPTVLAPT---EGK---LKN-----DEIKQNVQKTPSIIG | 490 |
| ADL27534.1             | FKIRILPRKQTISHPTVLAPT---EDK---LKN-----DEIKQHVQKTPSIIG | 490 |
| ACO29732.1             | FKIRIVPRNQTISHTTVLAPT---EEK---LKN-----HEIKQQVQKTPSIIG | 490 |
| EDX65100.1             | FKIRIVPRNQTISHTTVLAPT---EEK---LKN-----HEIKQQVQKTPSIIG | 490 |
| EEK61456.1             | FKIRILPRKQTISHPTALAPT---EDK---LKN-----DEIKQHVQKTPSIIG | 490 |
| EEL16232.1             | FKIRIVPRNQTISHTTVLAPT---EEK---LKK-----HEIKQQVQKTPSIIG | 498 |
| EDZ53094.1             | FKIRILPRKQTISHPTALAPT---EDK---LKN-----DEIKQHVQKTPSIIG | 490 |
| EEL81346.1             | FKIRILPRNQTISHTTVLAPI---EEK---LKN-----HETKQQVQKTPSIIG | 504 |
| EEL87105.1             | FKIRILPRNQTISHTTVLAPI---EEK---LKN-----DEIEQQVQKTPSIIG | 504 |
| EEL75761.1             | FKIRILPRKQTISHPTVLAPT---EGK---LKN-----DEIKQHVQKTPSIIG | 431 |
| ACK88541.1             | FKIRIVPRNQTISHTTVLAPT---EEK---LKK-----HEIKQQVQKTPSIIG | 490 |
| EJQ05303.1             | FKIRIVPRNETISHNTVLAPT---EEK---LKN-----DETKQQVQKTPSIIG | 490 |
| EEK50040.1             | FKIRILPRKQTISHPTVLAPT---EDK---LKN-----DEIKQHVQKTPSIIG | 490 |
| AAS42149.1             | FKIRIVPRNQNISHTTVLAPT---EEK---LKN-----HEIKQQVQKTPSIIG | 490 |
| AAP10153.1             | FKIRILPRKQTISHPTVLAPT---EDK---LKN-----DEIKQHVQKTPSIIG | 490 |
| EEK83466.1             | FKIRIVPRNQTISHTTVLAPT---EEK---LKN-----HETKQQVQKTPSIIG | 498 |

|            |                                                         |     |
|------------|---------------------------------------------------------|-----|
| ACK63698.1 | FKIRILPRKQTI SHPTVLAPT---EDK----LKN-----DEIKQHVQKTPSIIG | 431 |
| EJS57156.1 | FKIRILPRKQTI SHPTVLAPT---EDK----LKN-----DEIKQHVQKTPSIIG | 490 |
| EJS56605.1 | FKIRILPRNQTISHTTVLAPI---EEK----LKN-----HEIEQQVQKTPSIIG  | 490 |
| EJS68951.1 | FKIKVRSRNQAAIRPSVLTPV---AET----PED-----HKTEKQVQNAASLQG  | 489 |
| EJQ10567.1 | FKIRILPRKQTI SHPTALAPT---EDK----LKN-----DEIKQHVQKTPSIIG | 490 |
| EJQ13433.1 | FKIRILPRNQTISHTTVLAPI---EEK----LKN-----DEIEQQVQKTPSIIG  | 490 |
| EJQ20399.1 | FKIRILPRKQTI SHPTALAPT---EDK----LKN-----DEIKQHVQKTPSIIG | 490 |
| EJQ30236.1 | FKIRILPRKQTI SHPTALAPT---EDK----LKN-----DEIKQHVQKTPSIIG | 490 |
| EJQ51278.1 | FKIKVQSRNQAAIRPSVLTPV---AET----PED-----HKTEKQVQNAASLQG  | 489 |
| EEL10858.1 | FKIRILPRKQTI SHPTVLAPT---EDK----LKN-----DEIKQHVQKTPSIIG | 490 |
| EEL05393.1 | FKIRILPRNQTISHTTVLAPI---EEK----LKN-----DEIEQQVQKTPSIIG  | 504 |
| EEK94080.1 | FKIRILPRKQTI SHPTVLAPT---EDK----LKN-----DEIKQHVQKTPSIIG | 493 |
| EEK99882.1 | FKIRIVPRNETISHNTVLAPT---EEK----LKN-----DETKQQVQKTPSIIG  | 493 |
| EEK55784.1 | FKIRIVPRNQTISHTTVLAPT---EEK----LKN-----HEIKQQVQKTPSIIG  | 498 |
| ADK05784.1 | FKIRIVPRNETISHTTVLAPT---EEK----LKN-----HETKQQVQKTPSIIG  | 490 |
| AAU17340.1 | FKIRIVPRNQTISHNTVLAPT---EEK----LKN-----HEIKQKVQKIPSIIG  | 490 |
| EEL64394.1 | FKIRILPRKQTI SHPTALPPT---EDK----LKN-----HEIKQHVQKTPSIIG | 490 |
| AEW56259.1 | FKIRIVPRNQTISHTTVLAPT---EEK----LKN-----HEIKQQVQKTPSIIG  | 490 |
| AFQ11690.1 | FKIRIVPRNQTISHTTVLAPV---EEK----LKN-----HEIKQQVQKTPSIIG  | 490 |
| EAL16831.1 | FKIRIVPRNQTISHTTVLAPT---EEK----LKN-----HETKQQVQKTPSIIG  | 490 |
| ACK94296.1 | FKIRILPRKQTI SHPTVLAPT---EDK----LKN-----HEIKQHVQKTPSIIG | 490 |
| EDZ58760.1 | FKIRIVPRNETISHNTVLAPT---EEK----LKN-----DETKQQVQKTPSIIG  | 490 |
| EJV84218.1 | FKIRILPRNQTISHTTVLAPI---EEK----LKN-----HEIEQQVQKNPSIIG  | 490 |
| EJQ69212.1 | FKIRILPRNQTISHTTVLAPI---EEK----LKN-----DEIEQQVQKTPSIIG  | 490 |
| EJQ80339.1 | FKIRILPRNQTISHTTVLAPI---EEK----LKE-----HEIKQQVQKTPSIIG  | 490 |
| EJV81602.1 | FKIRILPRKQTI SHPTVLAPT---EDK----LKN-----DEIKQHVQKTPSIIG | 490 |
| EJQ95474.1 | FKIRIVPRNETISHTTVLAPT---EEK----LKN-----HETKQQVQKTPSIIG  | 490 |
| EEK44229.1 | FKIRIVPRNETISHTTVLAPT---EEK----LKN-----DETKQQVQKTPSIIG  | 498 |
| EEK88560.1 | FKIRILPRKQTI SHPTVLAPT---EDK----LKN-----DEIKQHVQKTPSIIG | 490 |
| EJR07451.1 | FKIRILPRKQTI SHPTVLAPT---EDK----LKN-----HEIKQHVQKTP---G | 487 |
| EJR16542.1 | FKIRIVPRNETISHTTVLAPT---EEK----LKN-----HETKQQVQKTPSIIG  | 490 |
| BAL18840.1 | FKIRIVPRNETISHNTVLAPT---EEK----LKN-----DETKQQVQKTPSIIG  | 490 |
| EDX69960.1 | FKIRIVPRNQTISHTTVLAPT---DEK----LKN-----REIKQQVQKTPSIIG  | 490 |
| ACM13462.1 | FKIRIVPRNQTISHTTVLAPT---EEK----LKN-----HETKQQVQKTPSIIG  | 490 |
| EEK75631.1 | FKIRILPRNQTINHPAVLAPI---EDK----PKN-----HEIKQHVQKTPSIIG  | 490 |
| EEL25491.1 | FKIRILPRKQTI SHPTVLAST---EDK----LKN-----DEIKQHVQKTPSIIG | 431 |
| EEL21990.1 | FKIRILARNQTI SHPTVLAPI---EEK----QKD-----HEIKQQVQKTPSIIG | 498 |
| EEL33825.1 | FKIRILARNQTI SHPTVLAPI---EEK----QKD-----HEIKQQVQKTPSIIG | 498 |

|                        |                                                         |     |
|------------------------|---------------------------------------------------------|-----|
| EEL44933.1             | FKIRIVPRNQTISHTTVLAPT---EEK----LKN-----HEIKQQVQKTPSIIG  | 498 |
| EEL50167.1             | FKIKVRFNRQAAIRPSVLTPV---AAT----PED-----HKTEQQVQNAASLQG  | 568 |
| EJR22930.1             | FKIRILPRKQTISHPTALAPT---EDK----LKN-----HEIKQHVQKTPSIIG  | 490 |
| EJP91231.1             | FKIRILPRKQTISHPTVLAPT---EDK----LKN-----HEIKQHVQKTPSIIG  | 490 |
| EJR37623.1             | FKIRILPRKQTISHPTVLAST---EDK----LKN-----DEIKQHVQKTPSIIG  | 490 |
| EJR50635.1             | FKIRIVPRNETISHTTVLAPT---EEK----LKN-----HETKQQVQKTPSIIG  | 490 |
| EJR64551.1             | FKIRILPRNQTISHPTVLAPI---EEK----QKD-----HEIKQQVRKTPSIIG  | 490 |
| EJR75620.1             | FKIRIIPRKQTISHPTVLAPT---EGK----LKN-----DEIKQHVQKTPSIIG  | 490 |
| EJR82049.1             | FKIRILPRKQTISHPTVLAPT---EDK----LKN-----DEIKQHVQKTPSIIG  | 490 |
| EJR83659.1             | FKIRILPRKQTISHPTVLAPT---EDK----LKN-----DEIKQHVQKTPSIIG  | 490 |
| EJR91135.1             | FKIRVQLRDKKITSTFNK---SEKE----NTS-----ISKQNNKAPNASIIG    | 486 |
| EJR97241.1             | FKIRILPRKQTISHPTVLAPT---EDK----LKN-----DEIKQHVQKTPSIIG  | 490 |
| EJS05852.1             | FKIRILPRNQTISHTTVLAPI---EEK----LKN-----DEIEQQVQKTPSIIG  | 490 |
| EDX58768.1             | FKIRIVPRNQTISHTTVLAPT---EEK----LKN-----HEIKQQVQKTPSIIG  | 490 |
| AAU24352.1             | FTIRVRPRKKEAMTAMPGAQ-----PEE-----NGRQEERPSAPAAEN        | 484 |
| ABY44122.1             | FKIRILPRNQTISHTTVLAPI---EEK----LKN-----DEIEQQVQKTPSIIG  | 490 |
| EDW23201.1             | FKIKVPRKQQLFMVPPKEE-----TKK-----S-----TTTDESKVK         | 478 |
| ABV62358.1             | FKIKVPRKQQLFMAPPKEE-----TKK-----S-----TTIEESKVK         | 478 |
| EIF12263.1             | FHIRVRPRNKEAVAAALPAAE---KAA----EDV-----GK-EKRETKGASIIG  | 486 |
| EIF14027.1             | FKIRVKNKDVSNHQPVQNHK-----AEG-----SGHKEET----KEIP        | 480 |
| EHL75405.1             | FKIRILPRKQTISHPTALAPT---EDK----LKN-----DEIKQHVQKTPSIIG  | 490 |
| EJD67577.1             | FHIRVRPRNKEAVAAALPAAE---KAA----EDV-----EK-EKRETKGASIIG  | 486 |
| EJD68347.1             | FKIRVKNKDVSNHQPVQNHK-----AEG-----SGHKEET----KEIP        | 480 |
| EFV73436.1             | FTIRVRPRKKEAMTAMPGAQ-----PEE-----NGRQEERPSAPAAEN        | 498 |
| CBY93692.1             | FKIRIVPRNQTISHTTVLAPT---EEK----LKN-----HETKQQVQKTPSIIG  | 490 |
| AFI27355.1             | FRIKVVQTRHQEAIHADIQATE---KPG----PDK-----QK-EETETKGASVIG | 487 |
| AFI29229.1             | FKITVKPRKTAAINVORREQ-----ADI-----KTETKPK----ETQP        | 480 |
| EIL85422.1             | FKIKVPRKQQFFMAPPKEE-----PTK-----S-----TASAEAKIA         | 478 |
| ADV93500.1             | FKITVKPRKTAAINVORKEQ-----ADI-----KAETKPK----ETKP        | 480 |
| ADV95715.1             | FHIRVQSRNQDAIHADVQAVE---KAA----SDE-----QK-EKTEAKGTSVIG  | 487 |
| BAI84248.1             | FHIRVQSRHQEAIHADVQTAE---KAA----PDE-----QK-EKTEAKGASVIG  | 487 |
| EFG90288.1             | FKITVKPRKTAAINVORKEQ-----ADI-----KTETKPK----ETKP        | 480 |
| EFG91781.1             | FRIRVQTRHQEAIHTDVPAAE---KEA----PVE-----QK-EETETKGASVIG  | 487 |
| AEP85668.1             | FRIRVQTRHQEAIHADVPAAE---KAA----PDE-----QK-EKTETKGASVIG  | 487 |
| AEP87558.1             | FKITVKPRKTAAINVORKEQ-----ADI-----KTETKPK----ETKP        | 480 |
| sp O08336.1 CYPB_BACSU | FKITVKPRKTAAINVORKEQ-----ADI-----KAETKPK----ETKP        | 480 |
| sp O08394.1 CYPD_BACSU | FHISVQSRHQEAIHADVQAAE---KAA----PDE-----QK-EKTEAKGASVIG  | 487 |
| AEP89812.1             | FHIRVQSRHQEAIHADVQAAE---KAA----PDE-----QK-EKTEAKDASVIG  | 487 |

|            |                                                       |     |
|------------|-------------------------------------------------------|-----|
| AEP91702.1 | FKITVKPRKTAAINVQRKEQ-----ADI-----KAETKPK----ETKP      | 480 |
| EHA31094.1 | FKITVKPRKTAAINVQRKEQ-----ADI-----KAETKPK----ETKP      | 482 |
| ADH07708.1 | FKIRILPRKQTISHPTVLAPT---EDK---LKN-----DEIKQHVQKTPSIIG | 490 |
| EEM28177.1 | FKIRILPRKQTISHPTVLTPT---EDK---LKN-----DEIKQHVQKPPSIIG | 490 |
| AFQ14162.1 | FKIRILPRKQTISHPTVLAPT---EDK---LKN-----HEIKQHVQKTPSIIG | 490 |
| EEM95517.1 | FKIRIVPRNQTISHTTVLAPT---EEK---LKK-----HEIEQHVQKTPSIIG | 490 |
| EEN02344.1 | FKIRILPRKQTISHPTVLAPT---EDK---LKN-----HEIKQHVQKTPSIIG | 490 |
| AFU13781.1 | FKIRILARNQTISHPTVLAPI---EEK---QKD-----HEIKQQVQKTPSIIG | 498 |
| EEM70897.1 | FKIRIVPRNQTISHTTVLAPT---EEK---LKK-----HEIKQQVQKTPSIIG | 498 |
| ADY22413.1 | FKIRIVPRNQTISHTTVLAPT---EEK---LKN-----HETKQQVQKTPSIIG | 490 |
| EEM82895.1 | FKIRILPRKQTISHPTALAPT---EDK---LKS-----HEIKQHVQKTPSIIG | 490 |
| EEM52818.1 | FKIRILPRKQTISHPTALAPT---EDK---LKN-----DEIKQHVQKTPSIIG | 490 |
| EEM59126.1 | FKIRIVPRNQTISHTTVLAPT---EEK---LKN-----HEIKQQVQKTPSIIG | 498 |
| EEM47193.1 | FKIRIIPRKQTISHPTVLAPT---EGK---LKN-----DEIKQHVQKTPSIIG | 431 |
| EEM76899.1 | FKIRIVPRNQTISHTTVLAPT---EEK---LKK-----HEIKQQVQKTPSIIG | 498 |
| EEM88909.1 | FKIRIVPRNQTISHTTVLAPT---EEK---LKN-----HETKQQVQKTPSIIG | 498 |
| EEM38196.1 | FKIRILPRKQTISHPTVLAPT---EDK---LKN-----HEIKQHVQKTPSIIG | 490 |
| EEM21858.1 | FKIRIVPRNQTISHTTVLAPT---EEK---LKN-----HETKQQVQKTPSIIG | 493 |
| ABK86139.1 | FKIRIVPRNQTISHTTVLAPT---EEK---LKN-----HEIKQQVQKTPSIIG | 498 |
| EJQ37805.1 | FKIRILARNQTISHPTVLAPI---EEK---QKD-----HEIKQQVQKTPSIIG | 490 |
| CCF04242.1 | FHIRVRPRNKGAVAAALPAAE---KAA---EDV-----EK-EKRETKGASIIG | 486 |
| CCF05972.1 | FKIRVKNKDVSNHQPVQNHK-----AEG-----GGHKEET----KEIP      | 480 |
| ABS73124.1 | FHIRVRPRNKEDVAAALPAAE---KAA---EDV-----GK-EKRETKGASIIG | 486 |
| ABS74786.1 | FKIRVKNKDVSNHQPVQNHK-----AEG-----SGHKEET----KEIP      | 480 |
| EKE46398.1 | FHIRVRPRNKGAVAAALPAAE---KAA---EDV-----EK-EKRETKGASIIG | 486 |
| EKE48022.1 | FKIRVKNKDVSNHQPVQNHK-----AEG-----GGHKEEM----KEIP      | 480 |
| CCG48683.1 | FHIRVRPRNKGAVAAALPAAE---KAA---EDV-----EK-EKRETKGASIIG | 486 |
| AFJ60789.1 | FHIRVRPRNKGAVAAALPAAE---KAA---EDV-----EK-EKRETKGASIIG | 493 |
| AFJ62808.1 | FKIRVKNKDVSNNQQAQNHK-----AEG-----SGHKEEM----KEIP      | 480 |
| EEK66903.1 | FKIRILPRNQTISHTTVLAPI---EEK---LKD-----HEIEQQVQKTPSIIG | 504 |
| EJQ52935.1 | FKIRILSRNQTISHTTVLAPT---EEK---LKN-----HETKQQVQKTPSIIG | 490 |
| EJS69574.1 | FKIRILPRNQTISHTTVLAPI---EEK---LKN-----HETKQQVQKTSSIIG | 490 |
| EJV63294.1 | FKIRILPRNQTISHTTVLAPI---EEK---LKN-----HEIEQQVQKTPSIIG | 490 |
| EKF35778.1 | FKIKVRPRKQQFFMAPPKEE-----PKK-----S-----TASAASKVA      | 478 |
| EGP08506.1 | FKIKVRPRPDSEKITAIPA-AAST-----GTAAPAAPARARP            | 492 |
| BAL78328.1 | FKIKVRPRADRERGAYGGPV-AA-S-----AAPKAPRQPTARP           | 492 |
| BAC48147.1 | FKIKVRPRADRERGAYGGPV-AAVS-----SAPRAPRQPTARP           | 493 |
| BAL12135.1 | FKIKVRPRADRERGAYGGPV-AVAS-----SGPRAPRKPTTRP           | 493 |

|            |                                                             |     |
|------------|-------------------------------------------------------------|-----|
| CCE00185.1 | FKIKVRPRNDRDRSAPPSSR-PGTA-----AQGPSVQSARTRP                 | 496 |
| EIG57609.1 | FKIKVRPRADRERGAYGGPV-AV-S-----SAPKAPRQPTARP                 | 492 |
| EHR02046.1 | FKIKVRPRADRERGAYGGPV-AV-S-----SAPKAPRQPTARP                 | 492 |
| EJN11211.1 | FKIKVRPRADRERGAYGGPV-AAAS-----SGPRAPRQPTTRP                 | 493 |
| CCF15606.1 | FTMRVRLRTNELSFQITGK---EKER---E-K-----TQA-QPTASTIVD          | 425 |
| CCF12687.1 | FYIRVKQRKKQKLDQSSQEPE-VGAVN---IRG-----TDS-RWEQIKTSIAR       | 489 |
| ABB05850.1 | FRVNVKPRARGALKVPDT---ALHARS---NAQS-----PSV-APVQSIAPG        | 491 |
| EHP43606.1 | FTLRARRRRRAHERIVTAAAAAS--IA-----SAQSQPPVVR                  | 510 |
| ABF10339.1 | FVLRVRRRRPHERFVTRQA-S--QA-----VADAAQTDVR                    | 485 |
| CAJ95800.1 | FTVRARRRRPHERIAAAPLAG--TA-----QAPRAGPDVQ                    | 512 |
| AEI79937.1 | FTVRARRRRPHERIAAAPVAG--TA-----QAPQAGPDVQ                    | 512 |
| AFD27790.1 | LRLRARLRGGTARPGQP-DPADQSVAQ-----ITP--TGGGGPLT               | 486 |
| ABC62112.1 | FTIKARLRHDVERGGVATVEPESK-----T-PDQAAAVP                     | 486 |
| EAQ27850.1 | FTIKARMRKDVERGGKATEDAEAA-----STEPAEPKVP                     | 487 |
| EIT84377.1 | FFITAAPRVDAPPFMQQEK-----TSSQTPQLVVT                         | 476 |
| CCG43686.1 | LTMRVKSRRDAALMQPAPA-----QKE---A-----EKSSKTEAQSVPD           | 482 |
| ABX05160.1 | LTVRARVRKNIVRSTKPT-Q-----PNV-AIQSNPNQA                      | 481 |
| BAJ96920.1 | FFIRVKTRGTAPHVTPIS----LQPPQ---KG-----ITE-KAYSTPANV          | 484 |
| GAB96874.1 | LFARFTVRPGRSADRVSARRPEAEPR---NGQAG-----GETQS-AAQTLPEEQ      | 539 |
| EFH80345.1 | FTMKVRKRSDAERNLQGFVK-PVEV-----TATREEKKAQVVAN                | 494 |
| EFH88481.1 | FYMRVRPRTDIDHIIITPLDEDTVSET-----ELV-----MVEAIHPEPEVPQKI     | 495 |
| EAW32450.1 | FRLRLKKRTDQDRKLNVTGPEID-----DRPKVKDVANLTS                   | 487 |
| EIZ82104.1 | FRIHARRRGAARPR--S-AVPTAPQRP-----MT--AGRTGAPAR               | 484 |
| AEV70722.1 | FCLDVVPRTPDDRRSDVLVDTADTAVR-----PTPAHV TAM                  | 479 |
| EFC41452.1 | LFLKVKPRSNWKGSQLVVRTNASNTSSE-----NSH-TDDQNSTST              | 516 |
| ACV78954.1 | VTLRFLARPGVSAGTAAATASPADVRP---ADGRTGTDMPGATAAGSVAAGSVQPPNSD | 505 |
| ACV78964.1 | FFIKVKLRPGRALVHRETAAAAATA-----AP-AAVARPAVA                  | 489 |
| ACV81379.1 | MWIRLRPREGFAGVARAQAAVTGAA-----DEGPAEADASAVAT                | 492 |
| EIZ78677.1 | FRIRARRRDDITVRARS-KIPALAPKA-----LSP-VSAPAQANA               | 485 |
| EJW15291.1 | FTMQVRPRRTRNEAISVHG---GQRI---PSI-----LET-T-AISELNSSF        | 484 |
| EJW16173.1 | FRIRIRQRKKLGAVAWSEK---GAAA---GES-----REQEHVQQAPLAE          | 487 |
| EHQ58913.1 | FTIKIRPRRRQTGFIFAGG---GSGT---PAL-----RKN-AAELEALDPAE        | 485 |
| EHQ59900.1 | FTIRVRLRAGQGAFTISAV---GNEA---PVG-----KPA-VQTAAPTVE          | 484 |
| EHB66924.1 | FHIKIRNRQDGTALMIPGG---GAAA---STE-----SEKRQSTSPEP-VTH        | 485 |
| AFH60445.1 | FTMRVRSRIEPLAVVMPGR---EAAP---LEE-----KRE-QAAEAAPVP          | 484 |
| AEI42011.1 | FTMRVRSRIEPQAVVMPGR---EAAP---LEE-----KRE-QAAEAAPVP          | 484 |
| ADO57681.1 | FTIQVRPRSTQTTIMLPGA---AQEL---HEK-----EEQKVAAPHA             | 483 |
| EGG32133.1 | FRIQVRSRQGGTALLVPGG---GQVA---SLE-----SKKRDDVKSDPAAAF        | 487 |

|            |                                                             |     |
|------------|-------------------------------------------------------------|-----|
| EGL17662.1 | FTMKVEPRQGGVAVTIPGT----AVSA----ADD-----KRVKEQAAPLSVN        | 486 |
| ACX65034.1 | FRIQVRSRQGGTALLVPGG----GQVA----SLE-----SKKRDDAKSDPSAAF      | 487 |
| ACT11327.1 | LKIRIRVRKPSKT--LAR---GVTPKE----TSNK-----MAV-MPVAKAQHH       | 488 |
| AEA28016.1 | LFIQLRPRPDRTTGTVVVAPNAAQA-----PAAKPKLRLAPVGD                | 496 |
| EFP68091.1 | FRLRARLRNARERLSIAAPSRAEAT-----TQVDAESALA                    | 498 |
| EGY61507.1 | FRLRARLRNARERLSIAAPSRAEAT-----TQVDAESALA                    | 498 |
| EIE85788.1 | LFMTIHPRENFPENPKAASKKSATM---TERDGKQTAM-----PVISDNIGTK       | 580 |
| EIE92534.1 | LFMTIHPRENFPKPNGDSVPPQKSDASSNQAESKTATAM-----PVISAQKNAD      | 583 |
| BAE46296.1 | FELSLQRR-----                                               | 510 |
| BAH31604.1 | FNLTVRRR-----                                               | 466 |
| EEN84644.1 | FNLTVRRR-----                                               | 466 |
| EEN88978.1 | LKLSLQRL-----                                               | 550 |
| ABG96413.1 | FTLQLRRR-----                                               | 498 |
| BAH52971.1 | FTLRIRRR-----                                               | 465 |
| EHI44575.1 | FTLQLRRR-----                                               | 500 |
| EID73168.1 | FTLQLRRR-----                                               | 465 |
| EHK83749.1 | LRVRLSPA-----                                               | 441 |
| EJI96173.1 | FTLQLRRR-----                                               | 465 |
| ABI79384.1 | LKLAMRPRGKG-----                                            | 497 |
| CAR47816.1 | LRLVMRPRKR-----                                             | 498 |
| AEK26937.1 | LRVRLSPA-----                                               | 473 |
| ABE39056.1 | FKIKVRPRSDKDRGDFVAAG-ASQV-----STPALAQAAPRARP                | 493 |
| ABD08340.1 | FKIKVRPRSDKDRATRIASG-VSHS-----VAP--APAAPRARP                | 490 |
| CAM03474.1 | LTLAVRARTAADRVTNRLALPVGLP-----SAAPGEP--ADAARRPGRV           | 489 |
| EJF54063.1 | YFLKFKKRPGFKPVEDG---PKVRPSQ---NLQLK-----GN-----KQVFV        | 498 |
| AFC23737.1 | YFLKFKKRPGFKPVENG---PKVPASQ---SLKLK-----GG-----KQIYV        | 486 |
| ADG98903.1 | LRLRLHTRSR-----                                             | 471 |
| EGI54680.1 | LHIHARRRDGLVARPRS-TAQDAPTRP-----LAA-AS---APSL               | 481 |
| AEW97204.1 | FTLKLARRTSADRVRTVASR-----AAEGTA--QDAGLPTTA                  | 502 |
| CAJ88567.1 | LRLRLERRAGSGRA-----GTGPD-----                               | 495 |
| BAC68285.1 | FELNVRARQEHERTVFGAADL--QT-----DDTQAQAAVS                    | 487 |
| BAC75137.1 | LRLRLDRRVPAVEDVPPVAN-----                                   | 488 |
| EDY51256.1 | FTLVVVRREESERRAATVSRETAERA-----GAMG---P-SGTTGGPGATGTAVPAGLR | 490 |
| EFG07822.1 | FTLVVVRREESERRAATVSRETAERA-----GAMG---P-SGTTGGPGATGTAVPAGLR | 522 |
| EHN78335.1 | LRLHLDRRTAAPASSPPHPDGAGAA-----                              | 504 |
| CAB66201.1 | LRLHLVRRTAAPAPGRR--TAAPG-----                               | 506 |
| EGG48117.1 | LRLGLERREAPVPVRASPP-----                                    | 502 |
| EFL20831.1 | FTLDLVRRTAAEWRRPAAVT-SAP-----AALERPAARR                     | 494 |

|            |                                                   |     |
|------------|---------------------------------------------------|-----|
| EFL28515.1 | LTLRLIPRTTEERAVGA-----A-----AVATSAP--ARDASLPTRV   | 490 |
| AEY93311.1 | LRLRLERRPALTKADEGRPAGARGSVR-----G-----A-A-----    | 503 |
| AEY93321.1 | FTLTLTPRTPADRVHAPLPGAAAAP-----A---AGT--PAPDALPARV | 492 |
| EFD71156.1 | LRLHLVRRRTAAAPAPGRR--TAAPG-----                   | 508 |
| CBG67789.1 | FTLRLARRTAGERRLPLVASDRAP-----AGEAPPVRR            | 490 |
| CBG68112.1 | LRLRVRRRAGAGTDAPRTPSS-----                        | 495 |
| EFL10082.1 | FTVRPRLRERAAVLTS-----                             | 501 |
| EFF88741.1 | FTIKPARRSSGERRTPAIDASTAA-----ATATRDGSTVRR         | 491 |
| EDY58112.1 | LRLHLERRAGRVTVAAPEADP-----                        | 487 |
| EFL36674.1 | LRLRPERRSAVR-----                                 | 495 |
| EFL36680.1 | FTLALAPRTCADRVHTPLPGAIQAQ-----D---AES--AEPQGLPARV | 542 |
| EFE65335.1 | LRLRPERRTAPAVPRTRRADGDAAS-----                    | 496 |
| EGX54696.1 | LRLRPARRAPAAAAPSGA-DAPGP-----                     | 491 |
| ACZ89135.1 | LRIRARVRQAVERAAPAP-E-----PSA-PPQDRP-VT            | 481 |
| ABD83817.1 | FKIKVRPRSGHDRTVHAEAA-TAAV-----ATGAALPRARPRP       | 493 |
| ADU39615.1 | FKIKALLRDPASRPRGNGET-TAAP-----DAPAKPAARKPQAA      | 492 |
| EJL72014.1 | FKIKALLRDPATRPRGNMSDAAAAP-----VQPTQPAQRKQAAA      | 493 |

|                        |                                                       |     |
|------------------------|-------------------------------------------------------|-----|
| sp P14779.2 CPXB_PRIM2 | AHNTPLLVLYGSNMGTAEGTARDLADIAMSKGFAPQ-VATLDSHA-----GN  | 523 |
| ADF40088.1             | AHNTPLLVLYGSNMGTAEGTARDLADIAMSKGFAPQ-VATLDSHA-----GN  | 523 |
| ADE70259.1             | AHNTPLLVLYGSNMGTAEGTARDLADIAMSKGFAPQ-VATLDSHA-----GN  | 523 |
| AEN88827.1             | AHNTPLLVLYGSNMGTAEGTARDLADIAMSKGFAPQ-VATLDSHA-----GN  | 523 |
| KFN05180.1             | AHNTPLLVLYGSNMGTAEGTARDLADIAMSKGFAPQ-VATLDSHA-----GN  | 523 |
| ACZ37122.1             | AHNTPLLVLYGSNMGTAEGTARDLADIAMSKGFAPQ-VATLDSHA-----GN  | 523 |
| ADA57055.1             | AHNTPLLVLYGSNMGTAEGTARDLADIAMSKGFAPQ-VATLDSHA-----GN  | 523 |
| ADA57058.1             | AHNTPLLVLYGSNMGTAEGTARDLADIAMSKGFAPQ-VATLDSHA-----GN  | 523 |
| ADA57059.1             | AHNTPLLVLYGSNMGTAEGTARDLADIAMSKGFAPQ-VATLDSHA-----GN  | 523 |
| ADA57061.1             | AHNTPLLVLYGSNMGTAEGTARDLADIAMSKGFAPR-VATLDSHA-----GN  | 523 |
| ADA57062.1             | AHNTPLLVLYGSNMGTAEGTARDLADIAMSKGFAPQ-VATLDSHA-----GN  | 523 |
| ADA57068.1             | AHNTPLLVLYGSNMGTAEGTARDLADIAMSKGFAPQ-VATLDSHA-----GN  | 523 |
| AAT62301.1             | ADNLSLLVLYGSDTGVAEGLARELADTASLEGVQTE-VVALNDRI-----GS  | 536 |
| AAM54108.1             | RHGTPHVFYGSNGGSGEGLARTIAGDGAARGWATS-VAPLDDAV-----RA   | 528 |
| EFQ83738.1             | -----ESTC-----                                        | 488 |
| EFL88452.1             | KHGGKVTIAFGSNLGTTEEIARDMARSANETNGFDVK-LKTLDELV-----GN | 534 |
| BAF89518.1             | AGGRPMRVLYGSNMGGCRDIALSLAQQAGARGFAAT-VAELDEQVG-----QP | 626 |
| CBI43648.1             | SHGTPLLILYGSNLGTAEGIAEELADIGRSKGFSSSE-TGPLDDYA-----GK | 526 |
| AEB22839.1             | LDNRPLLLIYGSNTGTAEGVAVELADTAGMHGVRTE-TAPLNDRI-----GK  | 533 |
| EDT22025.1             | ADNLSLLVLYGSDTGVAEGLARELADTASLEGVQTE-VVALNDRI-----GS  | 536 |
| AFH84458.1             | ADNLSLLVLYGSDTGVAEGLARELADTASLEGVQTE-VVALNDRI-----GS  | 544 |
| ADP31197.1             | VNNRPLLVLYGSDTGTAEGVARELADTASMHGVRTE-VVALNDQI-----GK  | 533 |
| ACP19384.1             | ADNLSLLVLYGSDTGVAEGLARELADTASLEGVQTE-VVALNDRI-----GS  | 536 |
| ADL27534.1             | ADNLSLLVLYGSDTGVAEGLARELADTASLEGVQTE-VVALNDRI-----GS  | 536 |
| ACO29732.1             | ADNLSLLVLYGSDTGVAEGLARELADTASLEGVQTE-VVALNDRI-----GS  | 536 |
| EDX65100.1             | ADNLSLLVLYGSDTGVAEGLARELADTASLEGVQTE-VVALNDRI-----GS  | 536 |
| EEK61456.1             | ADNLSLLVLYGSDTGVAEGLARELADTASLEGVQTE-VVALNDRI-----GS  | 536 |
| EEL16232.1             | ADNLSLLVLYGSDTGVAEGLARELADTASLEGVQTE-VVALNDRI-----GS  | 544 |
| EDZ53094.1             | ADNLSLLVLYGSDTGVAEGLARELADTASLEGVQTE-VVALNDRI-----GS  | 536 |
| EEL81346.1             | ADNLSLLVLYGSDTGVAEGLARELADTASLEGVQTE-VVALNDRI-----GS  | 550 |
| EEL87105.1             | ADNLSLLVLYGSDTGVAEGLARELADTASLEGVQTE-VVALNDRI-----GS  | 550 |
| EEL75761.1             | ADNLSLLVLYGSDTGVAEGLARELADTASLEGVQTE-VVALNDRI-----GS  | 477 |
| ACK88541.1             | ADNLSLLVLYGSDTGVAEGLARELADTASLEGVQTE-VVALNDRI-----GS  | 536 |
| EJQ05303.1             | ADNLSLLVLYGSDTGVAEGLARELADTASLEGVQTE-VVALNDRI-----GS  | 536 |
| EEK50040.1             | ADNLSLLVLYGSDTGVAEGLARELADTASLEGVQTE-VVALNDRI-----GS  | 536 |
| AAS42149.1             | ADNLSLLVLYGSDTGVAEGLARELADTASLEGVQTE-VVALNDRI-----GS  | 536 |
| AAP10153.1             | ADNLSLLVLYGSDTGVAEGLARELADTASLEGVQTE-VVALNDRI-----GS  | 536 |
| EEK83466.1             | ADNLSLLVLYGSDTGVAEGLARELADTASLEGVQTE-VVALNDRI-----GS  | 544 |

|            |                                                        |     |
|------------|--------------------------------------------------------|-----|
| ACK63698.1 | ADNLSLLVLYGSDTGVAEGIARELADTASLEGVRTE-VVALNDQI-----GS   | 477 |
| EJS57156.1 | ADNLSLLVLYGSDTGVAEGIARELADTASLEGVQTE-VVALNDRI-----GS   | 536 |
| EJS56605.1 | ADNLSLLVLYGSDTGVAEGIARELADTASLEGVQTE-VVALNDRI-----GS   | 536 |
| EJS68951.1 | LNNRPLLVLVLYGSDTGTAEGVARELADTASLHGVRTE-VSPLNDRI-----GN | 535 |
| EJQ10567.1 | ADNLSLLVLYGSDTGVAEGIARELADTASLEGVQTE-VVALNDRI-----GS   | 536 |
| EJQ13433.1 | ADNLSLLVLYGSDTGVAEGIARELADTASLEGVQTE-VVALNERI-----GS   | 536 |
| EJQ20399.1 | ADNLSLLVLYGSDTGVAEGIARELADTASLEGVRTE-VVALNDRI-----GS   | 536 |
| EJQ30236.1 | ADNLSLLVLYGSDTGVAEGIARELADTASLEGVQTE-VVALNDRI-----GS   | 536 |
| EJQ51278.1 | LNNRPLLVLVLYGSDTGTAEGVARELADTASLHGVRTE-VSPLNDRM-----GN | 535 |
| EEL10858.1 | ADNLSLLVLYGSDTGVAEGIARELADTASLEGVQTE-VVALNDRI-----GS   | 536 |
| EEL05393.1 | ADNLSLLVLYGSDTGVAEGIARELADTASLEGVQTE-VVALNDRI-----GS   | 550 |
| EEK94080.1 | ADNLSLLVLYGSDTGVAEGIARELADTASLEGVQTE-VVALNDRI-----GS   | 539 |
| EEK99882.1 | ADNLSLLVLYGSDTGVAEGIARELADTASLEGVQTE-VAALNDRI-----GS   | 539 |
| EEK55784.1 | ADNLSLLVLYGSDTGVAEGIARELADTASLEGVQTE-VVALNDRI-----GS   | 544 |
| ADK05784.1 | ADNLSLLVLYGSDTGVAEGIARELADTASLEGVQTE-VAALNDRI-----GS   | 536 |
| AAU17340.1 | ADNLSLLVLYGSDTGVAEGIARELADTASLEGVQTE-VAALNDRI-----GS   | 536 |
| EEL64394.1 | ADNLSLLVLYGSDTGVAEGIARELADTASLEGVQTE-VVALNDRI-----GS   | 536 |
| AEW56259.1 | ADNLSLLVLYGSDTGVAEGIARELADTASLEGVQTE-VVALNDRI-----GS   | 536 |
| AFQ11690.1 | ADNLSLLVLYGSDTGVAEGIARELADTASLEGVQTE-VAALNDRI-----GS   | 536 |
| EAL16831.1 | ADNLSLLVLYGSDTGVAEGIARELADTASLEGVQTE-VAALNDRI-----GS   | 536 |
| ACK94296.1 | ADNLSLLVLYGSDTGVAEGIARELADTASLEGVQTE-VVALNDRI-----GS   | 536 |
| EDZ58760.1 | ADNLSLLVLYGSDTGVAEGIARELADTASLEGVQTE-VAALNDRI-----GS   | 536 |
| EJV84218.1 | ADNLSLLVLYGSDTGVAEGIARELADTASLEGVQTE-VVALNDRI-----GS   | 536 |
| EJQ69212.1 | ADNLSLLVLYGSDTGVAEGIARELADTASLEGVQTE-VVALNDRI-----GS   | 536 |
| EJQ80339.1 | ADNLSLLVLYGSDTGVAEGIARELADTASLEGVQTE-VVALNDRI-----GS   | 536 |
| EJV81602.1 | ADNLSLLVLYGSDTGVAEGIARELADTASLEGVQTE-VVALNDRI-----GS   | 536 |
| EJQ95474.1 | TDNLSLLVLYGSDTGVAEGIARELADTASLEGVQTE-VAALNDRI-----GS   | 536 |
| EEK44229.1 | ADNLSLLVLYGSDTGVAEGIARELADTASLEGVQTE-VAALNDRI-----GS   | 544 |
| EEK88560.1 | ADNLSLLVLYGSDTGVAEGIARELADTASLEGVQTE-VVALNDRI-----GS   | 536 |
| EJR07451.1 | ADNLSLLVLYGSDTGVAEGIARELADTASLEGVQTE-VVALNDRI-----GS   | 533 |
| EJR16542.1 | ADNLSLLVLYGSDTGVAEGIARELADTASLEGVQTE-VAALNDRI-----GS   | 536 |
| BAL18840.1 | ADNLSLLVLYGSDTGVAEGIARELADTASLEGVQTE-VAALNDRI-----GS   | 536 |
| EDX69960.1 | ADNLSLLVLYGSDTGVAEGIARELADTASLEGVQTE-VTALNDRI-----GS   | 536 |
| ACM13462.1 | ADNLSLLVLYGSDTGVAEGIARELADTASLEGVQTE-VAALNDRI-----GS   | 536 |
| EEK75631.1 | ADNLSLLVLYGSDTGVAEGIARELADTASLEGVQTE-VAALNDRI-----GS   | 536 |
| EEL25491.1 | ADNLSLLVLYGSDTGVAEGIARELADTASLEGVQTE-VVALNDRI-----GS   | 477 |
| EEL21990.1 | ADNLSLLVLYGSDTGVAEGIARELADTASLEGVQTE-VVALNERI-----GS   | 544 |
| EEL33825.1 | ADNLSLLVLYGSDTGVAEGIARELADTASLEGVQTE-VVALNERI-----GS   | 544 |

|                        |                                                        |     |
|------------------------|--------------------------------------------------------|-----|
| EEL44933.1             | ADNLSLLVLYGSDTGVAEGIAARELADTASLEGVQTE-VAAALNDRI-----GS | 544 |
| EEL50167.1             | LNNRLLLVLVLYGSDTGTAEGVARELADTASLHGVRTE-VSPLNDRI-----GN | 614 |
| EJR22930.1             | ADNLSLLVLYGSDTGVAEGIAARELADTASLEGVQTE-VVALNDRI-----GS  | 536 |
| EJP91231.1             | ADNLSLLVLYGSDTGVAEGIAARELADTASLEGVQTE-VVALNDRI-----GS  | 536 |
| EJR37623.1             | ADNLSLLVLYGSDTGVAEGIAARELADTASLEGVQTE-VVALNDRI-----GS  | 536 |
| EJR50635.1             | ADNLSLLVLYGSDTGVAEGIAARELADTASLEGVQTE-VAAALNDRI-----GS | 536 |
| EJR64551.1             | ADNLSLLVLYGSDTGVAEGIAARELADTASLEGVQTE-VVALNERI-----GS  | 536 |
| EJR75620.1             | ADNLSLLVLYGSDTGVAEGIAARELADTASLEGVQTE-VVALNDRI-----GS  | 536 |
| EJR82049.1             | ADNLSLLVLYGSDTGVAEGIAARELADTASLEGVQTE-VVALNDRI-----GS  | 536 |
| EJR83659.1             | ADNLSLLVLYGSDTGVAEGIAARELADTASLEGVQTE-VVALNDRI-----GS  | 536 |
| EJR91135.1             | AKYKTLVVLYGSNMGTAEHIAKEIVDFARLQGIQSE-LSALNDWS-----SN   | 532 |
| EJR97241.1             | ADNLSLLVLYGSDTGVAEGIAARELADTASLEGVQTE-VVALNDRI-----GS  | 536 |
| EJS05852.1             | ADNLSLLVLYGSDTGVAEGIAARELADTASLEGVQTE-VVALNDRI-----GS  | 536 |
| EDX58768.1             | ADNLSLLVLYGSDTGVAEGIAARELADTASLEGVQTE-VAAALNDRI-----GS | 536 |
| AAU24352.1             | THGTPLLVLYGSNLGTAEEIAKELAAEAREQGFHSR-TAELDQYA-----GA   | 530 |
| ABY44122.1             | ADNLSLLVLYGSDTGVAEGIAARELADTASLEGVQTE-VVALNDRI-----GS  | 536 |
| EDW23201.1             | SHGTPLLVLYGSNLGTAQQIANELAAEGKAKGFDVT-TAPLDDYT-----RQ   | 524 |
| ABV62358.1             | SHGTPLLVLYGSNLGTAQQIANELAAEDGKAKGFDMT-TAPLDDYA-----RQ  | 524 |
| EIF12263.1             | LDNRPLLILYGSNTGTAEGVARELADTAGMHGVRTE-TAPLNDRI-----GK   | 532 |
| EIF14027.1             | SHGTPLLILYGSNLGTAEGIAEELADIGRSKGFSTE-TGPLDDYA-----GK   | 526 |
| EHL75405.1             | ADNLSLLVLYGSDTGVAEGIAARELADTASLEGVQTE-VVALNDRI-----GS  | 536 |
| EJD67577.1             | LDNRPLLILYGSNTGTAEGVARELADTAGMHGVRTE-TAPLNDRI-----GK   | 532 |
| EJD68347.1             | SHGTPLLILYGSNLGTAEGIAEELADIGRSKGFSTE-TGPLDDYA-----GK   | 526 |
| EFV73436.1             | THGTPLLVLYGSNLGTAEEIAKELAAEAREQGFHSR-TAELDQYA-----GA   | 544 |
| CBY93692.1             | ADNLSLLVLYGSDTGVAEGIAARELADTASLEGVQTE-VAAALNDRI-----GS | 536 |
| AFI27355.1             | LNNRPLLVLVLYGSDTGTAEGVARELADTASLHGVRTE-VSPLNDQI-----GK | 533 |
| AFI29229.1             | KHGTPLLVLVLYGSNLGTAEGIAGELAAQGRQMGTAE-TAPLDDYI-----GK  | 526 |
| EIL85422.1             | SHGTPLLVLYGSNLGTAKQMANEFAEDGKAKGFDVT-TAPLDDYT-----RK   | 524 |
| ADV93500.1             | KHGTPLLVLVLYGSNLGTAEGIAGELAAQGRQMGTAE-TAPLDDYI-----GK  | 526 |
| ADV95715.1             | LNNRPLLVLVLYGSDTGTAEGVARELADTASLHGVRTE-TAPLNDRI-----GK | 533 |
| BAI84248.1             | LNNRPLLVLVLYGSDTGTAEGVARELADTASLHDVRTE-TAPLNDRI-----GK | 533 |
| EFG90288.1             | KHGTPLLVLVLYGSNLGTAEGIAGELAAAYGRQMGTAE-TAPLDDYI-----GK | 526 |
| EFG91781.1             | LNNRPLLVLVLYGSDTGTAEGVARELADTASLHGVRTE-VAPLNDRI-----GK | 533 |
| AEP85668.1             | LNNRPLLVLVLYGSDTGTAEGVARELADTASLHGVRTE-VAPLNDRI-----GK | 533 |
| AEP87558.1             | KHGTPLLVLVLYGSNLGTAEGIAGELAAAYGRQMGTAE-TAPLDDYI-----GK | 526 |
| sp 008336.1 CYPB_BACSU | KHGTPLLVLVLYGSNLGTAEGIAGELAAQGRQMGTAE-TAPLDDYI-----GK  | 526 |
| sp 008394.1 CYPD_BACSU | LNNRPLLVLVLYGSDTGTAEGVARELADTASLHGVRTE-TAPLNDRI-----GK | 533 |
| AEP89812.1             | LNNRLLLVLVLYGSDTGTAEGVARELADTASLHGVRTE-TAPLNDRI-----GK | 533 |

|            |                                                         |     |
|------------|---------------------------------------------------------|-----|
| AEP91702.1 | KHGTPLLVLYGSNLGTAEGIAGELAAQGRQMGFTAE-TAPLDDYI-----GK    | 526 |
| EHA31094.1 | KHGTPLLVLYGSNLGTAEGIAGELAAQGRQMGFTAE-TAPLDDYI-----GK    | 528 |
| ADH07708.1 | ADNLSLLVLYGSDTGVAEGIARELADTASLEGVQTE-VVALNDRI-----GS    | 536 |
| EEM28177.1 | ADNLSLLVLYGSDTGVAEGIARELADTASLEGVRTE-VVALNDRI-----GS    | 536 |
| AFQ14162.1 | ADNLSLLVLYGSDTGVAEGIARELADTASLEGVQTE-VVALNDRI-----GS    | 536 |
| EEM95517.1 | ADNLSLLVLYGSDTGVAEGIARELADTAGLEGVQTE-VAALNDRI-----GS    | 536 |
| EEN02344.1 | ADNLSLLVLYGSDTGVAEGIARELADTASLEGVQTE-VVALNDRI-----GS    | 536 |
| AFU13781.1 | ADNLSLLVLYGSDTGVAEGIARELADTASLEGVQTE-VVALNERI-----GS    | 544 |
| EEM70897.1 | ADNLSLLVLYGSDTGVAEGIARELADTASLEGVQTE-VVALNDRI-----GS    | 544 |
| ADY22413.1 | ADNLSLLVLYGSDTGVAEGIARELADTASLEGVQTE-VAALNDRI-----GS    | 536 |
| EEM82895.1 | ADNLSLLVLYGSDTGVAEGIARELADTASLEGVQTE-VVALNDRI-----GS    | 536 |
| EEM52818.1 | ADNLSLLVLYGSDTGVAEGIARELADTASLEGVRTE-VVALNDRI-----GS    | 536 |
| EEM59126.1 | ADNLSLLVLYGSDTGVAEGIARELADTASLEGVQTE-VAALNDRI-----GS    | 544 |
| EEM47193.1 | ADNLSLLVLYGSDTGVAEGIARELADTASLEGVQTE-VVALNDRI-----GS    | 477 |
| EEM76899.1 | ADNLSLLVLYGSDTGVAEGIARELADTASLEGVQTE-VVALNDRI-----GS    | 544 |
| EEM88909.1 | ADNLSLLVLYGSDTGVAEGIARELADTASLEGVQTE-VAALNDRI-----GG    | 544 |
| EEM38196.1 | ADNLSLLVLYGSDTGVAEGIARELADTASLEGVQTE-VVALNDRI-----GS    | 536 |
| EEM21858.1 | ADNLSLLVLYGSDTGVAEGIARELADTASLEGVQTE-VAALNDRI-----GS    | 539 |
| ABK86139.1 | ADNLSLLVLYGSDTGVAEGIARELADTASLEGVQTE-VVALNDRI-----GS    | 544 |
| EJQ37805.1 | ADNLSLLVLYGSDTGVAEGIARELADTASLEGVQTE-VVALNERI-----GS    | 536 |
| CCF04242.1 | LDNRPLLILYGSDTGTAEGVARELADTAGMHGVRTE-TAPLNDRI-----GK    | 532 |
| CCF05972.1 | SHGTPLLILYGSNLGTAEGIAEELADIGRSKGFSTE-TGPLNDYA-----GK    | 526 |
| ABS73124.1 | LDNRPLLILYGSDTGTAEGVARELADTAGMHGVRTE-TAPLNDRI-----GK    | 532 |
| ABS74786.1 | SHGTPLLILYGSNLGTAEGIAEELADIGRSKGFSTE-SGPLDDYA-----GK    | 526 |
| EKE46398.1 | LDNRPLLILYGSDTGTAEGVARELADTAGMHGVRTE-TAPLNDRI-----GK    | 532 |
| EKE48022.1 | SHGTPLLILYGSNLGTAEGIAEELADIGRSKGFSTE-TGPLDDYA-----GK    | 526 |
| CCG48683.1 | LDNRPLLILYGSDTGTAEGVARELADTAGMHGVRTE-TAPLNDRI-----GK    | 532 |
| AFJ60789.1 | LDNRPLLILYGSDTGTAEGVARELADTAGMHGVRTE-TAPLNDRI-----GK    | 539 |
| AFJ62808.1 | SHGTPLLILYGSNLGTAEGIAEELADIGRSKGFSTE-TGPLDDYA-----GK    | 526 |
| EEK66903.1 | ADNLSLLVLYGSDTGVAEGIARELADTASLEGVQTE-VVALNDRI-----GS    | 550 |
| EJQ52935.1 | ADNLSLLVLYGSDTGVAEGIARELADTASLEGVQTE-VVALNDRI-----GS    | 536 |
| EJS69574.1 | ADNLSLLVLYGSDTGVAEGIARELADTASLEGVQTE-VVALNDRI-----GS    | 536 |
| EJV63294.1 | ADNLSLLVLYGSDTGVAEGIARELADTASLEGVQTE-VVALNDRI-----GS    | 536 |
| EKF35778.1 | SHGTPLLILYGSNLGTAKQMANEFAEDGQAKGFDVT-TAPLDDYT-----GK    | 524 |
| EGP08506.1 | GHNTPLLVLVLYGSNLGTAEEELATRVADLAEVNGFDTK-LGTLDEYA-----GH | 538 |
| BAL78328.1 | GHNTPMLVLVLYGSNLGTAEEELATRMADLAEINGFAVH-LGPLDDYV-----GK | 538 |
| BAC48147.1 | GHNTPMLVLVLYGSNLGTAEEELATRMADLAEINGFAVH-LGALDEYV-----GK | 539 |
| BAL12135.1 | GHNTPMLVLVLYGSNLGTAEEELATRMADLAEINGFAVH-LGPLDDYV-----GK | 539 |

|            |                                                        |     |
|------------|--------------------------------------------------------|-----|
| CCE00185.1 | GHNTPLLVLYGSNLGTAEDMATRVADLAEVNGFSTR-LAPLDDFA-----GQ   | 542 |
| EIG57609.1 | GHNTPLLVLYGSNLGTAEEELATRMADLAEINGFAVH-LGPLDDYV-----GK  | 538 |
| EHR02046.1 | GHNTPLLVLYGSNLGTAEEELATRMADLAEINGFAVH-LGPLDDYV-----GK  | 538 |
| EJN11211.1 | GHNTPLLVLYGSNLGTAEEELATRMADLAEINGFAVH-LGSLDDYV-----GK  | 539 |
| CCF15606.1 | AHNTPLLVLYGSNLGTAEGIARELAEDARFQGFKSE-VAPLNDYL-----GK   | 471 |
| CCF12687.1 | VNHVSLLLILYGSNLGTAERTARELSTIAGSLGIRSE-MAPLDDWL-----GK  | 535 |
| ABB05850.1 | EDLSNLLVLFGGNTGSAESFARRIAGDASRHGFHAT-CAPLDDFA-----GK   | 537 |
| EHP43606.1 | GNGQPLSVLCGSSLGTARELAEQIHAGALAAGFAAT-LRDLDEAV-----GA   | 556 |
| ABF10339.1 | GHGQAMTVLCASSLGTARELAEQIHAGAIAGFDAT-LADLDDAV-----GV    | 531 |
| CAJ95800.1 | GRGRTLAVLCGSSLGTARELAEQVHAGALAAGFDAT-LRDLDDVA-----DA   | 558 |
| AEI79937.1 | GGGRPLAVLCGSSLGTARELAEQVHAGALAAGFDAT-LRDLDDVA-----DA   | 558 |
| AFD27790.1 | AEGIQLLVLYGSESGASEGFARQIAGDAAHGCQAT-VHSLDEQAG-----TGS  | 534 |
| ABC62112.1 | SHGTPLLVLYGSNLGSSEGFARELAQRGEFSGFDVT-MAPLDAHV-----AK   | 532 |
| EAQ27850.1 | KHDTPLLVLYGSNLGSSESFAREVAQKGEFSGFEVE-MAPLDDYV-----GK   | 533 |
| EIT84377.1 | GKPASLLVLYGSEMGTAEGMAREIAETASQRGIKST-VAPLSAGI-----DA   | 522 |
| CCG43686.1 | AHLTPLLVLYGSNMGTAEGVARELAQTGKLGQFDVK-TAPLNQYT-----SA   | 528 |
| ABX05160.1 | QHNIPLLVLYGSNSGSSEAFARRIASDGEARGYQTS-VAALNNYV-----NK   | 527 |
| BAJ96920.1 | EANTPLLVLYGSNSGSSESFASRIASESKLNGYYST-LATLDEYV-----GH   | 530 |
| GAB96874.1 | QHGTVPVRIIFGSNAGTSEAFQAQQVAQQATRLGYAPR-VTSLDEGV-----DD | 585 |
| EFH80345.1 | QHHTPLLVLHGSNMGTSEELAHTIMEDGKLRGFDAQ-VASLDDYT-----RK   | 540 |
| EFH88481.1 | AQKTTLLALYGSNTGTAEVVAHRIAEAGTARGFEAT-VGELDNYV-----DK   | 541 |
| EAW32450.1 | DHATPLLLILHGSNMGSAQQIAARLAEEGESVGFVVS-SGSLDEYT-----NR  | 533 |
| EIZ82104.1 | EATTPLLVLYGSNTGSCQAFARIAGEAAGQGYAAT-AAPMDDYV-----ER    | 530 |
| AEV70722.1 | KKGTTLAVLFGSNLGTCRALATQLAEEATDMGCTVT-VGPLVDAVG-----G-  | 525 |
| EFC41452.1 | ESKGPLLVLYGSNSGTCEFSASMLHQDAKSKGFDCK-VGRLNTFT-----GN   | 562 |
| ACV78954.1 | GHQQLVVAASSDGGTARHLGYDLAHEAVDAGDAAD-GVELNALV-----DR    | 551 |
| ACV78964.1 | GHGTPLTVLFGSNLGTAEGIATKLAREGTERGFVDT-LAPLDEHV-----GQ   | 535 |
| ACV81379.1 | AHGTPLLVLFGSNLGTAEGIANRLGREGADRGYAVT-VAALDDHG-----PD   | 538 |
| EIZ78677.1 | GAATPLLVLYGSNSGSSEAFAGRIARDAQAQGYAAL-AAPLDDYV-----ER   | 531 |
| EJW15291.1 | PHNIPLLVLYGSNLGTAEGIARELAEKGRQLGFKSK-VAPLNDYA-----AD   | 530 |
| EJW16173.1 | AHDTPLLVLYGSNLGTAEGIARELADEGRYQGFSSQ-VAPLSDYV-----GK   | 533 |
| EHQ58913.1 | RHDTPLLVLYGSDLGTAEGIAREMADTARYQGFQSK-VAPLDDYA-----GK   | 531 |
| EHQ59900.1 | AHNTPLLVLYGSNLGTAEGIARELADTARYQGFSE-VAPLNERV-----GK    | 530 |
| EHB66924.1 | AHHTPLLLALYGSNLGTAEGIAREVADAAKHLGFDSQ-VGTLDDFA-----GR  | 531 |
| AFH60445.1 | KHNTPLLVLYGSNLGTAEGIARELADAARYQGFSSQ-TAPLDEHV-----GS   | 530 |
| AEI42011.1 | KHNTPLLVLYGSNLGTAEGIARELADAARYQGFSSQ-TAPLDEHV-----GS   | 530 |
| ADO57681.1 | KHDTSLLSLYGSNLGTAEGLAGELADLGRNWGFKSS-IATLNDHV-----DH   | 529 |
| EGG32133.1 | AHHTPLLLALYGSNLGTAEGIAREVADAAKHQGFDSQ-VGTLDEYA-----GK  | 533 |

|            |                                                                 |     |
|------------|-----------------------------------------------------------------|-----|
| EGL17662.1 | AHNTPLLVLVLYGSNLGTAEGIAARELADA AKYQGFRPE-VASMNDYA-----GK        | 532 |
| ACX65034.1 | AHHTPLLALYGSNLGTAEGIAREVADA AKHQGFDSQ-VGTLDEYA-----GK           | 533 |
| ACT11327.1 | QDLIPLLVLHGGNTGSSEAFANRIAADA QRYGFAST-LAALDDYA-----EK           | 534 |
| AEA28016.1 | RHGTPLTVLFGSNLGTAEGIATRIA QDGADRFAVT-LGALDDHV-----AD            | 542 |
| EFP68091.1 | GGGEPMHVLYGGSLGTCQDIAEQ LAATASRAGFDAK-VAPLDAIA-----DA           | 544 |
| EGY61507.1 | GGGEPMHVLYGGSLGTCQDIAEQ LAATASRAGFDAK-VAPLDAIA-----DA           | 544 |
| EIE85788.1 | VELPPITFLYGTQTGT AQDYATILSEQARSFGFTQVTLCEMDRWNVLADGKFISNDDDDK   | 640 |
| EIE92534.1 | VELPPITFLYGTQTGT AQDYATV LASQAKGFGFKNTTLCCEMDKWKVLADGKFISDNKDKK | 643 |
| BAE46296.1 | -----                                                           | 510 |
| BAH31604.1 | -----                                                           | 466 |
| EEN84644.1 | -----                                                           | 466 |
| EEN88978.1 | -----                                                           | 550 |
| ABG96413.1 | -----                                                           | 498 |
| BAH52971.1 | -----                                                           | 465 |
| EHI44575.1 | -----                                                           | 500 |
| EID73168.1 | -----                                                           | 465 |
| EHK83749.1 | -----                                                           | 441 |
| EJI96173.1 | -----                                                           | 465 |
| ABI79384.1 | -----                                                           | 497 |
| CAR47816.1 | -----                                                           | 498 |
| AEK26937.1 | -----                                                           | 473 |
| ABE39056.1 | DHNTPLLVLVLYGSNLGTAEE LATRVADLAELNGFSTR-LGALDQYV-----GH         | 539 |
| ABD08340.1 | GHNTPLLVLVLYGSNLGTAEE LAHRVADLADLNGFATR-LGALDQYV-----GQ         | 536 |
| CAM03474.1 | LPGTGLLLLHGSNYGTCRDFAAQLALAA GELGCDTA-VAPLDEYA-----GN           | 535 |
| EJF54063.1 | QNKPLLYLAYGSNMGSSKKFIQQLAETAQALGYQPS-VHSLNETKA-----LM           | 545 |
| AFC23737.1 | QNKPLLYLAYGSNMGSSKKFIQQLAETAQALGYQPS-VHSLNETKA-----LM           | 533 |
| ADG98903.1 | -----                                                           | 471 |
| EGI54680.1 | GDNGSLLVLVLYGSNTGTSEAF AQRI GADAAAQGYAAT-VAPLDDYA-----SG        | 527 |
| AEW97204.1 | RPGTTLTVLHGSNLGACREFAAGLADLGERCGFETT-VAPL DAYRA-----GD          | 549 |
| CAJ88567.1 | -----RAAVAE-----                                                | 501 |
| BAC68285.1 | GVGVNLT VAYGSSSLGSCEDLARTIADR GERSGFGTT-LVGLDELG-----DN         | 533 |
| BAC75137.1 | -----                                                           | 488 |
| EDY51256.1 | APGTTTLTVLHGSNLGTSRTLAADLADQ GARHGFRTS-LAPLDDAVG-----AL         | 537 |
| EFG07822.1 | APGTTTLTVLHGSNLGTSRTLAADLADQ GARHGFRTS-LAPLDDAVG-----AL         | 569 |
| EHN78335.1 | -----GEQDAG-----                                                | 510 |
| CAB66201.1 | -----AADDAG-----                                                | 512 |
| EGG48117.1 | -----                                                           | 502 |
| EFL20831.1 | NTGTALTLLHGSNLGTCAGITRDLAEDGGERGFTAT-ATPLNEAVG-----KL           | 541 |

|            |                                                       |     |
|------------|-------------------------------------------------------|-----|
| EFL28515.1 | RQDTGALLLFGTNGTGRSFAEDLAAAADGLGCATE-VAPLDRYA-----GG   | 536 |
| AEY93311.1 | -----DAAWARPARDAAADRRHDP-----                         | 524 |
| AEY93321.1 | RPGTRALFLHGSNYGTCRDFAAARLADEAAAVGCATE-VAALDAYK-----DG | 538 |
| EFD71156.1 | -----AADDAG-----                                      | 514 |
| CBG67789.1 | AAGTTLTLLHGSNLGTCAGIARELAEDGEQHGFAPT-VASLDSAAG-----TL | 537 |
| CBG68112.1 | -----                                                 | 495 |
| EFL10082.1 | -----                                                 | 501 |
| EFF88741.1 | ATGTALTLLHGSNLGTCSGMARDLAADGDEHGFTTA-VASLNDYAG-----RL | 538 |
| EDY58112.1 | -----D-----                                           | 488 |
| EFL36674.1 | -----                                                 | 495 |
| EFL36680.1 | RPGTAALFLHGSNYGTCRDFAAQLADEAAAVGCETE-VAPLDAYA-----GG  | 588 |
| EFE65335.1 | -----AARRSSARVG-----                                  | 506 |
| EGX54696.1 | -----                                                 | 491 |
| ACZ89135.1 | AHGTPLLLLYGSNSGASEAFARRVAGDAAARGYAAR-VAPLDEHV-----GR  | 527 |
| ABD83817.1 | GHNTPLLVLYGSNLGTAEDLATRVADLAEVNGFATR-LAPLDDCA-----GQ  | 539 |
| ADU39615.1 | RHGTSLLVLQGSNLGTAEDLARQLAEAGELRGFSTQ-VASLDDYA-----ER  | 538 |
| EJL72014.1 | RHGTSLLVLQGSNLGTAEDLARQLAEAGETRGFSTQ-LASLDDYA-----ER  | 539 |

|                        |                                                               |     |
|------------------------|---------------------------------------------------------------|-----|
| sp P14779.2 CPXB_PRIM2 | LP-REGAVLIVTASYNGHPPDNAKQFVDWLDQAS-----ADEVKGVRYSVFGCGDKNWAT  | 577 |
| ADF40088.1             | LP-REGAVLIVTASYNGHPPDNAKQFVDWLDQAS-----ADEVKGVRYSVFGCGDKNWAT  | 577 |
| ADE70259.1             | LP-REGAVLIVTASYNGHPPDNAKEFVDWLDQAS-----ADEVKGVRYSVFGCGDKNWAT  | 577 |
| AEN88827.1             | LP-REGAVLIVTASYNGHPPDNAKEFVDWLDQAS-----ADEVKGVRYSVFGCGDKNWAT  | 577 |
| KFN05180.1             | LP-REGAVLIVTASYNGHPPDNAKQFVDWLDQAS-----ADEVKGVRYSVFGCGDKNWAT  | 577 |
| ACZ37122.1             | LP-REGAVLIVTASYNGHPPDNAKEFVDWLDQAS-----ADEVKGVRYSVFGCGDKNWAT  | 577 |
| ADA57055.1             | LP-REGAVLIVTASYNGHPPDNAKQFVDWLDQAS-----ADDVKGVRYSVFGCGDKNWAT  | 577 |
| ADA57058.1             | LP-PEGAVLIVTASYNGHPPDNAKEFVDWLDQAS-----ADEVKGVRYSVFGCGDKNWAT  | 577 |
| ADA57059.1             | LP-REGAVLIVTASYNGHPPDNAKQFVDWLDQAS-----ADDVKGVRYSVFGCGDKNWAT  | 577 |
| ADA57061.1             | LP-REGAVLIVTASYNGHPPDNAKEFVDWLDQAS-----ADEVKGVRYSVFGCGDKNWAT  | 577 |
| ADA57062.1             | LP-REGAVLIVTASYNGHPPDNAKQFVDWLDQAS-----ADDVKGVRYSVFGCGDKNWAT  | 577 |
| ADA57068.1             | LP-REGAVLIVTASYNGHPPDNAKEFVDWLDQAS-----ADEVKGVRYSVFGCGDKNWAT  | 577 |
| AAT62301.1             | LP-KEGAVLIVTSSYNGKPPSNAGQFVQWLEELK-----PDELKGVQYAVFGCGDHNWAS  | 590 |
| AAM54108.1             | LP-ASGPVVIVSSSYNGAPPDNAAHFVRWLTQDG-----P-DLSGVDYLVLGCGNLDWSA  | 581 |
| EFQ83738.1             | -----QAGLN AISQTCPSGSDT-----                                  | 505 |
| EFL88452.1             | MP-KEGALLLACASYNGQPPDNAAQFVDWVKE-Q-----PAGSMDGINYALFGCGHSDWSA | 588 |
| BAF89518.1             | WL-TDGPVVIVTSTYNGTTPDNAARFAKWLETAP-----AGVCAGVRHAVLGCGNTQWHQ  | 680 |
| CBI43648.1             | LP-VKGAVVIVTASYNGAPPDNAAGFVKWMETLE-----DQELKGVSYAVFGCGDRNWAA  | 580 |
| AEB22839.1             | LP-KEGALLIITSSYNGKPPSNAGQFVQWLEEVK-----QGELEGVRYAVFGCGDHNWAA  | 587 |
| EDT22025.1             | LP-KEGAVLIVTSSYNGKPPSNAGQFVQWLEELK-----GDELKGVQYAVFGCGDHNWAS  | 590 |
| AFH84458.1             | LP-KEGAVLIVTSSYNGKPPSNAGQFVQWLEELK-----GDELKGVQYAVFGCGDHNWAS  | 598 |
| ADP31197.1             | LP-KEGAVLIVTSSYNGKPPSNAGQFVQWLEELK-----PGELTGVQYAVFGCGDHNWAS  | 587 |
| ACP19384.1             | LP-KEGAVLIVTSSYNGKPPSNAGQFVQWLEELK-----PDELKGVQYAVFGCGDHNWAS  | 590 |
| ADL27534.1             | LP-KEGAVLIVTSSYNGKPPSNAGQFVQWLEELK-----SDELKGVQYAVFGCGDHNWAS  | 590 |
| ACO29732.1             | LP-KEGAVLIVTSSYNGKPPSNAGQFVQWLEELK-----PDELKGVQYAVFGCGDHNWAS  | 590 |
| EDX65100.1             | LP-KEGAVLIVTSSYNGKPPSNAGQFVQWLEELK-----PDELKGVQYAVFGCGDHNWAS  | 590 |
| EEK61456.1             | LP-KEGAVLIVTSSYNGKPPSNAGQFVQWLEELK-----PDELKGVQYAVFGCGDHNWAS  | 590 |
| EEL16232.1             | LP-KEGAVLIVTSSYNGKPPSNAGQFVQWLEELK-----PDELKGVQYAVFGCGDHNWAS  | 598 |
| EDZ53094.1             | LP-KEGAVLIVTSSYNGKPPSNAGQFVQWLEELK-----PDELKGVQYAVFGCGDHNWAS  | 590 |
| EEL81346.1             | LP-KEGAVLIVTSSYNGKPPSNAGQFVQWLEELK-----ADELKGVQYAVFGCGDHNWAS  | 604 |
| EEL87105.1             | LP-KEGAVLIVTSSYNGKPPSNAGQFVQWLEELK-----ADELKGVQYAVFGCGDHNWAS  | 604 |
| EEL75761.1             | LP-KEGAVLIVTSSYNGKPPSNAGQFVQWLEELK-----PDELKGVQYAVFGCGDHNWAS  | 531 |
| ACK88541.1             | LP-KEGAVLIVTSSYNGKPPSNAGQFVQWLEELK-----PDELKGVQYAVFGCGDHNWAS  | 590 |
| EJQ05303.1             | LP-KEGAVLIVTSSYNGKPPSNAGQFVQWLEELK-----PDELKGVQYAVFGCGDHNWAS  | 590 |
| EEK50040.1             | LP-KEGAVLIVTSSYNGKPPSNAGQFVQWLEELK-----PDELKGVQYAVFGCGDHNWAS  | 590 |
| AAS42149.1             | LP-KEGAVLIVTSSYNGKPPSNAGQFVQWLEELK-----PDELKGVQYAVFGCGDHNWAS  | 590 |
| AAP10153.1             | LP-KEGAVLIVTSSYNGKPPSNAGQFVQWLEELK-----PDELKGVQYAVFGCGDHNWAS  | 590 |
| EEK83466.1             | LP-KEGAVLIVTSSYNGKPPSNAGQFVQWLEELK-----PDELKGVQYAVFGCGDHNWAS  | 598 |

|            |                                                              |     |
|------------|--------------------------------------------------------------|-----|
| ACK63698.1 | LP-KEGAVLIVTSSYNGKPPSNAGQFVQWLEELK-----PDELKGVQYAVFGCGDHNWAS | 531 |
| EJS57156.1 | LP-KEGAVLIVTSSYNGKPPSNAGQFVQWLEELK-----PDELKGVQYAVFGCGDHNWAS | 590 |
| EJS56605.1 | LP-KEGAVLIVTSSYNGKPPSNAGQFVQWLEELK-----ADELKGVQYAVFGCGDHNWAS | 590 |
| EJS68951.1 | LP-KEGAILIVTSSYNGKPPSNAGQFVQWLEELQ-----HGELQGVHYAVFGCGDHNWAS | 589 |
| EJQ10567.1 | LP-KEGAVLIVTSSYNGKPPSNAGQFVQWLEELK-----PDELKGVQYAVFGCGDHNWAS | 590 |
| EJQ13433.1 | LP-QEGAVLIVTSSYNGKPPSNAGQFVQWLEELK-----PDELKGVQYAVFGCGDHNWAS | 590 |
| EJQ20399.1 | LP-KEGAVLIVTSSYNGKPPSNAGQFVQWLEELK-----TDELKGVQYAVFGCGDHNWAS | 590 |
| EJQ30236.1 | LP-KEGAVLIVTSSYNGKPPSNAGQFVQWLEELK-----TDELKGVQYAVFGCGDHNWAS | 590 |
| EJQ51278.1 | LP-KEGAILIVTSSYNGKPPSNAGQFVQWLEELQ-----HGELQGVHYAVFGCGDHNWAS | 589 |
| EEL10858.1 | LP-KEGAVLIVTSSYNGKPPSNAGQFVQWLEELK-----PDELKGVQYAVFGCGDHNWAS | 590 |
| EEL05393.1 | LP-KEGAVLIVTSSYNGKPPSNAGQFVQWLEELK-----PDELKGVQYAVFGCGDHNWAS | 604 |
| EEK94080.1 | LP-KEGAVLIVTSSYNGKPPSNAGQFVQWLEELK-----PDELKGVQYAVFGCGDHNWAS | 593 |
| EEK99882.1 | LP-KEGAVLIVTSSYNGKPPSNAGQFVQWLEELK-----PDELKGVQYAVFGCGDHNWAS | 593 |
| EEK55784.1 | LP-KEGAVLIVTSSYNGKPPSNAGQFVQWLEELK-----PDELKGVQYAVFGCGDHNWAS | 598 |
| ADK05784.1 | LP-KEGAVLIVTSSYNGKPPSNAGQFVQWLEELK-----PDELKGVQYAVFGCGDHNWAS | 590 |
| AAU17340.1 | LP-KEGAVLIVTSSYNGKPPSNAGQFVQWLEELK-----GDELKGVQYAVFGCGDHNWAS | 590 |
| EEL64394.1 | LP-KEGAVLIVTSSYNGKPPSNAGQFVQWLEELK-----PDELKGVQYAVFGCGDHNWAS | 590 |
| AEW56259.1 | LP-KEGAVLIVTSSYNGKPPSNAGQFVQWLEELK-----PDELKGVQYAVFGCGDHNWAS | 590 |
| AFQ11690.1 | LP-KEGAVLIVTSSYNGKPPSNAGQFVQWLEELK-----PDELKGVQYAVFGCGDHNWAS | 590 |
| EAL16831.1 | LP-KEGAVLIVTSSYNGKPPSNAGQFVQWLEELK-----PDELKGVQYAVFGCGDHNWAS | 590 |
| ACK94296.1 | LP-KEGAVLIVTSSYNGKPPSNAGQFVQWLEELK-----PDELKGVQYAVFGCGDHNWAS | 590 |
| EDZ58760.1 | LP-KEGAVLIVTSSYNGKPPSNAGQFVQWLEELK-----PDELKGVQYAVFGCGDHNWAS | 590 |
| EJV84218.1 | LP-KEGAVLIVTSSYNGKPPSNAGQFVQWLEELK-----PDELKGVQYAVFGCGDHNWSS | 590 |
| EJQ69212.1 | LP-KEGAVLIVTSSYNGKPPSNAGQFVQWLEELK-----SDELKGVQYAVFGCGDHNWAS | 590 |
| EJQ80339.1 | LP-KEGAVLIVTSSYNGKPPSNAGQFVQWLEELK-----PDELKGVQYAVFGCGDHNWAS | 590 |
| EJV81602.1 | LP-KEGAVLIVTSSYNGKPPSNAGQFVQWLEELK-----PDELKGVQYAVFGCGDHNWAS | 590 |
| EJQ95474.1 | LP-KEGAVLIVTSSYNGKPPSNAGQFVQWLEELK-----PDELKGVQYAVFGCGDHNWAS | 590 |
| EEK44229.1 | LP-KEGAVLIVTSSYNGKPPSNAGQFVQWLEELK-----PDELKGVQYAVFGCGDHNWAS | 598 |
| EEK88560.1 | LP-KEGAVLIVTSSYNGKPPSNAGQFVQWLEELK-----PDELKGVQYAVFGCGDHNWAS | 590 |
| EJR07451.1 | LP-KEGAVLIVTSSYNGKPPSNAGQFVQWLEELK-----PDELKGVQYAVFGCGDHNWAS | 587 |
| EJR16542.1 | LP-KEGAVLIVTSSYNGKPPSNAGQFVQWLEELK-----PDELKGVQYAVFGCGDHNWAS | 590 |
| BAL18840.1 | LP-KEGAVLIVTSSYNGKPPSNAGQFVQWLEELK-----PDELKGVQYAVFGCGDHNWAS | 590 |
| EDX69960.1 | LP-KEGAVLIVTSSYNGKPPSNAGQFVQWLEELK-----PDELKGVQYAVFGCGDHNWAS | 590 |
| ACM13462.1 | LP-KEGAVLIVTSSYNGKPPSNAGQFVQWLEELK-----PDELKGVQYAVFGCGDHNWAS | 590 |
| EEK75631.1 | LP-KEGAVLIVTSSYNGKPPSNAGQFVQWLEELK-----PDELKGVQYAVFGCGDHNWAS | 590 |
| EEL25491.1 | LP-KEGAVLIVTSSYNGKPPSNAGQFVQWLEELK-----PDELKGVQYAVFGCGDHNWAS | 531 |
| EEL21990.1 | LP-KEGAVLIVTSSYNGKPPSNAGQFVQWLEELK-----PDELKGVQYAVFGCGDHNWAS | 598 |
| EEL33825.1 | LP-KEGAVLIVTSSYNGKPPSNAGQFVQWLEELK-----PDELKGVQYAVFGCGDHNWAS | 598 |

|                        |                                                                |     |
|------------------------|----------------------------------------------------------------|-----|
| EEL44933.1             | LP-KEGAVLIVTSSYNGKPPSNAGQFVQWLEELK-----GDELKGVQYAVFGCGDHNWAS   | 598 |
| EEL50167.1             | LP-KEGAILIVTSSYNGKPPSNAGQFVQWLEELQ-----PGELEGVHYAVFGCGDHNWAS   | 668 |
| EJR22930.1             | LP-KEGAVLIVTSSYNGKPPSNAGQFVQWLEELK-----PDELKGVQYAVFGCGDHNWAS   | 590 |
| EJP91231.1             | LP-KEGAVLIVTSSYNGKPPSNAGQFVQWLEELK-----PDELKGVQYAVFGCGDHNWAS   | 590 |
| EJR37623.1             | LP-KEGAVLIVTSSYNGKPPSNAGQFVQWLEELK-----PDELKGVQYAVFGCGDHNWAS   | 590 |
| EJR50635.1             | LP-KEGAVLIVTSSYNGKPPSNAGQFVQWLEELK-----PDELKGVQYAVFGCGDHNWAS   | 590 |
| EJR64551.1             | LP-KEGAVLIVTSSYNGKPPSNAGQFVQWLEELK-----PDELKGIQYAVFGCGDHNWAS   | 590 |
| EJR75620.1             | LP-KEGAVLIVTSSYNGKPPSNAGQFVQWLEELK-----PDELKGVQYAVFGCGDHNWAS   | 590 |
| EJR82049.1             | LP-KEGAVLIVTSSYNGKPPSNAGQFVQWLEELK-----PDELKGVQYAVFGCGDHNWAS   | 590 |
| EJR83659.1             | LP-KEGAVLIVTSSYNGKPPSNAGQFVQWLEELK-----PDELKGVQYAVFGCGDHNWAS   | 590 |
| EJR91135.1             | LPQKEGAVLIITSSYNGKPPQNAKRFVHWLEHAE-----TGELKGVHFSVLGCGDRNWNT   | 587 |
| EJR97241.1             | LP-KEGAVLIVTSSYNGKPPSNAGQFVQWLEELK-----PDELKGVQYAVFGCGDHNWAS   | 590 |
| EJS05852.1             | LP-KEGAVLIVTSSYNGKPPSNAGQFVQWLEELK-----SDELKGVQYAVFGCGDHNWAS   | 590 |
| EDX58768.1             | LP-KEGAVLIVTSSYNGKPPSNAGQFVQWLEELK-----GDELKGVQYAVFGCGDHNWAS   | 590 |
| AAU24352.1             | IP-AEGAVIIVTASYNGNPPDCAKEFVNWLEHDQ-----TDDLKGVKYAVFGCGNRSWAS   | 584 |
| ABY44122.1             | LP-KEGAVLIVTSSYNGKPPSNAGQFVQWLEELK-----SDELKGVQYAVFGCGDHNWAS   | 590 |
| EDW23201.1             | LP-DKGAVFIVTASYNGHPPDHAKKFDWVDTQEK-----EQDLTNVTFVAVFGCGDRNWAS  | 578 |
| ABV62358.1             | LP-DKGAVLIVTASYNGHPPDHAKTFVDWVDTQDK-----EKDLTNVTFVAVFGCGDRNWAS | 578 |
| EIF12263.1             | LP-KEGALLIITSSYNGKPPSNAAQFVQWLEEVK-----PGELEGVRYAVFGCGDHNWAA   | 586 |
| EIF14027.1             | LP-VKGAVVIVTASYNGAPPDAAAGFVKWMETLE-----DQELKGVSYAVFGCGDRNWAA   | 580 |
| EHL75405.1             | LP-KEGAVLIVTSSYNGKPPSNAGQFVQWLEELK-----PDELKGVQYAVFGCGDHNWAS   | 590 |
| EJD67577.1             | LP-KEGALLIITSSYNGKPPSNAGQFVQWLEEVK-----PGELEGVRYAVFGCGDHNWAA   | 586 |
| EJD68347.1             | LP-VKGAVVIVTASYNGAPPDAAAGFVKWMETLE-----DQELKGVSYAVFGCGDRNWAA   | 580 |
| EFV73436.1             | IP-AEGAVIIVTASYNGNPPDCAKEFVNWLEHDQ-----TDDLKGVKYAVFGCGNRSWAS   | 598 |
| CBY93692.1             | LP-KEGAVLIVTSSYNGKPPSNAGQFVQWLEELK-----PDELKGVQYAVFGCGDHNWAS   | 590 |
| AFI27355.1             | LP-KEGAVVIVTSSYNGKPPSNARQFVQWLQEIK-----PGELEGVHYAVFGCGDHNWAS   | 587 |
| AFI29229.1             | LP-EEGAVVIVTASYNGAPPDAAAGFVEWLKELE-----EGRLKGVSYAVFGCGNRSWAS   | 580 |
| EIL85422.1             | LP-ESGVVLIVTASYNGHPPDHAKQFVDWVDTQDE-----EQDLSNVTFVAVFGCGDRNWAS | 578 |
| ADV93500.1             | LP-EEGAVVIVTASYNGSPPDAAAGFVEWLKELE-----EGQLKGVSYAVFGCGNRSWAS   | 580 |
| ADV95715.1             | LP-KEGAVVIVTSSYNGKPPSNAGQFVQWLQEIK-----PGELEGVHYAVFGCGDHNWAS   | 587 |
| BAI84248.1             | LP-KEGAVVIVTSSYNGKPPSNAGQFVQWLQEIK-----PGELEGVHYAVFGCGDHNWAS   | 587 |
| EFG90288.1             | LL-EQGAVVIVTASYNGAPPDAAAGFVEWLEGLE-----EGRLNGVSYAVFGCGNRSWAS   | 580 |
| EFG91781.1             | LP-KEGAVVIVTASYNGKPPSNAGQFVQWLQEIK-----PGELEGVHYAVFGCGDHNWAS   | 587 |
| AEP85668.1             | LP-KEGAVVIVTSSYNGKPPSNAGQFVQWLQEIK-----PGELEGVHYAVFGCGDHNWAS   | 587 |
| AEP87558.1             | LP-EQGAVVIVTASYNGAPPDAAAGFVEWLEGLE-----EGQLKGVSYAVFGCGNRSWAS   | 580 |
| sp O08336.1 CYPB_BACSU | LP-EEGAVVIVTASYNGAPPDAAAGFVEWLKELE-----EGQLKGVSYAVFGCGNRSWAS   | 580 |
| sp O08394.1 CYPD_BACSU | LP-KEGAVVIVTSSYNGKPPSNAGQFVQWLQEIK-----PGELEGVHYAVFGCGDHNWAS   | 587 |
| AEP89812.1             | LP-KEGAVVIVTSSYNGKPPSNAGQFVQWLQEIK-----LGELEGVHYAVFGCGDHNWAS   | 587 |

|            |                                                               |     |
|------------|---------------------------------------------------------------|-----|
| AEP91702.1 | LP-EEGAVVIVTASYNGAPPDNAAGFVEWLKELE-----EGQLKGVSYAVFGCGNRSWAS  | 580 |
| EHA31094.1 | LP-EEGAVVIVTASYNGSPDNAAGFVEWLKELE-----EGQLKGVSYAVFGCGNRSWAS   | 582 |
| ADH07708.1 | LP-KEGAVLIVTSSYNGKPPSNAGQFVQWLEELK-----PDELKGVQYAVFGCGDHNWAS  | 590 |
| EEM28177.1 | LP-KEGAVLIVTSSYNGKPPSNAGQFVQWLEELK-----PDELKGVQYAVFGCGDHNWAS  | 590 |
| AFQ14162.1 | LP-KEGAVLIVTSSYNGKPPSNAGQFVQWLEELK-----PDELKGVQYAVFGCGDHNWAS  | 590 |
| EEM95517.1 | LP-KEGAVLIVTSSYNGKPPSNAGQFVQWLEELK-----PEELKGVQYAVFGCGDHNWAS  | 590 |
| EEN02344.1 | LP-KEGAVLIVTSSYNGKPPSNAGQFVQWLEELK-----PDELKGVQYAVFGCGDHNWAS  | 590 |
| AFU13781.1 | LP-KEGAVLIVTSSYNGKPPSNAGQFVQWLEELK-----SDELKGVQYAVFGCGDHNWAS  | 598 |
| EEM70897.1 | LP-KEGAVLIVTSSYNGKPPSNAGQFVQWLEELK-----PDELKGVQYAVFGCGDHNWAS  | 598 |
| ADY22413.1 | LP-KEGAVLIVTSSYNGKPPSNAGQFVQWLEELK-----PDELKGVQYAVFGCGDHNWAS  | 590 |
| EEM82895.1 | LP-KEGAVLIVTSSYNGKPPSNAGQFVQWLEELK-----PDELKGVQYAVFGCGDHNWAS  | 590 |
| EEM52818.1 | LP-KEGAVLIVTSSYNGKPPSNAGQFVQWLEELK-----TDELKGVQYAVFGCGDHNWAS  | 590 |
| EEM59126.1 | LP-KEGAVLIVTSSYNGKPPSNAGQFVQWLEELK-----GDELKGVQYAVFGCGDHNWAS  | 598 |
| EEM47193.1 | LP-KEGAVLIVTSSYNGKPPSNAGQFVQWLEELK-----PDELKGVQYAVFGCGDHNWAS  | 531 |
| EEM76899.1 | LP-KEGAVLIVTSSYNGKPPSNAGQFVQWLEELK-----PDELKGVQYAVFGCGDHNWAS  | 598 |
| EEM88909.1 | LP-KEGAVLIVTSSYNGKPPSNAGQFVQWLEELK-----PDELKGVQYAVFGCGDHNWAS  | 598 |
| EEM38196.1 | LP-KEGAVLIVTSSYNGKPPSNAGQFVQWLEELK-----PDELKGVQYAVFGCGDHNWAS  | 590 |
| EEM21858.1 | LP-KEGAVLIVTSSYNGKPPSNAGQFVQWLEELK-----PDELKGVQYAVFGCGDHNWAS  | 593 |
| ABK86139.1 | LP-KEGAVLIVTSSYNGKPPSNAGQFVQWLEELK-----PDELKGVQYAVFGCGDHNWAS  | 598 |
| EJQ37805.1 | LP-KEGAVLIVTSSYNGKPPSNAGQFVQWLEELK-----PDELKGVQYAVFGCGDHNWAS  | 590 |
| CCF04242.1 | LP-KEGALLIITSSYNGKPPSNAGQFVQWLEEVK-----PGELEGVRYAVFGCGDHNWAA  | 586 |
| CCF05972.1 | LP-VKGAVVIVTASYNGAPPDNAAGFVKWMETLE-----DQELKGVSYAVFGCGDRNWAA  | 580 |
| ABS73124.1 | LP-KEGALLIITSSYNGKPPSNAGQFVQWLEEVK-----PGELEGVRYAVFGCGDHNWAA  | 586 |
| ABS74786.1 | LP-VKGAVVIVTASYNGAPPDNAAGFVKWMETLE-----DQELKGVSYAVFGCGDRNWAA  | 580 |
| EKE46398.1 | LP-KEGALLIITSSYNGKPPSNAGQFVQWLEEVK-----PGELEGVRYAVFGCGDHNWAA  | 586 |
| EKE48022.1 | LP-VKGAVVIVTASYNGAPPDNAAGFVKWTETLE-----DQELKGVSYAVFGCGDRNWAA  | 580 |
| CCG48683.1 | LP-KEGALLIITSSYNGKPPSNAGQFVQWLEEVK-----PGELEGVRYAVFGCGDHNWAA  | 586 |
| AFJ60789.1 | LP-KEGALLIITSSYNGKPPSNAGQFVQWLEEVK-----PGELEGVRYAVFGCGDHNWAA  | 593 |
| AFJ62808.1 | LP-VKGAVVIVTASYNGAPPDNAAGFVKWMETLE-----DQELKGVSYAVFGCGDRNWAA  | 580 |
| EEK66903.1 | LP-KEGAVLIVTSSYNGKPPSNAGQFVQWLEELK-----PDELKGVQYAVFGCGDHNWAS  | 604 |
| EJQ52935.1 | LP-KEGAVLIVTSSYNGKPPSNAGQFVQWLEELK-----PDELKGVQYAVFGCGDHNWAS  | 590 |
| EJS69574.1 | LP-KEGAVLIVTSSYNGKPPSNAGQFVQWLEELK-----PDELKGVQYAVFGCGDHNWAS  | 590 |
| EJV63294.1 | LP-KEGAVLIVTSSYNGKPPSNAGQFVQWLEELK-----PDELKGVQYAVFGCGDHNWAS  | 590 |
| EKF35778.1 | LP-ESGAVLIVTASYNGHPPDDAKQFVDWVTQDE-----EQDLSNVTFAVFGCGDRNWAS  | 578 |
| EGP08506.1 | LP-DKGGVLIIFCASYNGAAPDNATQFVKWLSGDL----AKDALSGVRYAVFGCGNSDWAA | 593 |
| BAL78328.1 | LP-QEGGVLIICASYNGAPPDNATQFVKWLGDDL----PKDAFANVRYAVFGCGNSDWAA  | 593 |
| BAC48147.1 | LP-QEGGVLIICASYNGAPPDNATQFVKWLGSDL----PKDAFANVRYAVFGCGNSDWAA  | 594 |
| BAL12135.1 | LP-HEGGVLIICASYNGAPPDNATQFVKWLGDDL----PEDAFANVRYAVFGCGNSDWAA  | 594 |

|            |                                          |                         |     |
|------------|------------------------------------------|-------------------------|-----|
| CCE00185.1 | LP-KDGGVLIIFCASYNGAPPDNAGKFVSWLHGEL----  | APDAFKGLRYAVFGCGNRDWAA  | 597 |
| EIG57609.1 | LP-REGGVLIICASYNGAPPDNATQFVKWLGDEL----   | PKDAFANVRYAVFGCGNSDWAA  | 593 |
| EHR02046.1 | LP-QEGGVLIICASYNGAPPDNAIQFVKWLGDEL----   | PKDAFANVRYAVFGCGNSDWAA  | 593 |
| EJN11211.1 | LP-QEGGVLIICASYNGAPPDNASQFVKWLGDDL----   | PKDAFANVRYAVFGCGNSDWAA  | 594 |
| CCF15606.1 | LP-KEGAVFIITSSYNGKPPSNAKDFVQWLKEAE-----  | PGEFTGVNYTVFGCGDHNWAS   | 525 |
| CCF12687.1 | LP-KEGVLLIVTASYNGKPPNARKFVQWLGGVE-----   | ADALQGVTYAVFGCGDRNWAN   | 589 |
| ABB05850.1 | LG-GYPAIVIVTASYEGQPPDNAKSFPYVEALD-----   | EGALDGVHFSVLGCGNKQWAR   | 591 |
| EHP43606.1 | LP-TDGLAVIVAATYNGRAPDSARRFEAMLD SGDA---  | GGYRAANLRFALLGCGNSQWA-  | 611 |
| ABF10339.1 | LP-TSGLVVVVAATYNGRAPDSARKFEAMLDADDA---   | SGYRANGMRLALLGCGNSQWA-  | 586 |
| CAJ95800.1 | LP-TTGLAVIIAATYNGRAPDSARRLEALLDSGAA---   | SGYRAEALSVAVLGCGNSQWP-  | 613 |
| AEI79937.1 | LP-TTGLAVIIAATYNGRAPDSARRLEALLDSGAA---   | SGYRAEGLSVAVLGCGNSQWP-  | 613 |
| AFD27790.1 | LP-TQGAVVIVTSSYSQPPANARRFMAWAQLD-----    | AGALAGVQYAVFGCGNRDWAA   | 588 |
| ABC62112.1 | LP-TDGAVAIACASYNGMPPDNAAKFVDWLEQADA---   | ADAPLSNVSYLVLGCGNSDWAA  | 588 |
| EAQ27850.1 | LP-EDGAVAIACASYNGMPPDNAAKFIDWIEGKDG---   | AAPDLSGVSYMMMLGCGNSDWAA | 589 |
| EIT84377.1 | LP-TDGAVLIVTSSYNGKPPKNAERFLNWLSTLD-----  | ETALRGVSFSVFGCGDHNWAA   | 576 |
| CCG43686.1 | LP-AEGAVLIVSASYNGNPPDNADAFVRWLKEAD-----  | GEEAKGVSYAVFGCGDRNWAS   | 582 |
| ABX05160.1 | LP-TTGAVSIVAASYNGQPADNAQAFQCQWLAGVE----- | PNSLKGVRYSVFGCGNRDWQS   | 581 |
| BAJ96920.1 | LP-TSGGVVIVTSSYEGHPTDNAKQFVSWLDTLQ-----  | PDSLKGVKYTVFGCGDRDWLR   | 584 |
| GAB96874.1 | LP-TDGALVVVSASYEGQPPDNAKAFVRWLDEQP-----  | DGALDGVRFVAVFGCGNTDWAR  | 639 |
| EFH80345.1 | LP-TEGVVVVVTSSYNGTTPDNAA AFCAWLQEDM---   | AANSLKGVKYTVFGSGNHDWFA  | 595 |
| EFH88481.1 | LP-KEGLVVLVTSSYNGMPPDNASAFQCWLQSDL---    | APDALKGVNYTIFGCGNHEWAG  | 596 |
| EAW32450.1 | LP-SDGAVLLITGSYNGTPTDDAKTFMAWLEST-----   | EQSLGHVRYGVFGVGNRDWAT   | 586 |
| EIZ82104.1 | LP-KECAVIVVTASYEGHPPDNARRFLAWVEGLG-----  | PEALAGVRFTVFGCGNRQWAR   | 584 |
| AEV70722.1 | LP-DADAILIITSSYNGOPTDDARAFLTWLTGDG-----  | AALRGPNVAVLGVGDRNWAD    | 579 |
| EFC41452.1 | IP-LDTPILIVTASYEGOPTEDAKQFVGWLEHVP-----  | ENTLKGLKYAVFGCGHSDWVD   | 616 |
| ACV78954.1 | LP-VDRPLVVITASYNGQPAAGARDFVSWLSAAP-----  | DGAAHGVRFAVFGCGDHNWPT   | 605 |
| ACV78964.1 | VP-ANGALIVVSASYNGMPPENAEDFVAVMRDPSL---   | PSDAFAGLSFTVFGCGD TDWAS | 591 |
| ACV81379.1 | LP-AEGAVLVVSASYNGEAPENAAAFVDKLRRAV---    | PDGAYAGVRFTVFGCGD TDWAA | 594 |
| EIZ78677.1 | LP-RDGAVIIVTASYEGQPPDNARRFVTWIEGLG-----  | AETLKGVRFAIFGCGNRQWAR   | 585 |
| EJW15291.1 | LP-KEGITFIVTASYNGQPPSNARRFVKWLKEVE-----  | PESLKGVS YCVFGCGDHNWPS  | 584 |
| EJW16173.1 | LP-RTGAVLIVTSSYNGKPPSNAQT FVEWLERLD----- | DGELEGVRYSVFGCGDRNWAS   | 587 |
| EHQ58913.1 | LP-AEGVIYIVTSSYNGMPPNARGFVQWLREAA-----   | PGELEGIRYCVFGCGDRNWAS   | 585 |
| EHQ59900.1 | LP-KEGVV FIVSASYNGKPPSNAREFVQWLEGAE----- | PGAFEGVRYAVFGCGDHNWAG   | 584 |
| EHB66924.1 | LP-KEGAVVIVSASYNGQPPSNAKS FVEWLENAD----- | ESELQGVRYAVFGCGDHNWAS   | 585 |
| AFH60445.1 | LP-KEGAVFIVTASYNGSPPDNARAFVQWLEQAE-----  | PGSLDGVRYAVFGCGDHNWAS   | 584 |
| AEI42011.1 | LP-KEGAVFIVTASYNGSPPDNARAFVQWLEQAE-----  | PGSLDGVRYAVFGCGDHNWAS   | 584 |
| ADO57681.1 | LP-KEGVLLITTATYNGHPPDNADAFVEWLKEVD-----  | EGQLAGIRYAVFGCGDRNWAS   | 583 |
| EGG32133.1 | LP-KEGVVIVTASYNGQPPSNAKTFMEWLENAN-----   | ESEIEGVRYAVFGCGDHNWAS   | 587 |

|            |                                                               |     |
|------------|---------------------------------------------------------------|-----|
| EGL17662.1 | LP-KEGAVFLVTASYNGKPPSNAKDFMDWLESAE-----PSEIAGVRFVAVFGCGDHNWAS | 586 |
| ACX65034.1 | LP-KEGVVVIVTASYNGQPPSNAKAFMEWLENAN-----ESEIEGVRYAVFGCGDHNWAS  | 587 |
| ACT11327.1 | LP-QTGALIVITASYEGMPPNARHFVPWVEGLA-----DDALSGLKFSVFGCGNLQWVR   | 588 |
| AEA28016.1 | LP-KEGGLVVVCASYNGMPPDNAERFCAWIRDAAT---PADTAAGAAYAVFGCGNMDWAS  | 598 |
| EFP68091.1 | LP-QQGVLIIVVAATYNGRAPDSARTLEARLDAAAA---LTRQATGLRYAVLGCNSQWP-  | 599 |
| EGY61507.1 | LP-QQGVLIIVVAATYNGRAPDSARTLEARLDAAAA---LTRQATGLRYAVLGCNSQWP-  | 599 |
| EIE85788.1 | KL-DKQLVVICTATYNGQPPDNAENFDKFLDKKMRDHDHENIFTGLSYAVFGLGKNKNR-  | 698 |
| EIE92534.1 | KL-DKELVVICTATYNGQPPDSAEKFDSFLDNKMREDDHENILTGLSYAVFGLGKNKNR-  | 701 |
| BAE46296.1 | -----                                                         | 510 |
| BAH31604.1 | -----                                                         | 466 |
| EEN84644.1 | -----                                                         | 466 |
| EEN88978.1 | -----                                                         | 550 |
| ABG96413.1 | -----                                                         | 498 |
| BAH52971.1 | -----                                                         | 465 |
| EHI44575.1 | -----                                                         | 500 |
| EID73168.1 | -----                                                         | 465 |
| EHK83749.1 | -----                                                         | 441 |
| EJI96173.1 | -----                                                         | 465 |
| ABI79384.1 | -----                                                         | 497 |
| CAR47816.1 | -----                                                         | 498 |
| AEK26937.1 | -----                                                         | 473 |
| ABE39056.1 | LP-EEGGVLIFTASYNGAPPDNATQFVQWLSGDL---PKDAFAKLRYAVFGCGNRDWT    | 594 |
| ABD08340.1 | LP-EEGGVLIFAASYNGAPPDNATQFVRWLSGDL---PPDAFAKLRYAVFGCGNRDWT    | 591 |
| CAM03474.1 | LP-SDRPVIVVAASYNGRPTDDAVSFSRWLDEAE-----PGAADGVDFAVLGVGDRNWAA  | 589 |
| EJF54063.1 | AQ-NKGHYVIITASYEGQPTHDAEEFVDWIVAQP-----EGSLNQVQYSLFGCGNSDWHI  | 599 |
| AFC23737.1 | AQ-NKGHYVIITASYEGQPTHDAEEFVDWIVEQP-----EGSLDQVQYSLFGCGNSDWHI  | 587 |
| ADG98903.1 | -----                                                         | 471 |
| EGI54680.1 | LP-DGVPLIIATASYEGRPPDNAARFVPWLECLP-----EQALAGRRTVFGCGNRQWAR   | 581 |
| AEW97204.1 | LP-RTSPVVVVAASYNGRPTDDAAGFVSWLEQAG-----PGAADGVRYAVLGVGDRNWAA  | 603 |
| CAJ88567.1 | -----DAASAPRCVPVPRADD-----                                    | 516 |
| BAC68285.1 | LP-TEGLLVVVASSYNGKAPDNAQRFDLLAAGLP---EGS-LSNVRFALLGAGNTQWVA   | 588 |
| BAC75137.1 | -----PEVSS-GPRCPVTGAGE-----                                   | 504 |
| EDY51256.1 | AP-G-QPVLIVASSYNGRPTDDACRFVEWLESGA-----APADVPIYAVLIGIGDRNWAA  | 588 |
| EFG07822.1 | AP-G-QPVLIVASSYNGRPTDDACRFVEWLESGA-----APADVPIYAVLIGIGDRNWAA  | 620 |
| EHN78335.1 | -----NAGSASRCPVHRAGD-----                                     | 525 |
| CAB66201.1 | -----DTVSAPGCPVHRAGD-----                                     | 527 |
| EGG48117.1 | -----EDSSAPGRPVRGAGE-----                                     | 517 |
| EFL20831.1 | TP-GAGPVVIVAASYNGRPTDDATEFVAVLEGLE-----PGSLDGVQYAVLGVGDRNWAA  | 595 |

|            |                                                              |     |
|------------|--------------------------------------------------------------|-----|
| EFL28515.1 | LP-TDRPVVITAASYNGQPTDDAAAFLOWLETAE-----PGAADGVEYAVLGVGDRNWAA | 590 |
| AEY93311.1 | -----GPAQPPSASRCPVHGAAD-----                                 | 542 |
| AEY93321.1 | LP-TDRPVVIAAASYNGRPTDDAVAFWLDGTP-----DLTGVTYAVLGVGDRNWAA     | 590 |
| EFD71156.1 | -----DTVSAPGCPVHRAGD-----                                    | 529 |
| CBG67789.1 | SA-VDGPVVIVAASYNGRPTDDATRMEWLDDLA-----PGSLDGLRYAVLGVGDRNWAA  | 591 |
| CBG68112.1 | -----PPTPSSAPSGRPVTGAGE-----                                 | 513 |
| EFL10082.1 | -----                                                        | 501 |
| EFF88741.1 | SG-AKGPVVIVAASYNGKPTDDAAQFMKYLEGLE-----PGSLDGLTYAVLGVGDRNWAA | 592 |
| EDY58112.1 | -----EAPVPASESGCPVHRAGD-----                                 | 506 |
| EFL36674.1 | -----EPASELRCPVPGAGD-----                                    | 510 |
| EFL36680.1 | LP-TDRPVVITAASYNGRPTDDATAFAARLEETH-----DLSGVTYAVLGVGDRNWAA   | 640 |
| EFE65335.1 | -----RVNPAASYRRSPGPRRAGAG-----                               | 526 |
| EGX54696.1 | -----                                                        | 491 |
| ACZ89135.1 | LP-AEGAVVVVTASYNGQPPDNARDFVTWLSVDP-----RGALEGVRYAVFGCGSRDWLS | 581 |
| ABD83817.1 | LP-DSGGVLIFCASYNGAPPDNATKFGWLRGEL----PNDFAKLRYAVFGCGNRDWAA   | 594 |
| ADU39615.1 | LP-ANGAVAIVCASYNGVAPDNAAEFHRWLD--K---ADDALNGVRFVSVFGCGNTDWAA | 591 |
| EJL72014.1 | LP-ANGAVAIVCASYNGVAPDNAAEFHRWLD--K---ADDSLNGVRFVSVFGCGNTDWAA | 592 |

```

sp|P14779.2|CPXB_PRIM2      TYQKVPAFIDETLAAKGAENIADRGEADASDDFEGTYEEWREHMWSDVAAYFNLDIENS- 636
ADF40088.1                  TYQKVPAFIDETLAAKGAENIADRGEADASDDFEGTYEEWREHMWSDVAAYFNLDIENS- 636
ADE70259.1                  TYQKVPAFIDETLAAKGAENIAERGEADASDDFEGTYEEWREHMWSDLAAYFNLDIENS- 636
AEN88827.1                  TYQKVPAFIDETLAAKGAENIAERGEADASDDFEGTYEEWREHMWSDVAAYFNLDIENS- 636
KFN05180.1                  TYQKVPAFIDETLAAKGAENIADRGEADASDDFEGTYEEWREHMWSDVAAYFNLDIENS- 636
ACZ37122.1                  TYQKVPAFIDETLAAKGAENIAERGEADASDDFEGTYEEWREHMWSDLAAYFNLDIENS- 636
ADA57055.1                  TYQKVPAFIDETLAAKGAENIADRGEADASDDFEGTYEEWREHMWSDVAAYFNLDIENS- 636
ADA57058.1                  TYQKVPAFIDETLAAKGAENIAERGEADASDDFEGTYEEWREHMWSDLAAYFNLDIENS- 636
ADA57059.1                  TYQKVPAFIDETLAAKGAENIADRGEADASDDFEGTYEEWREHMWSDVAAYFNLDIENS- 636
ADA57061.1                  TYQKVPAFIDETLAAKGAENIAERGEADASDDFEGTYEEWREHMWSDLAAYFNLDIENS- 636
ADA57062.1                  TYQKVPAFIDETLAAKGAENIADRGEADASDDFEGTYEEWREHMWSDVAAYFNLDIENS- 636
ADA57068.1                  TYQKVPAFIDETFAAKGAENIAERGEADASDDFEGTYEEWREHMWSDLAAYFNLDIENS- 636
AAT62301.1                  TYQRI PRYIDEQMAQKGATRFSTRGEADASGDFEEQLEQWKQSMWSDAMKAFGLELKNM 650
AAM54108.1                  TYQRVPTLIDEAMAAAGARRLRERGATDARADFFGDWERWYEPWPLLSAECGVEVGEI- 640
EFQ83738.1                  ----- 505
EFL88452.1                  TFQATPRIIDEHMKRAGATAYVETGEGDAKEDLDAEFDTWFGPWWQHTGKALGLDV---- 644
BAF89518.1                  TFQKFPKTIASGLAALGGTALLDEGTADAAGDYEAAVEGWTAAALWPALEAAFGGGAAGAAV 740
CBI43648.1                  TYQRI PRLIDKVL EEKGAKRLT SIGEGDNADDFEYSQEAWEDSFWKDIMKAFHIEAA--- 637
AEB22839.1                  TYQAVPRLIDEKLAEKGAERFSSRGEADVSGDFEGKLDWKSMWKDAMKAFGLKLNENA 647
EDT22025.1                  TYQRI PRYIDEQMAQKGATRFSTRGEADASGDFEEQLEQWKQRMWSDAMKVFGLKLNKNM 650
AFH84458.1                  TYQRI PRYIDEQMAQKGATRFSTRGEADASGDFEEQLEQWKQRMWSDAMKVFGLKLNKNM 658
ADP31197.1                  TYQDVPRYIDEQLAQKGAARFSARGEADVSGDFEGQLDQWKQTMWSDAMNAFGLKLNENA 647
ACP19384.1                  TYQRI PRYIDEQMAQKGATRFSTRGEADASGDFEEQLEQWKQSMWSDAMKAFGLELKNM 650
ADL27534.1                  TYQRI PRYIDEQMAQKGATRFSTRGEADASGDFEEQLEQWKQSMWSDAMKAFGLELKNM 650
ACO29732.1                  TYQRI PRYIDEQMAQKGATRFSTRGEADASGDFEEQLEQWKQRMWSDAMKAFGLELKNM 650
EDX65100.1                  TYQRI PRYIDEQMAQKGATRFSTRGEADASGDFEEQLEQWKQRMWSDAMKAFGLELKNM 650
EEK61456.1                  TYQRI PRYIDEQMAQKGATRFSTRGEADASGDFEEQLEQWKQSMWSDAMKAFGLELKNM 650
EEL16232.1                  TYQRI PRYIDEQMAQKGATRFSTRGEADASGDFEEQLEQWKQRMWSDAMKAFGLELKNM 658
EDZ53094.1                  TYQRI PRYIDEQMAQKGATRFSTRGEADASGDFEEQLEQWKQSMWSDAMKAFGLELKNM 650
EEL81346.1                  TYQRI PRYIDEQMAQKGATRFSTRGEADASGDFEEQLEQWKQSMWSDAMKAFGLELTKT- 663
EEL87105.1                  TYQRI PRYIDEQMAQKGATRFSTRGEADASGDFEEQLEQWKQSMWSDAMKAFGLELKNNI 664
EEL75761.1                  TYQRI PRYIDEQMAQKGATRFSTRGEADASGDFEEQLEQWKQNMWSDAMKAFGLELKNM 591
ACK88541.1                  TYQRI PRYIDEQMAQKGATRFSTRGEADASGDFEEQLEQWKQRMWSDAMKAFGLELKNM 650
EJQ05303.1                  TYQRI PRYIDEQMAQKGATRFSTRGEADASGDFEEQLEQWKQSMWSDAMKSFGLELKNM 650
EEK50040.1                  TYQRI PRYIDEQMAQKGATRFSTRGEADASGDFEEQLEQWKQSMWSDAMKAFGLELKNM 650
AAS42149.1                  TYQRI PRYIDEQMAQKGATRFSTRGEADASGDFEEQLEQWKESMWSAMKAFGLELKNM 650
AAP10153.1                  TYQRI PRYIDEQMAQKGATRFSTRGEADASGDFEEQLEQWKQNMWSDAMKAFGLELKNM 650
EEK83466.1                  TYQRI PRYIDEQMAQKGATRFSTRGEADASGDFEEQLEQWKQSMWSDAMKAFGLELKNM 658

```

|            |                                                                |     |
|------------|----------------------------------------------------------------|-----|
| ACK63698.1 | TYQRI PRYIDEQMAQKGATRF SKRGEADASGDFEEQLEQWKQSMWSDAMKAFGLELKNM  | 591 |
| EJS57156.1 | TYQRI PRYIDEQMAQKGATRF SKRGEADASGDFEEQLEQWKQNMWSDAMKAFGLELKNM  | 650 |
| EJS56605.1 | TYQRI PRYIDEQMAQKGATRF STRGEADASGDFEEQLEQWKQSMWSDAMKAFGLELKNM  | 650 |
| EJS68951.1 | TYQNV PRYIDEQMAQQGATRF STRGEGDASGDFEEQLNQWKQSMWSDAMKAFGLEFNENV | 649 |
| EJQ10567.1 | TYQRI PRYIDEQMAQKGATRF SKRGEADASGDFEEQLEQWKQSMWSDAMKAFGLELKNM  | 650 |
| EJQ13433.1 | TYQRI PRYIDEQMAQKGATRF STRGEADASGDFEEQLEQWKQSMWSDAMKAFGLELKNM  | 650 |
| EJQ20399.1 | TYQRI PRYIDEQMAQKGATRF SKRGEADASGDFEEQLEQWKQSMWSDAMKAFGLELKNM  | 650 |
| EJQ30236.1 | TYQRI PRYIDEQMAQKGATRF SKRGEADASGDFEEQLEQWKQSMWSDAMKAFGLELKNM  | 650 |
| EJQ51278.1 | TYQNV PRYIDEQMAQQGATRF STRGEGDASGDFEEQLNQWKQSMWSDAMKAFGLEFNENV | 649 |
| EEL10858.1 | TYQRI PRYIDEQMAQKGATRF SKRGEADASGDFEEQLEQWKQNMWSDAMKAFGLELKNM  | 650 |
| EEL05393.1 | TYQRI PRYIDEQMAQKGATRF STRGEADASGDFEEQLEQWKQSMWSDAMKAFGLELKNM  | 664 |
| EEK94080.1 | TYQRI PRYIDEQMAQKGATRF SKRGEADASGDFEEQLEQWKQNMWSDAMKAFGLELKNM  | 653 |
| EEK99882.1 | TYQRI PRYIDEQMAQKGATRF SKRGEADASGDFEEQLEQWKQSMWSDAMKSFGLELKNM  | 653 |
| EEK55784.1 | TYQRI PRYIDEQMAQKGATRF SKRGEADASGDFEEQLEQWKQRMWSDAMKAFGLELKNM  | 658 |
| ADK05784.1 | TYQRI PRYIDEQMAQKGATRF SKRGEADASGDFEEQLEQWKQSMWSDAMKAFGLELKNM  | 650 |
| AAU17340.1 | TYQRI PRYIDEQMAQKGATRF STRGEADASGDFEEQLEQWKESMWS DAMKAFGLELKNM | 650 |
| EEL64394.1 | TYQRI PRYIDEQMAQKGATRF SKRGEADASGDFEEQLEQWKQSMWSDAMKAFGLELKNM  | 650 |
| AEW56259.1 | TYQRI PRYIDEQMAQKGATRF STRGEADASGDFEEQLEQWKQRMWSDAMKAFGLELKNM  | 650 |
| AFQ11690.1 | TYQRI PRYIDEQMAQKGATRF STRGEADASGDFEEQLEQWKESMWS DAMKAFGLELKNM | 650 |
| EAL16831.1 | TYQRI PRYIDEQMAQKGATRF SKRGEADASGDFEEQLEQWKQSMWSDAMKAFGLELKNM  | 650 |
| ACK94296.1 | TYQRI PRYIDEQMAQKGATRF SKRGEADASGDFEEQLEQWKQGMWSDAMKAFGLEFNKNM | 650 |
| EDZ58760.1 | TYQRI PRYIDEQMAQKGATRF SKRGEADASGDFEEQLEQWKQSMWSDAMKSFGLELKNM  | 650 |
| EJV84218.1 | TYQRI PRYIDEQMAQKGATRF STRGEADASGDFEEQLEQWKQRMWSDAMRAFGLELKNM  | 650 |
| EJQ69212.1 | TYQRI PRYIDEQMAQKGATRF STRGEADASGDFEEQLEQWKQSMWSDAMKAFGLELKNM  | 650 |
| EJQ80339.1 | TYQRI PRYIDEQMAQKGATRF STRGEADASGDFEEQLEQWKQSMWSDAMKAFGLELKNM  | 650 |
| EJV81602.1 | TYQRI PRYIDEQMAQKGATRF SKRGEADASGDFEEQLEQWKQNMWSDAMKAFGLELKNM  | 650 |
| EJQ95474.1 | TYQRI PRYIDEQMAQKGATRF SKRGEADASGDFEEQLEQWKQSMWSDAMKAFGLELKNM  | 650 |
| EEK44229.1 | TYQRI PRYIDEQMAQKGATRF SKRGEADASGDFEEQLEQWKQSMWSDAMKAFGLELKNM  | 658 |
| EEK88560.1 | TYQRI PRYIDEQMAQKGATRF SKRGEADASGDFEEQLEQWKQNMWSDAMKAFGLELKNM  | 650 |
| EJR07451.1 | TYQRI PRYIDEQMAQKGATRF SKRGEADASGDFEEQLEQWKQGMWSDAMKAFGLEFNKNM | 647 |
| EJR16542.1 | TYQRI PRYIDEQMAQKGATRF SKRGEADASGDFEEQLEQWKQSMWSDAMKAFGLELKNM  | 650 |
| BAL18840.1 | TYQRI PRYIDEQMAQKGATRF SKRGEADASGDFEEQLEQWKQSMWSDAMKSFGLELKNM  | 650 |
| EDX69960.1 | TYQRI PRYIDEQMAQKGATRF STRGEADASGDFEEQLEQWKQSMWSDAMKAFGLELKNM  | 650 |
| ACM13462.1 | TYQRI PRYIDEQMAQKGATRF SKRGEADASGDFEEQLEQWKQSMWSDAMKSFGLELKNM  | 650 |
| EEK75631.1 | TYQRI PRYIDEQMAQKGATRF SKRGEADASGDFEEQLEQWKQSMWSDAMKAFGLELKNM  | 650 |
| EEL25491.1 | TYQRI PRYIDEQMAQKGATRF SKRGEADASGDFEEQLEQWKQNMWSDAMKAFGLELKNM  | 591 |
| EEL21990.1 | TYQRI PRYIDEQMAQKGATRF STRGEADASGDFEEQLEQWKQSMWSDAMRAFGLELKNM  | 658 |
| EEL33825.1 | TYQRI PRYIDEQMAQKGATRF SKRGEADASGDFEEQLEQWKQSMWSDAMRAFGLELKNM  | 658 |

|                        |                                                               |     |
|------------------------|---------------------------------------------------------------|-----|
| EEL44933.1             | TYQRI PRYIDEQMAQKGATRFSTRGEADASGDFEEQLEQWKQRMWSDAMKAFGLELKNM  | 658 |
| EEL50167.1             | TYQNVPRYIDEQMAQQGATRFSTRGEGDASGDFEEQLNQWKQSMWSDAMKAFGLELKNENV | 728 |
| EJR22930.1             | TYQRI PRYIDEQMAQKGATRFSTRGEADASGDFEEQLEQWKQSMWSDAMKAFGLELKNM  | 650 |
| EJP91231.1             | TYQRI PRYIDEQMAQKGATRFSTRGEADASGDFEEQLEQWKQGMWSDAMKAFGLEFNKNM | 650 |
| EJR37623.1             | TYQRI PRYIDEQMAQKGATRFSTRGEADASGDFEEQLEQWKQNMWSDAMKAFGLELKNM  | 650 |
| EJR50635.1             | TYQRI PRYIDEQMAQKGATRFSTRGEADASGDFEEQLEQWKQSMWSDAMKAFGLELKNM  | 650 |
| EJR64551.1             | TYQRI PRYIDEQMAQKGATRFSTRGEADASGDFEEQLEQWKQSMWSDAMRAFGLELKNM  | 650 |
| EJR75620.1             | TYQRI PRYIDEQMAQKGATRFSTRGEADASGDFEEQLEQWKQNMWSDAMKAFGLELKNM  | 650 |
| EJR82049.1             | TYQRI PRYIDEQMAQKGATRFSTRGEADASGDFEEQLEQWKQSMWSDAMKAFGLELKNM  | 650 |
| EJR83659.1             | TYQRI PRYIDEQMAQKGATRFSTRGEADASGDFEEQLEQWKQNMWSDAMKAFGLELKNM  | 650 |
| EJR91135.1             | TYQEVPRFIDKLLVQKGATRFSTRGEADVSGDFDKQLEEWKFQMWKDARKIFDLRLNENN  | 647 |
| EJR97241.1             | TYQRI PRYIDEQMAQKGATRFSTRGEADASGDFEEQLEQWKQSMWSDAMKAFGLELKNM  | 650 |
| EJS05852.1             | TYQRI PRYIDEQMAQKGATRFSTRGEADASGDFEEQLEQWKQSMWSDAMKAFGLELKNM  | 650 |
| EDX58768.1             | TYQRI PRYIDEQMAQKGATRFSTRGEADASGDFEEQLEQWKQRMWSDAMKAFGLELKNM  | 650 |
| AAU24352.1             | TYQRI PRLIDSVLEKKGAQRLHKLGEADAGDDFEGQFESWKYDLWPLLRTFSLAEPEPN  | 644 |
| ABY44122.1             | TYQRI PRYIDEQMAQKGATRFSTRGEADASGDFEEQLEQWKQSMWSDAMKAFGLELKNM  | 650 |
| EDW23201.1             | TYQRI PRLIDEALERKGAADLGEADAGDDMDEDKEAFQKTVFKQLAKEFQLTFQ---    | 635 |
| ABV62358.1             | TYQRI PRLIDEALESKGAKRVADLGEADAGDDMDEDKETFKIVFEQLAKEFQLTFQ---  | 635 |
| EIF12263.1             | TYQAVPRLIDEKLAEKGAERFSSRGEADVSGDFEGKLEWKKSMWTDAMKVFGLKLNENA   | 646 |
| EIF14027.1             | TYQRI PRLIDKVLEEKGAKRLTSIGEGDNADDFEYSQEAWEWSFWKDIMKAFHIEAA--- | 637 |
| EHL75405.1             | TYQRI PRYIDEQMAQKGATRFSTRGEADASGDFEEQLEQWKQSMWSDAMKAFGLELKNM  | 650 |
| EJD67577.1             | TYQAVPRLIDEKLAEKGAERFSSRGEADVSGDFEGKLEWKKSMWTDAMKAFGLKLNENA   | 646 |
| EJD68347.1             | TYQRI PRLIDKVLEEKGAKRLTSIGEGDNADDFEYSQEAWEWSFWKDIMKAFHIEAA--- | 637 |
| EFV73436.1             | TYQRI PRLIDSVLEKKGAQRLHKLGEADAGDDFEGQFESWKYDLWPLLRTFSLAEPEPN  | 658 |
| CBY93692.1             | TYQRI PRYIDEQMAQKGATRFSTRGEADASGDFEEQLEQWKQSMWSDAMKAFGLELKNM  | 650 |
| AFI27355.1             | TYQDVPRFIDEQLAEKGATRFSTRGEADVSGDFEGQLEWKKSMWADAIKAFGLELKNM    | 647 |
| AFI29229.1             | TYQRI PRLIDMMKAKGATRLTAIGEGDAADDFESHRESWENRFWKETLDAFDINEI---  | 637 |
| EIL85422.1             | TYQRI PRLIDEALERKGAKRVTDIGEGDAGDDMDEDKETFKTVFDELAKFNLTLO---   | 635 |
| ADV93500.1             | TYQRI PRLIDMMKAKGASRLTAIGEGDAADDFESHRESWENRFWKETMDAFDINEI---  | 637 |
| ADV95715.1             | TYQYVPRFIDEQLAEKGATRFSTRGEADVSGDFEGQLEWKKSMWADAIKAFGLELKNM    | 647 |
| BAI84248.1             | TYQYVPRFIDEQLAEKGATRFSTRGEADVSGDFEGQLEWKKSMWADAIKAFGLELKNM    | 647 |
| EFG90288.1             | TYQRI PRLIDMMKAKGASRLTAIGEGDAADDFESHRESWENRFWKETMEAFINEI---   | 637 |
| EFG91781.1             | TYQYVPRFIDEQLAEKGATRFSTRGEADVSGDFEGQLEWKKSMWTDAIKAFGLELKNM    | 647 |
| AEP85668.1             | TYQYVPRFIDEQLAEKGATRFSTRGEADVSGDFEGQLEWKKSMWTDAIKAFGLELKNM    | 647 |
| AEP87558.1             | TYQRI PRLIDMMKAKGASRLTAIGEGDAADDFESHRESWENRFWKETMEAFHINEI---  | 637 |
| sp 008336.1 CYPB_BACSU | TYQRI PRLIDMMKAKGASRLTAIGEGDAADDFESHRESWENRFWKETMDAFDINEI---  | 637 |
| sp 008394.1 CYPD_BACSU | TYQYVPRFIDEQLAEKGATRFSTRGEADVSGDFEGQLEWKKSMWADAIKAFGLELKNM    | 647 |
| AEP89812.1             | TYQDVPRFIDEQLAEKGATRFSTRGEADVSGDFEGQLEWKKSMWADAIKAFGLELKNM    | 647 |

|            |                                                                |     |
|------------|----------------------------------------------------------------|-----|
| AEP91702.1 | TYQRI PRLIDMMKAKGASRLTAIGEGDAADD FESHRESWENRFWKETMDAFDINEI---  | 637 |
| EHA31094.1 | TYQRI PRLIDMMKAKGASRLTEIGEGDAADD FESHRESWENRFWKETMDAFDINEI---  | 639 |
| ADH07708.1 | TYQRI PRYIDEQMAQKGATRF SKRGEADASGDFEEQLEQWKQNMWSDAMKAFGLELKNM  | 650 |
| EEM28177.1 | TYQRI PRYIDEQMAQKGATRF SKRGEADASGDFEEQLEQWKQNMWSDAMKAFGLELKNM  | 650 |
| AFQ14162.1 | TYQRI PRYIDEQMAQKGATRF SKRGEADAGGDFEEQLEQWKQGMWSDAMKAFGLEFNKNM | 650 |
| EEM95517.1 | TYQRI PRYIDEQMAQKGAKRF SKRGEADASGDFEEQLEQWKQSMWSDAMKTFGLELKNM  | 650 |
| EEN02344.1 | TYQRI PRYIDEQMAQKGATRF SKRGEADASGDFEEQLEQWKQGMWSDAMKAFGLEFNKNM | 650 |
| AFU13781.1 | TYQRI PRYIDEQMAQKGATRF SKRGEADASGDFEEQLEQWKQSMWSDAMRAFGLELKNM  | 658 |
| EEM70897.1 | TYQWI PRYIDEQMAQKGATRF STRGEADASGDFEEQLEQWKQRMWSDAMKAFGLELKNM  | 658 |
| ADY22413.1 | TYQRI PRYIDEQMAQKGATRF SKRGEADASGDFEEQLEQWKQSMWSDAMKAFGLELKNM  | 650 |
| EEM82895.1 | TYQRI PRYIDEQMAQKGATRF SKRGEADASGDFEEQLEQWKQSMWSDAMKAFGLELKNM  | 650 |
| EEM52818.1 | TYQRI PRYIDEQMAQKGATRF SKRGEADASGDFEEQLEQWKQSMWSDAMKAFGLELKNM  | 650 |
| EEM59126.1 | TYQRI PRYIDEQMAQKGATRF STRGEADASGDFEEQLEQWKQRMWSDAMKAFGLELKNM  | 658 |
| EEM47193.1 | TYQRI PRYIDEQMAQKGATRF SKRGEADASGDFEEQLEQWKQNMWSDAMKAFGLELKNM  | 591 |
| EEM76899.1 | TYQRI PRYIDEQMAQKGATRF STRGEADASGDFEEQLEQWKQRMWSDAMKAFGLELKNM  | 658 |
| EEM88909.1 | TYQRI PRYIDEQMAQKGATRF SKRGEADASGDFEEQLEQWKQSMWSDAMKAFGLELKNM  | 658 |
| EEM38196.1 | TYQRI PRYIDEQMAQKGATRF SKRGEADAGGDFEEQLEQWKQGMWSDAMKAFGLEFNKNM | 650 |
| EEM21858.1 | TYQRI PRYIDEQMAQKGATRF SERGEADASGDFEEQLEQWKQSMWSDAMKAFGLELKNM  | 653 |
| ABK86139.1 | TYQRI PRYIDEQMAQKGATRF STRGEADASGDFEEQLEQWKQRMWSDAMKAFGLELKNM  | 658 |
| EJQ37805.1 | TYQRI PRYIDEQMAQKGATRF STRGEADASGDFEEQLEQWKQSMWSDAMRAFGLELKNM  | 650 |
| CCF04242.1 | TYQAV PRLIDEKLAEKGAERFSARGE DVSGDFEGKLEWKKSMWTDAMKAFGLKLNENA   | 646 |
| CCF05972.1 | TYQRI PRLIDKVLEEKGAKRLTSIGEGDNADD FEYSQEAWEDSFWKDIMKAFHIEAA--- | 637 |
| ABS73124.1 | TYQAV PRLIDEKLAEKGAERFSSRGE DVSGDFEGKLEWKKSMWTDAMKAFGLKLNENA   | 646 |
| ABS74786.1 | TYQRI PRLIDKVLEEKGAKRLTSIGEGDNADD FEYSQEAWEDSFWKDIMKAFHIEAA--- | 637 |
| EKE46398.1 | TYQAV PRLIDEKLAEKGAERFSARGE DVSGDFEGKLEWKKSMWTDAMKAFGLKLNENA   | 646 |
| EKE48022.1 | TYQRI PRLIDKVLEEKGAKRLTSIGEGDNADD FEYSQEAWEDSFWKDIMKAFHIEAA--- | 637 |
| CCG48683.1 | TYQAV PRLIDEKLAEKGAERFSSRGE DVSGDFEGKLEWKKSMWTDAMKAFGLKLNENA   | 646 |
| AFJ60789.1 | TYQAV PRLIDEKLAEKGAERFSSRGE DVSGDFEGKLEWKKSMWTDAMKAFGLKLNENA   | 653 |
| AFJ62808.1 | TYQRI PRLIDKVLEEKGAKRLTSIGEGDNADD FEYSQEAWEDSFWKDIMKAFHIEAA--- | 637 |
| EEK66903.1 | TYQRI PRYIDEQMAQKGATRF STRGEADASGDFEEQLEQWKESMWSDAMKAFGLELKNM  | 664 |
| EJQ52935.1 | TYQRI PRYIDEQMAQKGATRF STRGEADASGDFEEQLEQWKQSMWSDAMKAFGLELKNM  | 650 |
| EJS69574.1 | TYQRI PRYIDEQMAQKGATRF STRGEADASGDFEEQLEQWKQSMWSDAMKAFGLELKNM  | 650 |
| EJV63294.1 | TYQRI PRYIDEQMAQKGATRF STRGEADASGDFEEQLEQWKQSMWSDAMKAFGLELKNM  | 650 |
| EKF35778.1 | TYQRI PRLIDEALERKGAKRLTDIGEGDAGGDMDEDKEIFQKTVFEDLAKEFDLTLQ---  | 635 |
| EGP08506.1 | TYQSV PRLDEQLAAHGAKSVYTRGEGDARD DLDGQFQKWFPAQAQVATKEFGIDW----  | 653 |
| BAL78328.1 | TYQSV PRFIDEQLSKHGGRVYPRGEGDARS DLDGQFQKWFPAQAQVATKEFGIDW----  | 649 |
| BAC48147.1 | TYQSV PRFIDEQLSGHGGRVYPRGEGDARS DLDGQFQKWFPAQAQVATKEFGIDW----  | 650 |
| BAL12135.1 | TYQSV PRFIDEQLSKHGGRVYPRGEGDARS DLDGQFQKWFPAQAQVATKEFGIDW----  | 650 |

|            |                                                                  |     |
|------------|------------------------------------------------------------------|-----|
| CCE00185.1 | TYQSVPRFIDDALAAHGAKRVHERGEGDARSDDLGGQFETWFAALGAAAVKEFGLDS----    | 653 |
| EIG57609.1 | TYQSVPRFIDEQLSAHGARAVYPRGEGDARSDDLGGQFQKWFPAAAQVATKEFGIDW----    | 649 |
| EHR02046.1 | TYQSVPRFIDEQLSAHGARAVYPRGEGDARSDDLGGQFQKWFPAAAQVATKEFGIDW----    | 649 |
| EJN11211.1 | TYQSVPRFIDEQLSRHSARAIYPRGEGDARSDDLGGQFQKWFPAAAQVATKEFGIDW----    | 650 |
| CCF15606.1 | TYQQVPHLIDKQLEAKGATRLMKQGEGDASGDFEKQLEDWRHQLWPGVMNALGLKINENR     | 585 |
| CCF12687.1 | TYQDVPRFIDEQLTLKGAKRLSLRGEADTSGDFEKQLEDWQKRMWLDVMETFILQEN---     | 646 |
| ABB05850.1 | TYQAI PKRVDEALEKAGATRVHFRGELDSGGDFEFGFDRWYTEMWNRFAISAGKEIPV--    | 649 |
| EHP43606.1 | TYQAFPKRLHGFFSAAGAVPPLLARGEADGNGDFDHAAESWLAALWQSLQALRVEQGAA--    | 669 |
| ABF10339.1 | TYQAFPRRVDFDFITAGAVPPLLPRGEADGNGDFDQAAERWLAQLWQALQADG-----       | 638 |
| CAJ95800.1 | TYQAFPRRVYEFFTNAGASPLLPRGEADGNGDFDQAVERWLALLWQALQAGD---GVG--     | 668 |
| AEI79937.1 | TYQAFPRRVYEFFTNAGASPLLPRGEADGNGDFDQAAERWLASLWQALQAGD---SVG--     | 668 |
| AFD27790.1 | TYQAVPKQLDALLE DAGARRFCGRGEADARGDFFGGFADWYTFWIEFGTAFGPLQTP--     | 646 |
| ABC62112.1 | TFQVVPRKIDALMEQHGAERLVP AEELDARGDLDTQFHDWLDGLI PQLGDAFDIDLDES--  | 646 |
| EAQ27850.1 | TFQAVPRLIDARMEELGAKRIVPTTELDARSVDVTQFHTWLDALMPQLGEHFDDLDSG--     | 647 |
| EIT84377.1 | TYQAVPRQLEQLLLAKGATVFSMRGEGDV AHDVEQAWQHWKQHMWKDACETF DLKVEETD   | 636 |
| CCG43686.1 | TYQRVPTLIDEELQALGAERILAREGGDASEDFEGDLEKWEAALWPALADTFNLELEEAD     | 642 |
| ABX05160.1 | TYQAVPTQIDQHLQAAGAERLLQRGAADARSDFFGDFERWYAPFWQTHNQTFAIASAE--     | 639 |
| BAJ96920.1 | TYQAI PKRIDEKLAESGATRIKDRGEADAKGDFFGDFDQWNSTLWSTLSEKLGTKTVA--    | 642 |
| GAB96874.1 | TYQAVPTHLDEALARAGATRLVDRGEANARGDFFGDFDAWHEGLWPAIGEALGIDATPA-     | 698 |
| EFH80345.1 | TFQAI PRLVDSRLEQYGAQRIYPRGEGDAADDGDFGQFQAWYQLLWSELGQTLNLDLGA--   | 653 |
| EFH88481.1 | TYQAI PKLLDSALEQAGARRVYQRGEGDAAGDFGQFRSWYNGLWNSVAQALSLTPQE--     | 654 |
| EAW32450.1 | TYQRVPRLIEQRLETLGAECVARGEADARGDFFGDIDSYAKTVWPELAVSLGLTV----      | 642 |
| EIZ82104.1 | TYQAI PKRTDAALAKAGAQRVREGETDAGGDFFGGFDAWYAGLWADLGRALGQTGGRG-     | 643 |
| AEV70722.1 | TYQAVPKRIDERLTELGAMP LLPRAEADTSGDLTGTVEEFEVALWTAMAQHFGDPDAAPI    | 639 |
| EFC41452.1 | TYQRIPTFIDNKLSEAGGERIAQRGIGNAAKDLFCFDQWRKTLWSSFPDPTS-----        | 669 |
| ACV78954.1 | TYQAVPALIDRELVRI GGERLIDRGEGDSSGDL DGAFTRWRSRLWQALDAGRPGPP----   | 661 |
| ACV78964.1 | TYQAVPTLLDTELERHGATRVHPRGAGDAHADFDDQYRSWHAGLWADLATALGLPATA--     | 649 |
| ACV81379.1 | TYQAVPILLDAELERLGGTRIHPRGAGDAQADDFGQYRAWHADLWADLAAGLGLSERQ--     | 652 |
| EIZ78677.1 | TYQAI PKRIDAAMEGAGATRIKPRGETDAAGDFFGAFDAWYGNLWTDLGTALGKQA----    | 641 |
| EJW15291.1 | TYQSIPIFIDEQLAAKGANRLLPVGHGDASGEFETEVEEWRDKLWPAVMRSLDLKFDGID     | 644 |
| EJW16173.1 | TYQDVPRFVDEQMOKKGAERLMMRGEGDASGDFELNVESWRTKLWPDMMNVLGLOPTKQS     | 647 |
| EHQ58913.1 | TFQSVPTWIDGQMAAKGAKRLVPLGGGDVGGDFETEVENWRDQLWPAVMSSLGLSFQAME     | 645 |
| EHQ59900.1 | TYQQVPRFIDEALADKGATRLVARGEADASGDFEKQLEEWGDRLWQDVLNGLKSGGQP       | 644 |
| EHB66924.1 | TYQRI PRLIDEQLAIKGAQRLLPRGESDASGDFEREVD AWTAE LWPDLMQALGLPVI AVN | 645 |
| AFH60445.1 | TYQQVPRKIDALLADKGAKRLAGLGE G DVSDDFEQQLESWRGGLWPQVMEAFGLSLNENA   | 644 |
| AEI42011.1 | TYQQVPRKIDALLADKGAKRLAGLGE G DVSDDFEQQLESWRGGLWPQVMEAFGLSLNENA   | 644 |
| ADO57681.1 | TYQRI PRMIDELMTAKGAKRLYDRGEGDASGDFEKDWEVWNHGLWPELLNAFGIEHSDTE    | 643 |
| EGG32133.1 | TYQRI PRFIDEQLALKGAQR LIQRGESDASGDFEREVDEWTEHLWPDLMQALGLPVTA VH  | 647 |

|            |                                                                 |     |
|------------|-----------------------------------------------------------------|-----|
| EGL17662.1 | TYQDVPRRADELLASKGGQRLAGRGECDASGDFEKQLEDWREALRPDVMKALGLELAEIS    | 646 |
| ACX65034.1 | TYQRI PRLIDEQLSLKGGQRLIHRGESDASGDFEREVDEWTEHLWPDLMQSLGLPVTAVH   | 647 |
| ACT11327.1 | TYQAI PKRVDLALEHAGGERIHERGVADSGGDFFGNFDDWYTKLWPALTTAFGRQGAV--   | 646 |
| AEA28016.1 | TYQAI PTMLDEQLERHGGRRVVPRGEGDARSDFDGQYEAWYATLWPAMTEALGLETAA--   | 656 |
| EFP68091.1 | AFQAFPKRVEAMLAAAGAQAIVPRGEADGNAGFDAAVEAWTRSLWSALGARQ-----       | 651 |
| EGY61507.1 | AFQAFPKRVEAMLAAAGAQAIVPRGEADGNAGFDAAVEAWTRSLWSALGARQ-----       | 651 |
| EIE85788.1 | TYQRFPNKINQCLSEFGAERFFTSGEGDSDKMDMATFNDWCARFWSHLLGTYGIAASESN    | 758 |
| EIE92534.1 | TYQHFPKIKVSQCLSELGAERLFASGEGDNDKMDAAFNWDCARFWSHLLIHHGIAACESK    | 761 |
| BAE46296.1 | -----                                                           | 510 |
| BAH31604.1 | -----                                                           | 466 |
| EEN84644.1 | -----                                                           | 466 |
| EEN88978.1 | -----                                                           | 550 |
| ABG96413.1 | -----                                                           | 498 |
| BAH52971.1 | -----                                                           | 465 |
| EHI44575.1 | -----                                                           | 500 |
| EID73168.1 | -----                                                           | 465 |
| EHK83749.1 | -----                                                           | 441 |
| EJI96173.1 | -----                                                           | 465 |
| ABI79384.1 | -----                                                           | 497 |
| CAR47816.1 | -----                                                           | 498 |
| AEK26937.1 | -----                                                           | 473 |
| ABE39056.1 | TYQAI PRLVDERLAAHGGRNIFLRGEGDARDLLEGGQFESWFAKLGPLAVKEFGIDA----  | 650 |
| ABD08340.1 | TYQAI PRLIDERLAAHGGRNIFVRGEGDARDLLEGGQFEAWFATLGPLAVKEFGIDA----  | 647 |
| CAM03474.1 | TYQHVPTRIDARLAEELGGTRILERGEADASGDLGAVRRFSAALETALLERSGDPDAVAA    | 649 |
| EJF54063.1 | SYQAVPRKIDAQLQRLGAQPFLAPAEGNAKQNFVVSFNQWHDELWPALAKSLGQDAVS--    | 657 |
| AFC23737.1 | SYQAVPRKIDAQLKRLGAQPFLAPGEGNAKQNFVVSFNQWHDELWPALAKSLGQDAIS--    | 645 |
| ADG98903.1 | -----                                                           | 471 |
| EGI54680.1 | TWQAI PKRVDAALAKAGAQAQAFHPRGEGDAAGDLFGAFESWYADLWSSLAASEGREP---- | 637 |
| AEW97204.1 | TYQKVPTLIDERLAECCGATRLLEAAADAAGDLAGTVRGGFGEALRRALLAEYGDPSVGA    | 663 |
| CAJ88567.1 | -----                                                           | 516 |
| BAC68285.1 | TYQGFPKRIEAGLLAAGATRVIERGIADAAGDFDGMATRWMDTLWTTLAEY---AAD--     | 643 |
| BAC75137.1 | -----                                                           | 504 |
| EDY51256.1 | TYQRVPTLIDEQLTAAGSTPLVERAAVDVSADVATEVERWSGRVWGALLDRYGPVDPFAE    | 648 |
| EFG07822.1 | TYQRVPTLIDEQLTAAGSTPLVERAAVDVSADVATEVERWSGRVWGALLDRYGPVDPFAE    | 680 |
| EHN78335.1 | -----                                                           | 525 |
| CAB66201.1 | -----                                                           | 527 |
| EGG48117.1 | -----                                                           | 517 |
| EFL20831.1 | TYQRIPTLIDERLTAAGAVRLLERGAADASGDFAGTVDRWTGDLWTVLFDYRGAEGEAAA    | 655 |

|            |                                                               |     |
|------------|---------------------------------------------------------------|-----|
| EFL28515.1 | TYQRVPTLIDERLAALGATRLIDRAAADASGDLSGTVRDFTERLRTALLERHGD PATVGA | 650 |
| AEY93311.1 | -----                                                         | 542 |
| AEY93321.1 | TYQQVPTRIDARLAELGATRLTERAAADASGDLTGAVREFTARVRSALLSAYGDPDAGHD  | 650 |
| EFD71156.1 | -----                                                         | 529 |
| CBG67789.1 | TYQRVPALIDERLSAAGATALLERGAADASGDFAGTVDRWTGELWTTLLDRHGTAQDGVA  | 651 |
| CBG68112.1 | -----                                                         | 513 |
| EFL10082.1 | -----                                                         | 501 |
| EFF88741.1 | TYQRIPTLIDERLTAAGATPLLERCAADASGDFASVVDRWTEELWNALLEQHGEAAEGVA  | 652 |
| EDY58112.1 | -----                                                         | 506 |
| EFL36674.1 | -----                                                         | 510 |
| EFL36680.1 | TYQHVPTRIDERLAESGATRLLDRAAADASGDLTGTVREFTAALRTALLQQYGDPDATAP  | 700 |
| EFE65335.1 | -----                                                         | 526 |
| EGX54696.1 | -----                                                         | 491 |
| ACZ89135.1 | TYQAVPTMIDERLQGAGAQRVVARGEADAGDFFGDFERWYAPFWESLGD SLGVKEGG--  | 639 |
| ABD83817.1 | TYQSVPRLIDETLSAHGGKRVFPRGEGDARS DLGQFESWFAALGAAVKEFGLES----   | 650 |
| ADU39615.1 | TYQAVPRRIDERLEALGATRVHPRGEGDAREDMDGAFQDWS DALWPELVKAFGIKAG--- | 648 |
| EJL72014.1 | TYQAVPRRIDERLEALGATRVHPRGEGDAREDMDGAFQDWS DALWPELVKAFDIKTG--- | 649 |

```

sp|P14779.2|CPXB_PRIM2
ADF40088.1 -----EDNKS-----TSLQFVDSA-----ADMPLAKMHGAFS 664
ADE70259.1 -----EDNKS-----TSLQFVDSA-----ADMPLAKMHGAFS 664
AEN88827.1 -----EENAS-----TSLQFVDSA-----SDMPLAKMHRAFS 664
KFN05180.1 -----EDNKS-----TSLQFVDSA-----ADMPLAKMHGAFS 664
ACZ37122.1 -----EENAS-----TSLQFVDSA-----ADMPLAKMHRAFS 664
ADA57055.1 -----EDNKS-----TSLQFVDSA-----ADMPLAKMHGAFS 664
ADA57058.1 -----EENAS-----TSLQFVDSA-----ADMPLAKMHRAFS 664
ADA57059.1 -----EDNKS-----TSLQFVDSA-----ADMPLAKMHGAFS 664
ADA57061.1 -----EENAS-----TSLQFVDSA-----ADMPLAKMHRAFS 664
ADA57062.1 -----EDNKS-----TSLQFVDSA-----ADMPLAKMHGAFS 664
ADA57068.1 -----EENAS-----TSLQFVDSA-----ADMPLAKMHRAFS 664
AAT62301.1 -----EKERS-----TSLQFVSRSL-----GGSPLARTYEAVY 678
AAM54108.1 -GPR-----FR-----VVE-----SDAADGLGDLAS 660
EFQ83738.1 -----
EFL88452.1 DF--EETLDDAP-----LYEVTFLKD-A-----SQNPLVEQMGAKP 677
BAF89518.1 IGSAAEA- AEAP-----AVKVEVVNFAGAATGAAPRTGTRLDQGAQL 781
CBI43648.1 -P----KQTNKS-----QLSIEYVSEA-----AETPIAKTYKAFE 667
AEB22839.1 -----EKERS-----TLGLQFVSGL-----GGSPLAQTYEAVY 675
EDT22025.1 -----EKERS-----TSLQFVSRSL-----GGSPLARTYEAVY 678
AFH84458.1 -----EKERS-----TSLQFVSRSL-----GGSPLARTYEAVY 686
ADP31197.1 -----EKERS-----TSLQFVSRSL-----GGSPLARSYEAVH 675
ACP19384.1 -----EKERS-----TSLQFVSRSL-----GGSPLARTYEAVY 678
ADL27534.1 -----EKERS-----TSLQFVSRSL-----GGSPLARTYEAVY 678
ACO29732.1 -----EKERS-----TSLQFVSRSL-----GGSPLARTYEAVY 678
EDX65100.1 -----EKERS-----TSLQFVSRSL-----GGSPLARTYEAVY 678
EEK61456.1 -----EKERS-----TSLQFVSRSL-----GGSPLARTYEAVY 678
EEL16232.1 -----EKERS-----TSLQFVSRSL-----GGSPLARTYEAVY 686
EDZ53094.1 -----EKERS-----TSLQFVSRSL-----GGSPLARTYEAVY 678
EEL81346.1 -----
EEL87105.1 -----EKERS-----TSLQFVSRSL-----GGSPLARTYEAVY 692
EEL75761.1 -----EKERS-----TSLQFVSRSL-----GGSPLARTYEAVY 619
ACK88541.1 -----EKERS-----TSLQFVSRSL-----GGSPLARTYEAVY 678
EJQ05303.1 -----EKERS-----TSLQFVSRSL-----GGSPLARTYEAVY 678
EEK50040.1 -----EKERS-----TSLQFVSRSL-----GGSPLARTYEAVY 678
AAS42149.1 -----EKERS-----TSLQFVSRSL-----GGSPLARTYEAVY 678
AAP10153.1 -----EKERS-----TSLQFVSRSL-----GGSPLARTYEAVY 678
EEK83466.1 -----EKERS-----TSLQFVSRSL-----GGSPLARTYEAVY 686

```

|            |                                           |     |
|------------|-------------------------------------------|-----|
| ACK63698.1 | -----EKERS-----TSLQFVSRL-----GGSPARTYEAVY | 619 |
| EJS57156.1 | -----EKERS-----TSLQFVSRL-----GGSPARTYEAVY | 678 |
| EJS56605.1 | -----EKERS-----TSLQFVSRL-----GGSPARTYEAVY | 678 |
| EJS68951.1 | -----EKERS-----TSLQFVSGL-----GGSPARSYEAMN | 677 |
| EJQ10567.1 | -----EKERS-----TSLQFVSRL-----GGSPARTYEAVY | 678 |
| EJQ13433.1 | -----EKERS-----TSLQFVSRL-----GGSPARTYEAVY | 678 |
| EJQ20399.1 | -----EKERS-----TSLQFVSRL-----GGSPARTYEAVY | 678 |
| EJQ30236.1 | -----EKERS-----TSLQFVSRL-----GGSPARTYEAVY | 678 |
| EJQ51278.1 | -----EKERS-----TSLQFVSGL-----GGSPARSYEAMN | 677 |
| EEL10858.1 | -----EKERS-----TSLQFVSRL-----GGSPARTYEAVY | 678 |
| EEL05393.1 | -----EKERS-----TSLQFVSRL-----GGSPARTYEAVY | 692 |
| EEK94080.1 | -----EKERS-----TSLQFVSRL-----GGSPARTYEAVY | 681 |
| EEK99882.1 | -----EKERS-----TSLQFVSRL-----GGSPARTYEAVY | 681 |
| EEK55784.1 | -----EKERS-----TSLQFVSRL-----GGSPARTYEAVY | 686 |
| ADK05784.1 | -----EKERS-----TSLQFVSRL-----GGSPARTYEAVY | 678 |
| AAU17340.1 | -----EKERS-----TSLQFVSRL-----GGSPARTYEAVY | 678 |
| EEL64394.1 | -----EKERS-----TSLQFVSRL-----GGSPARTYEAVY | 678 |
| AEW56259.1 | -----EKERS-----TSLQFVSRL-----GGSPARTYEAVY | 678 |
| AFQ11690.1 | -----EKERS-----TSLQFVSRL-----GGSPARTYEAVY | 678 |
| EAL16831.1 | -----EKERS-----TSLQFVSRL-----GGSPARTYEAVY | 678 |
| ACK94296.1 | -----EKERS-----TSLQFVSRL-----GGSPARTYEAVY | 678 |
| EDZ58760.1 | -----EKERS-----TSLQFVSRL-----GGSPARTYEAVY | 678 |
| EJV84218.1 | -----EKERS-----TSLQFVSRL-----GGSPARTYEAVY | 678 |
| EJQ69212.1 | -----EKERS-----TSLQFVSRL-----GGSPARTYEAVY | 678 |
| EJQ80339.1 | -----EKERS-----TSLQFVSCL-----GGSPARTYEAVY | 678 |
| EJV81602.1 | -----EKERS-----TSLQFVSRL-----GGSPARTYEAVY | 678 |
| EJQ95474.1 | -----EKERS-----TSLQFVSRL-----GGSPARTYEAVY | 678 |
| EEK44229.1 | -----EKERS-----TSLQFVSRL-----GGSPARTYEAVY | 686 |
| EEK88560.1 | -----EKERS-----TSLQFVSRL-----GGSPARTYEAVY | 678 |
| EJR07451.1 | -----EKERS-----TSLQFVSRL-----GGSPARTYEAVY | 675 |
| EJR16542.1 | -----EKERS-----TSLQFVSRL-----GGSPARTYEAVY | 678 |
| BAL18840.1 | -----EKERS-----TSLQFVSRL-----GGSPARTYEAVY | 678 |
| EDX69960.1 | -----EKERS-----TSLQFVSRL-----GGSPARTYEAVY | 678 |
| ACM13462.1 | -----EKERS-----TSLQFVSRL-----GGSPARTYEAVY | 678 |
| EEK75631.1 | -----EKERS-----TSLQFVSRL-----GGSPARTYEAVY | 678 |
| EEL25491.1 | -----EKERS-----TSLQFVSRL-----GGSPARTYEAVY | 619 |
| EEL21990.1 | -----EKERS-----TSLQFVSRL-----GGSPARTYEAVY | 686 |
| EEL33825.1 | -----EKERS-----TSLQFVSRL-----GGSPARTYEAVY | 686 |

|                        |                                               |     |
|------------------------|-----------------------------------------------|-----|
| EEL44933.1             | -----EKERS-----TSLQFVSRL-----GGSPARTYEAVY     | 686 |
| EEL50167.1             | -----EKERS-----TSLQFVSGL-----GGSPARSYEAVN     | 756 |
| EJR22930.1             | -----EKERS-----TSLQFVSRL-----GGSPARTYEAVY     | 678 |
| EJP91231.1             | -----EKERS-----TSLQFVSRL-----GGSPARTYEAVY     | 678 |
| EJR37623.1             | -----EKERS-----TSLQFVSRL-----GGSPARTYEAVY     | 678 |
| EJR50635.1             | -----EKERS-----TSLQFVSRL-----GGSPARTYEAVY     | 678 |
| EJR64551.1             | -----EKERS-----TSLQFVSRL-----GGSPARTYEAVY     | 678 |
| EJR75620.1             | -----EKERS-----TSLQFVSRL-----GGSPARTYEAVY     | 678 |
| EJR82049.1             | -----EKERS-----TSLQFVSRL-----GGSPARTYEAVY     | 678 |
| EJR83659.1             | -----EKERS-----TSLQFVSRL-----GGSPARTYEAVY     | 678 |
| EJR91135.1             | -----EKEQN-----TLNIQFVNNL-----VETPLAKSSEVLH   | 675 |
| EJR97241.1             | -----EKERS-----TSLQFVSRL-----GGSPARTYEAVY     | 678 |
| EJS05852.1             | -----EKERS-----TSLQFVSRL-----GGSPARTYEAVY     | 678 |
| EDX58768.1             | -----EKERS-----TSLQFVSRL-----GGSPARTYEAVY     | 678 |
| AAU24352.1             | -Q----TETDRQ-----ALSVEFVNAP-----AASPLAKAYQVFT | 674 |
| ABY44122.1             | -----EKERS-----TSLQFVSRL-----GGSPARTYEAVY     | 678 |
| EDW23201.1             | -E----KGKENP-----KLSVAYTNEL-----VERPVAKTYGAFS | 665 |
| ABV62358.1             | -E----KGKETP-----KLSVAYTNEL-----VERPVAKTYGAFS | 665 |
| EIF12263.1             | -----EKERS-----ALGLQFVSGL-----GGSPLAQTYEAVY   | 674 |
| EIF14027.1             | -P----KQTNKS-----QLSIEYVSEA-----AETPIAKTYKAFE | 667 |
| EHL75405.1             | -----EKERS-----TSLQFVSRL-----GGSPARTYEAVY     | 678 |
| EJD67577.1             | -----EKERS-----ALGLQFVSGL-----GGSPLAQTYEAVY   | 674 |
| EJD68347.1             | -P----KQTNKS-----QLSIEYVSEA-----AETPIAKTYKAFE | 667 |
| EFV73436.1             | -Q----TETDRQ-----ALSVEFVNAP-----AASPLAKAYQVFT | 688 |
| CBY93692.1             | -----EKERS-----TSLQFVSRL-----GGSPARTYEAVY     | 678 |
| AFI27355.1             | -----DKERS-----TSLQFVRGL-----GESPLARSYEAAH    | 675 |
| AFI29229.1             | -A----QKEDRP-----SLSITFLSEA-----TETPVAKAYGAFE | 667 |
| EIL85422.1             | -E----KRQEKP-----NLSIAYTNEL-----VERPVAKTYGAFS | 665 |
| ADV93500.1             | -A----QKEDRP-----SLSIAFLSEA-----TETPVAKAYGAFE | 667 |
| ADV95715.1             | -----DKERS-----TSLQFVRGL-----GESPLARSYEASH    | 675 |
| BAI84248.1             | -----DKERS-----TSLQFVRGL-----GESPLARSYEASH    | 675 |
| EFG90288.1             | -S----QKEDRP-----SLSIAFLSEA-----TETPLAKAYGAFE | 667 |
| EFG91781.1             | -----DKERS-----TSLQFVRGL-----GESPLARSYEAAH    | 675 |
| AEP85668.1             | -----DKERS-----TSLQFVRGL-----GESPLARSYEASH    | 675 |
| AEP87558.1             | -A----QKEDRP-----SLSITFLSEA-----TETPLAKAYGAFE | 667 |
| sp O08336.1 CYPB_BACSU | -A----QKEDRP-----SLSITFLSEA-----TETPVAKAYGAFE | 667 |
| sp O08394.1 CYPD_BACSU | -----DKERS-----TSLQFVRGL-----GESPLARSYEASH    | 675 |
| AEP89812.1             | -----DKERS-----TSLQFVRGL-----GESPLARSYEASH    | 675 |

|            |        |               |                  |                |     |
|------------|--------|---------------|------------------|----------------|-----|
| AEP91702.1 | -A---- | QKEDRP-----   | SLSITFLSEA-----  | TETPVAKAYGAFE  | 667 |
| EHA31094.1 | -A---- | QKEDRP-----   | SLSIAFLSEA-----  | TETPVAKAYGAFE  | 669 |
| ADH07708.1 | -----  | EKERS-----    | TLSQLQFVSRL----- | GG SPLARTYEAVY | 678 |
| EEM28177.1 | -----  | EKERS-----    | TLSQLQFVSRL----- | GG SPLARTYEAVY | 678 |
| AFQ14162.1 | -----  | EKERS-----    | TLSQLQFVSRL----- | GG SPLARTYEAVY | 678 |
| EEM95517.1 | -----  | EKERS-----    | TLSQLQFVSRL----- | GG SPLARTYEAVY | 678 |
| EEN02344.1 | -----  | EKERS-----    | TLSQLQFVSRL----- | GG SPLARTYEAVY | 678 |
| AFU13781.1 | -----  | EKERS-----    | TLSQLQFVSRL----- | GG SPLARTYEAVY | 686 |
| EEM70897.1 | -----  | EKERS-----    | TLSQLQFVSRL----- | GG SPLARTYEAVY | 686 |
| ADY22413.1 | -----  | EKERS-----    | TLSQLQFVSRL----- | GG SPLARTYEAVY | 678 |
| EEM82895.1 | -----  | EKERS-----    | TLSQLQFVSRL----- | GG SPLARTYEAVY | 678 |
| EEM52818.1 | -----  | EKERS-----    | TLSQLQFVSRL----- | GG SPLARTYEAVY | 678 |
| EEM59126.1 | -----  | EKERS-----    | TLSQLQFVSRL----- | GG SPLARTYEAVY | 686 |
| EEM47193.1 | -----  | EKERS-----    | TLSQLQFVSRL----- | GG SPLARTYEAVY | 619 |
| EEM76899.1 | -----  | EKERS-----    | TLSQLQFVSRL----- | GG SPLARTYEAVY | 686 |
| EEM88909.1 | -----  | EKERS-----    | TLSQLQFVSRL----- | GG SPLARTYEAVY | 686 |
| EEM38196.1 | -----  | EKERS-----    | TLSQLQFVSRL----- | GG SPLARTYEAVY | 678 |
| EEM21858.1 | -----  | EKERS-----    | TLSQLQFVSRL----- | GG SPLARTYEAVY | 681 |
| ABK86139.1 | -----  | EKERS-----    | TLSQLQFVSRL----- | GG SPLARTYEAVY | 686 |
| EJQ37805.1 | -----  | EKERS-----    | TLSQLQFVSRL----- | GG SPLARTYEAVY | 678 |
| CCF04242.1 | -----  | EKERS-----    | ALGLQFVSGL-----  | GG SPLAQTYEAVY | 674 |
| CCF05972.1 | -P---- | KQANKS-----   | QLSIEYVSEA-----  | AETPIAKTYKAFE  | 667 |
| ABS73124.1 | -----  | EKERS-----    | ALGLQFVSGL-----  | GG SPLAQTYEAVY | 674 |
| ABS74786.1 | -P---- | KQTNKS-----   | QLSIEYVSEA-----  | AETPIAKTYKAFE  | 667 |
| EKE46398.1 | -----  | EKERS-----    | ALGLQFVSGL-----  | GG SPLAQTYEAVY | 674 |
| EKE48022.1 | -P---- | KQANKS-----   | QLSIEYVSEA-----  | AETPIAKTYKAFE  | 667 |
| CCG48683.1 | -----  | EKERS-----    | SLGLQFVSGL-----  | GG SPLAQTYEAVY | 674 |
| AFJ60789.1 | -----  | EKERS-----    | SLGLQFVSGL-----  | GG SPLAQTYEAVY | 681 |
| AFJ62808.1 | -P---- | KQTNKS-----   | QLSIEYVSEA-----  | AETPIAKTYKAFE  | 667 |
| EEK66903.1 | -----  | EKERS-----    | TLSQLQFVSRL----- | GG SPLARTYEAVY | 692 |
| EJQ52935.1 | -----  | EKERS-----    | TLSQLQFVSRL----- | GG SPLARTYEAVY | 678 |
| EJS69574.1 | -----  | EKERS-----    | TLSQLQFVSRL----- | GG SPLARTYEAVY | 678 |
| EJV63294.1 | -----  | EKERS-----    | TLSQLQFVSRL----- | GG SPLARTYEAVY | 678 |
| EKF35778.1 | -E---- | KSQESP-----   | DLSVYYTNEL-----  | VERPVAKTYGAFS  | 665 |
| EGP08506.1 | SF--   | ARSADDAP----- | LYQLEPVAP-T----- | AVNTIVVQGGVVQ  | 686 |
| BAL78328.1 | NF--   | TRTAEDDP----- | LYAIEPVAV-T----- | AVNTIVAQGGAVA  | 682 |
| BAC48147.1 | NF--   | TRTAEDDP----- | LYAIEPVAV-T----- | AVNTIVAQGGAVA  | 683 |
| BAL12135.1 | NF--   | TRTAEDDP----- | LYAIEPVAV-T----- | AVNTIVAQGGAVA  | 683 |

|            |                                                           |     |
|------------|-----------------------------------------------------------|-----|
| CCE00185.1 | GF--SRSAEDAP-----LYSVEPLAP-T-----AAGAVAALGGAAP            | 686 |
| EIG57609.1 | NF--TRTAEDDP-----LYAIEPVAV-T-----AVNTIVAQGGAVA            | 682 |
| EHR02046.1 | NF--TRTAEDDP-----LYAIEPVAV-T-----AVNTIVAQGGAVA            | 682 |
| EJN11211.1 | NF--TRTAEDDP-----LYAIEPVAV-T-----                         | 670 |
| CCF15606.1 | -----ERERS-----TLSVQYVNGI-----AGVPLAESYDALR               | 613 |
| CCF12687.1 | -L----EEKHHG-----TLTIQFMNDL-----SDVPLALKYNAVY             | 676 |
| ABB05850.1 | -----IQHDDV-----ALKVSFAGSS-----REKVLNLGDMAH               | 677 |
| EHP43606.1 | -----PDAAGAS-----QIAVRLRDI-A-----TIRASTLPPSTQA            | 699 |
| ABF10339.1 | -----AGTGGL-----GVDVQVRSM-A-----AIRAETLPAGTQA             | 667 |
| CAJ95800.1 | -----GPAHGTP-----PVRVQVKDV-A-----EIRASTLPANTEA            | 698 |
| AEI79937.1 | -----GPAHGTP-----PVRVQMRDV-A-----EIRASTLPANTQG            | 698 |
| AFD27790.1 | -----APGPAT-----DAGAQIQRGA-----RPRLLRQGDLOT               | 674 |
| ABC62112.1 | ----GFDVAFEP-----LYTVEITDS-I-----TGNTVADRVGARE            | 677 |
| EAQ27850.1 | ----EAAGIAEP-----LYKVEVTQS-V-----TANTVASRVGAHA            | 678 |
| EIT84377.1 | -----VPSVA-----ALEVEWVTHE-----KTLPLLDHYGAFK               | 664 |
| CCG43686.1 | -----DPSS-----HVSMEFVSGV-----TQTPLARTHHAFT                | 669 |
| ABX05160.1 | -----INSKP-----LYKVPELLPSS-----SDQLAQQTGFMF               | 666 |
| BAJ96920.1 | -----TTAEP-----MFEVEIVKET-----RSVFLRQTDLQP                | 669 |
| GAB96874.1 | -----ADAP-----QLSVDIIGPG-----REQLLRASDLQL                 | 724 |
| EFH80345.1 | -----SDAATGP-----RYEVEVLTETE-----APNPFVASFGAHG            | 684 |
| EFH88481.1 | ----EVKRQYRP-----RYDIEIIRR-P-----HPYPFINSFGAQP            | 685 |
| EAW32450.1 | ----AAPVDRGD-----RFTVDLLTDND-----RDTVFLQHHS LTP           | 674 |
| EIZ82104.1 | -GDREAAEPAGT-----GLDVEILRSG-----RETALHLTDLNP              | 676 |
| AEV70722.1 | SD-----TDEP-----LYDLRPIEG-P-----VTTALDERFMVVP             | 668 |
| EFC41452.1 | -----HELP-----PVETTIKGH-----RETILHFQSLEP                  | 695 |
| ACV78954.1 | ---RETRNPVGRYVASEVGRASADGPADAFGMGEAWVRSV-----TELTRRPPDLG- | 709 |
| ACV78964.1 | ----AEPAAAGP-----RLSITIVNR-Q-----LANPVVLSYEAQA            | 680 |
| ACV81379.1 | ----AQVTAAGP-----RLTIATVNR-Q-----LTNPVVVSYDATP            | 683 |
| EIZ78677.1 | -----AATVAP-----GLDVEIVRSG-----RLEALRLPDLGQ               | 669 |
| EJW15291.1 | GI----EKSTAS-----SLTVEVVNIS-----VESPFADAYNVHC             | 675 |
| EJW16173.1 | -----EGARS-----TLTVEFVKDY-----AGSRLAQSYEAVH               | 675 |
| EHQ58913.1 | -----HQAGP-----DLSVDVVRGM-----IEAPLAESYDAHY               | 673 |
| EHQ59900.1 | -----HRERT-----TLSIQFVSGL-----IGTPLAETYDALL               | 672 |
| EHB66924.1 | -----ETKRS-----SLSVQFVPGA-----AAVPLANTYHAAC               | 673 |
| AFH60445.1 | -----GQERS-----SLTVQFVSGL-----IGTPLAESYDALQ               | 672 |
| AEI42011.1 | -----GQERS-----SLTVQFVSGL-----IGTPLAESYDALQ               | 672 |
| ADO57681.1 | -----PQDTS-----SLSIEFVSDV-----LSAPLAANYEAAAT              | 671 |
| EGG32133.1 | -----GLKRS-----ALSVRFVQGA-----AAVPLAETYRAVT               | 675 |

|            |                                                 |     |
|------------|-------------------------------------------------|-----|
| EGL17662.1 | -----EKEKS-----SLSLQFVSGF-----AGTPLAESYDAVH     | 674 |
| ACX65034.1 | -----GQKRS-----ALSVQFVQGT-----AAVPLTETYRAVT     | 675 |
| ACT11327.1 | -----AEDAT-----ELELEFVHTD-----RVSTLQIPDMGR      | 673 |
| AEA28016.1 | ----VGTAAGP-----RLTVTMTNR-Q-----TTNPVVVSYRARP   | 687 |
| EFP68091.1 | -----AQADGP-----SVHVDYVAP-D-----AVRAATLPSAARA   | 680 |
| EGY61507.1 | -----AQADGP-----SVHVDYVAP-D-----AVRAATLPSAARA   | 680 |
| EIE85788.1 | SVVPSAAAAKES-----IVKVKFIQPSN---KEAWEKAANDFYGSPN | 797 |
| EIE92534.1 | PVVPTAA-IKES-----SVDIKFVQPSD---KEAWNSAINNHYGPNP | 799 |
| BAE46296.1 | -----                                           | 510 |
| BAH31604.1 | -----                                           | 466 |
| EEN84644.1 | -----                                           | 466 |
| EEN88978.1 | -----                                           | 550 |
| ABG96413.1 | -----                                           | 498 |
| BAH52971.1 | -----                                           | 465 |
| EHI44575.1 | -----                                           | 500 |
| EID73168.1 | -----                                           | 465 |
| EHK83749.1 | -----                                           | 441 |
| EJI96173.1 | -----                                           | 465 |
| ABI79384.1 | -----                                           | 497 |
| CAR47816.1 | -----                                           | 498 |
| AEK26937.1 | -----                                           | 473 |
| ABE39056.1 | KF--ARAVDDAP-----LYRIEVPVAP-A-----AGNAVAAAGGAVP | 683 |
| ABD08340.1 | AF--DRGADDTP-----LYGIEPLAP-A-----ASQPLAATGVAVA  | 680 |
| CAM03474.1 | AP-E---GDGP-----AYTVSEVTG-G-----ALDSLAARHGMVE   | 679 |
| EJF54063.1 | -----PIKKK-----SYKVQLLHDW-----HAEALGENDFVR      | 684 |
| AFC23737.1 | -----PINKK-----SYKVQLLHDW-----HAQTLGENDFVR      | 672 |
| ADG98903.1 | -----                                           | 471 |
| EGI54680.1 | -----AVQAQP-----RIDVEVRRGT-----RERLLKLDELQR     | 665 |
| AEW97204.1 | VA-----GAED-----GYEVTEVTG-G-----PLDALAARHEVVA   | 692 |
| CAJ88567.1 | -----                                           | 516 |
| BAC68285.1 | -----TSETTGP-----RFEVQLLTE-A-----EVRPAIVSEQAYP  | 673 |
| BAC75137.1 | -----                                           | 504 |
| EDY51256.1 | ADAERPAVPTG-----PRH-TVTD-T-D-----AAPGLPVPDGLVP  | 682 |
| EFG07822.1 | ADAERPAVPTG-----PRH-TVTD-T-D-----AAPGLPVPDGLVP  | 714 |
| EHN78335.1 | -----                                           | 525 |
| CAB66201.1 | -----                                           | 527 |
| EGG48117.1 | -----                                           | 517 |
| EFL20831.1 | VETEADH--DAG-----LYELQD-TD-S-----VIGELAARHGVQS  | 688 |

|            |                                                 |     |
|------------|-------------------------------------------------|-----|
| EFL28515.1 | AP-AADAADDGP-----AYTVTEVTG-G-----PLDGLARQHGMVA  | 684 |
| AEY93311.1 | -----                                           | 542 |
| AEY93321.1 | TT-----DEPAH-----AYAVRTLSTG-G-----PLDALAERHGLVP | 680 |
| EFD71156.1 | -----                                           | 529 |
| CBG67789.1 | AQPDTDA--EGG-----LYVLEDTTD-S-----VIGGLAARHGVQP  | 684 |
| CBG68112.1 | -----                                           | 513 |
| EFL10082.1 | -----                                           | 501 |
| EFF88741.1 | ATAEPQD--GER-----LYEIQDAPD-S-----VIGELAARHGVQP  | 685 |
| EDY58112.1 | -----                                           | 506 |
| EFL36674.1 | -----                                           | 510 |
| EFL36680.1 | DT-----GEPTA-----AYEVRTLSTG-G-----PLDALAERHGLVP | 730 |
| EFE65335.1 | -----                                           | 526 |
| EGX54696.1 | -----                                           | 491 |
| ACZ89135.1 | -----VETGP-----LYEVEVIPSP-----SAELVAQNRLGL      | 666 |
| ABD83817.1 | RF--SRSADDAP-----LYSVEPVAP-S-----AVNAVAALGGTVP  | 683 |
| ADU39615.1 | -A--DTPAEAEP-----LYTLEELPP-P-----QKNALVDALGAVA  | 680 |
| EJL72014.1 | -A--DSPAQSEP-----LYTLEELPP-P-----QKNAIVDALGAVA  | 681 |

|                        |                                                          |     |
|------------------------|----------------------------------------------------------|-----|
| sp P14779.2 CPXB_PRIM2 | TNVVASKELQQPG-----SARSTRHLEIELP-----KEASYQEGDHLGVIPRN    | 707 |
| ADF40088.1             | TNVVASKELQQPG-----SARSTRHLEIELP-----KEASYQEGDHLGIIPRN    | 707 |
| ADE70259.1             | ANVVASKELQKPG-----SARSTRHLEIELP-----KEASYQEGDHLGVIPRN    | 707 |
| AEN88827.1             | ANVVASKELQQPG-----SERSTRHLEIELP-----KEASYQEGDHLGVIPRN    | 707 |
| KFN05180.1             | TNVVASKELQQPG-----SARSTRHLEIELP-----KEASYQEGDHLGVIPRN    | 707 |
| ACZ37122.1             | ANVVASKELQKPG-----SARSTRHLEIELP-----KEASYQEGDHLGVIPRN    | 707 |
| ADA57055.1             | ANVVASKELQQLG-----SERSTRHLEIALP-----KEASYQEGDHLGVIPRN    | 707 |
| ADA57058.1             | ANVVASKELQKPG-----SARSTRHLEIELP-----KEASYQEGDHLGVIPRN    | 707 |
| ADA57059.1             | ANVVASKELQQLG-----SERSTRHLEIALP-----KEASYQEGDHLGVIPRN    | 707 |
| ADA57061.1             | ANVVASKELQKPG-----SARSTRHLEIELP-----KEASYQEGDHLGVIPRN    | 707 |
| ADA57062.1             | ANVVASKELQQPG-----SERSTRHLEIALP-----KEASYQEGDHLGVIPRN    | 707 |
| ADA57068.1             | ANVVASKELQKPG-----SARSTRHLEIELP-----KEASYQEGDHLGVIPRN    | 707 |
| AAT62301.1             | ASILENRELQSSS-----SERSTRHIEISLP-----EGATYKEGDHLGVLPIN    | 721 |
| AAM54108.1             | AVVLENRELVR-----GPDAGSKRHLELRP-----DGTSYRTGDYLSVLPQN     | 703 |
| EFQ83738.1             | -----                                                    | 505 |
| EFL88452.1             | VVVRRTRELHSKSGP-----VPSESTRHIRVKLA-----PGQSYTAGDHLSVIPRN | 724 |
| BAF89518.1             | SRIRVNRELLSPG-----AQGSTRHIEIPLP-----AGTSYAAGDHLAVFPVN    | 824 |
| CBI43648.1             | AEVTTNKELHTES-----SKRSVRHIELRLP-----ETETYQEGDHLGVLPQN    | 710 |
| AEB22839.1             | ASVAENRELQAPE-----SDRSTRHIEIILP-----KEAAYNEGDHLGVLPVN    | 718 |
| EDT22025.1             | ASILENRELQSSS-----SERSTRHIEISLP-----EGATYKEGDHLGVLPIN    | 721 |
| AFH84458.1             | ASILENRELQSSS-----SERSTRHIEISLP-----EGATYKEGDHLGVLPIN    | 729 |
| ADP31197.1             | ASVTENRELQAD-----SDRSTRHIEIALP-----PGVTYQEGDHLGVLPVN     | 718 |
| ACP19384.1             | ASILENRELQSPS-----SDRSTRHIEVSLP-----EGATYKEGDHLGVLPVN    | 721 |
| ADL27534.1             | ASILENRELQSSS-----SDRSTRHIEVSLP-----EGATYKEGDHLGVLPVN    | 721 |
| ACO29732.1             | ASILENRELQSSS-----SERSTRHIEISLP-----EGATYKEGDHLGVLPIN    | 721 |
| EDX65100.1             | ASILENRELQSSS-----SERSTRHIEISLP-----EGATYKEGDHLGVLPIN    | 721 |
| EEK61456.1             | ASILENRELQSSS-----SDRSTRHIEVSLP-----EGATYKEGDHLGVLPVN    | 721 |
| EEL16232.1             | ASILENRELQSSS-----SERSTRHIEISLP-----EGATYKEGDHLGVLPIN    | 729 |
| EDZ53094.1             | ASILENRELQSSS-----SDRSTRHIEVSLP-----EGATYKEGDHLGVLPVN    | 721 |
| EEL81346.1             | -----                                                    | 663 |
| EEL87105.1             | ASILENRELQSSS-----SERSTRHIEISLP-----EGATYQEGDHLGVLPIN    | 735 |
| EEL75761.1             | ASILENRELQSSS-----SDRSTRHIEVSLP-----EGATYKEGDHLGVLPVN    | 662 |
| ACK88541.1             | ASILENRELQSSS-----SERSTRHIEISLP-----EGATYKEGDHLGVLPIN    | 721 |
| EJQ05303.1             | ASILENRELQSSS-----SERSTRHIEISLP-----EGATYKEGDHLGVLPIN    | 721 |
| EEK50040.1             | ASILENRELQSSS-----SDRSTRHIEVSLP-----EGATYKEGDHLGVLPVN    | 721 |
| AAS42149.1             | ASILENRELQSSS-----SERSTRHIEISLP-----EGATYKEGDHLGVLPIN    | 721 |
| AAP10153.1             | ASILENRELQSSS-----SDRSTRHIEVSLP-----EGATYKEGDHLGVLPVN    | 721 |
| EEK83466.1             | ASILENRELQSSS-----SERSTRHIEISLP-----EGATYKEGGHLGVLPIN    | 729 |

|            |                                                       |     |
|------------|-------------------------------------------------------|-----|
| ACK63698.1 | ASILENRELQSSS-----SDRSTRHIEVSLP-----EGATYKEGDHLGVLPVN | 662 |
| EJS57156.1 | ASILENRELQSPS-----SDRSTRHIEVSLP-----EGATYKEGDHLGVLPVN | 721 |
| EJS56605.1 | ASILENRELQSSS-----SERSTRHIEISLP-----EGATYQEGDHLGVLPIN | 721 |
| EJS68951.1 | ATIVENRELQSAG-----SDRSTRHIEVALP-----QGVTYHEGDHLGVLPHN | 720 |
| EJQ10567.1 | ASILENRELQSSS-----SDRSTRHIEVSLP-----EGATYKEGDHLGVLPVN | 721 |
| EJQ13433.1 | ASILENRELQSSS-----SDRSTQHIEISLP-----EGATYQEGDHLGVLPIN | 721 |
| EJQ20399.1 | ASILENRELQSSS-----SDRSTRHIEVSLP-----EGATYKEGDHLGVLPVN | 721 |
| EJQ30236.1 | ASILENRELQSSS-----SDRSTRHIEVSLP-----EGATYKEGDHLGVLPVN | 721 |
| EJQ51278.1 | ATIVENRELQSAG-----SDRSTRHIEVALP-----QGVTYHEGDHLGVLPHN | 720 |
| EEL10858.1 | ASILENRELQSSS-----SDRSTRHIEVSLP-----EGATYKEGDHLGVLPVN | 721 |
| EEL05393.1 | ASILENRELQSSS-----SERSTRHIEISLP-----EGATYQEGDHLGVLPIN | 735 |
| EEK94080.1 | ASILENRELQSSS-----SDRSTRHIEVSLP-----EGATYKEGDHLGVLPVN | 724 |
| EEK99882.1 | ASILENRELQSSS-----SERSTRHIEISLP-----EGATYKEGDHLGVLPIN | 724 |
| EEK55784.1 | ASILENRELQSSS-----SERSTRHIEISLP-----EGATYKEGDHLGVLPIN | 729 |
| ADK05784.1 | ASILENRELQSSS-----SERSTRHIEISLP-----EGATYKEGDHLGVLPIN | 721 |
| AAU17340.1 | ASILENRELQSSS-----SERSTRHIEISLP-----EGATYKEGDHLGVLPIN | 721 |
| EEL64394.1 | ASILENRELQSSS-----SDRSTRHIEVSLP-----EGATYKEGDHLGVLPVN | 721 |
| AEW56259.1 | ASILENRELQSSS-----SERSTRHIEISLP-----EGATYKEGDHLGVLPIN | 721 |
| AFQ11690.1 | ASILENRELQSSS-----SERSTRHIEISLP-----EGATYKEGDHLGVLPIN | 721 |
| EAL16831.1 | ASILENRELQSSS-----SERSTRHIEISLP-----EGATYKEGDHLGVLPIN | 721 |
| ACK94296.1 | ATILENRELQSSS-----SDRSTRHIEVSLP-----EGATYQEGDHLGVLPIN | 721 |
| EDZ58760.1 | ASILENRELQSSS-----SERSTRHIEISLP-----EGATYKEGDHLGVLPIN | 721 |
| EJV84218.1 | ASILENRELQSSS-----SERSTRHIEISLP-----EGATYQEGDHLGVLPIN | 721 |
| EJQ69212.1 | ASILENRELQSSS-----SERSTRHIEISLP-----EGATYQEGDHLGVLPIN | 721 |
| EJQ80339.1 | ASVLENRELQLSS-----SDRSTRHIEISLP-----EGATYQEGDHLGVLPIN | 721 |
| EJV81602.1 | ASILENRELQSPS-----SDRSTRHIEVSLP-----EGATYKEGDHLGVLPVN | 721 |
| EJQ95474.1 | ASILENRELQSSS-----SERSTRHIEISLP-----EGATYKEGDHLGVLPIN | 721 |
| EEK44229.1 | ASILENRELQSSS-----SERSTRHIEISLP-----EGATYKEGDHLGVLPIN | 729 |
| EEK88560.1 | ASILENRELQSPS-----SDRSTRHIEVSLP-----EGATYKEGDHLGVLPVN | 721 |
| EJR07451.1 | ATILENRELQSSS-----SDRSTRHIEVSLP-----EGATYQEGDHLGVLPIN | 718 |
| EJR16542.1 | ASILENRELQSSS-----SERSTRHIEISLP-----EGATYKEGDHLGVLPIN | 721 |
| BAL18840.1 | ASILENRELQSSS-----SERSTRHIEISLP-----EGATYKEGDHLGVLPIN | 721 |
| EDX69960.1 | ASILENRELQSSS-----SERSTRHIEISLP-----EGATYKEGDHLGVLPIN | 721 |
| ACM13462.1 | ASILENRELQSSS-----SERSTRHIEISLP-----EGATYKEGDHLGVLPIN | 721 |
| EEK75631.1 | ASILENRELQSSS-----SERSTRHIEISLP-----EGATYQEGDHLGVLPIN | 721 |
| EEL25491.1 | ASILENRELQSSS-----SDRSTRHIEVSLP-----EGATYKEGDHLGVLPVN | 662 |
| EEL21990.1 | ASILENRELQSSS-----SDRNTRHIEVSLP-----EGATYQEGDHLGVLPIN | 729 |
| EEL33825.1 | ASILENRELQSSS-----SDRSTRHIEVFLP-----EGATYQEGDHLGVLPIN | 729 |

|                        |                                                       |     |
|------------------------|-------------------------------------------------------|-----|
| EEL44933.1             | ASILENRELQSSS-----SERSTRHIEISLP-----EGATYKEGDHLGVLPIN | 729 |
| EEL50167.1             | ATIVENRELQSTG-----SDRSTRHIEVALP-----QGVTYHEGDHLGVLPHN | 799 |
| EJR22930.1             | ASILENRELQSSS-----SDRSTRHIEVSLP-----EGATYKEGDHLGVLPVN | 721 |
| EJP91231.1             | ATILENRELQSSS-----SDRSTRHIEVSLP-----EGATYQEGDHLGVLPIN | 721 |
| EJR37623.1             | ASILENRELQSSS-----SDRSTRHIEVSLP-----EGATYKEGDHLGVLPVN | 721 |
| EJR50635.1             | ASILENRELQSSS-----SERSTRHIEISLP-----EGATYKEGDHLGVLPIN | 721 |
| EJR64551.1             | ASILENRELQSSS-----SDRSTRHIEISLP-----EGATYQEGDHLGVLPIN | 721 |
| EJR75620.1             | ASILENRELQSSS-----SDRSTRHIEVSLP-----EGATYKEGDHLGVLPVN | 721 |
| EJR82049.1             | ASILENRELQSSS-----SDRSTRHIEVSLP-----EGATYKEGDHLGVLPVN | 721 |
| EJR83659.1             | ASILENRELQSSS-----SDRSTRHIEVSLP-----EGATYKEGDHLGVLPVN | 721 |
| EJR91135.1             | VSFIENCESQSN-----SEQSKRHIEIQLS-----KGVTYKEGDSLGVFPRN  | 718 |
| EJR97241.1             | ASILENRELQSPS-----SDRSTRHIEVSLP-----EGATYKEGDHLGVLPVN | 721 |
| EJS05852.1             | ASILENRELQSSS-----SERSTRHIEISLP-----EGATYQEGDHLGVLPIN | 721 |
| EDX58768.1             | ASILENRELQSSS-----SERSTRHIEISLP-----EGATYKEGDHLGVLPIN | 721 |
| AAU24352.1             | AKISANRELQCEK-----SGRSTRHIEISLP-----EGAAYQEGDHLGVLPQN | 717 |
| ABY44122.1             | ASILENRELQSSS-----SERSTRHIEISLP-----EGATYQEGDHLGVLPIN | 721 |
| EDW23201.1             | AVVLKNEELQSEK-----SERQTRHIELQLP-----EGKKYKEGDHIGIVPKN | 708 |
| ABV62358.1             | AVVLKNEELQSQK-----SERKTRHIELRLP-----EGKKYKEGDHIGIVPKN | 708 |
| EIF12263.1             | ASVAENRELQAPE-----SGRSTRHIEITLP-----KEAAYHEGDHLGVLPVN | 717 |
| EIF14027.1             | AEVITNKELHTES-----SKRSVRHIELRLP-----ETETYQEGDHLGVLPQN | 710 |
| EHL75405.1             | ASILENRELQSSS-----SDRSTRHIEVSLP-----EGATYKEGDHLGVLPVN | 721 |
| EJD67577.1             | ASVAENRELQAPE-----SGRSTRHIEITLP-----KEAAYHEGDHLGVLPVN | 717 |
| EJD68347.1             | AEVITNKELHTES-----SKRSVRHIELRLP-----ETETYQEGDHLGVLPQN | 710 |
| EFV73436.1             | AKISANRELQCEK-----SGRSTRHIEISLP-----EGAAYQEGDHLGVLPQN | 731 |
| CBY93692.1             | ASILENRELQSSS-----SERSTRHIEISLP-----EGATYKEGDHLGVLPIN | 721 |
| AFI27355.1             | ASIAENRELQSAD-----SDRSTRHIEIALP-----PDVEYQEGDHLGVLPKN | 718 |
| AFI29229.1             | GIVLENRELQSAD-----STRSTRHIELEIP-----EGKTYKEGDHIGILPKN | 710 |
| EIL85422.1             | AVVLKNQELQSEK-----STRQTRHIELQLP-----EGKHYKEGDHIGIVPKN | 708 |
| ADV93500.1             | GIVLENRELQAD-----STRSTRHIELEIP-----AGKTYKEGDHIGIMPKN  | 710 |
| ADV95715.1             | ASIAENRELQSAD-----SDRSTRHIEIALP-----PDVEYQEGDHLGVLPKN | 718 |
| BAI84248.1             | ASIAENRELQSAD-----SDRSTRHIEIALP-----PDVEYQEGDHLGVLPKN | 718 |
| EFG90288.1             | GNVLENRELQAD-----SPRSTRHIELQIP-----DAKTYKEGDHIGILPKN  | 710 |
| EFG91781.1             | ASIAENRELQSAD-----SDRSTRHIEIALP-----PDVEYREGDHLGVLPKN | 718 |
| AEP85668.1             | ASISENRELQSAD-----SDRSTRHIEITLP-----PDVEYREGDHLGVLPKN | 718 |
| AEP87558.1             | GNVLENRELQAD-----SPRSTRHIELQIP-----DAKTYKEGDHIGILPKN  | 710 |
| sp 008336.1 CYPB_BACSU | GIVLENRELQATA-----STRSTRHIELEIP-----AGKTYKEGDHIGILPKN | 710 |
| sp 008394.1 CYPD_BACSU | ASIAENRELQSAD-----SDRSTRHIEIALP-----PDVEYQEGDHLGVLPKN | 718 |
| AEP89812.1             | ASIVENRELQSAD-----SDRSTRHIEIALP-----PDVEYQEGDHLGILPKN | 718 |

|            |                                                            |     |
|------------|------------------------------------------------------------|-----|
| AEP91702.1 | GIVLENRELQTAD-----STRSTRHIELEIP-----DGKTYKEGDHIGILPKN      | 710 |
| EHA31094.1 | GVVLENRELQTAD-----STRSTRHIELEIP-----AGKTYKEGDHIGIMPKN      | 712 |
| ADH07708.1 | ASILENRELQSSS-----SDRSTRHIEVSLP-----EGATYKEGDHLGVLPVN      | 721 |
| EEM28177.1 | ASILENRELQSPS-----SDRSTRHIEVSLP-----EGATYKEGDHLGVLPVN      | 721 |
| AFQ14162.1 | ATILENRELQSSS-----SDRSTRHIEVSLP-----EGATYQEGDHLGVLPIN      | 721 |
| EEM95517.1 | ASVLENRELQSSS-----SERSTRHIEVSLP-----EGATYQEGDHLGVLPIN      | 721 |
| EEN02344.1 | ATILENRELQSSS-----SDRSTRHIEVSLP-----EGATYQEGDHLGVLPIN      | 721 |
| AFU13781.1 | ASILENRELQSSS-----SDRSTRHIEVSLP-----EGATYQEGDHLGVLPIN      | 729 |
| EEM70897.1 | ASILENRELQSSS-----SERSTRHIEISLP-----EGATYKEGDHLGVLPIN      | 729 |
| ADY22413.1 | ASILENRELQSSS-----SERSTRHIEISLP-----EGATYKEGDHLGVLPIN      | 721 |
| EEM82895.1 | ASILENRELQSSS-----SDRSTRHIEVSLP-----EGATYKEGDHLGVLPVN      | 721 |
| EEM52818.1 | ASILENRELQSSS-----SDRSTRHIEVSLP-----EGATYKEGDHLGVLPVN      | 721 |
| EEM59126.1 | ASILENRELQSSS-----SERSTRHIEISLP-----EGATYKEGDHLGVLPIN      | 729 |
| EEM47193.1 | ASILENRELQSSS-----SDRSTRHIEVSLP-----EGATYKEGDHLGVLPVN      | 662 |
| EEM76899.1 | ASILENRELQSSS-----SERSTRHIEISLP-----EGATYKEGDHLGVLPIN      | 729 |
| EEM88909.1 | ASILENRELQSSS-----SERSTRHIEISLP-----EGATYKEGDHLGVLPIN      | 729 |
| EEM38196.1 | ATILENRELQSSS-----SDRSTRHIEVSLP-----EGATYQEGDHLGVLPIN      | 721 |
| EEM21858.1 | ASILENRELQSSS-----SERSTRHIEISLP-----EGATYKEGDHLGVLPIN      | 724 |
| ABK86139.1 | ASILENRELQSSS-----SERSTRHIEISLP-----EGATYKEGDHLGVLPIN      | 729 |
| EJQ37805.1 | ASILENRELQSSS-----SDRNTRHIEVSLP-----EGATYQEGDHLGVLPIN      | 721 |
| CCF04242.1 | ASVAENRELQAPE-----SGRSTRHIEITLP-----KEAAYHEGDHLGVLPVN      | 717 |
| CCF05972.1 | AEVITNKELHTES-----SKRSVRHIELRLP-----KTETYREGDHLGVLPQN      | 710 |
| ABS73124.1 | ASVAENRELQAPE-----SGRSTRHIEITLP-----KEAAYHEGDHLGVLPVN      | 717 |
| ABS74786.1 | AEVITNKELHTES-----SKRSVRHIELRLP-----ETETYQEGDHLGVLPQN      | 710 |
| EKE46398.1 | ASVAENRELQAPE-----SGRSTRHIEITLP-----KEAAYHEGDHLGVLPVN      | 717 |
| EKE48022.1 | AEVITNKELHTES-----SKRSVRHIELRLP-----KTETYREGDHLGVLPQN      | 710 |
| CCG48683.1 | ASVAENRELQAPE-----SGRSTRHIEITLP-----KEAAYHEGDHLGVLPVN      | 717 |
| AFJ60789.1 | ASVAENRELQAPE-----SGRSTRHIEITLP-----KEAAYHEGDHLGVLPVN      | 724 |
| AFJ62808.1 | AEVITNKELHTES-----SKRSVRHIELRLP-----ETETYQEGDHLGVLPQN      | 710 |
| EEK66903.1 | ASILENRELQSSS-----SERSTRHIEISLP-----EGATYKEGDHLGVLPIN      | 735 |
| EJQ52935.1 | ASILENRELQSSS-----SERSTRHIEISLP-----EGATYQEGDHLGVLPIN      | 721 |
| EJS69574.1 | ASILENRELQSSS-----SERSTRHIEISLP-----EGATYQEGDHLGVLPIN      | 721 |
| EJV63294.1 | ASILENRELQSSS-----SERSTRHIEISLP-----EGATYQEGDHLGVLPIN      | 721 |
| EKF35778.1 | AVVLKNRELQSEQ-----SARQTRHIELQLP-----EGKPYKEGDHIGIVPKN      | 708 |
| EGP08506.1 | MRVLANDELQNVSGA-----NPSTRSTRHIEVELP-----DNLTYRVGDHLSVIVPRN | 733 |
| BAL78328.1 | MKVLVNDELQNKTS-----NPSTRSTRHIEVQLP-----ANISYRVGDHLSVVPRN   | 729 |
| BAC48147.1 | MKVLVNDELQNKSGS-----NPSTRSTRHIEVQLP-----SNITYRVGDHLSVVPRN  | 730 |
| BAL12135.1 | MKVLVNDELQNKFGA-----NPSTRSTRHIEVQLP-----SNITYRVGDHLSVVPRN  | 730 |

|            |                                                             |     |
|------------|-------------------------------------------------------------|-----|
| CCE00185.1 | MTILVNRELQNKSGA-----HPSERSTRHIEVQLP-----AGASYRVGDHLSVVPRN   | 733 |
| EIG57609.1 | MKVLGNDELQNKAGS-----NPSESTRHIEVQLP-----SNINYRVGDHLSVVPRN    | 729 |
| EHR02046.1 | MKVLVNDELQNKAGS-----NPSESTRHIEVQLP-----SNINYRVGDHLSVVPRN    | 729 |
| EJN11211.1 | -----                                                       | 670 |
| CCF15606.1 | SYVTENRELQGET-----SERSTRHIEIAIP-----AGVHYHEGDHLGVLPKN       | 656 |
| CCF12687.1 | AYIKENRELESAN-----CGRSIRRVEITLP-----DGLSYQEGDQIGVLPKN       | 719 |
| ABB05850.1 | ASIVDNRELVDIS-----VAGSRSKKHIELKLP-----EAMTYRSGDYLA VLPRN    | 722 |
| EHP43606.1 | FTVLANTELVNDPAGLWDFALEAPRTATRD IQLRLP-----GGASYATGDHLAVYPQN | 752 |
| ABF10339.1 | FTVLSNDELVGDP SGLWDFSIEAPRTSTRDIRLQLP-----PGITYRTGDHIAVWPQN | 720 |
| CAJ95800.1 | FTVLANTELVNDP SGLWDFSHEAPRTSTRDIRLRLP-----DGVRYATGDHLAVYPQN | 751 |
| AEI79937.1 | FTVLANTELVNDP SGLWDFSREAPRTSTRDIRLRLP-----AGVRYATGDHLAVYPQN | 751 |
| AFD27790.1 | GRVTANRELVSPD-----HPQGRSKRHLDIELP-----EGMTYRAGDYLA VLDPN    | 719 |
| ABC62112.1 | VEVVANRELKDTS-----KDEGRSTRHLEVRLP-----EGMEYEPGDHLCVVPVN     | 722 |
| EAQ27850.1 | VKMLVANRELKNTD-----IGEGRSTRHIEVELA-----QGETYQPGDHL CVVPEN   | 723 |
| EIT84377.1 | ASVIKNDELQR-G-----HERSTRHLELLLP-----AHVSYHAGDHIGILPSN       | 706 |
| CCG43686.1 | AMVNNENRELQV-S-----SERSTRHLELKLP-----EGVNYQEGDHLGVLPQN      | 711 |
| ABX05160.1 | ASVLENRELVDLS-----SPLGRSKRHIELRLP-----NELQYQAGDYLA IILPQN   | 711 |
| BAJ96920.1 | GEI IENKQLAG-----GPRPKRHIEVALP-----EGITYRAGDYLVVLP MN       | 710 |
| GAB96874.1 | GQIVANRELVDTS-----VPGARSKRHLEIALP-----AGQTYETGDYLA VLPLN    | 769 |
| EFH80345.1 | MRVVANRELNSK-----EAERSTRHVELALP-----TGSAYRAGDHLGVVARN       | 727 |
| EFH88481.1 | MTILENRELVQHQP D-----ALNGDSTRHLQVSLP-----PNMPYRTGDHLGVLASN  | 732 |
| EAW32450.1 | MTVTVNDEMVDTR-----VDYGLSKRHISVNL P-----EGVNYKTGDHLLVM PRN   | 719 |
| EIZ82104.1 | ARILENRELVDTA-----SPLGTSKRHIEIALP-----AGMTYRTGDYLA VLPRN    | 721 |
| AEV70722.1 | MTVVQNDELVSAT-----NALNQAKRHVRVALP-----DDFTYNTGDHLTVLADN     | 713 |
| EFC41452.1 | GKVIENYDLVPED-Y---CDDHGTCRSKRHIEIQLP-----AGAHYESGDYLSVLPVN  | 744 |
| ACV78954.1 | -----SDLADIPDA---GPGADGERVTMHL DVELD-----PAVSYPGDHLLVLPQN   | 753 |
| ACV78964.1 | ARVTENRELTLTDPA-----SPGARSTRHLQV TLP-----EGVEYRAGDHLGVLP RN | 727 |
| ACV81379.1 | TLVTRNVELT--ATG-----AAGVRSTRHVEVALP-----AGLSYRAGDHLGVLP RN  | 728 |
| EIZ78677.1 | GRIVENRELVDMT-----SPLGRSKRHIEIALP-----LGMRYRTGDYLA VLPRN    | 714 |
| EJW15291.1 | ATILDNHELQ RGG-----NGRSTRHIEIELP-----EGVSYLEGDHLGVFP IN     | 718 |
| EJW16173.1 | AEVVSNCELQQEG-----SGRSTRHIEIALP-----NGVTYEEGDHLGVLP RN      | 718 |
| EHQ58913.1 | AKVVINRELQKAG-----GGRSTRHIEIALP-----EGSVYQEGDHLGVFPQN       | 716 |
| EHQ59900.1 | ANIVENRELQGEG-----SERSTRHLEIALP-----DGVTYREGDHLGVLPVN       | 715 |
| EHB66924.1 | GRIVHSRNLQHED-----SGRITQHIEIISLP-----EGTEYHEGDHLGVLPAN      | 716 |
| AFH60445.1 | TTVAENRELQGEG-----SDRSTRHIEVVLP-----EEVSYREGDHLGVLP LN      | 715 |
| AEI42011.1 | TTVAENRELQGEG-----SDRSTRHIEVVLP-----EEVSYREGDHLGVLP LN      | 715 |
| ADO57681.1 | AVVTVNRELHAAE-----SERSTRHLEIQLP-----TGLSYREGDHLGVLP RN      | 714 |
| EGG32133.1 | GRIVLSRNLQHEG-----SGRITQHIEIISLP-----PETEYLEGDHLGVLPVN      | 718 |

|            |                                                           |     |
|------------|-----------------------------------------------------------|-----|
| EGL17662.1 | AVIAGNTELQREE-----SGRSTRRIEVKLP-----EGVTYRVGDHLGVLPRN     | 717 |
| ACX65034.1 | GRIVFSRNLQHEG-----SGRITQHIEISLP-----PGTEYREGDHLGVLVFN     | 718 |
| ACT11327.1 | GVVVENRELVDMT-----SPFARSKRHIEIRLP-----EGMAYRAGDYLAFLVPRN  | 718 |
| AEA28016.1 | STVRVNRELNLDG-----ADRSTRHVEIALA-----PGTEYQTGDHLGVLPRN     | 730 |
| EFP68091.1 | MTVLANAELVGDASGLWDFAEAPRGPTRHLTVRLP-----DGMTYATGDHLAVYPRN | 733 |
| EGY61507.1 | MTVLANAELVGDASGLWDFAEAPRGPTRHLTVRLP-----DGMTYATGDHLAVYPRN | 733 |
| EIE85788.1 | AVILANKELQKDG-----SPRSTRHIEIDISKLLGVGEQGHLYHAGDHLEVMPEN   | 847 |
| EIE92534.1 | AIIVANSELQKQD-----SPRSTRHIEVDISKLSGVGEQGQLYSAGDHLEVMPEN   | 849 |
| BAE46296.1 | -----                                                     | 510 |
| BAH31604.1 | -----                                                     | 466 |
| EEN84644.1 | -----                                                     | 466 |
| EEN88978.1 | -----                                                     | 550 |
| ABG96413.1 | -----                                                     | 498 |
| BAH52971.1 | -----                                                     | 465 |
| EHI44575.1 | -----                                                     | 500 |
| EID73168.1 | -----                                                     | 465 |
| EHK83749.1 | -----                                                     | 441 |
| EJI96173.1 | -----                                                     | 465 |
| ABI79384.1 | -----                                                     | 497 |
| CAR47816.1 | -----                                                     | 498 |
| AEK26937.1 | -----                                                     | 473 |
| ABE39056.1 | MKVLANRELQDCA-----ASGRSTRHIEIALP-----EGISYRVGDHLSVMPRN    | 727 |
| ABD08340.1 | MRVLENRELQDRA-----ASGRSTRHIEIALP-----QGMSYRVGDHLSVIPRN    | 724 |
| CAM03474.1 | MTVTEVADLTAPD-----YP--RTRKRFVRLALP-----EGTAYRTADHLAVLPVH  | 722 |
| EJF54063.1 | AQLLSKKELVQQD-----SPFASKIELQIEVP-----EEQSYQTGGYIDILPQN    | 729 |
| AFC23737.1 | AQLLSKKELVQQE-----SPFASKIELQIEVP-----EGQSYQTGGYIDILPQN    | 717 |
| ADG98903.1 | -----                                                     | 471 |
| EGI54680.1 | GLVLINRELVDMQ-----RPGARSKRHIEIALP-----KGMTYRAGDYLAFLVPSN  | 710 |
| AEW97204.1 | MTVTETGDLADLT-----HPLGRSKRFVRLALP-----DGATYRTGDHLAVLPAN   | 737 |
| CAJ88567.1 | -----                                                     | 516 |
| BAC68285.1 | LTVVANEELVSDATGLWDFSIEPPRPAKSITIELP-----DGVTYDTGNHLAVFAKN | 726 |
| BAC75137.1 | -----                                                     | 504 |
| EDY51256.1 | LTVVETGELADLD-----HPLGRSKRFLRLDLA-----HGMEYRTADHLLVRPAN   | 727 |
| EFG07822.1 | LTVVETGELADLD-----HPLGRSKRFLRLDLA-----HGMEYRTADHLLVRPAN   | 759 |
| EHN78335.1 | -----                                                     | 525 |
| CAB66201.1 | -----                                                     | 527 |
| EGG48117.1 | -----                                                     | 517 |
| EFL20831.1 | MEVLEAYELVMD-----HPLGRSKRFVRLRLP-----DGVTYRTGDHLAVLPRN    | 733 |

|            |                                                           |     |
|------------|-----------------------------------------------------------|-----|
| EFL28515.1 | MEVTETDLSLSDPS-----YP--RVKRFVRLALP-----EGVAYRTADHLTVLPSN  | 727 |
| AEY93311.1 | -----                                                     | 542 |
| AEY93321.1 | MTVTEARDLTAPG-----HP--RTKRFLRVALP-----EGVTYRTADHLTVLPAN   | 723 |
| EFD71156.1 | -----                                                     | 529 |
| CBG67789.1 | MEVLDARELVDMS-----HGLGRSKRFLRLRLP-----EGVTYRTGDHLAVLPRN   | 729 |
| CBG68112.1 | -----                                                     | 513 |
| EFL10082.1 | -----                                                     | 501 |
| EFF88741.1 | MQVLDARELVDMD-----HELGRSKRFLRLRLP-----EGVTYRTGDHLAVLPGN   | 730 |
| EDY58112.1 | -----                                                     | 506 |
| EFL36674.1 | -----                                                     | 510 |
| EFL36680.1 | MRVTEAHDLTAPG-----YA--RRKRFVRLALP-----EGVTYRTADHLTVLPAN   | 773 |
| EFE65335.1 | -----                                                     | 526 |
| EGX54696.1 | -----                                                     | 491 |
| ACZ89135.1 | ATVVENRELVDVG-----SPLGRSKRHIEFALP-----EGTTYQAGDYLTVPEN    | 711 |
| ABD83817.1 | MTILVSRELQNKSGP-----DASERSTRHIEVQLP-----GGMTYRVGDHLSVVPCN | 730 |
| ADU39615.1 | LRVVENRELQSPGGD-----AGTSRSTRHVELMLP-----EGVNYVPGDHLSSVPRN | 727 |
| EJL72014.1 | LRVIENRELQN-GGN-----GEAGRSTRHVELMLP-----EGLVYRAGDHLSSVPRN | 727 |

sp|P14779.2|CPXB\_PRIM2

|            |                                         |                  |     |
|------------|-----------------------------------------|------------------|-----|
| ADF40088.1 | YEGIVNRVTARFGLDASQQIRLEAEEEE-KL-----    | AHLPLAKTVSVEELLQ | 752 |
| ADE70259.1 | YEGIVNRVTARFGLDASQQIRLEAEEEE-KL-----    | AHLPLAKTVSVEELLQ | 752 |
| AEN88827.1 | YEGIVNRVATRFGLDASQQIRLEAEEEE-KL-----    | AHLPLGKTVSVEELLQ | 752 |
| KFN05180.1 | YEGIVNRVATRFGLDASQQIRLEAEEEE-KL-----    | AHLPLGKTVSVEELLQ | 752 |
| ACZ37122.1 | YEGIVNRVATRFGLDASQQIRLEAEEEE-KL-----    | AHLPLGKTVSVEELLQ | 752 |
| ADA57055.1 | YEGIVNRVTARFGLDASQQIRLEAEEEE-KL-----    | AHLPLGKTVSVEELLQ | 752 |
| ADA57058.1 | YEGIVNRVATRFGLDASQQIRLEAEEEE-KL-----    | AHLPLGKTVSVEELLQ | 752 |
| ADA57059.1 | YEGIVNRVTARFGLDASQQIRLEAEEEE-KL-----    | AHLPLGKTVSVEELLQ | 752 |
| ADA57061.1 | YEGIVNRVATRFGLDASQQIRLEAEEEE-KL-----    | AHLPLGKTVSVEELLQ | 752 |
| ADA57062.1 | YEGIVNRVTARFGLDASQQIRLEAEEEE-KL-----    | AHLPLGKTVSVEELLQ | 752 |
| ADA57068.1 | YEGIVNRVATRFGLDASQQIRLEAEEEE-KL-----    | AHLPLGKTVSVEELLQ | 752 |
| AAT62301.1 | NEKNVNRILKRFGLNGKDQVILSASGR-SV-----     | NHIPLDSPVRLYDLLS | 766 |
| AAM54108.1 | HPDLVRRAVARLGTTRAERVVTVESSAP--T-----    | GLVPVGRALRVDELLT | 747 |
| EFQ83738.1 | -----                                   | -----            | 505 |
| EFL88452.1 | SPDLVRRVELRFGLQASASLVRNLNSANE---GH----- | SALPTGRPIELRTLLE | 769 |
| BAF89518.1 | PPALVAAAAARCGLAPETQVLLTALHPDAASE-----   | AGLPFGVPVSVGELLA | 872 |
| CBI43648.1 | SGELISRVIRRFGLDPNQHFKIKG--R-QL-----     | PHLPMDRPVNAPELLA | 753 |
| AEB22839.1 | SKEQVSRVLRRLRYNLNGNDQVLLTASGQ-SA-----   | AHLPLDRPVRLHDLLS | 763 |
| EDT22025.1 | SEKNVNRILKRFGLNGKDQVILSASGR-SV-----     | NHIPLDSPVRLYDLLS | 766 |
| AFH84458.1 | SEKNVNRILKRFGLNGKDQVILSASGR-SV-----     | NHIPLDSPVRLYDLLS | 774 |
| ADP31197.1 | SQEKVNRILRRFGLKGNQVTLTASGR-SA-----      | AHLPLDRPVSLHDLLS | 763 |
| ACP19384.1 | SEKNINRILKRFGLNGKDQVILSASGR-SI-----     | NHIPLDSPVSLLDLLS | 766 |
| ADL27534.1 | CEKNINRILRRFGLNGKDQVILSASGR-SI-----     | NHIPLDSPVSLLDLLS | 766 |
| ACO29732.1 | SEKNVNRILKRFGLNGKDQVILSASGR-SV-----     | NHIPLDSPVRLYDLLS | 766 |
| EDX65100.1 | SEKNVNRILKRFGLNGKDQVILSASGR-SV-----     | NHIPLDSPVRLYDLLS | 766 |
| EEK61456.1 | SEKNINRILKRFGLNGKDQVILSASGR-SI-----     | NHIPLDSPVSLLDLLS | 766 |
| EEL16232.1 | SEKNVNRILKRFGLNGKDQVILSASGR-SV-----     | NHIPLDSPVRLYDLLS | 774 |
| EDZ53094.1 | SEKNINRILKRFGLNGKDQVILSASGR-SI-----     | NHIPLDSPVSLLDLLS | 766 |
| EEL81346.1 | -----                                   | -----            | 663 |
| EEL87105.1 | SEKNVNRILKRFGLNGKDQVILSASGR-SV-----     | NHIPLDSPVSLFDLLS | 780 |
| EEL75761.1 | SEKNINRILKRFGLNGKDQVILSASGR-SI-----     | NHIPLDSPVSLLDLLS | 707 |
| ACK88541.1 | SEKNVNRILKRFGLNGKDQVILSASGR-SV-----     | NHIPLDSPVRLYDLLS | 766 |
| EJQ05303.1 | SEKNVNRILKRFGLNGKDQVILSASGR-SV-----     | NHIPLDSPVRLYDLLS | 766 |
| EEK50040.1 | SEKNINRILKRFGLNGKDQVILSASGR-SI-----     | NHIPLDSPVSLLDLLS | 766 |
| AAS42149.1 | SEKNVNRILKRFGLNGKDQVILSASGR-SV-----     | NHIPLDSPVRLYDLLS | 766 |
| AAP10153.1 | SEKNINRILKRFGLNGKDQVILSASGR-SI-----     | NHIPLDSPVSLLDLLS | 766 |
| EEK83466.1 | SEKNVNRILKRFGLNGKDQVILSASGR-SV-----     | NHIPLDSPVRLYDLLS | 774 |

|            |                                                       |     |
|------------|-------------------------------------------------------|-----|
| ACK63698.1 | SEKNINRILKRFGLNGKDQVILSASGR-SI-----NHIPLDSPVSLLDLDS   | 707 |
| EJS57156.1 | SEKNINRILKRFGLNGKDQVILSASGR-SI-----NHIPLDSPVSLLDLDS   | 766 |
| EJS56605.1 | SEKNVNRILKRFGLNGKDQVILSASGR-SV-----NHIPLDSPVSLFDLDS   | 766 |
| EJS68951.1 | SEENVSRVLRRLRYNLNGNDKIVLTASGR-NA-----AHLPLDMPVSLRDLLS | 765 |
| EJQ10567.1 | SEKNINRILKRFGLNGKDQVILSASGR-SI-----NHIPLDSPVSLLDLDS   | 766 |
| EJQ13433.1 | SEKNVNRILKRFGLNGKDQVILSASGR-SV-----NHIPLDSPVSLLDLDS   | 766 |
| EJQ20399.1 | SEKNINRILRRFGLNGKDQVILSASGR-SI-----NHIPLDSPVSLLDLDS   | 766 |
| EJQ30236.1 | SEKNINRILRRFGLNGKDQVILSASGR-SI-----NHIPLDSPVSLLDLDS   | 766 |
| EJQ51278.1 | SEENVSRVLRRLRYNLNGNDKIVLTASGR-NA-----AHLPLDMPVSLRDLLS | 765 |
| EEL10858.1 | SEKNINRILKRFGLNGKDQVILSASGR-SI-----NHIPLDSPVSLLDLDS   | 766 |
| EEL05393.1 | SEKNVNRILKRFGLNGKDQVILSASGR-SV-----NHIPLDSPVSLFDLDS   | 780 |
| EEK94080.1 | SEKNINRILKRFGLNGKDQVILSASGR-SI-----NHIPLDSPVSLLDLDS   | 769 |
| EEK99882.1 | SEKNVNRILKRFGLNGKDQVILSASGR-SV-----NHIPLDSPVRLYDLDS   | 769 |
| EEK55784.1 | SEKNVNRILKRFGLNGKDQVILSASGR-SV-----NHIPLDSPVRLYDLDS   | 774 |
| ADK05784.1 | SEKNVNRILKRFGLNGKDQVILSASGR-SV-----NHIPLDSPVRLYDLDS   | 766 |
| AAU17340.1 | SEKNVNRILKRFGLNGKDQVILSASGR-SV-----NHIPLDSPVRLYDLDS   | 766 |
| EEL64394.1 | SEKNINRILKRFGLNGKDQVILSASGR-SI-----NHIPLDSPVSLLDLDS   | 766 |
| AEW56259.1 | SEKNVNRILKRFGLNGKDQVILSASGR-SV-----NHIPLDSPVRLYDLDS   | 766 |
| AFQ11690.1 | SEKNVNRILKRFGLNGKDQVILSASGR-SV-----NHIPLDSPVRLYDLDS   | 766 |
| EAL16831.1 | SEKNVNRILKRFGLNGKDQVILSASGR-SV-----NHIPLDSPVRLYDLDS   | 766 |
| ACK94296.1 | SEKNVNRILKRFGLNGKDQVILSASGR-SI-----NHIPLDSPVSLLDLDS   | 766 |
| EDZ58760.1 | SEKNVNRILKRFGLNGKDQVILSASGR-SV-----NHIPLDSPVRLYDLDS   | 766 |
| EJV84218.1 | SEKNVNRILKRFGLNGKDQVILSASGR-SV-----NHIPLDSPVSLFDLDS   | 766 |
| EJQ69212.1 | SEKNVNRILKRFGLNGKDQVILSASGR-SV-----NHIPLDSPVSLFDLDS   | 766 |
| EJQ80339.1 | SQKNVNRVLKRFGLNGKDQVILSASGR-SV-----NHIPLDSPISLFDLDS   | 766 |
| EJV81602.1 | SEKNINRILKRFGLNGKDQVILSASGR-SI-----NHIPLDSPVSLLDLDS   | 766 |
| EJQ95474.1 | SEKNVNRILKRFGLNGKDQVILSASGR-SV-----NHIPLDSPVRLYDLDS   | 766 |
| EEK44229.1 | SEKNVNRILKRFGLNGKDQVILSASGR-SV-----NHIPLDSPVRLFDLDS   | 774 |
| EEK88560.1 | SEKNINRILKRFGLNGKDQVILSASGR-SI-----NHIPLDSPVSLLDLDS   | 766 |
| EJR07451.1 | SEKNVNRILKRFGLNGKDQVILSASGR-SI-----NHIPLDSPVSLLDLDS   | 763 |
| EJR16542.1 | SEKNVNRILKRFGLNGKDQVILSASGR-SV-----NHIPLDSPVRLYDLDS   | 766 |
| BAL18840.1 | SEKNVNRILRRFGLNGKDQVILSASGR-SV-----NHIPLDSPVRLYDLDS   | 766 |
| EDX69960.1 | SEKNVNRILKRFGLNGKDQVILSASGR-SV-----NHIPLDSPVRLYDLDS   | 766 |
| ACM13462.1 | SEKNVNRILKRFGLNGKDQVILSASGR-SV-----NHIPLDSPVRLYDLDS   | 766 |
| EEK75631.1 | SEKNVNRILKRFGLNGKDQVILSASGR-SV-----NHIPLDSPVSLYDLDS   | 766 |
| EEL25491.1 | SEKNINRILKRFGLNGKDQVILSASGR-SI-----NHIPLDSPVSLLDLDS   | 707 |
| EEL21990.1 | SEKNVNRILKRFGLNGKDQVILSASGR-SV-----NHIPLDSPVSLFDLIS   | 774 |
| EEL33825.1 | SEKNVNRILKRFGLNGKDQVILSASGR-SV-----NHIPLDSPVSLFDLIS   | 774 |

|                        |                                                        |     |
|------------------------|--------------------------------------------------------|-----|
| EEL44933.1             | SEKNVNRILKRFGLNGKDQVILSASGR-SV-----NHIPLDSPVRLYDILLS   | 774 |
| EEL50167.1             | SEENVSRVLRRLNGLNGNDQVLTASGR-NA-----AHLPLDMPASLRDILLS   | 844 |
| EJR22930.1             | SEKNINRILRRFGLNGKDQVILSASGR-SI-----NHIPLDSPVSLLDILLS   | 766 |
| EJP91231.1             | SEKNVNRILKRFGLNGKDQVILSASGR-SI-----NHIPLDSPVSLLDILLS   | 766 |
| EJR37623.1             | SEKNINRILKRFGLNGKDQVILSASGR-SI-----NHIPLDSPVSLLDILLS   | 766 |
| EJR50635.1             | SEKNVNRILKRFGLNGKDQVILSASGR-SV-----NHIPLDSPVRLYDILLS   | 766 |
| EJR64551.1             | SEKNVNRILKRFGLNGKDQVILSASGR-SV-----NHLPLDSPVSLFDLIS    | 766 |
| EJR75620.1             | SEKNINRILKRFGLNGKDQVILSASGR-SI-----NHIPLDSPVSLLDILLS   | 766 |
| EJR82049.1             | SEKNINRILKRFGLNGKDQVILSASGR-SI-----NHIPLDSPVSLLDILLS   | 766 |
| EJR83659.1             | SEKNINRILKRFGLNGKDQVILSASGR-SI-----NHIPLDSPVSLLDILLS   | 766 |
| EJR91135.1             | SKENVDRILKRFGLNGKDQVILTTS GG-PA-----FHLPLERPVS LFDILLS | 763 |
| EJR97241.1             | SEKNINRILKRFGLNGKDQVILSASGR-SI-----NHIPLDSPVSLLDILLS   | 766 |
| EJS05852.1             | SEKNVNRILKRFGLNGKDQVILSASGR-SV-----NHIPLDSPVSLFDILLS   | 766 |
| EDX58768.1             | SEKNVNRILKRFGLNGKDQVILSASGR-SV-----NHIPLDSPVRLYDILLS   | 766 |
| AAU24352.1             | SEVLIGRVFQRFGLNGNEQILISGR-N-QA-----SHLPLERP VHVKDLFQ   | 761 |
| ABY44122.1             | SEKNVNRILKRFGLNGKDQVILSASGR-SV-----NHIPLDSPVSLFDILLS   | 766 |
| EDW23201.1             | SDALVQRVINRFNLDPKQH IKLYSE-K-KA-----NHLPLDQPIQMRELLA   | 752 |
| ABV62358.1             | RDVLVQRVIDRFNLDPKQH IKLSSE-K-EA-----NHLPLGQPIQIRELLA   | 752 |
| EIF12263.1             | SKEQVSRVLRRLNGLNGNDQVLLTASGQ-SA-----AHLPLDRPVRLHDILLS  | 762 |
| EIF14027.1             | SGELISRVIRRFGLDPNQHF KIKG--R-QL-----PHLPMDR PVNAPELLA  | 753 |
| EHL75405.1             | SEKNINRILKRFGLNGKDQVILSASGR-SI-----NHIPLDSPVSLLDILLS   | 766 |
| EJD67577.1             | SKEQVSRVLRRLNGLNGNDQVLLTASGQ-SA-----AHLPLDRPVRLHDILLS  | 762 |
| EJD68347.1             | SGELISRVIRRFGLDPNQHF KIKG--R-QL-----PHLPMDR PVNAPELLA  | 753 |
| EFV73436.1             | SEVLIGRVFQRFGLNGNEQILISGR-N-QA-----SHLPLERP VHVKDLFQ   | 775 |
| CBY93692.1             | SEKNVNRILKRFGLNGKDQVILSASGR-SV-----NHIPLDSPVRLFDILLS   | 766 |
| AFI27355.1             | SPTNVSRILHRFGLKGT DQVTL LASGR-SA-----GHLPLGRPVSLNDILLS | 763 |
| AFI29229.1             | SREL VQRVLSRFGLQSNHVIQISGS-A-HM-----AHLPMDRPIKVADILLS  | 754 |
| EIL85422.1             | SATLVQRVTD RFKLDPEQH MILSSE-K-EA-----SHLPLNQPIQV GELLA | 752 |
| ADV93500.1             | SREL VQRVLSRFGLQSNHVIKVSGS-A-HM-----SHLPMDRPIKVADILLS  | 754 |
| ADV95715.1             | SQTNVSRILHRFGLKGT DQVTL SASGR-SA-----GHLPLGRPVSLHDILLS | 763 |
| BAI84248.1             | SQTNVSRILHRFGLKGT DQVTL SASGR-SA-----GHLPLGRPVSLYDILLS | 763 |
| EFG90288.1             | SQKLVQRVLSRFDLQSNHVIKITGG-P-HM-----AHLPMDRPIKVTDILLA   | 754 |
| EFG91781.1             | SQTNVSRILHRFGLKGT DQVTL SASGR-SA-----GHLPLGRPVSLHDILLS | 763 |
| AEP85668.1             | SQTNVSRILHRFGLKGT DQVTL SASGR-SA-----GHLPLGRPVSLHDILLS | 763 |
| AEP87558.1             | SQKLVQRVLSRFDLQSNHVMKMSGG-P-HM-----AHLMDRPIKVM DILLA   | 754 |
| sp O08336.1 CYPB_BACSU | SREL VQRVLSRFGLQSNHVIKVSGS-A-HM-----AHLPMDRPIKVVDILLS  | 754 |
| sp O08394.1 CYPD_BACSU | SQTNVSRILHRFGLKGT DQVTL SASGR-SA-----GHLPLGRPVSLHDILLS | 763 |
| AEP89812.1             | SQTNVSRILHRFGLKGT DQVTL SASGR-SA-----GHLPLGRPVSLHDILLS | 763 |

|            |                                       |                   |     |
|------------|---------------------------------------|-------------------|-----|
| AEP91702.1 | SRELVQRVLSRFGLQSNHVIKVS GS-A-HM-----  | AHLPMDRPIRVVDLLS  | 754 |
| EHA31094.1 | SRELVQRVLSRFGLQSNHVIKVS GS-A-HM-----  | SHLPMDRPIKVADLLS  | 756 |
| ADH07708.1 | SEKNINRILKRFGLNGKDQVILSASGR-SI-----   | NHIPLDSPVSLLDLLS  | 766 |
| EEM28177.1 | SEKNINRILKRFGLNGKDQVILSASGR-SI-----   | NHIPLDSPVSLLDLLS  | 766 |
| AFQ14162.1 | SEKNVNRILKRFGLNGKDQVILSASGR-SI-----   | NHIPLDSPVSLLDLLS  | 766 |
| EEM95517.1 | SEKNVNRILKRFGLNGKDQVILSASGR-SI-----   | NHIPLDSPVSLFDLLS  | 766 |
| EEN02344.1 | SEKNVNRILKRFGLNGKDQVILSASGR-SI-----   | NHIPLDSPVSLLDLLS  | 766 |
| AFU13781.1 | SEKNVNRILKRFGLNGKDQVILSASGR-SV-----   | NHIPLDSPVSLFDLIS  | 774 |
| EEM70897.1 | SEKNVNRILKRFGLNGKDQVILSASGR-SV-----   | NHIPLDSPVRLYDLLS  | 774 |
| ADY22413.1 | SEKNVNRILKRFGLNGKDQVILSASGR-SV-----   | NHIPLDSPVRLFDLLS  | 766 |
| EEM82895.1 | SEKNINRILRRFGLNGKDQVILSASGR-SI-----   | NHIPLDSPVSLLDLLS  | 766 |
| EEM52818.1 | SEKNINRILRRFGLNGKDQVILSASGR-SI-----   | NHIPLDSPVSLLDLLS  | 766 |
| EEM59126.1 | SEKNVNRILKRFGLNGKDQVILSASGR-SV-----   | NHIPLDSPVRLYDLLS  | 774 |
| EEM47193.1 | SEKNINRILKRFGLNGKDQVILSASGR-SI-----   | NHIPLDSPVSLLDLLS  | 707 |
| EEM76899.1 | SEKNVNRILKRFGLNGKDQVILSASGR-SV-----   | NHIPLDSPVRLYDLLS  | 774 |
| EEM88909.1 | SEKNVNRILKRFGLNGKDQVILSASGR-SV-----   | NHIPLDSPVRLYDLLS  | 774 |
| EEM38196.1 | SEKNVNRILKRFGLNGKDQVILSASGR-SI-----   | NHIPLDSPVSLLDLLS  | 766 |
| EEM21858.1 | SEKNVNRILKRFGLNGKDQVILSASGR-SV-----   | NHIPLDSPVRLYDLLS  | 769 |
| ABK86139.1 | SEKNVNRILKRFGLNGKDQVILSASGR-SV-----   | NHIPLDSPVRLYDLLS  | 774 |
| EJQ37805.1 | SEKNVNRILKRFGLNGKDQVILSASGR-SV-----   | NHIPLDSPVSLFDLIS  | 766 |
| CCF04242.1 | SKKQVSRVLRFRFNLNGNDQVLLTASGQ-SA-----  | AHLPLDRPVRLHDLLS  | 762 |
| CCF05972.1 | SGELISRVIRRFGLDPNQHFKIKG--R-QL-----   | PHLPMDRVPVNAPELLA | 753 |
| ABS73124.1 | SKEQVSRVLRFRFNLNGNDQVLLTASGQ-SA-----  | AHLPLDRPVRLHDLLS  | 762 |
| ABS74786.1 | SGELISRVIRRFGLDPNQHFKIKG--R-QL-----   | PHLPMDRVPVNAPELLA | 753 |
| EKE46398.1 | SKKQVSRVLRFRFNLNGNDQVLLTASGQ-SA-----  | AHLPLDRPVRLHDLLS  | 762 |
| EKE48022.1 | SGELISRVIRRFGLDPNQHFKIKG--R-QL-----   | PHLPMDRVPVNAPELLA | 753 |
| CCG48683.1 | SKEQVSRVLRFRFNLNGNDQVLLTASGQ-SA-----  | AHLPLDRPVRLHDLLS  | 762 |
| AFJ60789.1 | SKEQVSRVLRFRFNLNGNDQVLLTASGQ-SA-----  | AHLPLDRPVRLHDLLS  | 769 |
| AFJ62808.1 | SGELISRVIRRFGLDPNQHFKIKG--R-QL-----   | PHLPMDRVPVNAPELLA | 753 |
| EEK66903.1 | SQKNVNRILKRFGLNGKDQVILSASGR-SV-----   | NHIPLDSPVRLFDLLS  | 780 |
| EJQ52935.1 | SEKNVNRILKRFGLNGKDQVILSASGR-SV-----   | NHIPLDSPVSLFDLLS  | 766 |
| EJS69574.1 | SEKNVNRILKRFGLNGKDQVILSASGR-SV-----   | NHIPLDSPVSLFDLLS  | 766 |
| EJV63294.1 | SEKNVNRILKRFGLNGKDQVILSASGR-SV-----   | NHIPLDSPVSLFDLLS  | 766 |
| EKF35778.1 | SAALVQRVTNRFKLDPQQHIMLSSA-K-EA-----   | SHLPLNQAIQIRELLA  | 752 |
| EGP08506.1 | DPVLVDVARRFGFLPADQVRLHVAAG---RR-----  | AQLPVDNAVSVGRLLT  | 778 |
| BAL78328.1 | DPTLVDSVARRFGFLPADQIRLQVAEG---RR----- | AQLPVGDAVSVGRLLS  | 774 |
| BAC48147.1 | DPTLVDSVARRFGFLPADQIRLQVAEG---RR----- | AQLPVGEAVSVGRLLS  | 775 |
| BAL12135.1 | DPTLVDSVARRFGFLPADQIRLQVAEG---RR----- | AQLPVGDAVSVGRLLS  | 775 |

|            |                                                         |     |
|------------|---------------------------------------------------------|-----|
| CCE00185.1 | DPELVDRVARRFGFSPADQIRLRVAEG---RR-----AQLPVGEAVSVGRLLT   | 778 |
| EIG57609.1 | DPTLVDSVARRFGFLPADQIRLQVAEG---RR-----AQLPVGDAVSVGRLLS   | 774 |
| EHR02046.1 | DPTLVDSVARRFGFLPADQIRLQVAEG---RR-----AQLPVGDAVSVGRLLS   | 774 |
| EJN11211.1 | -----                                                   | 670 |
| CCF15606.1 | CPQLVERIVHRFGLNGNDYLILSGSGR-SA-----AHLPLDRPVSVYDLLS     | 701 |
| CCF12687.1 | RKEHVERILRRFGLNGNDHLILRAEGR-NI-----AHLPLDRPVRLDDLLS     | 764 |
| ABB05850.1 | AKNNVDRVLRFRVSWDTQVVIEGT-S--S-N-----PRLPLGQAIGCGELFS    | 766 |
| EHP43606.1 | HRATVRDLCEERLDLDPDAMVTLSSAHA---GA-----ARGLPLDEALPLRELLT | 798 |
| ABF10339.1 | DAQLVSELCERLDLDPDAQATISAP-H---GM-----GRGLPIDQALPVRQLLT  | 765 |
| CAJ95800.1 | QPGMVAALCERIGIDPDAIVTLSAS-G---GA-----ARGLPLGEALSVRQLLT  | 796 |
| AEI79937.1 | QPGMVAALCERIGIDPDAIVTLSAS-G---GA-----ARGLPLGEALSVRQLLT  | 796 |
| AFD27790.1 | PADLVERVLRFRVAPDDQVAQAG--R--A-L-----GFLPGDLTSLAGDLLT    | 762 |
| ABC62112.1 | DPAVVDRLLKRFGLDRDTFVRIESRSD---MR-----GPFPSGSTFVSNLAE    | 767 |
| EAQ27850.1 | DDAVVERLLRRFNLDADTYVRIESRSE---MR-----GPFPSGSTFVSNLAK    | 768 |
| EIT84377.1 | SVDLIQRVIKRFALAPSAYVKLQASSS-LA-----THLPLGETVAIEDVLR     | 751 |
| CCG43686.1 | GTELVVERVLRFRFQLKGEEYVVLGEDTG-KA-----THLPTSQPISLRELLT   | 756 |
| ABX05160.1 | HPSLIERACKHFGLKPEQTIILHATR--A-----ANLPIDRPISLGELLS      | 755 |
| BAJ96920.1 | SGYIMDRALKQFGLNRESQIIHSD-----KQ-----TYLPTGYSVNITVILA    | 753 |
| GAB96874.1 | PVPVIDRALARFDLAYDTRLQLS---G--A-A-----TSLPVDAPVLAGELEFG  | 811 |
| EFH80345.1 | TPEMVRRVAAHFHFAEDAKIRLRQGDE---RR-----THLPINEPVRVFDLLA   | 772 |
| EFH88481.1 | PEEQVTRIADHFQFDRQTI IQLHANDE---RK-----PAAPVEEPI SVYDLLA | 777 |
| EAW32450.1 | PAVNVERAAVRFGLGIQQLRLSLKHG---SA-----GAIPINS DITVNTLLS   | 764 |
| EIZ82104.1 | PHPDVERALRRFGLAGDTRILIRKGAG--T-A-----TALPAGYPVSAAEILA   | 766 |
| AEV70722.1 | PPELVDAVLEGLGIDGAQRLAVNPRRS---SR-----RLIALDREVSVRELLT   | 758 |
| EFC41452.1 | SMKVVNKALSHFKLTHDDQIVLKRSET--ISS-----SSYPVNEPISAVNLFM   | 790 |
| ACV78954.1 | RQTI IWRAARTLKFDP SLVVELHATTT--V-E-----TGVPLGQPTMMYDLLA | 798 |
| ACV78964.1 | GIDLIRRV MFRFALDAGMYLTIIPNSG---TH-----THLPTDEQTPLLGVLG  | 772 |
| ACV81379.1 | NQAQIRRV MRRFGLDMGYVTITANS---TH-----THLPVDEPSPLLGVLG    | 773 |
| EIZ78677.1 | PQVDVDRVLRFRGLAADTQVVIG-GQP--N-A-----TSLPSGYPVALSQILA   | 758 |
| EJW15291.1 | ADNLVERVISRFDLNGSDHVVLRTTGN-SP-----SHLPLHRPVLINDLLS     | 763 |
| EJW16173.1 | HAAQVGRVLRFRFGLNGSDHLIVNASGR-SA-----AHLPTGQPVSLSDLLS    | 763 |
| EHQ58913.1 | RKELVERVLSRFDLNGSDHVLKTSGL-RV-----AHLPLDRPVKLYELLG      | 761 |
| EHQ59900.1 | AQELVDRVLRFRFGLQGS DHLIISASGR-SA-----AHLPLDRPISVH DLLS  | 760 |
| EHB66924.1 | PATLVQRVLRFRFKLDAGAHLILSAEGR-SG-----AHLPTGVPVRLDDLLS    | 761 |
| AFH60445.1 | PKDLVGRVLQRFGLOGGDHLVLSATGR-SA-----AHLPLGRPVRLSDLLG     | 760 |
| AEI42011.1 | PKDLVGRVLQRFGLOGGDHLVLSATGR-SA-----AHLPLDRPVRLSDLLG     | 760 |
| ADO57681.1 | PALLVNRVMQRFKLQDQNYIVLRGSDR-DA-----AHLPLDRPVSVGDLLT     | 759 |
| EGG32133.1 | PKTLVQRVLRFRFKLNSGSHLMLSAEGR-SG-----AHLPTGIPVRLDDLLS    | 763 |

|            |                                                          |     |
|------------|----------------------------------------------------------|-----|
| EGL17662.1 | SRESVARVLRFFGLQGSDDLILSGSGR-SA-----AHLPLDRPVSLEDLLG      | 762 |
| ACX65034.1 | PKTLVQRVLRFFKLNAGSHLILSAEGR-SG-----AHLPTGIPVRLDDLLS      | 763 |
| ACT11327.1 | SDDQIDRVLRFFGLSPDMMLVINQA-P--D-V-----TGLPIGQPISCAELLG    | 762 |
| AEA28016.1 | NVDLIRRVIARFKLDAGTYVTITPTGG---SW-----THLPLDEPAPLLGLVGLG  | 775 |
| EFP68091.1 | ADDRVDAAITRLALEGDALVTLTAR-H---AH-----VRHLPLNQPVSVRQLLR   | 778 |
| EGY61507.1 | ADDRVDAAITRLALEGDALVTLTAR-H---AH-----VRHLPLNQPVSVRQLLR   | 778 |
| EIE85788.1 | SKVIVEAIALKFGWVLDVFEIDQETLLNV-----SPRSVASNVKGPCTIRNMLT   | 897 |
| EIE92534.1 | SKASVESIALSFGWILDSVFEINQETLSDV-----SPRSLAANIKGPCTIRNMLT  | 899 |
| BAE46296.1 | -----                                                    | 510 |
| BAH31604.1 | -----                                                    | 466 |
| EEN84644.1 | -----                                                    | 466 |
| EEN88978.1 | -----                                                    | 550 |
| ABG96413.1 | -----                                                    | 498 |
| BAH52971.1 | -----                                                    | 465 |
| EHI44575.1 | -----                                                    | 500 |
| EID73168.1 | -----                                                    | 465 |
| EHK83749.1 | -----                                                    | 441 |
| EJI96173.1 | -----                                                    | 465 |
| ABI79384.1 | -----                                                    | 497 |
| CAR47816.1 | -----                                                    | 498 |
| AEK26937.1 | -----                                                    | 473 |
| ABE39056.1 | DPALVAAVAQRLGFAPDDQIKLQVAPG---RR-----AQLPIGEAISVGRLLG    | 772 |
| ABD08340.1 | DPALVAAVAQRFGFAPDDQIRLSAAPG---RR-----AQLPVGEAVSIGGLL     | 769 |
| CAM03474.1 | DAALVERAAGVLGVDLDTVLDIRAK-----RP-----GRLTFDRSLTVRELLS    | 765 |
| EJF54063.1 | SPANIQRVLRHFQMQHDPYIKLESEEQ--SVA-----LKLPLDQHIRLTDLLK    | 775 |
| AFC23737.1 | SPATIQRVLRHFQMQHDPYIKLESEEQ--SVA-----LKLPLDQHIRLTDLLK    | 763 |
| ADG98903.1 | -----                                                    | 471 |
| EGI54680.1 | PPETVRRALARFGLPDAEVIVHGAPG--V-P-----SVLPVDRPVTAETLFG     | 755 |
| AEW97204.1 | DPALVERAARLLGADPDTVLGVRARRP---GR-----GTLPVDRPVTVRELLT    | 782 |
| CAJ88567.1 | -----                                                    | 516 |
| BAC68285.1 | EPVLVNRALARLGVDRDQVLRDQP-G---GG-----RTHLPVGTPTVTTGLLFT   | 771 |
| BAC75137.1 | -----                                                    | 504 |
| EDY51256.1 | PAALVDRTAAVLGLDPERTVVVGAAPG---A-----TGRGPSLPTGEPMTVRTLLT | 775 |
| EFG07822.1 | PAALVDRTAAVLGLDPERTVVVGAAPG---A-----TGRGPSLPTGEPMTVRTLLT | 807 |
| EHN78335.1 | -----                                                    | 525 |
| CAB66201.1 | -----                                                    | 527 |
| EGG48117.1 | -----                                                    | 517 |
| EFL20831.1 | PDDLQVQVADRFGLDLDRTVRLCARRR---S-----RNILPVDRPLPLRRLLT    | 778 |

|            |                                                              |     |
|------------|--------------------------------------------------------------|-----|
| EFL28515.1 | DPELVTRAAKLLHADPGTVLSIVPARP---ARR-----GSLAVDRPVSVRELLT       | 773 |
| AEY93311.1 | -----                                                        | 542 |
| AEY93321.1 | APELVDRVAFAFGLDADAVLDIRPTRS---RPWGSARTGEAERGGALAVDRPVTVRQLLT | 780 |
| EFD71156.1 | -----                                                        | 529 |
| CBG67789.1 | PDHLVRRVTDRFGLDPDRTVRLRARR---G-----RNTLPVDRPLTVRRLLT         | 774 |
| CBG68112.1 | -----                                                        | 513 |
| EFL10082.1 | -----                                                        | 501 |
| EFF88741.1 | PEALVRRVADRFALDLERTVIRIGTRRR---S-----RAALPVDRPLTLRRLLT       | 775 |
| EDY58112.1 | -----                                                        | 506 |
| EFL36674.1 | -----                                                        | 510 |
| EFL36680.1 | DPGLVTRAATALGVLDLDEVLDIRATRP---RR-----DGIADVDRPVTVRQLLT      | 818 |
| EFE65335.1 | -----                                                        | 526 |
| EGX54696.1 | -----                                                        | 491 |
| ACZ89135.1 | HPELVERAARRFGIQTDAAVVLHSSRG--AMA-----ASLPTGQPVSVRELLG        | 757 |
| ABD83817.1 | APALVDRVARRFGFLPADQIRLAVAEG---RR-----AQLPVGEAVSIGQLLT        | 775 |
| ADU39615.1 | SPAQVERAMARFGFDRSAHVRLSAAPG---RK-----TALPVDQVIAVDRLLG        | 772 |
| EJL72014.1 | SPAQVERAMARFGFDRTSHVRLHAAAG---RK-----AALPVEQVIAVDRLLG        | 772 |

```

sp|P14779.2|CPXB_PRIM2      -YVELQDPVTRTQLRAMAAKTV--CPPHKVELEALLE-K-----QAYKEQVLAKRLTMLE 803
ADF40088.1                  -YVELQDPVTRTQLRAMAAKTV--CPPHKVELEALLE-K-----QAYKEQVLAKRLTMLE 803
ADE70259.1                  -YVELQDPVTRTQLRAMAAKTV--CPPHKVELEVLLLE-K-----QAYKEQVLAKRLTMLE 803
AEN88827.1                  -YVELQDPVTRTQLRAMAAKTV--CPPHKVELEALLE-K-----QTYKEQVLAKRLTMLE 803
KFN05180.1                  -YVELQDPVTRTQLRAMAAKTV--CPPHKVELEALLE-K-----QAYKEQVLAKRLTMLE 803
ACZ37122.1                  -YVELQDPVTRTQLRAMAAKTV--CPPHKVELEVLLLE-K-----QAYKEQVLAKRLTMLE 803
ADA57055.1                  -YVELQDPVTRTQLRAMAAKTV--CPPHKVELEALLE-K-----QAYKEQVLAKRLTMLE 803
ADA57058.1                  -YVELQDPVTRTQLRAMAAKTV--CPPHKVELEVLLLE-K-----QAYKEQVLAKRLTMLE 803
ADA57059.1                  -YVELQDPVTRTQLRAMAAKTV--CPPHKVELEALLE-K-----QAYKEQVLAKRLTMLE 803
ADA57061.1                  -YVELQDPVTRTQLRAMAAKTV--CPPHKVELEVLLLE-K-----QAYKEQVLAKRLTMLE 803
ADA57062.1                  -YVELQDPVTRTQLRAMAAKTV--CPPHKVELEALLE-K-----QAYKEQVLAKRLTMLE 803
ADA57068.1                  -YVELQDPVTRTQLRAMAAKTV--CPPHKVELEVLLLE-K-----QAYKEQVLAKRLTMLE 803
AAT62301.1                  YSVEVQEAATRAQIREMVTFTA--CPPHKKELESLE-D-----GVYQEIQILKKRISMLD 818
AAM54108.1                  RCVDLSAPAGAGVVARLAERCP--CPPERAELAATTG-----ATLLE 787
EFQ83738.1                  ----- 505
EFL88452.1                  DLVELQSPASRRDVQLLVKHTR--CPDSKPKLEALAGDD-----FKDKVQGTRTSILD 820
BAF89518.1                  EHVDLAGPVTRRDLRAWAQAAQ--CPPDRARIAGWL-----SDFPSAVAEAKPRMED 922
CBI43648.1                  SYVELQEPATRAQLRELAHATV--CPPHQKELEHLYSDY-----AAYKENVLKKRMTMLD 806
AEB22839.1                  SCVELQEAASRAQIREMAAYTV--CPPHKHELEGLLE-E-----GVYQEIQILTLRVSMMLD 815
EDT22025.1                  YSVEVQEAATRAQIREMVTFTA--CPPHKKELESLE-D-----GVYQEIQILKKRISMLD 818
AFH84458.1                  YSVEVQEAATRAQIREMVTFTA--CPPHKKELESLE-D-----GVYQEIQILKKRISMLD 826
ADP31197.1                  YSVDVQEAATRAQIRELAAFTV--CPPHKRELEGLAE-E-----GVYQEKILQKRISMLD 815
ACP19384.1                  YSVEVQEAATRAQIREMVTFTA--CPPHKKELEALLE-E-----GVYHEQILKKRISMLD 818
ADL27534.1                  YSVEVQEAATRAQIREMVTFTP--CPPHKKELEALLE-K-----GVYHEQILKKRISMLD 818
ACO29732.1                  YSVEVQEAATRAQIREMVTFTV--CPPHKKELESLE-E-----GVYQEIQILKKRISMLD 818
EDX65100.1                  YSVEVQEAATRAQIREMVAFTA--CPPHKKELESLE-D-----GIYHEQILKKRISMLD 818
EEK61456.1                  YSVEVQEAATRAQIREMVTFTA--CPPHKKELEALLE-E-----GVYHEQILKKRISMLD 818
EEL16232.1                  YSVEVQEAATRAQIREMVTFTA--CPPHKKELESLE-D-----GVYQEIQILKKRISMLD 826
EDZ53094.1                  YSVEVQEAATRAQIREMVTFTA--CPPHKKELEALLE-E-----GVYHEQILKKRISMLD 818
EEL81346.1                  ----- 663
EEL87105.1                  YSVEVQEAATRAQIREMVTFTA--CPPHKKELESLE-E-----GVYHEQILKKRMSMLN 832
EEL75761.1                  YSVEVQEAATRAQIREMVTFTA--CPPHKKELEALLE-E-----GVYHEQILKKRISMLD 759
ACK88541.1                  YSVEVQEAATRAQIREMVTFTA--CPPHKKELESLE-D-----GVYQEIQILKKRISMLD 818
EJQ05303.1                  YSVEVQEAATRAQIREMATFTV--CPPHKKELESLE-E-----GVYQEIQILKKRISMLA 818
EEK50040.1                  YSVEVQEAATRAQIREMVTFTA--CPPHKKELEALLE-E-----GVYHEQILKKRISMLD 818
AAS42149.1                  YSVEVQEAATRAQIREMVTFTA--CPPHKKELESLE-D-----GVYHEQILKKRISMLD 818
AAP10153.1                  YSVEVQEAATRAQIREMVTFTA--CPPHKKELEALLE-E-----GVYHEQILKKRISMLD 818
EEK83466.1                  YSVEVQEAATRAQIREMVTFTV--CPPHKKELESLE-E-----GVYQEIQILKKRISMLD 826

```

|            |                                                              |     |
|------------|--------------------------------------------------------------|-----|
| ACK63698.1 | YSVEVQEAATRAQIREMVTFTA--CPPHKKELEALLE-E-----GVYHEQILKKRISMLD | 759 |
| EJS57156.1 | YSVEVQEAATRAQIREMVTFTA--CPPHKKELEALLE-E-----GVYHEQILKRISMLD  | 818 |
| EJS56605.1 | YSVEVQEAATRAQIREMVTFTA--CPPHKKELESLE-E-----GVYHEQILKKRMSMLN  | 818 |
| EJS68951.1 | YSVEVQEAATRAQIRELASFTV--CPPHKRELETLVE-E-----GIYQEILKKRISMLD  | 817 |
| EJQ10567.1 | YSVEVQEAATRAQIREMVTFTA--CPPHKKELEALLE-E-----GVYHEQILKKRISMLD | 818 |
| EJQ13433.1 | YSVEVQEAATRAQIREMVTFTA--CPPHKKELESLE-E-----GVYHEQILKKRMSMLD  | 818 |
| EJQ20399.1 | YSVEVQEAATRAQIREMVTFTA--CPPHKKELEALLE-E-----GVYHEQILKKRISMLD | 818 |
| EJQ30236.1 | YSVEVQEAATRAQIREMVTFTA--CPPHKKELEALLE-E-----GVYHEQILKKRISMLD | 818 |
| EJQ51278.1 | YSVEVQEAATRAQIRELASFTV--CPPHKRELETLVE-E-----GIYQEILKKRISMLD  | 817 |
| EEL10858.1 | YSVEVQEAATRAQIREMVTFTA--CPPHKKELEALLE-E-----GVYHEQILKKRISMLD | 818 |
| EEL05393.1 | YSVEVQEAATRAQIREMVTFTA--CPPHKKELELLE-E-----GVYHEQILKKRMSMLD  | 832 |
| EEK94080.1 | YSVEVQEAATRAQIREMVTFTA--CPPHKKELEALLE-E-----GVYHEQILKKRISMLD | 821 |
| EEK99882.1 | YSVEVQEAATRAQIREMATFTV--CPPHKKELESLE-E-----GVYQEILKKRISMLD   | 821 |
| EEK55784.1 | YSVEVQEAATRAQIREMVTFTV--CPPHKKELESLE-E-----GVYQEILKKRISMLD   | 826 |
| ADK05784.1 | YSVEVQEAATRAQIREMVTFTV--CPPHKKELESLE-E-----GVYQEILKKRISMLD   | 818 |
| AAU17340.1 | YSVEVQEAATRAQIREMVTFTA--CPPHKKELESLE-D-----GVYHEQILKKRISMLD  | 818 |
| EEL64394.1 | YSVEVQEAATRAQIREMVTFTA--CPPHKKELEALLE-E-----GVYHEQILKKRISMLD | 818 |
| AEW56259.1 | YSVEVQEAATRAQIREMVAFTA--CPPHKKELESLE-D-----GIYHEQILKKRISMLD  | 818 |
| AFQ11690.1 | YSVEVQEAATRAQIREMVTFTA--CPPHKKELESLE-D-----GVYHEQILKKRISMLD  | 818 |
| EAL16831.1 | YSVEVQEAATRAQIREMVTFTV--CPPHKKELESLE-E-----GVYQEILKKRISMLD   | 818 |
| ACK94296.1 | YSVEVQEAATRAQIREMVTFTA--CPPHKKELEALLE-E-----GVYHEQILKKRISMLD | 818 |
| EDZ58760.1 | YSVEVQEAATRAQIREMATFTV--CPPHKKELESLE-E-----GVYQEILKKRISMLD   | 818 |
| EJV84218.1 | YSVEVQEAATRAQIREMVTFTS--CPPHKKELESLE-E-----GVYHEQILKKRMSMLD  | 818 |
| EJQ69212.1 | YSVEVQEAATRAQIREMVTFTA--CPPHKKELELLE-E-----GVYHEQILKKRMSMLD  | 818 |
| EJQ80339.1 | YSVEVQEAATRAQIRELVTFTA--CPPHKKELESLE-E-----GVYQEILKKRISMLD   | 818 |
| EJV81602.1 | YSVEVQEAATRAQIREMVTFTA--CPPHKKELEALLE-E-----GVYHEQILKKRISMLD | 818 |
| EJQ95474.1 | YSVEVQEAATRAQIREMVTFTV--CPPHKKELESLE-E-----GVYQEILKKRISMLD   | 818 |
| EEK44229.1 | YSVEVQEAATRAQIREMVTFTV--CPPHKKELESLE-E-----GVYQEILKKRISMLD   | 826 |
| EEK88560.1 | YSVEVQEAATRAQIREMVTFTA--CPPHKKELEALLE-E-----GVYHEQILKKRISMLD | 818 |
| EJR07451.1 | YSVEVQEAATRAQIREMVTFTA--CPPHKKELEALLE-E-----GVYHEQILKKRISMLD | 815 |
| EJR16542.1 | YSVEVQEAATRAQIREMVTFTV--CPPHKKELESLE-E-----GVYQEILKKRISMLD   | 818 |
| BAL18840.1 | YSVEVQEAATRAQIREMATFTV--CPPHKKELESLE-E-----GVYQEILKKRISMLD   | 818 |
| EDX69960.1 | YSVEVQEAATRAQIREMVAFTA--CPPHKKELESLE-D-----GIYHEQILKKRISMLD  | 818 |
| ACM13462.1 | YSVEVQEAATRAQIREMVTFTV--CPPHKKELESLE-E-----GVYQEILKKRISMLD   | 818 |
| EEK75631.1 | YSVEVQEAATRAQIREMVTFTA--CPPHKKELESLE-D-----GIYHEQILKKRISMLN  | 818 |
| EEL25491.1 | YSVEVQEAATRAQIREMVTFTA--CPPHKKELEALLE-E-----GVYHEQILKKRISMLD | 759 |
| EEL21990.1 | YSVEVQEAATRAQIREMVTFTA--CPPHKKELESLE-E-----GVYHERILKKRISMLD  | 826 |
| EEL33825.1 | YSVEVQEAATRAQIREMVTFTA--CPPHKKELESLE-E-----GVYHERILKKRISMLD  | 826 |

|                        |                                                               |     |
|------------------------|---------------------------------------------------------------|-----|
| EEL44933.1             | YSVEVQEAATRAQIREMVTFTA--CPPHKKELESLE-D-----GVYQEQILKKRISMLD   | 826 |
| EEL50167.1             | YSVEMQEAATRAQIRELASFTV--CPPHKRELETLVE-E-----EIYKEQILKKRISMLD  | 896 |
| EJR22930.1             | YSVEVQEAATRAQIREMVTFTA--CPPHKKELEALLE-E-----GVYHEQILKKRISMLD  | 818 |
| EJP91231.1             | YSVEVQEAATRAQIREIVTFTA--CPPHKKELEALLE-E-----GVYHEQILKKRISMLD  | 818 |
| EJR37623.1             | YSVEVQEAATRAQIREMVTFTA--CPPHKKELEALLE-E-----GVYHEQILKKRISMLD  | 818 |
| EJR50635.1             | YSVEVQEAATRAQIREMVTFTV--CPPHKKELESLE-E-----GVYQEQILKKRISMLD   | 818 |
| EJR64551.1             | YSVEVQEAATRAQIREMVTFTA--CPPHKKELESLE-E-----GVYNERILKKHISMLD   | 818 |
| EJR75620.1             | YSVEVQEAATRAQIREMVTFTA--CPPHKKELEALLE-E-----GVYHEQILKKRISMLD  | 818 |
| EJR82049.1             | YSVEVQEAATRAQIREMVTFTA--CPPHKKELEALLE-E-----GVYHEKILKKRISMLD  | 818 |
| EJR83659.1             | YSVEVQEAATRAQIREMVTFTA--CPPHKKELEALLE-E-----GVYHEQILKKRISMLD  | 818 |
| EJR91135.1             | HCIEIQDAATLTQIREVAAFTV--CPPHKCELEVLLE-Q-----KIYEEQILKKRITMLD  | 815 |
| EJR97241.1             | YSVEVQEAATRAQIREMVTFTA--CPPHKKELEALLE-E-----GVYHEQILKKRISMLD  | 818 |
| EJS05852.1             | YSVEVQEAATRAQIREMVTFTA--CPPHKKELELLE-E-----GVYHEQILKKRMSMLD   | 818 |
| EDX58768.1             | YSVEVQEAATRAQIREMVTFTA--CPPHKKELESLE-D-----GVYQEQILKKRISMLD   | 818 |
| AAU24352.1             | HCVELQEPATRAQIRELAAHTV--CPPHQRELEDLLK-D-----DVYKDQVLNKRLTMLD  | 813 |
| ABY44122.1             | YSVEVQEAATRAQIREMVTFTA--CPPHKKELELLE-E-----GVYHEQILKKRMSMLD   | 818 |
| EDW23201.1             | SHVELQEPATRTQLRELAAYTV--CPPHRVELEQMA--G-----EAYQEAILKKRVTMLD  | 803 |
| ABV62358.1             | SHVELQEPATRTQLRELAAYTV--CPPHRVELEQMA--G-----EAYQEAILKKRVTMLD  | 803 |
| EIF12263.1             | SCVELQEAASRAQIREMAAYTA--CPPHKRELEDFLE-E-----GVYQEEILTSRVSMMLD | 814 |
| EIF14027.1             | SYVELQEPATRAQLRELAHTV--CPPHQKELEHLYSDD-----TAYKENVLKKRMTMLD   | 806 |
| EHL75405.1             | YSVEVQEAATRAQIREMVTFTA--CPPHKKELEALLE-E-----GVYHEQILKKRISMLD  | 818 |
| EJD67577.1             | SCVELQEAASRVQIREMAAYTV--CPPHKRELEDFLE-E-----GVYQEQILTSRVSMMLD | 814 |
| EJD68347.1             | SYVELQEPATRAQLRELAHTV--CPPHQKELEHLYSDD-----AAYKENVLKKRMTMLD   | 806 |
| EFV73436.1             | HCVELQEPATRAQIRELAAHTV--CPPHQRELEDLLK-D-----DVYKDQVLNKRLTMLD  | 827 |
| CBY93692.1             | YSVEVQEAATRAQIREMVTFTV--CPPHKKELESLE-E-----GVYQEQILKKRISMLD   | 818 |
| AFI27355.1             | YSVEVQEAATRAQIRELAAFTV--CPPHKRELEELTA-E-----GVYQEQILKKRISMLD  | 815 |
| AFI29229.1             | SYVELQEPASRLQLRELAAYTV--CPPHQKELEQLVSDD-----GTYKEQVLAKRLTMLD  | 807 |
| EIL85422.1             | SHVELQEPVTRTQLRELAKYTV--CPPHRIELEQMA--G-----EIYQEAVLKKRVTMLD  | 803 |
| ADV93500.1             | SYVELQEPASRLQLRELAAYTV--CPPHQKELEQLVLDL-----GIYKEQVLAKRLTMLD  | 807 |
| ADV95715.1             | YSVEVQEAATRAQIRELAAFTV--CPPHRRELEELSA-E-----GVYQEQILKKRISMLD  | 815 |
| BAI84248.1             | YSVEVQEAATRAQIRELAAFTV--CPPHRRELEELSA-E-----GVYQEQILKKRISMLD  | 815 |
| EFG90288.1             | SYVELQDPASRLQLRELAAYTV--CPPHKKELEQLVSDD-----GIYKEQVLAKRLTMLD  | 807 |
| EFG91781.1             | YSVEVQEAATRAQIRELAAFTV--CPPHKRELEDMTE-E-----GVYQEQILKKRISMLD  | 815 |
| AEP85668.1             | YSVEVQEAASRAQIRELAAFTV--CPPHKRELEDLAT-E-----GIYQEQILKKRISMLD  | 815 |
| AEP87558.1             | SYVELQDPASRLQLRELAAYTV--CPPHKKELEQLVSDD-----GIYKEQVLAKRLTMLD  | 807 |
| sp 008336.1 CYPB_BACSU | SYVELQEPASRLQLRELAAYTV--CPPHQKELEQLVSDD-----GIYKEQVLAKRLTMLD  | 807 |
| sp 008394.1 CYPD_BACSU | YSVEVQEAATRAQIRELASFTV--CPPHRRELEELSA-E-----GVYQEQILKKRISMLD  | 815 |
| AEP89812.1             | YSVEVQEAATRAQIRELAAFTV--CPPHRRELEELTA-E-----GVYQEQILKKRISMLD  | 815 |

|            |                                                               |     |
|------------|---------------------------------------------------------------|-----|
| AEP91702.1 | SYVELQEPASRLQLRELASYTV--CPPHQKELEQLVSDD-----GIYKEHVLAKRLTMLD  | 807 |
| EHA31094.1 | SYVELQEPASRLQLRELASYTV--CPPHQKELEQLVLDD-----GIYKEQVLAKRLTMLD  | 809 |
| ADH07708.1 | YSVEVQEAATRAQIREMVTFTA--CPPHKKELEALLE-E-----GVYHEQILKKRISMLD  | 818 |
| EEM28177.1 | YSVEVQEAATRAQIREMVTFTA--CPPHKKELEALLE-E-----GVYHEQILKKRISMLD  | 818 |
| AFQ14162.1 | YSVEVQEAATRAQIREMVTFTA--CPPHKKELEALLE-E-----GVYHEQILKKRISMLD  | 818 |
| EEM95517.1 | YSVEVQEAATRAQIREMVAFTV--CPPHKKELESLLLE-E-----GVYHEQILKKRISMLD | 818 |
| EEN02344.1 | YSVEVQEAATRAQIREMVTFTA--CPPHKKELEALLE-E-----GVYHEQILKKRISMLD  | 818 |
| AFU13781.1 | YSVEVQEAATRAQIREMVTFTA--CPPHKKELESLLLE-E-----GVYHERILKKRISMLD | 826 |
| EEM70897.1 | YSVEVQEAATRAQIREMVTFTA--CPPHKKELESLLLE-E-----GVYHERILKKRISMLD | 826 |
| ADY22413.1 | YSVEVQEAATRAQIREMVTFTA--CPPHKKELESLLLE-E-----GVYHERILKKRISMLD | 826 |
| EEM82895.1 | YSVEVQEAATRAQIREMVTFTA--CPPHKKELESLLLE-E-----GVYHERILKKRISMLD | 826 |
| EEM52818.1 | YSVEVQEAATRAQIREMVTFTA--CPPHKKELESLLLE-E-----GVYHERILKKRISMLD | 826 |
| EEM59126.1 | YSVEVQEAATRAQIREMVTFTA--CPPHKKELESLLLE-E-----GVYHERILKKRISMLD | 826 |
| EEM47193.1 | YSVEVQEAATRAQIREMVTFTA--CPPHKKELESLLLE-E-----GVYHERILKKRISMLD | 826 |
| EEM76899.1 | YSVEVQEAATRAQIREMVTFTA--CPPHKKELESLLLE-E-----GVYHERILKKRISMLD | 826 |
| EEM88909.1 | YSVEVQEAATRAQIREMVTFTA--CPPHKKELESLLLE-E-----GVYHERILKKRISMLD | 826 |
| EEM38196.1 | YSVEVQEAATRAQIREMVTFTA--CPPHKKELESLLLE-E-----GVYHERILKKRISMLD | 826 |
| EEM21858.1 | YSVEVQEAATRAQIREMVTFTA--CPPHKKELESLLLE-E-----GVYHERILKKRISMLD | 826 |
| ABK86139.1 | YSVEVQEAATRAQIREMVAFTA--CPPHKKELESLLLE-E-----GIYHEQILKKRISMLD | 818 |
| EJQ37805.1 | YSVEVQEAATRAQIREMVTFTA--CPPHKKELESLLLE-E-----GVYHERILKKRISMLD | 818 |
| CCF04242.1 | SCVELQEAASRAQIREMAAYTV--CPPHKRELEDFLE-E-----GVYQEQILTSRVSMMLD | 814 |
| CCF05972.1 | SYVELQEPATRAQLRELAHHTV--CPPHQKELEHLYSDD-----AAYKENVLKKRMTMLD  | 806 |
| ABS73124.1 | SCVELQEAASRAQIREMAAYTV--CPPHKRELEDFLE-E-----GVYQEQILTSRVSMMLD | 814 |
| ABS74786.1 | SYVELQEPATRAQLRELAHHTV--CPPHQKELEHLYSDD-----AAYKENVLKNRMTMLD  | 806 |
| EKE46398.1 | SCVELQEAASRAQIREMAAYTV--CPPHKRELEDFLE-E-----GVYQEQILTSRVSMMLD | 814 |
| EKE48022.1 | SYVELQEPATRAQLRELAHHTV--CPPHQKELEHLYSDD-----AAYKENVLKKRMTMLD  | 806 |
| CCG48683.1 | SCVELQEAASRAQIREMAAYTV--CPPHKRELEDFLE-E-----GVYQEKILTLRVSMMLD | 814 |
| AFJ60789.1 | SCVELQEAASRAQIREMAAYTV--CPPHKRELEDFLE-E-----GVYQEKILTLRVSMMLD | 821 |
| AFJ62808.1 | SYVELQEPATRAQLRELAHHTV--CPPHQKELEHLYSDD-----AAYKENVLKKRMTMLD  | 806 |
| EEK66903.1 | YSVEVQEAATRAQIREMVTFTA--CPPHKKELESLLLE-E-----GVYHEQILKKRISMLD | 832 |
| EJQ52935.1 | YSVEVQEAATRAQIREMVTFTA--CPPHKKELESLLLE-E-----GVYHEQILKKRMSMLD | 818 |
| EJS69574.1 | YSVEVQEAATRAQIREMVTFTA--CPPHKKELESLLLE-E-----GVYHEQILKKRMSMLD | 818 |
| EJV63294.1 | YSVEVQEAATRAQMREMVTFTA--CPPHKKELESLLLE-E-----GVYHEQILKKRMSMLD | 818 |
| EKF35778.1 | SHVELQEPATRTQLRELAKYTV--CPPHRIELEQMA--G-----EIYQEAILKKRVTMLD  | 803 |
| EGP08506.1 | EFVELQQIATRQIQIQAENTR--CPRTKPKLEAFVGGD--PASTELYSRSEILGKRRSVYS | 835 |
| BAL78328.1 | EFVELQQVATRQIQIQAENTR--CPVTKPKLLAFVGGEE--PETLERYRTEILARRKSVFD | 831 |
| BAC48147.1 | EFVELQQVATRQIQIQAENTR--CPVTKPKLLAFVGGEE--AEPAERYRTEILAMRKSVYD | 832 |
| BAL12135.1 | EFVELQQVATRQIQIQAENTR--CPVTKPKLLAFVGGEE--AEPLERYRTEILARRKSVFD | 832 |

|            |                                                               |     |
|------------|---------------------------------------------------------------|-----|
| CCE00185.1 | DFVELQQVATRQIQIMSEHTR--CPVTRPKLAAYLGDD-ADSGERYRAEILAKRKSVD    | 835 |
| EIG57609.1 | EFVELQQVATRQIKIMAEHTR--CPVTKPKLLGFVGD-EAPLEHYRGEILARRKSVFD    | 831 |
| EHR02046.1 | EFVELQQVATRQIQIMAEHTR--CPVTQPKLLAFVGE-E-PETLERYRSEILAKRKSVD   | 831 |
| EJN11211.1 | -----                                                         | 670 |
| CCF15606.1 | HSVELQEAAATRAQLRELASYTT--CPPHKRELEALLE-E-----DTYKTNIMNKRISMFN | 753 |
| CCF12687.1 | QNVLDLQATVTHAQLRELAAYTV--CPPHKRELQALLD-E-----IIYEQQVEKNGMSMLE | 816 |
| ABB05850.1 | SYVELAVPATRSQVSSLAAATR--CPPEKVELERLS-A-----DGFECEILGKRRTVMD   | 817 |
| EHP43606.1 | HFIELQDVVSRQTLRLLQYTR--CPVTRAALER-LG-S-DHADDGYAAQVAARRMGLVD   | 853 |
| ABF10339.1 | HFIELQDVVSRQTLRALAQATR--CPFTKQSIEQ-LA-S-DDAEHGYATKVVARRLGILD  | 820 |
| CAJ95800.1 | HFVELQDVVSRHTLRLLSQSSR--CPVTRQALRQ-LA-S-DDAGSGYAAQVAPRRLGLAD  | 851 |
| AEI79937.1 | HFVELQDVVSRQTLRLLSQSSR--CPVTRQALQQ-LA-S-DDAESGYAAQVAPRRLGLAD  | 851 |
| AFD27790.1 | HYTELTQPATRRQVERLRDATR--CPPERQILAALA-----DGYDTEVLAQRLSVLD     | 812 |
| ABC62112.1 | TAGELQAVATRQDIATLARYSE--CPNSRAALEALAAPPADGTDRYTSEVLEKRRSVLD   | 825 |
| EAQ27850.1 | TAGELQAVATRQDIATLALYTE--CPNSKPALEKLAQPPQEDGTDQYATDVLAKRKSVD   | 826 |
| EIT84377.1 | NCVELQDTATPSQIELLAAHTN--CPPHAQQLRALAT-G-----DSYQQDIVKKHISMLD  | 803 |
| CCG43686.1 | SYVELQEPATRSQIRDLAHNP--CPPHKMELEKLE-D-----ETYKNEILAHRLTMLD    | 808 |
| ABX05160.1 | SHVELATPATQRDLELLAQKNV--CPSHQIHLAALAADH-----ERYTTEILQKRLSLLD  | 808 |
| BAJ96920.1 | AYVELSQPATRKQILKMAEYSA----DDKDKLISLA--E-----KSYKEEILEKHTSILD  | 802 |
| GAB96874.1 | SYVELSRPAGRRQIEQLAAACP--CPPEKAQLLALT-DE-----STYSAQVLGKRLSVLD  | 863 |
| EFH80345.1 | DYVELQEVATRTQIKVLAEQTE--CPPEKMRLLALCGDD-EASAARYREEVLAKRKTLD   | 829 |
| EFH88481.1 | NYIELQDVATRTHIELMLEYTN--DDSERARLEMLVGSG-SESEAAYKKEVLEQHKSILD  | 834 |
| EAW32450.1 | RYVELCDPATVRQIKLLAEHAS--CPPDVTALNNLAHSD-----HYKSEVLDKRVSMIL   | 816 |
| EIZ82104.1 | DYVELGQPATRAQVQGLAAATR--CPPDRAALEELA-QP-----EAYAAEVLEKRVSLLD  | 818 |
| AEV70722.1 | HFVELRKPATPSQLRRLAASNA--CEPERQRLEELAEAS-----GPELSPVE          | 804 |
| EFC41452.1 | NYFELSQPATKRQLEILLEHTK--EASDKQVLQQLIEK-----D-----SNIPPILD     | 835 |
| ACV78954.1 | GYCDLRAPATRRGIDILAAHVD--RDPARAALLALTADD-----DAFAGGVLARRVSLLD  | 851 |
| ACV78964.1 | SCVELQATATRADIEVLAEYTD--DPAQRAELQALLGDD-EQSRTRYREQVSGPNLSVLD  | 829 |
| ACV81379.1 | ACVELQATATRADLEVLAEHTD--DPAQQAALRALTDD-----ETYRTQVREPNSVLD    | 825 |
| EIZ78677.1 | DYVELGQPATRAQVAQLTAATR--CLPDRAALEAHG-DE-----ATYARDVLARRVTLDD  | 810 |
| EJW15291.1 | RSVELQEPATRAQIRELAALTV--CPPHRIELEALLE-A-----ESYRQNILEKRVSMIL  | 815 |
| EJW16173.1 | HSVELQEAAATRAQLRELASYTA--CPPHRRELESLLT-E-----DKYVAEVLKRVSMIL  | 815 |
| EHQ58913.1 | RSVELQEAAATRVQIRELAARTA--CPPHKRELEALLE-E-----EAYKSNILQQRISMIL | 813 |
| EHQ59900.1 | HSVELQEAAATRAQLREMAFSTV--CPPHKQELEALLQ-E-----DTYQDQVLSKRVTMID | 812 |
| EHB66924.1 | RSVELQEPATRAQIREMAECTV--CPPHAKELLELLE-D-----PTYQDEVRAKRISMIL  | 813 |
| AFH60445.1 | SSVELQEPATRAQLRELAAYTV--CPPHKRELEALLQ-E-----DAYKTEVLRKRVTMLE  | 812 |
| AEI42011.1 | SSVELQEPATRAQLRELAAYTV--CPPHKRELEALLQ-E-----DAYKTEVLRKRVTMLE  | 812 |
| ADO57681.1 | LSVELQEPATRAQLRQLASFSTV--CPPHKKEIEALLE-D-----TTFDQEIIRKRVTMLD | 811 |
| EGG32133.1 | RSVELQEPATRAQIREMAASTV--CPPHAKELQELIE-E-----ASYQAEVRAKRITMLD  | 815 |

|            |                                                                |     |
|------------|----------------------------------------------------------------|-----|
| EGL17662.1 | HSVDLQEAATRAQLRELACTA--CPPHKRELEALLE-E-----DAYREQVWKKRVSMMLD   | 814 |
| ACX65034.1 | RSVELQEPATMAQIREMAASTV--CPPHAKELQELIE-E-----ASYQAEVRAKRITMLD   | 815 |
| ACT11327.1 | NYVELSQPATRAQVAALAAATR--CPPEKMELEKLA-T-----EHYENDVLAPRLSVLD    | 813 |
| AEA28016.1 | SCVELQDVAGRSDIATLAASAT--DPAEREALQALTTLD-DEGRARYRKTIAEPRVTVLD   | 832 |
| EFP68091.1 | DFVELQDTATVRDITALHAATR--CPFTRGQLAVWLE-G-DEAAERFDRDIQAPHVSVLD   | 834 |
| EGY61507.1 | DFVELQDTATVRDITALHAATR--CPFTRGQLAVWLE-G-DEAAERFDRDIQAPHVSVLD   | 834 |
| EIE85788.1 | YYADVTSPPSRAVLGYFATQLKLTAPETASEFEKLIMPD-SNNQDQYPN-FIKQHRTLLD   | 955 |
| EIE92534.1 | YYADVTSPPSRAVLGCFAAQLKLVAPETASEFEKLIMPD-ANNQDQYPD-FIKQYRTLLD   | 957 |
| BAE46296.1 | -----                                                          | 510 |
| BAH31604.1 | -----                                                          | 466 |
| EEN84644.1 | -----                                                          | 466 |
| EEN88978.1 | -----                                                          | 550 |
| ABG96413.1 | -----                                                          | 498 |
| BAH52971.1 | -----                                                          | 465 |
| EHI44575.1 | -----                                                          | 500 |
| EID73168.1 | -----                                                          | 465 |
| EHK83749.1 | -----                                                          | 441 |
| EJI96173.1 | -----                                                          | 465 |
| ABI79384.1 | -----                                                          | 497 |
| CAR47816.1 | -----                                                          | 498 |
| AEK26937.1 | -----                                                          | 473 |
| ABE39056.1 | DFVELQQVATRQKQIIVMAEHTR--CPQTRPKLQALAGGD-GAADEAYRAGVLAKRKSVDYD | 829 |
| ABD08340.1 | DHVELQQVATRQKQIVALAAHTR--CPQTRPKLQALAGGD-GAADDAYRAEVLGKRRSVFD  | 826 |
| CAM03474.1 | HHVELQDPPTPDGLDALAALNP--CPPERAALRGLAEEA-----RSGTADHRTLWD       | 814 |
| EJF54063.1 | YYVELQRPAGKKLLEEVLQTR--CPFSAQGLQQFI-----DNYESEVLQKNRSLLS       | 825 |
| AFC23737.1 | YYVELQRPAGKKWLEEVLAQTR--CPFSAQGLQQFI-----EQYESEVLQKNRSLLS      | 813 |
| ADG98903.1 | -----                                                          | 471 |
| EGI54680.1 | DYLELQQPATRGQITTLATIIP--CPPERKEAERLA-QE-----DIYAAEILARRVTLDD   | 807 |
| AEW97204.1 | YHLELSDPATAAQIIVLADRNP--CPPEQAELKKLA-----PGRASVLD              | 824 |
| CAJ88567.1 | -----                                                          | 516 |
| BAC68285.1 | EFVELQDVATRSQIQELAEHTQ--CPWTRPQLQAYTADT-AEAEERYQKEILGKRVSVLN   | 828 |
| BAC75137.1 | -----                                                          | 504 |
| EDY51256.1 | HLVELGRPATARQARALAAHAP--CPPERATLERHADGP-----TDGPTAATATVTD      | 825 |
| EFG07822.1 | HLVELGRPATARQARALAAHAP--CPPERATLERHADGP-----TDGPTAATATVTD      | 857 |
| EHN78335.1 | -----                                                          | 525 |
| CAB66201.1 | -----                                                          | 527 |
| EGG48117.1 | -----                                                          | 517 |
| EFL20831.1 | DFVELQDAATQEQVAVLAEHTA--CPPEKRPLAELAAVE-----PEAFREQVTVAGRSVLD  | 832 |

|            |                                                              |     |
|------------|--------------------------------------------------------------|-----|
| EFL28515.1 | HHVELNHRPNAEQLALLAELNP--CPPEKAALAAQA-----PGERTLLD            | 815 |
| AEY93311.1 | -----                                                        | 542 |
| AEY93321.1 | HHVELQERPTSRQAALLAEANP--CPPERAALAALPG-----DDPRTLVE           | 823 |
| EFD71156.1 | -----                                                        | 529 |
| CBG67789.1 | DFVELQDPATREQIAVLAEHTA--CPPEKRPLTELAAAD----PETFREQVTAAGRSVLD | 828 |
| CBG68112.1 | -----                                                        | 513 |
| EFL10082.1 | -----                                                        | 501 |
| EFF88741.1 | DFVELQDPAAQEQVAVLAEHTE--CPPEQRPLAELATAD----PVTFREQVTDAGRSVLD | 829 |
| EDY58112.1 | -----                                                        | 506 |
| EFL36674.1 | -----                                                        | 510 |
| EFL36680.1 | HHVELQERPSTGQLAALAAANP--CPPERMALAAL-S-----DDPRTLVE           | 860 |
| EFE65335.1 | -----                                                        | 526 |
| EGX54696.1 | -----                                                        | 491 |
| ACZ89135.1 | HHVELSAPATRKDLERLARHAQ--CPPDRDRLSALAGDP----VRHRQEILDRRVSVLD  | 810 |
| ABD83817.1 | DFVELQQVATRKQIQIMSEHTR--CPVTKPKLVAYVGDD-ADSSERYRADILSRKSVYD  | 832 |
| ADU39615.1 | DYVELQDVATRKQIATLAAYTE--CPFTKPKLVALSGSD-EASQAAYKAEVLHKRKSLLE | 829 |
| EJL72014.1 | DYVELQDVATRKQIATLAAYTE--CPFTKPRLAALSGSD-EASQAMYKTEVLHKRKSLLD | 829 |

|                        |                                                                 |     |
|------------------------|-----------------------------------------------------------------|-----|
| sp P14779.2 CPXB_PRIM2 | LLEKYPA-CE--MKFSEFIA-LLPSIRPRYYSISSSPRV-DEKQASITVSVVSGEAW-SG    | 857 |
| ADF40088.1             | LLEKYPA-CE--MEFSEFIA-LLPSIRPRYYSISSSPRV-DEKQASITVSVVSGEAW-SG    | 857 |
| ADE70259.1             | LLEKYPA-CE--MEFSEFIA-LLPSMRPRYYSISSSPRV-DEKQASITVSVVSGEAW-SG    | 857 |
| AEN88827.1             | LLEKYPA-CE--MEFSEFIA-LLPSMRPRYYSISSSPRV-DEKQASITVSVVSGEAW-SG    | 857 |
| KFN05180.1             | LLEKYPA-CE--MKFSEFIA-LLPSIRPRYYSISSSPRV-DEKQASITVSVVSGEAW-SG    | 857 |
| ACZ37122.1             | LLEKYPA-CE--MEFSEFIA-LLPSMRPRYYSISSSPRV-DEKQASITVSVVSGEAW-SG    | 857 |
| ADA57055.1             | LLEKYPA-CE--MEFSEFIA-LLPSISPRYYSISSSPHV-DEKQASITVSVVSGEAW-SG    | 857 |
| ADA57058.1             | LLEKYPA-CE--MEFSEFIA-LLPSMRPRYYSISSSPRV-DEKQASITVSVVSGEAW-SG    | 857 |
| ADA57059.1             | LLEKYPA-CE--MEFSEFIA-LLPSISPRYYSISSSPHV-DEKQASITVSVVSGEAW-SG    | 857 |
| ADA57061.1             | LLEKYPA-CE--MEFSEFIA-LLPSMRPRYYSISSSPRV-DEKQASITVSVVSGEAW-SG    | 857 |
| ADA57062.1             | LLEKYPA-CE--MEFSEFIA-LLPSIRPRYYSISSSPRV-DEKQASITVSVVSGEAW-SG    | 857 |
| ADA57068.1             | LLEKYPA-CE--MEFSEFIA-LLPSMRPRYYSISSSPRV-DEKQASITVSVVSGEAW-SG    | 857 |
| AAT62301.1             | LLEKYEA-CE--IRFERFLE-LLPALKPRYYSISSSPLV-AQDRLSITVGVVNAAPAW-SG   | 872 |
| AAM54108.1             | LLERFPS-CA--VDLALALE-LLPAPRTRLYSISSAAEE-QRAEVALTVSV-----        | 833 |
| EFQ83738.1             | -----                                                           | 505 |
| EFL88452.1             | LLEEFPA-CE--LPFAVYLE-TCPNMVPYYSISSSPKA-GSDRCSITVAVVDDVAR-NG     | 874 |
| BAF89518.1             | LLAQVPS-VQ--LDLAALLT-VRPALKPRYYSISSSPLM-SPDACALTGVGHQFTTA-DG    | 976 |
| CBI43648.1             | LLEDYPA-CE--LPFERFLE-LLPSLKARYYSISSSPKA-NKRELSITVGVVTAPAW-SG    | 860 |
| AEB22839.1             | LLEKYEA-CE--LPFERFLE-LLRPLKPRYYSISSSPLK-HPGQASITVGVVVRGPAPAW-SG | 869 |
| EDT22025.1             | LLEKYEA-CE--IRFEPFLE-LLPALKPRYYSISSSPLV-AQDRLSITVGVVNAAPAW-SG   | 872 |
| AFH84458.1             | LLEKYEA-CE--IRFEPFLE-LLPALKPRYYSISSSPLV-AQDRLSITVGVVNAAPAW-SG   | 880 |
| ADP31197.1             | LLEEYEA-CE--MPFERFLE-LLRPLKPRYYSISSSPRV-NPEQAAITVGVVVRSPAW-SG   | 869 |
| ACP19384.1             | LLEKYEA-CE--IRFERFLE-LLPALKPRYYSISSSPLV-AHNRLSITVGVVNAAPAW-SG   | 872 |
| ADL27534.1             | LLEKNEA-CE--IRFERFLE-LLPALKPRYYSISSSPLV-VQNRLSITVGVVNAAPAW-SG   | 872 |
| ACO29732.1             | LLEKYEA-CE--IRFERFLE-LLPALKPRYYSISSSPLV-AQDRLSITVGVVNAAPAW-SG   | 872 |
| EDX65100.1             | LLEKYEA-CE--IRFERFLE-LLPALKPRYYSISSSPLV-AQDRLSITVGVVNAAPAW-SG   | 872 |
| EEK61456.1             | LLEKYEA-CE--IRFERFLE-LLPALKPRYYSISSSPLV-AQNRLSITVGVVNAAPAW-SG   | 872 |
| EEL16232.1             | LLEKYEA-CE--IRFERFLE-LLPALKPRYYSISSSPLV-AQDRLSITVGVVNAAPAW-SG   | 880 |
| EDZ53094.1             | LLEKYEA-CE--IRFERFLE-LLPALKPRYYSISSSPLV-AQNRLSITVGVVNAAPAW-SG   | 872 |
| EEL81346.1             | -----                                                           | 663 |
| EEL87105.1             | LLEKYEA-CE--IRFERFLE-LLPALKPRYYSISSSPLV-AQNRLSITVGVVNAAPAW-SG   | 886 |
| EEL75761.1             | LLEKYEA-CE--IRFERFLE-LLPALKPRYYSISSSPLV-AHNRLSITVGVVNAAPAW-SG   | 813 |
| ACK88541.1             | LLEKYEA-CE--IRFERFLE-LLPALKPRYYSISSSPLV-AQDRLSITVGVVNAAPAW-SG   | 872 |
| EJQ05303.1             | LLEKYEA-CE--IRFERFLE-LLPALKPRYYSISSSPLV-AQDRLSITVGVVNAAPAW-SG   | 872 |
| EEK50040.1             | LLEKYEA-CE--IRFERFLE-LLPALKPRYYSISSSPLV-AQNRLSITVGVVNAAPAW-SG   | 872 |
| AAS42149.1             | LLEKYEA-CE--IRFERFLE-LLPALKPRYYSISSSPLI-AQDRLSITVGVVNAAPAW-SG   | 872 |
| AAP10153.1             | LLEKYEA-CE--IRFERFLE-LLPALKPRYYSISSSPLV-AHNRLSITVGVVNAAPAW-SG   | 872 |
| EEK83466.1             | LLEKYEA-CE--IRFERFLE-LLPALKPRYYSISSSPLV-AQDRLSITVGVVNAAPAW-SG   | 880 |

|            |                                                               |     |
|------------|---------------------------------------------------------------|-----|
| ACK63698.1 | LLEKYEA-CE--IRFERFLE-LLPALKPRYYSISSSPLV-AHNRLSITVGVVNAPAW-SG  | 813 |
| EJS57156.1 | LLEKYEA-CE--IRFERFLE-LLPALKPRYYSISSSPLV-AHNRLSITVGVVNAPAW-SG  | 872 |
| EJS56605.1 | LLEKYEA-CE--IRFERFLE-LLPALKPRYYSISSSPLV-AQNRLSITVGVVNAPAW-SG  | 872 |
| EJS68951.1 | LLEKYEA-CE--MPFERFLE-LLPALKPRYYSISSSPLV-AEDRLSITVRVVS GPAR-SG | 871 |
| EJQ10567.1 | LLEKYEA-CE--IRFERFLE-LLPALKPRYYSISSSPLV-AQNRLSITVGVVNAPAW-SG  | 872 |
| EJQ13433.1 | LLEKYGA-CE--IRFERFLE-LLPALKPRYYSISSSPLV-AQNRLSITVGVVNAPAW-SG  | 872 |
| EJQ20399.1 | LLEKYEA-CE--IRFERFLE-LLPALKPRYYSISSSPLV-VQNRLSITVGVVNAPAW-SG  | 872 |
| EJQ30236.1 | LLEKYEA-CE--IRFERFLE-LLPALKPRYYSISSSPLV-AQNRLSITVGVVNAPAW-SG  | 872 |
| EJQ51278.1 | LLEKYEA-CE--MPFERFLE-LLPALKPRYYSISSSPLV-AQDRLSITVGVVSGPAR-SG  | 871 |
| EEL10858.1 | LLEKYEA-CE--IRFERFLE-LLPALKPRYYSISSSPLV-AHNRLSITVGVVNAPAW-SG  | 872 |
| EEL05393.1 | LLEKYEA-CE--IRFERFLE-LLPALKPRYYSISSSPLV-AQDRLSITVGVVNAPAW-SG  | 886 |
| EEK94080.1 | LLEKYEA-CE--IRFERFLE-LLPALKPRYYSISSSPLV-AHNRLSITVGVVNAPAW-SG  | 875 |
| EEK99882.1 | LLEKYEA-CE--IRFERFLE-LLPALKPRYYSISSSPLV-AQDRLSITVGVVNAPAW-SG  | 875 |
| EEK55784.1 | LLEKYEA-CE--IRFERFLE-LLPALKPRYYSISSSPLV-AQDRLSITVGVVNAPAW-SG  | 880 |
| ADK05784.1 | LLEKYEA-CE--IRFERFLE-LLPALKPRYYSISSSPLV-AQDRLSITVGVVNAPAW-SG  | 872 |
| AAU17340.1 | LLEKYEA-CE--IRFERFLE-LLPALKPRYYSISSSPLV-AQNRLSITVGVVNAPAW-SG  | 872 |
| EEL64394.1 | LLEKYEA-CE--IRFERFLE-LLPALKPRYYSISSSPLV-AQNRLSITVGVVNAPAW-SG  | 872 |
| AEW56259.1 | LLEKYEA-CE--IRFERFLE-LLPALKPRYYSISSSPLV-AQDRLSITVGVVNAPAW-SG  | 872 |
| AFQ11690.1 | LLEKYEA-CE--IRFERFLE-LLPALKPRYYSISSSPLI-AQDRLSITVGVVNAPAW-SG  | 872 |
| EAL16831.1 | LLEKYEA-CE--IRFERFLE-LLPALKPRYYSISSSPLV-AQDRLSITVGVVNAPAW-SG  | 872 |
| ACK94296.1 | LLEKYEA-CE--IRFERFLE-LLPALKPRYYSISSSPLV-AQNRLSITVGVVNAPAW-SG  | 872 |
| EDZ58760.1 | LLEKYEA-CE--IRFERFLE-LLPALKPRYYSISSSPLV-AQDRLSITVGVVNAPAW-SG  | 872 |
| EJV84218.1 | LLEKYEA-CE--IRFERFLE-LLPALKPRYYSISSSPLV-AQDRLSITVGVVNAPAW-SG  | 872 |
| EJQ69212.1 | LLEKYEA-CE--IRFERFLE-LLPALKPRYYSISSSPLV-AQDRLSITVGVVNAPAW-SG  | 872 |
| EJQ80339.1 | LLEKYEA-CE--LRFERFLE-FLPALKPRYYSISSSPLV-AQDRLSITVGVVNAPAW-SG  | 872 |
| EJV81602.1 | LLEKYEA-CE--IRFERFLE-LLPALKPRYYSISSSPLV-AHNRLSITVGVVNAPAW-SG  | 872 |
| EJQ95474.1 | LLEKYEA-CE--IRFERFLE-LLPALKPRYYSISSSPLV-AQDRLSITVGVVNAPAW-SG  | 872 |
| EEK44229.1 | LLEKYEA-CE--IRFERFLE-LLPALKPRYYSISSSPLV-AQDRLSITVGVVNAPAW-SG  | 880 |
| EEK88560.1 | LLEKYEA-CE--IRFERFLE-LLPALKPRYYSISSSPLV-AHNRLSITVGVVNAPAW-SG  | 872 |
| EJR07451.1 | LLEKYEA-CE--IRFERFLE-LLPALKPRYYSISSSPLV-AQNRLSITVGVVNAPAW-SG  | 869 |
| EJR16542.1 | LLEKYEA-CE--IRFERFLE-LLPALKPRYYSISSSPLV-AQDRLSITVGVVNAPAW-SG  | 872 |
| BAL18840.1 | LLEKYEA-CE--IRFERFLE-LLPALKPRYYSISSSPLV-AQDRLSITVGVVNAPAW-SG  | 872 |
| EDX69960.1 | LLEKYEA-CE--IRFERFLE-LLPALKPRYYSISSSPLV-AQDRLSITVGVVNAPAW-SG  | 872 |
| ACM13462.1 | LLEKYEA-CE--IRFERFLE-LLPALKPRYYSISSSPLV-AQDRLSITVGVVNAPAW-SG  | 872 |
| EEK75631.1 | LLEKYEA-CE--IRFERFLE-LLPALKPRYYSISSSPLV-AQDRLSITVGVVNAPAW-SG  | 872 |
| EEL25491.1 | LLEKYEA-CE--IRFERFLE-LLPALKPRYYSISSSPLV-AHNRLSITVGVVNAPAW-SG  | 813 |
| EEL21990.1 | LLEKYEA-CE--IRFERFLE-LLPALKPRYYSISSSPLV-AQDRLSITVGVVNAPAW-SG  | 880 |
| EEL33825.1 | LLEKYEA-CE--IRFERFLE-LLPALKPRYYSISSSPLV-AQDRLSITVGVVNAPAW-SG  | 880 |

|                        |                                                              |     |
|------------------------|--------------------------------------------------------------|-----|
| EEL44933.1             | LLEKYEA-CE--IRFERFLE-LLPALKPRYYSISSSPLV-AQDRLSITVGVVNAPAW-SG | 880 |
| EEL50167.1             | LLEKYEA-CE--MPFERFLE-LLPALKPRYYSISSSPLV-AQDRLSITVGVVSGPAR-SG | 950 |
| EJR22930.1             | LLEKYEA-CE--IRFERFLE-LLPALKPRYYSISSSPLV-AHNRLSITVGVVNAPAW-SG | 872 |
| EJP91231.1             | LLEKYEA-CE--IRFERFLE-LLPALKPRYYSISSSPLV-AQNRLSITVGVVNAPAW-SG | 872 |
| EJR37623.1             | LLEKYEA-CE--IRFERFLE-LLPALKPRYYSISSSPLV-AHNRLSITVGVVNAPAW-SG | 872 |
| EJR50635.1             | LLEKYEA-CE--IRFERFLE-LLPALKPRYYSISSSPLV-AQDRLSITVGVVNAPAW-SG | 872 |
| EJR64551.1             | LLEKYEA-CE--IRFERFLE-LLPALKPRYYSISSSPLV-AQDRLSITVGVVNAPAW-SG | 872 |
| EJR75620.1             | LLEKYEA-CE--IRFERFLE-LLPALKPRYYSISSSPLV-AHNRLSITVGVVNAPAW-SG | 872 |
| EJR82049.1             | LLEKYEA-CE--IRFERFLE-LLPALKPRYYSISSSPLV-AQNRLSITVGVVNAPAW-SG | 872 |
| EJR83659.1             | LLEKYEA-CE--IRFERFLE-LLPALKPRYYSISSSPLV-AHNRLSITVGVVNAPAW-SG | 872 |
| EJR91135.1             | LIEKYEA-CE--MPFERFLE-LLPPLKPGF-----                          | 841 |
| EJR97241.1             | LLEKYEA-CE--IRFERFLE-LLPALKPRYYSISSSPLV-AQNRLSITVGVVNAPAW-SG | 872 |
| EJS05852.1             | LLEKYEA-CE--IRFERFLE-LLPALKPRYYSISSSPLV-AQDRLSITVGVVNAPAW-SG | 872 |
| EDX58768.1             | LLEKYEA-CE--IRFERFLE-LLPALKPRYYSISSSPLV-AQDRLSITVGVVNAPAW-SG | 872 |
| AAU24352.1             | LLEQYPA-CE--LPFARFLA-LLPPLKPRYYSISSSPQL-NPRQTSITVSVVSGPAL-SG | 867 |
| ABY44122.1             | LLEKYEA-CE--IRFERFLE-LLPALKPRYYSISSSPLV-AQDRLSITVGVVNAPAW-SG | 872 |
| EDW23201.1             | LLDQYEA-CE--LSFVHFLA-LLPGLKPRYYSISSSPKV-DEKRVSITVAVVKGKAW-SG | 857 |
| ABV62358.1             | LLDQYEA-CE--MPFAHFLA-LLPGLKPRYYSISSSPKI-DEKRVSITVAVVKGKAW-SG | 857 |
| EIF12263.1             | LLEKYEA-CE--LPFERFLE-LLRPLKPRYYSISSSPRK-HPGQASITVGVVSGPAR-SG | 868 |
| EIF14027.1             | LLEDYPA-CE--LPFERFLE-LLPSLKARYYSISSSPKA-ASGELSITVGVVTAPAW-SG | 860 |
| EHL75405.1             | LLEKYEA-CE--IRFERFLE-LLPALKPRYYSISSSPLV-AQNRLSITVGVVNAPAW-SG | 872 |
| EJD67577.1             | LLEKYEA-CE--LPFERFLE-LLRPLKPRYYSISSSPRK-HPGQASITVGVVSGPAR-SG | 868 |
| EJD68347.1             | LLEDYPA-CE--LPFERFLE-LLPSLKARYYSISSSPKA-TSGELSITVGVVTAPAW-SG | 860 |
| EFV73436.1             | LLEQYPA-CE--LPFARFLA-LLPPLKPRYYSISSSPQL-NPRQTSITVSVVSGPAL-SG | 881 |
| CBY93692.1             | LLEKYEA-CE--IRFERFLE-LLPALKPRYYSISSSPLV-AQDRLSITVGVVNAPAW-SG | 872 |
| AFI27355.1             | LLEKYEA-CD--MPFERFLE-LLRPLKPRYYSISSSPRV-NPGQASITVGVVSGPAW-SG | 869 |
| AFI29229.1             | LLEDYPA-CE--MPFERFLA-LLPSLKPRYYSISSSPKA-HANIVSMTVGVVKASAW-SG | 861 |
| EIL85422.1             | LLEQYEA-CE--LPFDHFLA-LLPGLKPRYYSISSSPKV-DEKRLSITVAVVKGKSW-SG | 857 |
| ADV93500.1             | FLEDYPA-CE--MPFERFLA-LLPSLKPRYYSISSSPKV-HANIVSMTVGVVKASAW-SG | 861 |
| ADV95715.1             | LLEKYEA-CD--MPFERFLE-LLRPLKPRYYSISSSPRV-NPRQASITVGVVSGPAW-SG | 869 |
| BAI84248.1             | LLEKYEA-CD--MPFERFLE-LLRPLKPRYYSISSSPRV-NPRLASITVGVVSGPAW-SG | 869 |
| EFG90288.1             | LLEDYPA-CE--MPFERFLA-LLPSLKPRYYSISSSPKV-HANIVSMTVGVVKASAW-SG | 861 |
| EFG91781.1             | LLEQYES-CE--MPFERFLE-LLRPLKPRYYSISSSPRV-NPEQASITVGVVSGPAW-SG | 869 |
| AEP85668.1             | LLEQYEA-CD--MPFERFLE-LLRPLKPRYYSISSSPRV-NPEQASITVGVVHGPAW-SG | 869 |
| AEP87558.1             | FLEDYPA-CE--MPFERFLA-LLPSLKPRYYSISSSPKV-HANIVSMTVGVVKDSAW-SG | 861 |
| sp 008336.1 CYPB_BACSU | FLEDYPA-CE--MPFERFLA-LLPSLKPRYYSISSSPKV-HANIVSMTVGVVKASAW-SG | 861 |
| sp 008394.1 CYPD_BACSU | LLEKYEA-CD--MPFERFLE-LLRPLKPRYYSISSSPRV-NPRQASITVGVVSGPAW-SG | 869 |
| AEP89812.1             | LLEKYEA-CD--MPFERFLE-LLRPLKPRYYSISSSPRV-NPRQASITVGVVSGPAW-SG | 869 |

|            |                                                                |     |
|------------|----------------------------------------------------------------|-----|
| AEP91702.1 | FLEDYPA-CE--MPFERFLA-LLPSLKPRYYSISSSPKV-HANIVSMTVGVVKASAW-SG   | 861 |
| EHA31094.1 | FLEDYPA-CE--MPFERFLA-LLPSLKPRYYSISSSPKV-HANIVSMTVGVVKASAW-SG   | 863 |
| ADH07708.1 | LLEKYEA-CE--IRFERFLE-LLPALKPRYYSISSSPLV-AHNRLSITVGVVNAPAW-SG   | 872 |
| EEM28177.1 | LLEKYEA-CE--IRFERFLE-LLPALKPRYYSISSSPLV-AHNRLSITVGVVNAPAW-SG   | 872 |
| AFQ14162.1 | LLEKYEA-CE--IRFERFLE-LLPALKPRYYSISSSPLV-AQNRLSITVGVVNAPAW-SG   | 872 |
| EEM95517.1 | LLEKYEA-CE--IQFERFLE-LLPALKPRYYSISSSPLV-AQDRLSITVGVVNAPAW-SG   | 872 |
| EEN02344.1 | LLEKYKA-CE--IRFERFLE-LLPALKPRYYSISSSPLV-AQNRLSITVGVVNAPAW-SG   | 872 |
| AFU13781.1 | LLEKYEA-CE--IRFERFLE-LLPALKPRYYSISSSPLV-AQDRLSITVGVVNAPAW-SG   | 880 |
| EEM70897.1 | LLEKYEA-CE--IRFERFLE-LLPALKPRYYSISSSPLV-AQDRLSITVGVVNAPAW-SG   | 880 |
| ADY22413.1 | LLEKYEA-CE--IRFERFLE-LLPALKPRYYSISSSPLV-AQDRLSITVGVVNAPAW-SG   | 872 |
| EEM82895.1 | LLEKYEA-CE--IRFERFLE-LLPALKPRYYSISSSPLV-AHNRLSITVGVVNAPAW-SG   | 872 |
| EEM52818.1 | LLEKYEA-CE--IRFERFLE-LLPALKPRYYSISSSPLV-VQNRLSITVGVVNAPAW-SG   | 872 |
| EEM59126.1 | LLEKYEA-CE--IRFERFLE-LLPALKPRYYSISSSPLV-AQDRLSITVGVVNAPAW-SG   | 880 |
| EEM47193.1 | LLEKYEA-CE--IRFERFLE-LLPALKPRYYSISSSPLV-AHNRLSITVGVVNAPAW-SG   | 813 |
| EEM76899.1 | LLEKYEA-CE--IRFERFLE-LLPALKPRYYSISSSPLV-AQDRLSITVGVVNAPAW-SG   | 880 |
| EEM88909.1 | LLEKYEA-CE--IRFERFLE-LLPALKPRYYSISSSPLV-AKDRLSITVGVVNAPAW-SG   | 880 |
| EEM38196.1 | LLEKYEA-CE--IRFERFLE-LLPALKPRYYSISSSPLV-AQNRLSITVGVVNAPAW-SG   | 872 |
| EEM21858.1 | LLEKYEA-CE--IRFERFLE-LLPALKPRYYSISSSPLV-AQDRLSITVGVVNAPAW-SG   | 875 |
| ABK86139.1 | LLEKYEA-CE--IRFERFLE-LLPALKPRYYSISSSPLV-AQDRLSITVGVVNAPAW-SG   | 880 |
| EJQ37805.1 | LLEKYEA-CE--IRFERFLE-LLPALKPRYYSISSSPLV-AQDRLSITVGVVNAPAW-SG   | 872 |
| CCF04242.1 | LLEKYEA-CE--LPFERFLE-LLRPLKPRYYSISSSPRK-HPGQASITVGVVRGPAPAR-SG | 868 |
| CCF05972.1 | LLEDYPA-CE--LPFERFLE-LLPSLKARYYSISSSPKA-NKRELSITVGVVTAPAW-SG   | 860 |
| ABS73124.1 | LLEKYEA-CE--LPFERFLE-LLRPLKPRYYSISSSPRK-HPGQASITVGVVRGPAPAR-SG | 868 |
| ABS74786.1 | LLEDYPA-CE--LPFERFLE-LLPSLKARYYSISSSPKA-TSGELSITVGVVTAPAW-SG   | 860 |
| EKE46398.1 | LLEKYEA-CE--LPFERFLE-LLRPLKPRYYSISSSPRK-HPGQASITVGVVRGPAPAR-SG | 868 |
| EKE48022.1 | LLEDYPA-CE--LPFERFLE-LLPSLKARYYSISSSPKA-NKRELSITVGVVTAPAW-SG   | 860 |
| CCG48683.1 | LLEKYEA-CE--LPFERFLE-LLRPLKPRYYSISSSPRK-HPGQASITVGVVRGPAPAR-SG | 868 |
| AFJ60789.1 | LLEKYEA-CE--LPFERFLE-LLRPLKPRYYSISSSPRK-HPGQASITVGVVRGPAPAR-SG | 875 |
| AFJ62808.1 | LLEDYPA-CE--LPFERFLE-LLPSLKARYYSISSSPKA-ASGELSITVGVVTAPAW-SG   | 860 |
| EEK66903.1 | LLEKYEA-CE--IRFERFLE-LLPALKSRYYSISSSPLV-AQDRLSITVGVVNAPAW-SG   | 886 |
| EJQ52935.1 | LLEKYEA-CE--LRFERFLE-LLPALKPRYYSISSSPLV-AQDRLSITVGVVHAPAW-SG   | 872 |
| EJS69574.1 | LLEKYEA-CE--LRFERFLE-LLPALKPRYYSISSSPLV-AQDRLSITVGVVNAPAW-SG   | 872 |
| EJV63294.1 | LLEKYEA-CE--LRFERFLE-LLPALKPRYYSISSSPLV-AQDRLSITVGVVNAPAW-SG   | 872 |
| EKF35778.1 | LIEQYEA-CE--LPFHHFLA-LLPGLKPRYYSISSSPKV-DEKRLSITVAVVKGKAW-SG   | 857 |
| EGP08506.1 | LLEEYPA-CE--LPFHVYLE-MLSLLSPRYYSISSSPASLGANKCSVTVGVVDAPAT-SG   | 890 |
| BAL78328.1 | LLLEYPA-CE--LPFHVYLE-MLSLLAPRYYSISSSPSV-DPARCSITVGVVEGPAA-SG   | 885 |
| BAC48147.1 | LLLEYPA-CE--LPFHVYLE-MLSLLAPRYYSISSSPSV-DPARCSITVGVVEGPAA-SG   | 886 |
| BAL12135.1 | MLLEYPA-CE--LPFHVYLE-MLSLLAPRYYSISSSPSV-DPARCSVTVGVVEGPAA-SG   | 886 |

|            |                                                               |     |
|------------|---------------------------------------------------------------|-----|
| CCE00185.1 | LLEDFPA-CE--LPFHSTYLE-MLTLLAPRYYSISSSPSG-DPARCSVTVGVVAGPAL-SG | 889 |
| EIG57609.1 | LLLEYPA-CE--LPFHVYLE-MLSLLAPRYYSISSSPSV-DPVRCSVTVGVVEGPAA-SG  | 885 |
| EHR02046.1 | LLLEYPA-CE--LPFHVYLE-MLSLLAPRYYSISSSPSV-DPVRCSVTVGVVEGPAA-SG  | 885 |
| EJN11211.1 | -----                                                         | 670 |
| CCF15606.1 | LMEQYPA-CE--LPFERFLE-LLPPLKARYYSISSPHL-LPDRASITVSVVVRGPAA-SG  | 807 |
| CCF12687.1 | LLEKYEA-CE--MPFERVIE-LLPPLQPKYYTITSSPEN-SPQQASIMIGADS--LE-SE  | 868 |
| ABB05850.1 | LLERFGS-VD--LSLEKFLD-MLPALKARQYSISSSPLW-KADHVTLTVAVVDAPAL-SG  | 871 |
| EHP43606.1 | VLVRHPA-IE--LTLPGLLA-CTVAIRPRFYSIASSPLV-SPEVATITVGTVWSPAL-SG  | 907 |
| ABF10339.1 | VLVEHPA-IA--LTLQELLA-CTVPMRPRLYSIASSPLV-SPDVATLLVGTVCAPAL-SG  | 874 |
| CAJ95800.1 | VLDRFPA-IE--VDLAGLLA-CTVPMRPRFYSIASSPLV-SPGVATITVGTVWSPAL-SG  | 905 |
| AEI79937.1 | VLDRFPA-IE--LDLAGLLA-CTVPMRPRFYSIASSPLV-SPDVATITVGTVWSAAL-SG  | 905 |
| AFD27790.1 | LLERVQG-CE--LDFAEFLE-MLPPLRARQYSVSSSPLL-RPGGCSLTVAVVDAPAH-SG  | 866 |
| ABC62112.1 | MLEEFPA-CD--VPLAVFLE-LIPFLSPRYYSISSAPEA-NQGLCSITVGVVKGPAAL-AG | 879 |
| EAQ27850.1 | LLEDYPA-CD--LPLAVFLE-MIPFLSPRYYSISSAPGD-TPQTCSTVGVVKGPAAL-SG  | 880 |
| EIT84377.1 | LLDRYEA-CE--LPFSLFLG-SLKPLRPRFYSISSAPTV-CKGRVSITVAVVSGKAY-GG  | 857 |
| CCG43686.1 | LLEDYLS-CE--VPFERFLA-LLPPLKARYYSISSSPRK-HSEEASVTVSVVKDTAW-SG  | 862 |
| ABX05160.1 | MLEQYPS-SV--LDFGEFLE-LLPAMRVQYSISSSSLV-NPNQASLTVAVVDAPAA-SG   | 862 |
| BAJ96920.1 | LLNLYPS-CK--IPLGLFLE-MLPMMRTREYSISSSPLW-KEDCCTITLSVVDAPAA-SG  | 856 |
| GAB96874.1 | LLERFAS-ID--VSLATYLG-MLTPLSPRQYSISSSARW-SQDHATLTVAHLSAPAL-SG  | 917 |
| EFH80345.1 | LLEDNPA-SE--LPFHMYLE-MLPPIRPRYYSISSSPLK-DAEQCSITVGVVIDEPAW-SG | 883 |
| EFH88481.1 | LLEEYPS-CT--IPFNVFLD-CLTPLRPRYYSISSSPLL-KPDECSSLVGMVQGPAA-SG  | 888 |
| EAW32450.1 | LLDCYSS-ID--LPFATYVD-QLAELQPRYYSIASSHLT-SAGSVDIAVSRVAGAAL-GG  | 870 |
| EIZ82104.1 | LLERVPA-CE--LAFGAFLA-ALPAMRTRQYSISSSPLR-DPTRCSLTVSVDAPAA-AG   | 872 |
| AEV70722.1 | CLLEFAA-CQ--ITGAELLE-MLEPMTPRHYSIASSSRR-SPGVVHLIVSVDAPAA-SG   | 858 |
| EFC41452.1 | IVHDLKS-CT--IPLGNFLD-ISIPMRTRQYSISSSPLW-NKDKCTITVGVLRAPAT-HG  | 889 |
| ACV78954.1 | LATEYPPDQP--IPPALVVE-AFPMLKPRPYSISSAPIG-EPNRVGITVGLVSGQAL-SG  | 906 |
| ACV78964.1 | LLERYPD-CA--IPFAVYLD-LLPALQPRYYSISSSPLV-SPAECTITAGVLRAPAA-GR  | 883 |
| ACV81379.1 | LLERYPA-CA--LPFPVFLD-LLPALAPRYYSISSSPLA-SPDTCVTEGVLAEPAA-SG   | 879 |
| EIZ78677.1 | LLERFPA-CE--LKLAQFLS-ALPPMRARQYSISSSPLR-DPACCSTVSVLDAPAA-AG   | 864 |
| EJW15291.1 | LLEKYEA-CL--MTFERFLE-LLPPLKIRYYSISSSPRV-QPNQISLTVGVVQSPAA-NG  | 869 |
| EJW16173.1 | LLEKYEA-CE--MPFERFLE-LLPPLKARYYSISSSPRI-QEKRASITVGVVVRGPAA-SG | 869 |
| EHQ58913.1 | LLEKYEA-CE--MPFERFLE-LLPPLKARYYSMSSSPRV-QPRQASITVSVVQGPAA-SG  | 867 |
| EHQ59900.1 | LLEKYPA-CE--LPFQRFIE-LLPPLKARYYSISSSPKA-LPDRVSITVGVVVRGPAA-SG | 866 |
| EHB66924.1 | LLERYEA-CE--LPFERFLE-LLPPLKPRYYSISSSPRV-SRNTASITVSVVRDSAA-SG  | 867 |
| AFH60445.1 | LLEKYPA-CE--LPFERFLE-LLPPLKARYYSISSSPRV-LGDRVSITVSVVVRGPAA-SG | 866 |
| AEI42011.1 | LLEKYPA-CE--LPFERFLE-LLPPLKARYYSISSSPRV-LGDRVSITVSVVVRGPAA-SG | 866 |
| ADO57681.1 | ILEKYPA-CE--LPFENFIS-LLPPLKPRYYSISSSPLS-SENSASITVSVVVRGPAA-SG | 865 |
| EGG32133.1 | LLERYEA-CE--LPFERFLE-LLPPLKPRYYSISSSPKV-SRNTASITVSVVRDRAW-SG  | 869 |

|            |                                                               |      |
|------------|---------------------------------------------------------------|------|
| EGL17662.1 | LLERYEA-CE--LGFERFLE-LLPPLKPRYYSISSAPQV-QPEEASITVGVVKGPAW-SG  | 868  |
| ACX65034.1 | LLERYEA-CE--LPFERFLE-LLPPLKPRYYSISSSPKV-SRNTASVTVSVVRDRAW-SG  | 869  |
| ACT11327.1 | LLYRFQS-CP--TDFRRLT-MLPSIKARQYSISSSPAW-KPDHVTLTVAVVDSPAL-SG   | 867  |
| AEA28016.1 | LLDAYPS-CD--LSFAQFLD-MLPPLRPRYYSISSAPSE--SETCHITVGVLDVDPAR-GR | 885  |
| EFP68091.1 | LLIRFPA-IE--LTLEAFLA-RLGPMRPRFYSIASSARV-SPGVAALTVGTVSGPAW-SG  | 888  |
| EGY61507.1 | LLIRFPA-IE--LTLEAFLA-RLGPMRPRFYSIASSARV-SPGVAALTVGTVSGPAW-SG  | 888  |
| EIE85788.1 | LISAYPQVNR--LDLGQFLA-AVPVIQPRRYSIACSPLV-YPQHAHLTVGVVDDVIN---  | 1008 |
| EIE92534.1 | LIHAYPQVNR--LIDLQFLA-AVPVIQPRRYSIASSPLS-YPKHAHLAVGVVDDVNV---  | 1010 |
| BAE46296.1 | -----                                                         | 510  |
| BAH31604.1 | -----                                                         | 466  |
| EEN84644.1 | -----                                                         | 466  |
| EEN88978.1 | -----                                                         | 550  |
| ABG96413.1 | -----                                                         | 498  |
| BAH52971.1 | -----                                                         | 465  |
| EHI44575.1 | -----                                                         | 500  |
| EID73168.1 | -----                                                         | 465  |
| EHK83749.1 | -----                                                         | 441  |
| EJI96173.1 | -----                                                         | 465  |
| ABI79384.1 | -----                                                         | 497  |
| CAR47816.1 | -----                                                         | 498  |
| AEK26937.1 | -----                                                         | 473  |
| ABE39056.1 | LMQEHPA-CE--LPLHAYLE-MLSPLAPRYYSISSSPLR-DPSRAAITVAVVDGPAL-SG  | 883  |
| ABD08340.1 | LLQEHPA-CE--LPFAAYLE-MLTPLQPRYYSISSSPAR-DPARASVTVAVVEGPAL-SG  | 880  |
| CAM03474.1 | LIEDHPA-LRDALSWSALLE-LLPATRPRQYSVSSSPAV-DPRHVDMVSVLRAPAR-SG   | 870  |
| EJF54063.1 | IIEQFPG-AK--IDLGQFIT-ALPAMRPTYSISSSVKQ-SADKASLVISCIKGAAW-SG   | 879  |
| AFC23737.1 | IIEQFPG-AK--IDLGQFIS-ALPAMRPTYSISSSVKQ-STDKASLVVSCIKGAAW-SG   | 867  |
| ADG98903.1 | -----                                                         | 471  |
| EGI54680.1 | LLERFAS-AD--MALGVFIA-ALPPMRARQYSIASSPLV-DPSRCALTVSVLEVPAL-GV  | 861  |
| AEW97204.1 | LVERYPA-LTGRLDWPTVLGTLQPQIRIRHYSVSSSPAV-SPGHVDMVSLLEADG----   | 878  |
| CAJ88567.1 | -----                                                         | 516  |
| BAC68285.1 | LLERFPA-VE--LPLAVFLE-MMGPIRPRFYSISSSPLA-NPRHVRLTVGLLEGPAL-SG  | 882  |
| BAC75137.1 | -----                                                         | 504  |
| EDY51256.1 | LLERNAS-CR--PGLADLLD-ILVPMNLRYYSVSSSPAL-APGSADLMVAAAPVPHR-SG  | 879  |
| EFG07822.1 | LLERNAS-CR--PGLADLLD-ILVPMNLRYYSVSSSPAL-APGSADLMVAAAPVPHR-SG  | 911  |
| EHN78335.1 | -----                                                         | 525  |
| CAB66201.1 | -----                                                         | 527  |
| EGG48117.1 | -----                                                         | 517  |
| EFL20831.1 | LLERFRA-CE--LPFERFLE-LLPVLPRPHYSISSSAQA-APGEVDMVSLLAAPHR-GG   | 886  |

|            |                                                               |     |
|------------|---------------------------------------------------------------|-----|
| EFL28515.1 | LIEANPA-LRETLTWPVLE-LLPPLRPRHYSVSSSPAV-SPRHVDLMVSLLRDE-----   | 867 |
| AEY93311.1 | -----                                                         | 542 |
| AEY93321.1 | LAEDHPA-LRGALDWPLLLD-LLTPLRPRHYSISSAPAA-DPRHADLMVSVLDAPAR-SG  | 879 |
| EFD71156.1 | -----                                                         | 529 |
| CBG67789.1 | LLERHRA-CE--LPFERFLE-LLPVLRPRPYSISSSALA-APGEVDLMVSLLAAPHR-AG  | 882 |
| CBG68112.1 | -----                                                         | 513 |
| EFL10082.1 | -----                                                         | 501 |
| EFF88741.1 | LLERYRA-CA--LPFERFLE-LLPVLRPRHYSVSSSAEA-APGEVDLMVSLLAAPHR-SG  | 883 |
| EDY58112.1 | -----                                                         | 506 |
| EFL36674.1 | -----                                                         | 510 |
| EFL36680.1 | I IEDHPA-LRGALDWPRLLD-LLTPLRPRHYSISSSPAV-DPGHADLMVSLLEAPAR-SG | 916 |
| EFE65335.1 | -----                                                         | 526 |
| EGX54696.1 | -----                                                         | 491 |
| ACZ89135.1 | LLDTHPS-LD--TPFGEFLD-MLPAMVRQYSISSSPRW-NPAHCTLTVGVVDPAL-SG    | 864 |
| ABD83817.1 | LLEEFPA-IE--LPFPAYLE-MLSLLAPRYYSISSSPTG-DASRCSITVGVVSCPASSTG  | 887 |
| ADU39615.1 | LLEEHRA-CQ--VPFAVFLE-MLSPLSPRYYSISSSPSM-TPGRCSVTVGVVSEPAL-SG  | 883 |
| EJL72014.1 | LLEEHRA-CQ--VPFAVFLE-MLSPLSPRYYSISSSPTM-TPGKCSVTVGVVSGPAR-SG  | 883 |

```

sp|P14779.2|CPXB_PRIM2      -YGEYKGIASNYLAELQEGDTITCFISTPQ-SEFTLPKDP-ETPLIMVGP GTGVAPFRGF 914
ADF40088.1                  -YGEYKGIASNYLAELQEGDTITCFISTPQ-SEFTLPKDP-ETPLIMVGP GTGVAPFRGF 914
ADE70259.1                  -YGEYKGIASNYLANLQEGDTITCFVSTPQ-SGFTLPKGP-ETPLIMVGP GTGVAPFRGF 914
AEN88827.1                  -YGEYKGIASNYLAELQEGDTITCFISTPQ-SGFALPKDS-QTPIIMVGP GTGVAPFRGF 914
KFN05180.1                  -YGEYKGIASNYLAELQEGDTITCFISTPQ-SEFTLPKDP-ETPLIMVGP GTGVAPFRGF 914
ACZ37122.1                  -YGEYKGIASNYLANLQEGDTITCFVSTPQ-SGFTLPKGP-ETPLIMVGP GTGVAPFRGF 914
ADA57055.1                  -YGEYKGIASNYLANLQEGDTITCFVSTPQ-SGFTLPKDS-ETPLIMVGP GTGVAPFRGF 914
ADA57058.1                  -YGEYKGIASNYLANLQEGDTITCFVSTPQ-SGFTLPKGP-ETPLIMVGP GTGVAPFRGF 914
ADA57059.1                  -YGEYKGIASNYLANLQEGDTITCFVSTPQ-SGFTLPKDS-ETPLIMVGP GTGVAPFRGF 914
ADA57061.1                  -YGEYKGIASNYLANLQEGDTITCFVSTPQ-SGFTLPKGP-ETPLIMVGP GTGVAPFRGF 914
ADA57062.1                  -YGEYKGIASNYLANLQEGDTITCFVSTPQ-SGFTLPKDS-ETPLIMVGP GTGVAPFRSF 914
ADA57068.1                  -YGEYKGIASNYLANLQEGDTITCFVSTPQ-SGFTLPKGP-ETPLIMVGP GTGVAPFRGF 914
AAT62301.1                  -EGTYEGVASNYLAQRHNKDEIICFIRTPQ-SNFQLPENP-ETPIIMVGP GTGIAPFRGF 929
AAM54108.1                  -----TGVTSGYLSRV RPD R VAVG IASPP-ESFRPPADN-TVPVVLIAAGTGIAPFRGF 886
EFQ83738.1                  ----- 505
EFL88452.1                  -KGRYLGTCSNYLAGLKEGSSFHAATRQPS-AGFTLPEDP-LRPVIMIGP GTGIAPFRGF 931
BAF89518.1                  --VRHDGLCSSYLVSCGEDAPVRV LVKDTG-STFHLPADP-AVPLILVGP GTGLAPLRGF 1032
CBI43648.1                  -RGEYRGVASNYLAGLQNGDSAVCFIRSPQ-SGFALPENT-KTPLIMIGAGTGIAPFRGF 917
AEB22839.1                  -LGEYRGVASNYLADRSPDDGIVMFVRTPE-TKFRLPEDP-EKPIIMVGP GTGVAPFRGF 926
EDT22025.1                  -EGTYEGVASNYLAQRHNKDEIICFIRTPQ-SNFQLPENP-ETPIIMVGP GTGIAPFRGF 929
AFH84458.1                  -EGTYEGVASNYLAQRHNKDEIICFIRTPQ-SNFQLPENP-ETPIIMVGP GTGIAPFRGF 937
ADP31197.1                  -HGEYRGVASNYLADRTPGDDIDMFVRTPE-SRFQLPEDP-EKPIIMVGP GTGVAPFRGF 926
ACP19384.1                  -EGTYEGVASNYLAQRHNKDEIICFIRTPQ-SNFELPKDP-ETPIIMVGP GTGIAPFRGF 929
ADL27534.1                  -EGTYEGVASNYLAQRHNKDEIICFIRTPQ-SNFELPKDP-ETPIIMGGP GTGIAPFRGF 929
ACO29732.1                  -EGTYEGVASNYLAQRHNKEE IICFIRTPQ-SNFQLPENP-ETPIIMVGP GTGIAPFRGF 929
EDX65100.1                  -EGTYEGVASNYLAQRHNKDEIICFIRTPQ-SNFQLPENP-ETPIIMVGP GTGIAPFRGF 929
EEK61456.1                  -EGTYEGVASNYLAQRHNKDEIICFIRTPQ-SNFELPKDP-ETPIIMVGP GTGIAPFRGF 929
EEL16232.1                  -EGTYEGVASNYLAQRHNKDEIICFIRTPQ-SNFQLPENP-ETPIIMVGP GTGIAPFRGF 937
EDZ53094.1                  -EGTYEGVASNYLAQRHNKDEIICFIRTPQ-SNFELPKDP-ETPIIMVGP GTGIAPFRGF 929
EEL81346.1                  ----- 663
EEL87105.1                  -VGTYEGVASNYLAQRHNKDEIICFIRTPQ-SNFQLPENP-ETPIIMVGP GTGIAPFRGF 943
EEL75761.1                  -EGTYEGVASNYLAQRHNKDEIICFIRTPQ-SNFELPKNP-ETPIIMVGP GTGIAPFRGF 870
ACK88541.1                  -EGTYEGVASNYLAQRHNKDEIICFIRTPQ-SNFQLPENP-ETPIIMVGP GTGIAPFRGF 929
EJQ05303.1                  -EGTYEGVASNYLAQRHNKDEIICFIRTPQ-SNFQLPENL-ETPIIMVGP GTGIAPFRGF 929
EEK50040.1                  -EGTYEGVASNYLAQRHNKDEIICFIRTPQ-SNFELPKDP-ETPIIMVGP GTGIAPFRGF 929
AAS42149.1                  -EGTYEGVASNYLAQRHNKDEIICFIRTPQ-SNFQLPENP-ETPIIMVGP GTGIAPFRGF 929
AAP10153.1                  -EGTYEGVASNYLAQRHNKDEIICFIRTPQ-SNFELPKDP-ETPIIMVGP GTGIAPFRGF 929
EEK83466.1                  -EGTYEGVASNYLAQRHNKDEIICFIRTPQ-SNFQLPENP-ETPIIMVGP GTGIAPFRGF 937

```

|            |                                                               |     |
|------------|---------------------------------------------------------------|-----|
| ACK63698.1 | -EGTYEGVASNYLAQRHNKDEIICFIRTPQ-SNFELPKDP-ETPIIMVGPGTGIAPFRGF  | 870 |
| EJS57156.1 | -EGTYEGVASNYLAQRHSKDEIICFIRTPQ-SNFELPKDP-ETPIIMVGPGTGIAPFRGF  | 929 |
| EJS56605.1 | -VGTYEGVASNYLAQRHNKDEIICFIRTPQ-SNFQLPENP-ETPIIMVGPGTGIAPFRGF  | 929 |
| EJS68951.1 | -QGEYKGVASNYLAQRHNEDNIACFIRTPQ-SGFQLPKNP-ETPIIMVGPGTGIAPFRGF  | 928 |
| EJQ10567.1 | -EGTYEGVASNYLAQRHNKDEIICFIRTPQ-SNFELPKDP-ETPIIMVGPGTGIAPFRGF  | 929 |
| EJQ13433.1 | -EGTYEGVASNYLAQRHNKDEIICFIRTPQ-SNFQLPENP-ETPIIMVGPGTGIAPFRGF  | 929 |
| EJQ20399.1 | -EGTYEGVASNYLAQRHNKDEIICFIRTPQ-SNFELPKDP-ETPIIMVGPGTGIAPFRGF  | 929 |
| EJQ30236.1 | -EGTYEGVASNYLAQRHNKDEIICFIRTPQ-SNFELPKDP-ETPIIMVGPGTGIAPFRGF  | 929 |
| EJQ51278.1 | -QGEYKGVASNYLAQCHNEDNIACFIRTPQ-SGFQLPKNP-ETPIIMVGPGTGIAPFRGF  | 928 |
| EEL10858.1 | -EGTYEGVASNYLAQRHNKDEIICFIRTPQ-SNFELPKDP-ETPIIMVGPGTGIAPFRGF  | 929 |
| EEL05393.1 | -VGTYEGVASNYLAQRHNKDEIICFIRTPQ-SNFQLPENP-ETPIIMVGPGTGIAPFRGF  | 943 |
| EEK94080.1 | -EGTYEGVASNYLAQRHNKDEIICFIRTPQ-SNFELPKNP-ETPIIMVGPGTGIAPFRGF  | 932 |
| EEK99882.1 | -EGTYEGVASNYLAQRHNKDEIICFIRTPQ-SNFQLPENL-ETPIIMVGPGTGIAPFRGF  | 932 |
| EEK55784.1 | -EGTYEGVASNYLAQRHNKEEIIICFIRTPQ-SNFQLPENP-ETPIIMVGPGTGIAPFRGF | 937 |
| ADK05784.1 | -EGTYEGVASNYLAQRHNKDEIICFIRTPQ-SNFQLSENP-ETPIIMVGPGTGIAPFRGF  | 929 |
| AAU17340.1 | -EGTYEGVASNYLAQLHNKDEIICFIRTPQ-SNFQLPENP-ETPIIMVGPGTGIAPFRGF  | 929 |
| EEL64394.1 | -EGTYEGVASNYLAQRHNKDEIICFIRTPQ-SNFELPKDP-ETPIIMVGPGTGIAPFRGF  | 929 |
| AEW56259.1 | -EGTYEGVASNYLAQRHNKDEIICFIRTPQ-SNFQLPENP-ETPIIMVGPGTGIAPFRGF  | 929 |
| AFQ11690.1 | -EGTYEGVASNYLAQRHNQDEIICFIRTPQ-SNFQLPENP-ETPIIMVGPGTGIAPFRGF  | 929 |
| EAL16831.1 | -EGTYEGVASNYLAQRHNKDEIICFIRTPQ-SNFQLPENP-ETPIIMVGPGTGIAPFRGF  | 929 |
| ACK94296.1 | -EGTYEGVASNYLAQRHNKDEIICFIRTPQ-SNFELPKDP-ETPIIMVGPGTGVAPFRGF  | 929 |
| EDZ58760.1 | -EGTYEGVASNYLAQRHNKDEIICFIRTPQ-SNFQLPENL-ETPIIMVGPGTGIAPFRGF  | 929 |
| EJV84218.1 | -VGTYEGVASNYLAQRHNKDEIICFIRTPQ-SNFQLPENP-ETPIIMVGPGTGIAPFRGF  | 929 |
| EJQ69212.1 | -EGTYEGVASNYLAQRHNKDEIICFIRTPQ-SNFQLPENP-ETPIIMVGPGTGVAPFRGF  | 929 |
| EJQ80339.1 | -QGTYEGVASNYLAQRNNKDEIICFIRTPQ-SNFQLPEDP-ETPIIMVGPGTGIAPFRGF  | 929 |
| EJV81602.1 | -EGTYEGVASNYLAQRHSKDEIICFIRTPQ-SNFELPKDP-ETPIIMVGPGTGIAPFRGF  | 929 |
| EJQ95474.1 | -EGTYEGVASNYLAQRHNKDEIICFIRTPQ-SNFQLPENP-ETPIIMVGPGTGIAPFRGF  | 929 |
| EEK44229.1 | -EGTYEGVASNYLAQRHNKDEIICFIRTPQ-SNFQLPENP-ETPIIMVGPGTGIAPFRGF  | 937 |
| EEK88560.1 | -EGTYEGVASNYLAQRHSKDAIICFIRTPQ-SNFELPKDP-ETPIIMVGPGTGIAPFRGF  | 929 |
| EJR07451.1 | -EGTYEGVASNYLAQRHNKDEIICFIRTPQ-SNFELPKDP-ETPIIMVGPGTGVAPFRGF  | 926 |
| EJR16542.1 | -EGTYEGVASNYLAQRHNKDEIICFIRTPQ-SNFQLPENP-ETPIIMVGPGTGIAPFRGF  | 929 |
| BAL18840.1 | -EGTYEGVASNYLAQRHNKDEIICFIRTPQ-SNFQLPENL-ETPIIMVGPGTGIAPFRGF  | 929 |
| EDX69960.1 | -EGTYEGVASNYLAQRHNKDEIICFIRTPQ-SNFQLPENP-ETPIIMVGPGTGIAPFRGF  | 929 |
| ACM13462.1 | -EGTYEGVASNYLAQRHNKDEIICFIRTPQ-SNFQLPENP-ETPIIMVGPGTGIAPFRGF  | 929 |
| EEK75631.1 | -EGTYEGVASNYLARRHNKDEIICFIRTPQ-SNFQLPGNP-ETPIIMVGPGTGIAPFRGF  | 929 |
| EEL25491.1 | -EGTYEGVASNYLAQRHNKDEIICFIRTPQ-SNFELPKDP-ETPIIMVGPGTGIAPFRGF  | 870 |
| EEL21990.1 | -EGTYEGVASNYLAQRHNKDEIICFIRTPQ-SNFQLPENP-ETPIIMVGPGTGIAPFRGF  | 937 |
| EEL33825.1 | -EGTYEGVASNYLAQRHNKDEIICFIRTPQ-SNFQLPENP-ETPIIMVGPGTGIAPFRGF  | 937 |

|                        |                                                               |      |
|------------------------|---------------------------------------------------------------|------|
| EEL44933.1             | -EGIYEGVASNYLAQRHNKDEIICFIRTPQ-SNFQLPENP-ETPIIMVGP GTGIAPFRGF | 937  |
| EEL50167.1             | -RGEYKGVASNYLAQRHNEDNIACFIRTPQ-SGFQLPKNP-ETPIIMVGP GTGIAPFRGF | 1007 |
| EJR22930.1             | -EGTYEGVASNYLAQRHNKDEIICFIRTPQ-SNFELPKDP-ETPIIMVGP GTGIAPFCGF | 929  |
| EJP91231.1             | -EGTYEGVASNYLAQRHNKDEIICFIRTPQ-SNFELPKDP-ETPIIMVGP GTGVAPFRGF | 929  |
| EJR37623.1             | -EGTYEGVASNYLAQRHNKDEIICFIRTPQ-SNFELPKDP-ETPIIMVGP GTGIAPFRGF | 929  |
| EJR50635.1             | -EGTYEGVASNYLAQRHNKDEIICFIRTPQ-SNFQLPENP-ETPIIMVGP GTGIAPFRGF | 929  |
| EJR64551.1             | -EGTYEGVASNYLARRHNKDEIICFIRTPQ-SNFQLPENP-ETPIIMVGP GTGIAPFRGF | 929  |
| EJR75620.1             | -EGTYEGVASNYLAQRHNKDEIICFIRTPQ-SNFELPKDP-ETPIIMVGP GTGIAPFRGF | 929  |
| EJR82049.1             | -EGTYEGVASNYLAQRHNKDEIICFIRTPQ-SNFELPKDP-ETPIIMVGP GTGIAPFRGF | 929  |
| EJR83659.1             | -EGTYEGVASNYLAQRHNKDEIICFIRTPQ-SNFELPKDP-ETPIIMVGP GTGIAPFRGF | 929  |
| EJR91135.1             | -----                                                         | 841  |
| EJR97241.1             | -EGTYEGVASNYLAQRHNKDEIICFIRTPQ-SNFELPKDP-ETPIIMVGP GTGIAPFRGF | 929  |
| EJS05852.1             | -EGTYEGVASNYLAQRHNKDEIICFIRTPQ-SNFQLPENP-ETPIIMVGP GTGVAPFRGF | 929  |
| EDX58768.1             | -EGTYEGVASNYLAQRHNKDEIICFIRTPQ-SNFQLPENP-ETPIIMVGP GTGIAPFRGF | 929  |
| AAU24352.1             | -RGHYKGVASNYLAGLEPGDAISCFIREPQ-SGFRLPEDP-ETPVIMVGP GTGIAPYRGF | 924  |
| ABY44122.1             | -EGTYEGVASNYLAQRHNKDEIICFIRTPQ-SNFQLPENP-ETPIIMVGP GTGVAPFRGF | 929  |
| EDW23201.1             | -RGEYAGVASNYLCGLKEGEEVACFLHEAQ-AGFQLPPSS-EVPMIMIGP GTGIAPFRGF | 914  |
| ABV62358.1             | -RGEYAGVASNYLCDLQKGEEVACFLHEAQ-AGFQLPPSS-ETPMIMIGP GTGIAPFRGF | 914  |
| EIF12263.1             | -LGEYRGVASNYLADRGPEGDIVMFVRTPE-TRFRLPEDP-EKPIIMVGP GTGVAPFRGF | 925  |
| EIF14027.1             | -RGEYRGVASNYLAGLQKGDPAVCFIRSPQ-SGFALPENP-KTPLIMVGP GTGIAPFRGF | 917  |
| EHL75405.1             | -EGTYEGVASNYLAQRHNKDEIICFIRTPQ-SNFELPKDP-ETPIIMVGP GTGIAPFRGF | 929  |
| EJD67577.1             | -LGEYRGVASNYLADRGPEGDIVMFVRTPE-TRFRLPEDP-EKPIIMVGP GTGVAPFRGF | 925  |
| EJD68347.1             | -RGEYRGVASNYLAGLQKGDPAVCFIRSPQ-SGFALPENP-KTPLIMVGP GTGIAPFRGF | 917  |
| EFV73436.1             | -RGHYKGVASNYLAGLEPGDAISCFIREPQ-SGFRLPEDP-ETPVIMVGP GTGIAPYRGF | 938  |
| CBY93692.1             | -EGTYEGVASNYLAQRHNKDEIICFIRTPQ-SNFQLPENP-ETPIIMVGP GTGIAPFRGF | 929  |
| AFI27355.1             | -RGEYRGVASNDLAERQAGDDVVMFIRTPQ-SRFQLPKDP-ETPIIMVGP GTGVAPFRGF | 926  |
| AFI29229.1             | -RGEYRGVASTYLAELNTGDAACFIRTPQ-SGFQMPDDP-DTPMIMVGP GTGIAPFRGF  | 918  |
| EIL85422.1             | -RGEYAGVASNYLCGLQEGDEVACFLHEAQ-AGFELPPSP-EIPMIMIGP GTGIAPFRGF | 914  |
| ADV93500.1             | -RGEYRGVASNYLAELNTGDAACFIRTPQ-SGFQMPDEP-ETPMIMVGP GTGIAPFRGF  | 918  |
| ADV95715.1             | -RGEYRGVASNDLAERQAGDDVVMFIRTPQ-SRFQLPKDP-ETPIIMVGP GTGVAPFRGF | 926  |
| BAI84248.1             | -RGEYRGVASNDLAERQAGDDVVMFIRTPQ-SRFQLPEDP-ETPIIMVGP GTGVAPFRGF | 926  |
| EFG90288.1             | -RGEYRGVASNYLAELNTGDAACFIRTPQ-SGFQMPDDP-ETPIIMVGP GTGIAPFRGF  | 918  |
| EFG91781.1             | -RGEYRGVSSSYLAERQAGDDVVMFVRTPE-SRFQLPEDP-ETPIIMVGP GTGVAPFRGF | 926  |
| AEP85668.1             | -RGEYRGVSSNYLAERQAGDDVVMFVRTPE-SRFQLPEDP-ETPIIMVGP GTGVAPFRGF | 926  |
| AEP87558.1             | -RGEYRGVASNYLAELNTGDAACFIRTPQ-SGFQMPDDP-ETPMIMVGP GTGIAPFRGF  | 918  |
| sp O08336.1 CYPB_BACSU | -RGEYRGVASNYLAELNTGDAACFIRTPQ-SGFQMPNDP-ETPMIMVGP GTGIAPFRGF  | 918  |
| sp O08394.1 CYPD_BACSU | -RGEYRGVASNDLAERQAGDDVVMFIRTPQ-SRFQLPKDP-ETPIIMVGP GTGVAPFRGF | 926  |
| AEP89812.1             | -RGEYRGVASNDLAERQAGDDVVMFIRTPQ-SRFQLPEDP-ETPIIMVGP GTGVAPFRGF | 926  |

|            |                                                                 |     |
|------------|-----------------------------------------------------------------|-----|
| AEP91702.1 | -RGEYRGVASNYLAELNTGDAAACFIRTPQ-SGFQMPDEL-ETPMIMVGP GTGIAPFRGF   | 918 |
| EHA31094.1 | -RGEYRGVASNYLAELNTGDAAACFIRTPQ-SGFQMPDEP-ETPMIMVGP GTGIAPFRGF   | 920 |
| ADH07708.1 | -EGTYEGVASNYLAQRHNKDEIICFIRTPQ-SNFELPKNP-ETPIIMVGP GTGIAPFRGF   | 929 |
| EEM28177.1 | -EGTYEGVASNYLAQRHNKDEIICFIRTPQ-SNFELPKDP-ETPIIMVGP GTGIAPFRGF   | 929 |
| AFQ14162.1 | -EGTYEGVASNYLAQRHNKDEIICFIRTPQ-SNFELPKDP-ETPIIMVGP GTGVAPFRGF   | 929 |
| EEM95517.1 | -EGTYEGVASNYLAQRHNKDEIICFIRTPQ-SNFQLPENP-ETPIIMVGP GTGIAPFRGF   | 929 |
| EEN02344.1 | -EGTYEGVASNYLAQRHNKDEIICFIRTPQ-SNFELPKDP-ETPIIMVGP GTGVAPFRGF   | 929 |
| AFU13781.1 | -EGTYEGVASNYLAQRHNKDEIICFIRTPQ-SNFQLPENP-ETPIIMVGP GTGIAPFRGF   | 937 |
| EEM70897.1 | -EGTYEGVASNYLAQRHNKDEIICFIRTPQ-SNFQLPENP-ETPIIMVGP GTGIAPFRGF   | 937 |
| ADY22413.1 | -EGTYEGVASNYLAQRHNKDEIICFIRTPQ-SNFQLPENP-ETPIIMVGP GTGIAPFRGF   | 929 |
| EEM82895.1 | -EGTYEGVASNYLAQRHNKDEIICFIRTPQ-SNFELPKDP-ETPIIMVGP GTGIAPFRGF   | 929 |
| EEM52818.1 | -EGTYEGVASNYLAQRHNKDEIICFIRTPQ-SNFELPKDP-ETPIIMVGP GTGIAPFRGF   | 929 |
| EEM59126.1 | -EGTYEGVASNYLAQRHNKDEIICFIRTPQ-SNFQLPENP-ETPIIMVGP GTGIAPFRGF   | 937 |
| EEM47193.1 | -EGTYEGVASNYLAQRHNKDEIICFIRTPQ-SNFELPKDP-ETPIIMVGP GTGIAPFRGF   | 870 |
| EEM76899.1 | -EGTYEGVASNYLAQRHNKDEIICFIRTPQ-SNFQLPENP-ETPIIMVGP GTGIAPFRGF   | 937 |
| EEM88909.1 | -EGTYEGVASNYLAQRHNKDEIICFIRTPQ-SNFQLPENP-ETPIIMVGP GTGIAPFRGF   | 937 |
| EEM38196.1 | -EGTYEGVASNYLAQRHNKDEIICFIRTPQ-SNFELPKDP-ETPIIMVGP GTGVAPFRGF   | 929 |
| EEM21858.1 | -EGTYEGVASNYLAQRHNKDEIICFIRTPQ-SNFQLPENP-ETPIIMVGP GTGIAPFRGF   | 932 |
| ABK86139.1 | -EGTYEGVASNYLAQRHNKDEIICFIRTPQ-SNFQLPENP-ETPIIMVGP GTGIAPFRGF   | 937 |
| EJQ37805.1 | -EGTYEGVASNYLAQRHNKDEIICFIRTPQ-SNFQLPENP-ETPIIMVGP GTGIAPFRGF   | 929 |
| CCF04242.1 | -LGEYRGVASNYLADRRPEDGIVMFVRTPE-TRFRLPEDP-EKPIIMVGP GTGVAPFRGF   | 925 |
| CCF05972.1 | -RGEYKGVASNYLAGLQNGDSAVCFIRSPQ-SGFALPENT-KTPLIMIGAGTGIAPFRGF    | 917 |
| ABS73124.1 | -LGEYRGVASNYLADRGPEGDGIVMFVRTPE-TRFRLPEDP-EKPIIMVGP GTGVAPFRGF  | 925 |
| ABS74786.1 | -RGEYRGVASNYLAGLQKGD SAVCFIRSPQ-SGFALPENP-KTPLIMVGAGTGIAPFRGF   | 917 |
| EKE46398.1 | -LGEYRGVASNYLADRRPEDGIVMFVRTPE-TRFRLPEDP-EKPIIMVGP GTGVAPFRGF   | 925 |
| EKE48022.1 | -RGEYKGVASNYLAGLQNGDSAVCFIRSPQ-SGFALPENT-KTPLIMIGAGTGIAPFRGF    | 917 |
| CCG48683.1 | -LGEYRGVASNYLADRGPEGDGIVMFVRTPE-TRFRLPEDP-EKPIIMVGP GTGVAPFRGF  | 925 |
| AFJ60789.1 | -LGEYRGVASNYLADRGPEGDGIVMFVRTPE-TRFRLPEDP-EKPIIMVGP GTGVAPFRGF  | 932 |
| AFJ62808.1 | -RGEYRGVASNYLAGLQNGDPAVCFIRSPQ-SGFALPENP-KTPLIMVGAGTGIAPFRGF    | 917 |
| EEK66903.1 | -VGT YEGVASNYLAQRHNKDEIICFIRTPQ-SSFQLPENP-ETPIIMVGP GTGIAPFRGF  | 943 |
| EJQ52935.1 | -EGTYEGVASNYLAQRHNKDEIICFIRTPQ-SNFQLPENP-ETPIIMVGP GTGIAPFRGF   | 929 |
| EJS69574.1 | -VGT YEGVASNYLAQRH SKDEIICFIRTPQ-SNFQLPENP-ETPIIMVGP GTGIAPFRGF | 929 |
| EJV63294.1 | -VGT YEGVASNYLAQRH SKDEIICFIRTPQ-SNFQLPENP-ETPIIMVGP GTGIAPFRGF | 929 |
| EKF35778.1 | -RGEYAGVASNYLCGLQEGEEVACFLHQAQ-GGFELPPSP-EIPMIMIGP GTGIAPFRGF   | 914 |
| EGP08506.1 | -RGIYKGVCSNYMASRRPGDVVHAI VRETK-AGFRLPENP-LTPIIMIGP GTGLAPFRGF  | 947 |
| BAL78328.1 | -RGTYKGVCSNYLANRRAGDAIYATVRETK-AGFRLPDDP-SVPVIMIGP GTGLAPFRGF   | 942 |
| BAC48147.1 | -RGVYKGCISNYLANRRASDAIYATVRETK-AGFRLPDDS-SVPIIMIGP GTGLAPFRGF   | 943 |
| BAL12135.1 | -RGTYKGCISNYLSNRRAGDAIYATVRETK-AGFRLPDES-SVPIIMIGP GTGLAPFRGF   | 943 |

|            |                                                               |     |
|------------|---------------------------------------------------------------|-----|
| CCE00185.1 | -RGLYKGVCSNYLASRREGESVFATVRETK-AGFHLPEDS-RRPIIMIGPGTGLAPFRGF  | 946 |
| EIG57609.1 | -RGTYKGICSNYLANRRAGDVIHATVRETK-AGFRLPDDP-SVPIVMIGPGTGLAPFRGF  | 942 |
| EHR02046.1 | -RGTYKGICSNYLANRRAGDVIHATVRETK-AGFRLPDDP-SVPIVMIGPGTGLAPFRGF  | 942 |
| EJN11211.1 | -----                                                         | 670 |
| CCF15606.1 | -HGEYRGVASNYLADLKPNDPVVIFVRTPE-SHFTLPTNT-ETPLIMIGPGTGVAPFRGF  | 864 |
| CCF12687.1 | -CGVHLGMLDHYLADCHPEEKIIMFISTPE-S-----                         | 898 |
| ABB05850.1 | -NGRHEGVASSYLARLNTGDSLSVAVRPSN-ARFRPPAEP-DLPMILICAGSGIAPFRGF  | 928 |
| EHP43606.1 | -RGMFRGVASTWLQGLAPGAVVAAAIRTPN-PPFAPDPDP-ARAMILVGPGTGIAPFRGF  | 964 |
| ABF10339.1 | -RGQFRGVASTWLQHLPPGARVSASIRTPN-PPFAPDPDP-AAPMLLIGPGTGIAPFRGF  | 931 |
| CAJ95800.1 | -RGLFRGVASTWLQGLAPGAMVAGAIRTPN-PTFAPAADP-ATPMILIGPGTGIAPFRGF  | 962 |
| AEI79937.1 | -RGLFRGVASAWLQGLAPGAMVAGAIRTPN-PAFAPAADP-ATPMILIGPGTGIAPFRGF  | 962 |
| AFD27790.1 | -TGRFRGVASGYLQGAQPGLTRLTAVRPSA-DAFHLPEDS-ATPLILVCAGTGVAPFRGF  | 923 |
| ABC62112.1 | -TGEFKGTCSAYLADLPPGDRFRAVVRKPT-AQFRLPDNP-ETPVIMIGPGTGVAPFRAF  | 936 |
| EAQ27850.1 | -KGTFFKGTCSNYLAELEPGASFNAVREPT-ANFRLPDDP-KVPLIMVGPGTGLAPFRGF  | 937 |
| EIT84377.1 | -DYEYRGVASNDLAQKAKGDEVYAFMPSPN-TAFHYPEDP-ATPLIMVGPGTGLAPFRGF  | 914 |
| CCG43686.1 | -RGEFKGTASNYMANRDIQKDVACFINTPQ-SNFTLPENP-ETPMVWIGPGTGIAPFRGF  | 919 |
| ABX05160.1 | -KGQFYGTGSSYLARLQVGDQIAVSLRQPH-IPFRPPSAN-STPLLMICAGTGLAPFRGF  | 919 |
| BAJ96920.1 | -VALYKGVASNYLATATEGRKVTVTVHPS--ATFHLPGSP-TVPIILVGAGTGIAPLRGF  | 912 |
| GAB96874.1 | -EGTYEGVASTFLANARPGAQIPVTVRPSN-VDFAPPAGL-ATPMIMVCAGTGLAPFRGF  | 974 |
| EFH80345.1 | -HGAYQGVCSNYLKNLEPGQIAYAFVRDTK-STFRLPEDA-STPLIMVGPGTGLAPFRGF  | 940 |
| EFH88481.1 | -HGTFFGVCTSYLRNQHTGDIVYAFVQNTN-GPFHLPEDP-RTPIIMIAAGTGVSPFRGF  | 945 |
| EAW32450.1 | -NGNYLGACSSSTLSDTEVGESIWARIRSVD-SEFLPPQDL-QQPIIMIGPGTGVAPFRGF | 927 |
| EIZ82104.1 | -GRRHRGVASTYLAGLEPGARLSVAVRPSQ-AAFHPPEDP-AVPIVMICAGSGIAPFHGF  | 929 |
| AEV70722.1 | -RGLFKGVASNHAAISPQVPIRARVDQAR-EAFRAGADP-EKNVILVSAGTGVAPFCGF   | 915 |
| EFC41452.1 | -KGFHEGVASNFLASCLPDMQVSVQIRN---SSFKLPNDP-SVPIIMIGAGTGIAPFRGF  | 944 |
| ACV78954.1 | -HGRYYGVTSSYLVTLGAGLRILARVADPG-PQFHPPADP-RTPLVMVCAGTGVAPFRGF  | 963 |
| ACV78964.1 | -DHEFAGVCSNYLASMARNSTIFAFRREPT-IPFRPPADP-TIPMIMIAAGTGLAPFRGF  | 940 |
| ACV81379.1 | -AGRFEGVCSTYLASMDAGSTVFVFTREPT-IPFRPPADP-SVPMIMVAGTGLAPFRGF   | 936 |
| EIZ78677.1 | -ERRHLGVASTHLAGLTEGAAVSVAVRPSQ-AAFHPPEDP-ATPIILVCAGSGIAPFHGF  | 921 |
| EJW15291.1 | -RHEYRGVASNFLADRQPGESIMMFIQPPQ-SNFRLPEDP-STPIIMVGPVGIAPFRGF   | 926 |
| EJW16173.1 | -NGEYRGVASNYLAAREAGDSILMFVRTPE-SRFQPPADP-VTPIIMVGPVTGVAPFRGF  | 926 |
| EHQ58913.1 | -QGEYRGVASNYLAGLQAGESVMMFVRTPE-SGFRLPEDP-GTPMIMVGPVGVAPFRGF   | 924 |
| EHQ59900.1 | -RGEFRGVTSNYLAVRQPGDAIAMFVRTPE-SGFLLPEQA-DTPMIMVGPVTGVAPFRGF  | 923 |
| EHB66924.1 | -RGEYRGIASNYLAELEVGAEVLI FIRSPE-SGFELPEDP-ATPMIMIGPGTGVAPFRGF | 924 |
| AFH60445.1 | -RGEYRGIASNYLAERKPGDPVVVFVRSPE-SGFELPEDP-STPVIMVGPVTGVAPFRGF  | 923 |
| AEI42011.1 | -RGEYRGIASNYLAERKPGDPVVVFVRSPE-SGFELPEDP-STPVIMVGPVTGVAPFRGF  | 923 |
| ADO57681.1 | -QGEYLGIASNYLAQLQPDVVI FVRKPQ-SGFRLPEDP-TVPVIMVGPVTGVAPFRGF   | 922 |
| EGG32133.1 | -KGEYRGIASNYLAELETGAEVL MFIRSPE-SGFALPKDP-ATPMIMIGPGTGVAPFRGF | 926 |

|            |                                                                |      |
|------------|----------------------------------------------------------------|------|
| EGL17662.1 | -RGEYRGVSNYLAERREGDAIVMFVRTPE-SGFGLPDDP-KTPVIMVGP GTGVAPFRGF   | 925  |
| ACX65034.1 | -KGEYRGIASNYLALETGAEVLMFIRSPE-SGFALPEDP-ATPMIMIGP GTGVAPFRGF   | 926  |
| ACT11327.1 | -IGRYKGVASNYLASLKPDDRIAIVVRPSS-PFFHLPDDP-SIPIILIGAGSGIAPFRGF   | 924  |
| AEA28016.1 | -DGRFAGVCSTHLRSCETDSTVFTFVRRPT-IPFRPPENP-HTPMIMVGAGTGMAPFRGF   | 942  |
| EFP68091.1 | -VGTYRGTASTYLMMLRAGAEIAAAVRTPN-PPFAPDADA-SKPMVLIGAGTGIAPFRGF   | 945  |
| EGY61507.1 | -VGTYRGTASTYLMMLRAGAEIAAAVRTPN-PPFAPDADA-SKPMVLIGAGTGIAPFRGF   | 945  |
| EIE85788.1 | -DRHYPGLCSSFLKGAY-DLSIRATLKSK-NTFSLPQDP-STPLIMISAGTGLAPFRGF    | 1064 |
| EIE92534.1 | -NRHYPGLSSSFLKGAH-ELPIRAILKSSK-STFSLPQDL-ATPLIMISAGTGFAPFRGF   | 1066 |
| BAE46296.1 | -----                                                          | 510  |
| BAH31604.1 | -----                                                          | 466  |
| EEN84644.1 | -----                                                          | 466  |
| EEN88978.1 | -----                                                          | 550  |
| ABG96413.1 | -----                                                          | 498  |
| BAH52971.1 | -----                                                          | 465  |
| EHI44575.1 | -----                                                          | 500  |
| EID73168.1 | -----                                                          | 465  |
| EHK83749.1 | -----                                                          | 441  |
| EJI96173.1 | -----                                                          | 465  |
| ABI79384.1 | -----                                                          | 497  |
| CAR47816.1 | -----                                                          | 498  |
| AEK26937.1 | -----                                                          | 473  |
| ABE39056.1 | -RGHYRGVCSTWLAGRSVGDTHATVRATK-AGFRLPDDD-RVPLIMIGP GTGLAPFRGF   | 940  |
| ABD08340.1 | -RGIYRGACSSWLAGRSGD TVQATVRATK-ACFRLPDDD-RVPLIMIGP GTGVAPFRGF  | 937  |
| CAM03474.1 | -RGEFRGAGSRHLSEVRPGD TVLARVQPCR-EDFRV--AP-DEPLIMVAAGTGLAPFRGV  | 925  |
| EJF54063.1 | -QGEYQGLASAYLNKLEEGQLLWLRFTPNL-PNFPAPKS--EDKLILIAAGTGIAPFRAF   | 935  |
| AFC23737.1 | -QGEYQGLASGYLSQLEEGQLLWLRFSNL-PNFPAPKS--EDKLILIAAGTGIAPFRAF    | 923  |
| ADG98903.1 | -----                                                          | 471  |
| EGI54680.1 | -DRLHRGVASTFLARLKDGD TLGVAVRPSQ-TGFHLPADP-LTPVIMVCAGSGIAPFRGF  | 918  |
| AEW97204.1 | ----RRGTGSGHLHRVRPGDVVYARVAPCR-EAFRIAAGD-EVPVVMVAAGTGLAPFRGA   | 932  |
| CAJ88567.1 | -----                                                          | 516  |
| BAC68285.1 | -DGRYRGTCSYIAGLES GDVFYGYVRVPS-PTFAPPADP-ATPLLLIGP GTGIAPLRGF  | 939  |
| BAC75137.1 | -----                                                          | 504  |
| EDY51256.1 | -EGTFLGTGAAYMADLAPGD TVHGRI SPCR-DAFRLPDDP-SVPAILVSAGTGLAPFRAE | 936  |
| EFG07822.1 | -EGTFLGTGAAYMADLAPGD TVHGRI SPCR-DAFRLPDDP-SVPAILVSAGTGLAPFRAE | 968  |
| EHN78335.1 | -----                                                          | 525  |
| CAB66201.1 | -----                                                          | 527  |
| EGG48117.1 | -----                                                          | 517  |
| EFL20831.1 | -EGTFNGIASHYIQTVRAGD TVQARVLPCS-ESFRLPEDP-SVPVILVSAGTGLAPFRGA  | 943  |

|            |                                                                |     |
|------------|----------------------------------------------------------------|-----|
| EFL28515.1 | -TSGFQGTGSGHLNAVRPGDTVLRVQPCR-DAFRIGHAP-DRPVIMVSAGTGLAPFRGT    | 924 |
| AEY93311.1 | -----                                                          | 542 |
| AEY93321.1 | -KGRHRGTGSGHLASLRPGDTVYARVQPCR-EAFRIDH---TAPVVMVAAGTGLAPFRGA   | 934 |
| EFD71156.1 | -----                                                          | 529 |
| CBG67789.1 | -EGMFHGIGSHFLQTVRPGDTLQARVLPCS-EAFRLPDDT-SASVILVSAGTGLAPFRGA   | 939 |
| CBG68112.1 | -----                                                          | 513 |
| EFL10082.1 | -----                                                          | 501 |
| EFF88741.1 | -EGTFHGIASHHLQTVNAGDIVQARVLPCA-DSFRLPDDP-EVPVVLVSAGTGVAPFRGA   | 940 |
| EDY58112.1 | -----                                                          | 506 |
| EFL36674.1 | -----                                                          | 510 |
| EFL36680.1 | -KGVYRGTGSGHLNTVEPGDIVYARVQPCR-EAFRIDAADASAPVVMIAAGTGLAPFRGA   | 974 |
| EFE65335.1 | -----                                                          | 526 |
| EGX54696.1 | -----                                                          | 491 |
| ACZ89135.1 | -VGRFRGISSTYLARLRPGDRVPIAVRRPN-VPFQPPVSN-GTPVIMIAAGTGIAPFRGF   | 921 |
| ABD83817.1 | -RGLYRGVCPYYLASRREGESVFATVRETK-AGFRLPDDP-SVPIIMIGPGTGLAPFRGF   | 944 |
| ADU39615.1 | -NGIFEGVCSNYLARAEEAGDTVHGVIRETTAEGFRLPEDA-MRPLIMVGP GTGLAPFRGF | 941 |
| EJL72014.1 | -SGTFEGVCSNFLARAEEAGDTVHGVIRETTAEGFRLPDDA-ARPLIMVGP GTGLAPFRGF | 941 |

|                        |                                                              |      |
|------------------------|--------------------------------------------------------------|------|
| sp P14779.2 CPXB_PRIM2 | VQARKQLK-EQG-QSLGEAHLYFGCRSPHEDYLYQEELENAQSEGIITLHT-AFSRMPN- | 970  |
| ADF40088.1             | VQARKQLK-EKG-QSLGEAHLYFGCRSPHEDYLYQEELENAQNEGIITLHT-AFSRVPN- | 970  |
| ADE70259.1             | VQARKQLK-EQG-QSLGEAHLYFGCRSPHEDYLYQKELENAQNEGIITLHT-AFSRVPN- | 970  |
| AEN88827.1             | VQARKQLK-EQG-QSLGEAHLYFGCRSPHEDYLYQEELENAQNEGIITLHT-AFSRVPN- | 970  |
| KFN05180.1             | VQARKQLK-EQG-QSLGEAHLYFGCRSPHEDYLYQEELENAQSEGIITLHT-AFSRMPN- | 970  |
| ACZ37122.1             | VQARKQLK-EQG-QSLGEAHLYFGCRSPHEDYLYQKELENAQNEGIITLHT-AFSRVPN- | 970  |
| ADA57055.1             | VQARKQLK-EQG-QSLGEAHLYFGCRSPHEDYLYQEELENAQNEGIITLHT-AFSRVPN- | 970  |
| ADA57058.1             | VQARKQLK-EQG-QSLGEAHLYFGCRSPHEDYLYQKELENAQNEGIITLHT-AFSRVPN- | 970  |
| ADA57059.1             | VQARKQLK-EQG-QSLGEAHLYFGCRSPHEDYLYQEELENAQNEGIITLHT-AFSRVPN- | 970  |
| ADA57061.1             | VQARKQLK-EQG-QSLGEAHLYFGCRSPHEDYLYQKELENAQNEGIITLHT-AFSRVPN- | 970  |
| ADA57062.1             | VQARKQLK-EQG-QSLGEAHLYFGCRSPHEDYLYQEELENAQNEGIITLHT-AFSRVPN- | 970  |
| ADA57068.1             | VQARKQLK-EQG-QSLGEAHLYFGCRSPHEDYLYQKELENAQNEGIITLHT-AFSRVPN- | 970  |
| AAT62301.1             | LQARRVQK-QKG-MKVGEAHLYFGCRHPEKDYLRYTELENDERDGLISLHT-AFSRLEG- | 985  |
| AAM54108.1             | LRARAA----LG-GEPPALLLFGCRGPELDDLAAEEFAALGD--WLEVDR-AYSRHPD-  | 937  |
| EFQ83738.1             | -----                                                        | 505  |
| EFL88452.1             | LQDRAADM-AAG-IDLGPAALFFGCRHPDQDFIYRQELEAWSEQVCDLHT-AFSRA-D-  | 986  |
| BAF89518.1             | IQERHALR-AQG-RATGPVLLFFGCRD-DGDYLYREELEAYRDEGTLSLLAVGFSTRPG- | 1088 |
| CBI43648.1             | IQARAAEK-MSG-NSLGEAHLYFGCRHPEEDDLKDFDHAEKNGLVTVHR-AYSRLDQ-   | 973  |
| AEB22839.1             | LQARAALK-GEG-KELGEAHLYFGCRN-DYDFIYRDELEAYEKDGIVTLHT-AFSRKEG- | 981  |
| EDT22025.1             | LQARRVQK-QKG-MNVGEAHLYFGCRHPEKDYLRYTELENDERDGLISLHT-AFSRLEG- | 985  |
| AFH84458.1             | LQARRVQK-QKG-MNVGEAHLYFGCRHPEKDYLRYTELENDERDGLISLHT-AFSRLEG- | 993  |
| ADP31197.1             | LQARAALK-QEG-KTLGEAHLYFGCRN-DNDFIYRGELEAYEKEGIVTLHT-AFSRKEG- | 981  |
| ACP19384.1             | LQARRVQK-QKG-MNLGQAHLYFGCRHPEKDYLRYTELENDERDGLISLHT-AFSRLEG- | 985  |
| ADL27534.1             | LQARRVQK-QKG-INLGEAHLYFGCRHPEKDYLRYTELENDERDGLISLHT-AFSRLEG- | 985  |
| ACO29732.1             | LQARRVQK-QKG-MNLGEAHLYFGCRHPEKDYLRYTELENDEREGLISLHT-AFSRLEG- | 985  |
| EDX65100.1             | LQARRVQK-QKG-MKVGEAHLYFGCRHPEKDYLRYTELENDEREGLISLHT-AFSRLEG- | 985  |
| EEK61456.1             | LQARRVQK-QKG-INLGEAHLYFGCRHPEKDYLRYTELENDERDGLISLHT-AFSRLEG- | 985  |
| EEL16232.1             | LQARRVQK-QKG-MNVGEAHLYFGCRHPEKDYLRYTELENDERDGLISLHT-AFSRLEG- | 993  |
| EDZ53094.1             | LQARRVQK-QKG-INLGEAHLYFGCRHPEKDYLRYTELENDERDGLISLHT-AFSRLEG- | 985  |
| EEL81346.1             | -----                                                        | 663  |
| EEL87105.1             | IQARRVQK-QKG-INLGEAHLYFGCRHPEQDYLRYTELENDERDGLISLHA-AFSRLEG- | 999  |
| EEL75761.1             | LQARRVQK-QKG-MNLGQAHLYFGCRHPEKDYLRYTELENDERDGLISLHT-AFSRLEG- | 926  |
| ACK88541.1             | LQARRVQK-QKG-MNVGEAHLYFGCRHPEKDYLRYTELENDERDGLISLHT-AFSRLEG- | 985  |
| EJQ05303.1             | LQARRVQK-QKG-MKVGEAHLYFGCRHPEKDYLRYTELENDEREGLISLHT-AFSRLEG- | 985  |
| EEK50040.1             | LQARRVQK-QKG-INLGEAHLYFGCRHPEKDYLRYTELENDERDGLISLHT-AFSRLEG- | 985  |
| AAS42149.1             | LQARRVQK-QKG-MNLGEAHLYFGCRHPEKDYLRYTELENDERDGLISLHT-AFSRLEG- | 985  |
| AAP10153.1             | LQARRVQK-QKG-MNLGQAHLYFGCRHPEKDYLRYTELENDERDGLISLHT-AFSRLEG- | 985  |
| EEK83466.1             | LQARRVQK-QKG-MNLGEAHLYFGCRHPEKDYLRYTELENDEREGLISLHT-AFSRLEG- | 993  |

|            |                                                               |     |
|------------|---------------------------------------------------------------|-----|
| ACK63698.1 | LQARRVQK-QKG-MNLGQAHLYFGCRHPEKDYLRYRTELENDERDGLISLHT-AFSRLEG- | 926 |
| EJS57156.1 | LQARRVQK-QKG-INLGQAHLYFGCRHPEKDYLRYRTELENDERDGLISLHT-AFSRLEG- | 985 |
| EJS56605.1 | IQARRVQK-QKG-INLGEAHLYFGCRHPEQDYLRYRTELENDERDGLISLHA-AFSRLEG- | 985 |
| EJS68951.1 | LQARRVQK-QKG-INLGEAHLYFGCRHPEKDYLRYRTELENDERDGLISLHT-AFSRLEG- | 984 |
| EJQ10567.1 | LQARRVQK-QKG-INLGQAHLYFGCRHPEKDYLRYRTELENDERDGLISLHT-AFSRLEG- | 985 |
| EJQ13433.1 | LQARRVQK-QKG-MNLGQAHLYFGCRHPEKDYLRYRTELENDERDGLISLHT-AFSRLEG- | 985 |
| EJQ20399.1 | LQARRVQK-QKG-INLGEAHLYFGCRHPEKDYLRYRTELENDERDGLISLHT-AFSRLEG- | 985 |
| EJQ30236.1 | LQARRVQK-QKG-INLGEAHLYFGCRHPEKDYLRYRTELENDERDGLISLHT-AFSRLEG- | 985 |
| EJQ51278.1 | LQARRVQK-QKG-INLGEARLYFGCRHPEQDYLRYRTELENDERDGLISLHT-AFSRLEG- | 984 |
| EEL10858.1 | LQARRVQK-QKG-MNLGQAHLYFGCRHPEKDYLRYRTELENDERDGLISLHT-AFSRLEG- | 985 |
| EEL05393.1 | LQARRVQK-QKG-INLGQAHLYFGCRHPEKDYLRYRTELENDERDGLISLHT-AFSRLEG- | 999 |
| EEK94080.1 | LQARRVQK-QKG-MNLGQAHLYFGCRHPEKDYLRYRTELENDERDGLISLHT-AFSRLEG- | 988 |
| EEK99882.1 | LQARRVQK-QKG-MKVGEAHLYFGCRHPEKDYLRYRTELENDEREGLISLHT-AFSRLEG- | 988 |
| EEK55784.1 | LQARRVQK-QKG-MNLGEAHLYFGCRHPEKDYLRYRTELENDEREGLISLHT-AFSRLEG- | 993 |
| ADK05784.1 | LQARRVQK-QKG-MKVGEAHLYFGCRHPEKDYLRYRTELENDEREGLISLHT-AFSRLEG- | 985 |
| AAU17340.1 | LQARRVQK-QKG-MKVGEAHLYFGCRHPEKDYLRYRTELENDERDGLISLHT-AFSRLEG- | 985 |
| EEL64394.1 | LQARRVQK-QKG-INLGEAHLYFGCRHPEKDYLRYRTELENDERDGLISLHT-AFSRLEG- | 985 |
| AEW56259.1 | LQARRVQK-QKG-MKVGEAHLYFGCRHPEKDYLRYRTELENDEREGLISLHT-AFSRLEG- | 985 |
| AFQ11690.1 | LQARRVQK-QKG-MNLGEAHLYFGCRHPEKDYLRYRTELENDERDGLISLHT-AFSRLEG- | 985 |
| EAL16831.1 | LQARRVQK-QKG-MNLGEAHLYFGCRHPEKDYLRYRTELENDEREGLISLHT-AFSRLEG- | 985 |
| ACK94296.1 | LQARRVQK-QKG-INLGQAHLYFGCRHPEKDYLRYRTELENDERDGLISLHT-AFSRLEG- | 985 |
| EDZ58760.1 | LQARRVQK-QKG-MKVGEAHLYFGCRHPEKDYLRYRTELENDEREGLISLHT-AFSRLEG- | 985 |
| EJV84218.1 | VQARRVQK-QKG-INLGQAHLYFGCRHPEKDYLRYRTELENDERDGLISLHT-AFSRLEG- | 985 |
| EJQ69212.1 | LQARRVQK-QKG-INLGQAHLYFGCRHPEKDYLRYRTELENDERDGLISLHT-AFSRLEG- | 985 |
| EJQ80339.1 | LQARRVQK-QKG-INLGQAHLYFGCRHPEKDYLRYRTELENDERDGLISLHT-AFSRLEG- | 985 |
| EJV81602.1 | LQARRVQK-QKG-INLGQAHLYFGCRHPEKDYLRYRTELENDERDGLISLHT-AFSRLEG- | 985 |
| EJQ95474.1 | LQARRVQK-QKG-MKVGEAHLYFGCRHPEKDYLRYRTELENDEREGLISLHT-AFSRLEG- | 985 |
| EEK44229.1 | LQARRVQK-QKG-MKVGEAHLYFGCRHPEKDYLRYRTELENDERDGLISLHT-AFSRLEG- | 993 |
| EEK88560.1 | LQARRVQK-QKG-INLGQAHLYFGCRHPEKDYLRYRTELENDERDGLISLHT-AFSRLEG- | 985 |
| EJR07451.1 | LQARRVQK-QKG-INLGQAHLYFGCRHPEKDYLRYRTELENDERDGLISLHT-AFSRLEG- | 982 |
| EJR16542.1 | LQARRVQK-QKG-MKVGEAHLYFGCRHPEKDYLRYRTELENDERDGLISLHT-AFSRLEG- | 985 |
| BAL18840.1 | LQARRVQK-QKG-MKVGEAHLYFGCRHPEKDYLRYRTELENDEREGLISLHT-AFSRLEG- | 985 |
| EDX69960.1 | LQARRVQK-QKG-MKVGEAHLYFGCRHPEKDYLRYRTELENDERDGLVSLHT-AFSRLEG- | 985 |
| ACM13462.1 | LQARRVQK-QKG-MKVGEAHLYFGCRHPEKDYLRYRTELENDEREGLISLHT-AFSRLEG- | 985 |
| EEK75631.1 | LQARRVQK-QKG-MNLGEAHLYFGCRHPEKDYLRYRTELENDERDGLISLHT-AFSRLDG- | 985 |
| EEL25491.1 | LQARRVQK-QKG-MNLGQAHLYFGCRHPEKDYLRYRTELENDERDGLISLHT-AFSRLEG- | 926 |
| EEL21990.1 | LQARRVQK-QKG-INLGQAHLYFGCRHPEKDYLRYRTELENDERDGLISLHT-AFSRLEG- | 993 |
| EEL33825.1 | LQARRVQK-QKG-INLGQAHLYFGCRHPEKDYLRYRTELENDERDGLISLHT-AFSRLEG- | 993 |

|                        |                                                               |      |
|------------------------|---------------------------------------------------------------|------|
| EEL44933.1             | LQARRVQK-QKG-MNVGEAHLYFGCRHPEKDYLRYRTELENDERDGLISLHT-AFSRLEG- | 993  |
| EEL50167.1             | LQSRRIQK-QQG-IKLGEAHLYFGCRHPEQDYLRYRTELEKDEKDGILSLHT-AFSRLEG- | 1063 |
| EJR22930.1             | LQARRVQK-QKG-MNLGQAHLYFGCRHPEKDYLRYRTELENDERDGLISLHT-AFSRLEG- | 985  |
| EJP91231.1             | LQARRVQK-QKG-INLGQAHLYFGCRHPEKDYLRYRTELENDERDGLISLHT-AFSRLEG- | 985  |
| EJR37623.1             | LQARRVQK-QKG-MNLGQAHLYFGCRHPEKDYLRYRTELENDERDGLISLHT-AFSRLEG- | 985  |
| EJR50635.1             | LQARRVQK-QKG-MKVGEAHLYFGCRHPEKDYLRYRTELENDERDGLISLHT-AFSRLEG- | 985  |
| EJR64551.1             | LQARRVQK-QKG-INLGQAHLYFGCRHPEKDYLRYRTELENDERDGLISLHT-AFSRLEG- | 985  |
| EJR75620.1             | LQARRVQK-QKG-MNLGQAHLYFGCRHPEKDYLRYRTELENDERDGLISLHT-AFSRLEG- | 985  |
| EJR82049.1             | LQARRVQK-QKG-INLGEAHLYFGCRHPEKDYLRYRTELENDERDGLISLHT-AFSRLEG- | 985  |
| EJR83659.1             | LQARRVQK-QKG-MNLGQAHLYFGCRHPEKDYLRYRTELENDERDGLISLHT-AFSRLEG- | 985  |
| EJR91135.1             | -----                                                         | 841  |
| EJR97241.1             | LQARRVQK-KKG-MNLGQAHLYFGCRHPEKDYLRYRTELENDERDGLISLHT-AFSRLEG- | 985  |
| EJS05852.1             | LQARRVQK-QKG-INLGQAHLYFGCRHPEKDYLRYRTELENDERDGLISLHT-AFSRLEG- | 985  |
| EDX58768.1             | LQARRVQK-QKG-MNVGEAHLYFGCHHPEKDYLRYRTELENDERDGLISLHT-AFSRLEG- | 985  |
| AAU24352.1             | LQARRIQR-DAG-VKLGEAHLYFGCRRPNEDFLYRDELEQAQKDGIVHLHT-AFSRLEG-  | 980  |
| ABY44122.1             | LQARRVQK-QKG-INLGQAHLYFGCRHPEKDYLRYRTELENDERDGLISLHT-AFSRLEG- | 985  |
| EDW23201.1             | VQAREVWQ-KEG-KPLGEAHLYFGCRHPHEDDLYFEEMQLAAQKGVVHIHR-AYSRHK--  | 969  |
| ABV62358.1             | VQAREVWQ-KEG-KRLGEAHLYFGCRHPHEDDLYFEEMQLAAQKGVVHIRR-AYSRHK--  | 969  |
| EIF12263.1             | LQARAALK-KEG-KELGEAHLYFGCRN-DHDFIYRDELEAYEKDGIVTLHT-AFSRKEG-  | 980  |
| EIF14027.1             | IQARAAEK-MSG-NSLGEAHLYFGCRHPEQDDLYKDEFDHAENGLVTVHR-AYSRLDQ-   | 973  |
| EHL75405.1             | LQARRVQK-QKG-INLGEAHLYFGCRHPEKDYLRYRTELENDERDGLISLHT-AFSRLEG- | 985  |
| EJD67577.1             | LQARAALK-KEG-KELGEAHLYFGCRN-DHDFIYRDELEAYEKDGIVTLHT-AFSRKEG-  | 980  |
| EJD68347.1             | IQARAAEK-MSG-NSLGEAHLYFGCRHPEEDDLYKDEFDHAENGLVTVHR-AYSRLDQ-   | 973  |
| EFV73436.1             | LQARRIQR-DAG-VKLGEAHLYFGCRRPNEDFLYRDELEQAQKDGIVHLHT-AFSRLEG-  | 994  |
| CBY93692.1             | LQARRVQK-QKG-MKVGEAHLYFGCRHPEKDYLRYRTELENDEREGLISLHT-AFSRLEG- | 985  |
| AFI27355.1             | LQARDVLK-REG-KTLGEAHLYFGCRN-DRDFIYRDELEQFEKDGIVTVHT-AFSRKEG-  | 981  |
| AFI29229.1             | IQARSVLN-KEG-STLGEALLYFGCRRPDHDDLYREELDQAEQGLVTIRR-CYSRVEN-   | 974  |
| EIL85422.1             | IQAREAWQ-NEG-KPLGEAHLYFGCRHPHEDDLYDEMQLAEQKGVVTIHR-AYSRYE--   | 969  |
| ADV93500.1             | IQARSVLK-KEG-STLGEALLYFGCRRPDHDDLYREELDQAEQGLVTIRR-CYSRVEN-   | 974  |
| ADV95715.1             | LQARDVLK-REG-KTLGEAHLYFGCRN-DRDFIYRDELEQFEKDGIVTVHT-AFSRKEG-  | 981  |
| BAI84248.1             | LQAREVLK-REG-KTLGEAHLYFGCRN-DRDFIYRDELEQFEKDGIVTVHT-AFSRKEG-  | 981  |
| EFG90288.1             | IQARSVLK-KEG-SALGEALLYFGCRHPDHHDLRYEELDQAEQDGLVTIRR-CYSRVEN-  | 974  |
| EFG91781.1             | LQARAALK-REG-KALGEAHLYFGCRN-DHDFIYRDELEQFEKDGIVTVHT-AFSRKEG-  | 981  |
| AEP85668.1             | LQARAALK-REG-KALGEAHLYFGCRN-DHDFIYRDELEQFEKDGIVTVHT-AFSRKEG-  | 981  |
| AEP87558.1             | IQARSVLK-KEG-SALGEALLYFGCRRPDHDDLYREELDQAEQDGLVTIRR-CYSRVEN-  | 974  |
| sp 008336.1 CYPB_BACSU | IQARSVLK-KEG-STLGEALLYFGCRRPDHDDLYREELDQAEQDGLVTIRR-CYSRVEN-  | 974  |
| sp 008394.1 CYPD_BACSU | LQARDVLK-REG-KTLGEAHLYFGCRN-DRDFIYRDELEQFEKDGIVTVHT-AFSRKEG-  | 981  |
| AEP89812.1             | LQAREVLK-REG-KKLGEAHLYFGCRN-DRDFIYRDELEQFKKDGIVTVHT-AFSRKEG-  | 981  |

|            |                                                              |      |
|------------|--------------------------------------------------------------|------|
| AEP91702.1 | IQARSVLK-KEG-STLGEALLYFGCRRPDHDDLRYEELDQAEQDGLVTIRR-CYSRVEN- | 974  |
| EHA31094.1 | IQARSVLK-KEG-STLGEALLYFGCRRPDHDDLRYEELDQAEQEGLVTIRR-CYSRVEN- | 976  |
| ADH07708.1 | LQARRVQK-QKG-MNLGQAHLYFGCRHPEKDYLRYTELENDERDGLISLHT-AFSRLEG- | 985  |
| EEM28177.1 | LQARRVQK-QKG-INLGQAHLYFGCRHPEKDYLRYTELENDERDGLISLHT-AFSRLEG- | 985  |
| AFQ14162.1 | LQARRVQK-QKG-INLGQAHLYFGCRHPEKDYLRYTELENDERDGLISLHT-AFSRLEG- | 985  |
| EEM95517.1 | LQARRVQK-QKG-MNLGQAHLYFGCRHPEKDYLRYTELENDERDGLISLHT-AFSRLEG- | 985  |
| EEN02344.1 | LQARRVQK-QKG-INLGQAHLYFGCRHPEKDYLRYTELENDERDGLISLHT-AFSRLEG- | 985  |
| AFU13781.1 | LQARRVQK-QKG-INLGQAHLYFGCRHPEKDYLRYTELENDERDGLISLHT-AFSRLEG- | 993  |
| EEM70897.1 | LQARRVQK-QKG-MNVGEAHLYFGCRHPEKDYLRYTELENDERDGLISLHT-AFSRLEG- | 993  |
| ADY22413.1 | LQARRVQK-QKG-MNLGEAHLYFGCRHPEKDYLRYTELENDEREGLISLHT-AFSRLEG- | 985  |
| EEM82895.1 | LQARRVQK-QKG-MNLGQAHLYFGCRHPEKDYLRYTELENDERDGLISLHT-AFSRLEG- | 985  |
| EEM52818.1 | LQARRVQK-QKG-INLGEAHLYFGCRHPEKDYLRYTELENDERDGLISLHT-AFSRLEG- | 985  |
| EEM59126.1 | LQARRVQK-QKG-MNVGEAHLYFGCRHPEKDYLRYTELENDERDGLISLHT-AFSRLEG- | 993  |
| EEM47193.1 | LQARRVQK-QKG-MNLGQAHLYFGCRHPEKDYLRYTELENDERDGLISLHT-AFSRLEG- | 926  |
| EEM76899.1 | LQARRVQK-QKG-MNVGEAHLYFGCRHPEKDYLRYTELENDERDGLISLHT-AFSRLEG- | 993  |
| EEM88909.1 | LQARRVQK-QKG-MKVGEAHLYFGCRHPEKDYLRYTELENDEREGLISLHT-AFSRLEG- | 993  |
| EEM38196.1 | LQARRVQK-QKG-INLGQAHLYFGCRHPEKDYLRYTELENDERDGLISLHT-AFSRLEG- | 985  |
| EEM21858.1 | LQARRVQK-QKG-MKVGEAHLYFGCRHPEKDYLRYTELENDERDGLISLHT-AFSRLEG- | 988  |
| ABK86139.1 | LQARRVQK-QKG-MKVGEAHLYFGCRHPEKDYLRYTELENDEREGLISLHT-AFSRLEG- | 993  |
| EJQ37805.1 | LQARRVQK-QKG-INLGQAHLYFGCRHPEKDYLRYTELENDERDGLISLHT-AFSRLEG- | 985  |
| CCF04242.1 | LQARAALK-KEG-KELGEAHLYFGCRN-DHDFIYRDELEAYEKDGIVTLHT-AFSRKEG- | 980  |
| CCF05972.1 | IQARAAEK-MSG-NSLGEAHLYFGCRHPEEDDLKDEFDHAEKNGLVTVHR-AYSRLDQ-  | 973  |
| ABS73124.1 | LQARAALK-KEG-KELGEAHLYFGCRN-DHDFIYRDELEAYEKDGIVTLHT-AFSRKEG- | 980  |
| ABS74786.1 | IQARAAEK-MSG-NSLGEAHLYFGCRHPEQDDLKDEFDHAEKNGLVTVHR-AYSRLDQ-  | 973  |
| EKE46398.1 | LQARAALK-KEG-KELGEAHLYFGCRN-DHDFIYRDELEAYEKDGIVTLHT-AFSRKEG- | 980  |
| EKE48022.1 | IQARAAEK-MSG-NSLGEAHLYFGCRHPEEDDLKDEFDHAEKNGLVTVHR-AYSRLDQ-  | 973  |
| CCG48683.1 | LQARAALK-KEG-KELGEAHLYFGCRN-DHDFIYRDELEAYEKDGIVTLHT-AFSRKEG- | 980  |
| AFJ60789.1 | LQARAALK-KEG-KELGEAHLYFGCRN-DHDFIYRDELEAYEKDGIVTLHT-AFSRKEG- | 987  |
| AFJ62808.1 | IQARAAEK-MSG-NSLGEAHLYFGCRHPEEDDLKDEFDHAEKNGLVTVHR-AYSRLDQ-  | 973  |
| EEK66903.1 | LQARRVQK-QKG-MNLGQAHLYFGCRHPEKDYLRYTELENDERDGLISLHT-AFSRLEG- | 999  |
| EJQ52935.1 | LQARRVQK-QKG-MNLGQAHLYFGCRHPEKDYLRYTELENDERDGLISLHT-AFSRLEG- | 985  |
| EJS69574.1 | LQARRVQK-QKG-INLGQAHLYFGCRHPEKDYLRYTELENDERDGLISLHT-AFSRLEG- | 985  |
| EJV63294.1 | LQARRVQK-QKG-INLGQAHLYFGCRHPEKDYLRYTELENDERDGLISLHT-AFSRLEG- | 985  |
| EKF35778.1 | IQARGEWH-NEG-KQLGEAHLYFGCRHPHEDDLYYDEMQLAAQKGLVTIHR-AYSRYE-- | 969  |
| EGP08506.1 | LQERAAMK-EKG-QTLGPSMLFFGCRHPDQDFLYADELKGAEQGITDLHV-AFSRA-D-  | 1002 |
| BAL78328.1 | LQERAARK-AGK-AALGPAMLFFGCRHPDQDFLYKDELTAALASGITELFT-AFSRA-D- | 997  |
| BAC48147.1 | LQERAARK-AGK-ASLGPAMLFFGCRHPDQDFLYADELKALAASGVTELFT-AFSRA-D- | 998  |
| BAL12135.1 | LQERAARK-AGK-AALGPAMLFFGCRHPDQDFLYAEELKGLAASGITELFT-AFSRA-D- | 998  |

|            |                                                                |      |
|------------|----------------------------------------------------------------|------|
| CCE00185.1 | LQERAAQK-AAG-RSLGPAMLFFGCRHPEQDYLYADELKAFADSGICELFT-AFSRG-D-   | 1001 |
| EIG57609.1 | LQERAERK-AKG-AALGPAMLFFGCRHPDQDFLYANELKALAASGITELFT-AFSRA-E-   | 997  |
| EHR02046.1 | LQERAARK-AKG-AALGPAMLFFGCRHPDQDFLYADELKALAASGITELFT-AFSRV-E-   | 997  |
| EJN11211.1 | -----                                                          | 670  |
| CCF15606.1 | LQARKHYQ-QQG-KQLGEAHLFYFGARHPQQDYLYQEEFAQYEKEGIVTIHT-AFSRVEG-  | 920  |
| CCF12687.1 | -----                                                          | 898  |
| ABB05850.1 | LQERALQK-QRG-ENVGTSLLFFGIDDPDVFDFLYRDELDEWARCGVVEVMP-AYSNRPE-  | 984  |
| EHP43606.1 | LEERAAQK-AAG-QAVAASQFYYGCRHPQHDWLYRDDVARWQSEGVVQAHA-AYSTSAA-   | 1020 |
| ABF10339.1 | LEERALRK-MAG-NAVTPAQLYFGCRHPQHDWLYREDIERWAGQGVVEVHP-AYSVVP--   | 986  |
| CAJ95800.1 | LEERAAQQ-AAG-QPVAPVQLYYGCRHPAHDWLYRNNVERWQAQGVVQVHL-ACSVVD--   | 1017 |
| AEI79937.1 | LEERAAQQ-AAG-QPVAPVQLYYGCRHPAHDWLYRDDVARWQAQGVVQVHL-ACSVVD--   | 1017 |
| AFD27790.1 | LEERALRQ-AGG-ETVGEALLFFGCDHPDLDFLYRDELLAWQERGVVSVRP-AFSQQPE-   | 979  |
| ABC62112.1 | LQRRDHLQ-EDG-AVLGEAMLFFGCRHPDIDYLYREELDDYDQRGVATVHA-AFSRH-D-   | 991  |
| EAQ27850.1 | LQERDALA-SSG-EELGPARLYFGCRTPEDEDFLYRDELEDDYDKRGIVTLRT-AFSRV-D- | 992  |
| EIT84377.1 | LQHRAFLQ-QQG-IALGPAHLFYGCRN-EEDYLYREELAAAYNEQQLVTLHT-VFSRTGN-  | 969  |
| CCG43686.1 | IQARENLL-EEG-HRLGEAHLFYGCRHPEKDFLYKNELEKAADKGLITLHT-AFSRIEG-   | 975  |
| ABX05160.1 | IQERVARQ-GQG-EALGPNALFFGCDHPEVDLLYHEQIQAWQKAGVLEFFP-AFYRQPV-   | 975  |
| BAJ96920.1 | IQERAIQI-QNG-RTVGDTHLLFFGCPGPDGFLYKEELDAWEKIGAVKVRT-AFFRVQG-   | 968  |
| GAB96874.1 | IQDRALRAQSEG-VTPAPALLFFGCDGPDVDYLYRDELAWEADGIVQVRP-AFSAAPQD    | 1032 |
| EFH80345.1 | LQERAAQR-EAG-QSVGPSLLFFGCRHSRQDFLYEDELKTFEQQGVTELHT-AFSRE-Q-   | 995  |
| EFH88481.1 | LQERGRQK-QAG-KEIGPALLFFGCRDP-QHLLYPEEIKRGEDNGIVKVFA-VYSRVAS-   | 1000 |
| EAW32450.1 | IQDRMLHL-KQG-KTLGEAILFFGCRHPDVDEIYGDEFQAEQAAGAVSCIK-AYSRAPA-   | 983  |
| EIZ82104.1 | LQERAIQK-ANG-RPVGPAALLFFGATHPDVDYLYRDELAWEAQGVVSVRT-AFSQAPD-   | 985  |
| AEV70722.1 | LGDRLAAR-EAD-EPYSTALCFFGVRDPVDYIFREQFERGEEELGIVRMRP-AFSRAPQ-   | 971  |
| EFC41452.1 | VQERACLI-KEG-KTLGKALLFQGCRNPEQDYLYKKELEEWSQLGAVELRP-VFSRMGS-   | 1000 |
| ACV78954.1 | LQERAAER-AIG-RPVGPTLLFRGCRHPDLDRYLYGRELDTWAGQGWLDDLYE-AYSRPDG- | 1019 |
| ACV78964.1 | LQERAVQK-ERG-EPVAPSLFFFGCRYPD-QFLYADELADSEKTADVRVYT-AFSRQPV-   | 995  |
| ACV81379.1 | LQERAAQG-ADG-AALAPSLFFFGCRTRD-DRLYEQELADFATSASVQTYT-AFSREPG-   | 991  |
| EIZ78677.1 | LQERAIQR-SGG-RNVGEALLFFGIDHPDVDYLYRDELKQWQAQGVVDVRP-AFSQAPE-   | 977  |
| EJW15291.1 | IQARQAMK-EQG-ISLGSAYLYFGCRD-ATDHIYEEELKQYQLEGIVTVHT-AFSRIEG-   | 981  |
| EJW16173.1 | LQARQALQ-QEG-KSLGQAILYYGCRN-EADYLYREELERYVQDGIVIVHT-AFSRKEG-   | 981  |
| EHQ58913.1 | LQARRELK-RKG-VQLGSAHLFYFGCRD-EADHIYLEELEQFQQEGLVTVHT-AFSRLPG-  | 979  |
| EHQ59900.1 | LQARRALK-QEG-KTLGEAHLFYGCRNPEHDYLYREELEQYERDGFVRLHT-AFSRVAN-   | 979  |
| EHB66924.1 | IQARQALR-DAG-QELGAAHLFYGCRNPEHDYLYRDELEQAERAGLVTLHS-AFSRVDG-   | 980  |
| AFH60445.1 | LQARRVLK-AQG-AELGEAHLFYGCRNPQHDYLYREELEQAERDGLVVLHT-ACSRVDG-   | 979  |
| AEI42011.1 | LQARRVLQ-AQG-AELGEAHLFYGCRNPQHDYLYREELEQAERDGLVVLHT-ACSRVDG-   | 979  |
| ADO57681.1 | LQTRHVLK-ERG-EQLGEAHLFYGCRDPKLDYLYKQELQWEQEGIVTVHT-AFSRLPG-    | 978  |
| EGG32133.1 | IQARQALR-EAG-QELGAAHLFYGCRNPEQDFLYREEFERAEQEGLVTLHT-AFSRVSG-   | 982  |

|            |                                                                |      |
|------------|----------------------------------------------------------------|------|
| EGL17662.1 | LQARSALR-REG-TELGEAHLYFGCRC-ESDYIYREELERYEREGLVKLHT-AYSREEG-   | 980  |
| ACX65034.1 | IQARQALR-EAG-QELGAAHLYFGCRNPEQDFLYREEFERAEQEGLVTLHT-AFSRVSG-   | 982  |
| ACT11327.1 | LQERALQQ-AAG-VRVGPALLFFGTGHPDVDYLYRDELAWEKSHIVTVLP-AFSHQPD-    | 980  |
| AEA28016.1 | LQERAGLR-RRG-VPVGESLLFFGCRTPEQDFLYSDELRAFERDGIIVRLCM-AFSRVA--  | 997  |
| EFP68091.1 | LEERAAQQ-AAG-EAVATSLLCFGCRHPDHDFLYRDTLRAWEDAGVVRVFP-AYSCVAE-   | 1001 |
| EGY61507.1 | LEERAAQQ-AAG-EAVATSLLCFGCRHPDHDFLYRDTLRAWEDAGVVRVFP-AYSCVAE-   | 1001 |
| EIE85788.1 | LQERKAQIDILGQDKVASSVLFVFGCRRADQDYIYEEELEAYSKNGVLSKLYAVFSRNLE-  | 1123 |
| EIE92534.1 | LQERKAQIDNLGADKVAPSVLFFGCRRADQDYIYQEELETYAKNGVLSDLHVAFSRSDD-   | 1125 |
| BAE46296.1 | -----                                                          | 510  |
| BAH31604.1 | -----                                                          | 466  |
| EEN84644.1 | -----                                                          | 466  |
| EEN88978.1 | -----                                                          | 550  |
| ABG96413.1 | -----                                                          | 498  |
| BAH52971.1 | -----                                                          | 465  |
| EHI44575.1 | -----                                                          | 500  |
| EID73168.1 | -----                                                          | 465  |
| EHK83749.1 | -----                                                          | 441  |
| EJI96173.1 | -----                                                          | 465  |
| ABI79384.1 | -----                                                          | 497  |
| CAR47816.1 | -----                                                          | 498  |
| AEK26937.1 | -----                                                          | 473  |
| ABE39056.1 | LQERAARQ-QNG-ATLGPALLFFGCRHPAQDYLYADELQGFAAEGVVELHT-AFSRG-E-   | 995  |
| ABD08340.1 | LQERSARK-VGG-ATLGPALLFFGCRHPAQDYLYADELQGFAADGIVELHA-AFSRG-D-   | 992  |
| CAM03474.1 | IADRRERV-ANG-ARQAPALCYFGCDAPDADYLHSAELRAAESAGAVAMRP-AFNEAPV-   | 981  |
| EJF54063.1 | MQERSLEK-----TPAKAVFFYGCRAKEVDQLYAKEFAKWEKEGWLDLRP-VYSKTPE-    | 987  |
| AFC23737.1 | MQERSLEK-----TPEKAVFFYGCRAKEVDQLYAEEFAQWEKEGWLDLRP-VYSKAPE-    | 975  |
| ADG98903.1 | -----                                                          | 471  |
| EGI54680.1 | LQERAVRK-AAG-ERLGPALLFFGVDPDTDFLYREELEHWQDTGVVSLRM-AFSVTGQ-    | 974  |
| AEW97204.1 | VADRVLR-SAG-RELAPALLYFGCDHPEVDLHAAELRGAEAAAGAVSLRP-AFSAAPD-    | 988  |
| CAJ88567.1 | -----                                                          | 516  |
| BAC68285.1 | LEERAHQH-AHG-TQVGLSQVFGCRHPEHDYFYRQEMQDWEQAGIAQVHT-AFSAVTG-    | 995  |
| BAC75137.1 | -----                                                          | 504  |
| EDY51256.1 | IADRAAL--PAG-TDPAPLVSYFGCDHPDLDYLHRAELEAAEATGAVSLRP-AFSRSPV-   | 991  |
| EFG07822.1 | IADRAAL--PAG-TDPAPLVSYFGCDHPDLDYLHRAELEAAEATGAVSLRP-AFSRSPV-   | 1023 |
| EHN78335.1 | -----                                                          | 525  |
| CAB66201.1 | -----                                                          | 527  |
| EGG48117.1 | -----                                                          | 517  |
| EFL20831.1 | VLDRKHA--G-----ATGTMLCYFGCDHPDLDYLHHEEFAPAEAAAGAVSMRP-TFACAPE- | 995  |

|            |                                                              |     |
|------------|--------------------------------------------------------------|-----|
| EFL28515.1 | IADRRALV-ESG-TPLAPALCYFGCDAPDADYLHGEELRAAEAVGAVSMRP-AFSQAPV- | 980 |
| AEY93311.1 | -----                                                        | 542 |
| AEY93321.1 | VADRLAAR-RTG-ARLPAGLLYFGCDAPDVDYLHAEELRAAERAGAVSLRP-AFSAAPV- | 990 |
| EFD71156.1 | -----                                                        | 529 |
| CBG67789.1 | VLDRRHA--G----STGTLLCYFGCDHPDVDYLHRAEFEAAEAAGAVSMRP-AFSCAPE- | 991 |
| CBG68112.1 | -----                                                        | 513 |
| EFL10082.1 | -----                                                        | 501 |
| EFF88741.1 | VLDRLHH--G----STGTLLCYFGCDHPDVDYLHREEFEADAAGAVSMRP-TFMHAPE-  | 992 |
| EDY58112.1 | -----                                                        | 506 |
| EFL36674.1 | -----                                                        | 510 |
| EFL36680.1 | IADRTAAL-ATG-ARTGPGPLL-----                                  | 994 |
| EFE65335.1 | -----                                                        | 526 |
| EGX54696.1 | -----                                                        | 491 |
| ACZ89135.1 | VQERALRK-AAG-EPLGETLLFFGCDHPDVDLYRDELARWEADGAVRVLP-AFTHQPE-  | 977 |
| ABD83817.1 | LQERAARK-AGG-ATLGPAMLFFGCRHPEQDLYADELKAFADGITELV-AFSRS-E-    | 999 |
| ADU39615.1 | LQERAAQV-ERG-EALGEAMLFFGCRHPEQDFIYAEELQGWSHRGLMKLHT-AFSRS-G- | 996 |
| EJL72014.1 | LQERAAQI-EGG-NPLGEALLFFGCRHPEQDFIYADELQAWAHRGVMKLHT-AFSRA-G- | 996 |

```

sp|P14779.2|CPXB_PRIM2      ---QPKTYVQHVMEQDGKKLIELLDQ----G---AHFYICGDGSQMAPAVEATLMKSYAD 1020
ADF40088.1                  ---QPKTYVQHVMEQDGKKLIELLDQ----G---AHFYICGDGSQMAPDVEATLMKSYAG 1020
ADE70259.1                  ---QPKTYVQHVMEQDGKKLIELLDQ----G---AHFYICGDGSQMAPDVEATLMKSYAE 1020
AEN88827.1                  ---QPKTYVQHVMEQDGTKLIELLDQ----G---AHFYICGDGSQMAPDVEATLIKSYAD 1020
KFN05180.1                  ---QPKTYVQHVMEQDGKKLIELLDQ----G---AHFYICGDGSQMAPAVEATLMKSYAD 1020
ACZ37122.1                  ---QPKTYVQHVMEQDGKKLIELLDQ----G---AHFYICGDGSQMAPDVEATLMKSYAE 1020
ADA57055.1                  ---QPKTYVQHVMERDGGKKLIELLDQ----G---AHFYICGDGSQMAPDVEATLMKSYAD 1020
ADA57058.1                  ---EPKTYVQHVMEQDGKKLIELLDQ----G---AHFYICGDGSQMAPDVEATLMKSYAE 1020
ADA57059.1                  ---QPKTYVQHVMERDGGKKLIELLDQ----G---AHFYICGDGSQMAPDVEATLMKSYAD 1020
ADA57061.1                  ---QPKTYVQHVMEQDGKKLIELLDQ----G---AHFYICGDGSQMAPDVEATLMKSYAE 1020
ADA57062.1                  ---QPKTYVQHVMEQDGKKLIELLDQ----G---AHFYICGDGSQMAPDVEATLMKSYAD 1020
ADA57068.1                  ---QPKTYVQHVMEQDGKKLIELLDQ----G---AHFYICGDGSQMAPDVEATLMKSYAE 1020
AAT62301.1                  ---HPKTYVQHVVIKEDRIHLISLLDN----G---AHLYICGDGSKMAPDVEDTLCQAYQE 1035
AAM54108.1                  ---GEVRHVQHRLWQRRDRVRELVDA----G---ARVYLCGDATRVGPAVEEVLGRIGP- 986
EFQ83738.1                  ----- 505
EFL88452.1                  ---KERVYVQDVLRRQQRASIWPMIEA----G---AKIYVCGDGGHMEPDVRRALTRIYME 1036
BAF89518.1                  ---TPRTYVQDLLRTHGDAVREQVAA----G---ASILICGNARTMAPDVHAAFLELLGA 1138
CBI43648.1                  ---DCKVYVQDVLLREAAQI IALLDQ----G---GHLYICGDGSKMAPAVENVLLQAYEK 1023
AEB22839.1                  ---VPKTYVQHLMAEDAETLISILDR----G---GHLYVCGDGSKMAPDVEETLQKAYQS 1031
EDT22025.1                  ---QAKTYVQHVVIKEDRIHLISLLDN----G---AHLYICGDGSKMAPDVEDTLCQAYQE 1035
AFH84458.1                  ---QAKTYVQHVVIKEDRIHLISLLDN----G---AHLYICGDGSKMAPDVEDTLCQAYQE 1043
ADP31197.1                  ---IPKTYVQHLMAENAEELISILDQ----G---GHLYVCGDGSKMAPDVEATLQKAYQS 1031
ACP19384.1                  ---HPKTYVQHLLIKQDRSNLISLLDN----G---AHLYICGDGSKMAPDVEDTLCQAYQE 1035
ADL27534.1                  ---HPKTYVQHLLIKQDRINLISLLDN----G---AHLYICGDGSKMAPDVEDTLCQAYQ- 1034
ACO29732.1                  ---HPKTYVQHVVIKEDRIHLISLLDN----G---AHLYICGDGSKMAPDVEDTLCQAYQE 1035
EDX65100.1                  ---HPKTYVQHVVIKEDRIHLISLLDN----G---AHLYICGDGSKMAPDVEDTLCQAYQE 1035
EEK61456.1                  ---HPKTYVQHLLIKQDRINLISLLDN----G---AHLYICGDGSKMAPDVEDTLCQAYQE 1035
EEL16232.1                  ---HPKTYVQHVVIKEDRIHLISLLDN----G---AHLYICGDGSKMAPDVEDTLCQAYQE 1043
EDZ53094.1                  ---HPKTYVQHLLIKQDRINLISLLDN----G---AHLYICGDGSKMAPDVEDTLCQAYQE 1035
EEL81346.1                  ----- 663
EEL87105.1                  ---NPKTYVQHLLIKQDRINLISLLDN----G---AHLYICGDGSKMAPDVEDTLCQAYQE 1049
EEL75761.1                  ---HPKTYVQHLLIKQDRINLISLLDN----G---AHLYICGDGSKMAPDVEDTLCQAYQE 976
ACK88541.1                  ---QAKTYVQHVVIKEDRIHLISLLDN----G---AHLYICGDGSKMAPDVEDTLCQAYQE 1035
EJQ05303.1                  ---HPKTYVQHVVIKEDRIHLISLLDN----G---AHLYICGDGSKMAPDVEDTLCQAYQE 1035
EEK50040.1                  ---HPKTYVQHLLIKQDRINLISLLDN----G---AHLYICGDGSKMAPDVEDTLCQAYQE 1035
AAS42149.1                  ---HPKTYVQHVVIKEDRMNLISLLDN----G---AHLYICGDGSKMAPDVEDTLCQAYQE 1035
AAP10153.1                  ---HPKTYVQHLLIKQDRINLISLLDN----G---AHLYICGDGSKMAPDVEDTLCQAYQE 1035
EEK83466.1                  ---HPKTYVQHVVIKEDRIHLISLLDN----G---AHLYICGDGSKMAPDVEDTLCQAYQE 1043

```

ACK63698.1 ---HPKTYVQHHLIKQDRINLISLLDN----G---AHLYICGDGSKMAPDVEDTLCQAYQE 976  
EJS57156.1 ---HPKTYVQHHLIKQDRINLISLLDN----G---AHLYICGDGSKMAPDVEDTLCQAYQE 1035  
EJS56605.1 ---NPKTYVQHHLIKQDRINLISLLDN----G---AHLYICGDGSKMAPDVEDTLCQAYQE 1035  
EJS68951.1 ---HPKTYVQHLMQDGDGLISLLDN----S---AHLYICGDGSRMAPDVENTLTCQAYQR 1034  
EJQ10567.1 ---HPKTYVQHHLIKQDRINLISLLDN----G---AHLYICGDGSKMAPDVEDTLCQAYQE 1035  
EJQ13433.1 ---YPKTYVQHHLIKQDRNDLISLLDN----G---AHLYICGDGSKMAPDVEDTLCQAYQE 1035  
EJQ20399.1 ---HPKTYVQHHLIKQDRINLISLLDN----G---AHLYICGDGSKMAPDVEDTLCQAYQE 1035  
EJQ30236.1 ---HPKTYVQHHLIKQDRINLISLLDN----G---AHLYICGDGSKMAPDVEDTLCQAYQE 1035  
EJQ51278.1 ---HPKTYVQHLMQDGDGLISLLDN----S---AHLYICGDGSRMAPDVEDTLCQAYQR 1034  
EEL10858.1 ---HPKTYVQHHLIKQDRINLISLLDN----G---AHLYICGDGSKMAPDVEDTLCQAYQE 1035  
EEL05393.1 ---YPKTYVQHHLIKQDRINLISLLDN----G---AHLYICGDGSKMAPDVEDTLCQAYQE 1049  
EEK94080.1 ---HPKTYVQHHLIKQDRINLISLLDN----G---AHLYICGDGSKMAPDVEDTLCQAYQE 1038  
EEK99882.1 ---HPKTYVQHVIKEDRIHLISLLDN----G---AHLYICGDGSKMAPDVEDTLCQAYQE 1038  
EEK55784.1 ---HPKTYVQHVIKEDRIHLISLLDN----G---AHLYICGDGSKMAPDVEDTLCQAYQE 1043  
ADK05784.1 ---HPKTYVQHVIKEDRIHLISLLDN----G---AHLYICGDGSKMAPDVEDTLCQAYQE 1035  
AAU17340.1 ---HPKTYVQHVIKQDRIHLISLLDN----G---AHFYICGDGSKMAPDVEDTLCQAYQE 1035  
EEL64394.1 ---HPKTYVQHHLIKQDRINLISLLDN----G---AHLYICGDGSKMAPDVEDTLCQAYQE 1035  
AEW56259.1 ---HPKTYVQHVIKEDRIHLISLLDN----G---AHLYICGDGSKMAPDVEDTLCQAYQE 1035  
AFQ11690.1 ---HPKTYVQHVIKEDRIHLISLLDN----G---AHLYICGDGSKMAPDVEDTLCQAYQE 1035  
EAL16831.1 ---HPKTYVQHVIKEDRIHLISLLDN----G---AHLYICGDGSKMAPDVEDTLCQAYQE 1035  
ACK94296.1 ---HPKTYVQHHLIKQDSINLISLLDN----G---AHLYICGDGSKMAPDVEDTLCQAYQE 1035  
EDZ58760.1 ---HPKTYVQHVIKEDRIHLISLLDN----G---AHLYICGDGSKMAPDVEDTLCQAYQE 1035  
EJV84218.1 ---YPKTYVQHHLIKQDRINLISLLDN----G---AHLYICGDGSKMAPDVEDTLCQAYQE 1035  
EJQ69212.1 ---YPKTYVQHHLIKQDRINLISLLDN----G---AHLYICGDGSKMAPDVEDTLCQAYQE 1035  
EJQ80339.1 ---YPKTYVQHHLIKQDRTNLISLLDN----G---AHLYICGDGSKMAPDVEDTLCQAYQE 1035  
EJV81602.1 ---HPKTYVQHHLIKQDRINLISLLDN----G---AHLYICGDGSKMAPDVEDTLCQAYQE 1035  
EJQ95474.1 ---HPKTYVQHVIKEDRIHLISLLDN----G---AHLYICGDGSKMAPDVEDTLCQAYQE 1035  
EEK44229.1 ---HPKTYVQHVIKEDRIHLISLLDN----G---AHLYICGDGSKMAPDVEDTLCQAYQE 1043  
EEK88560.1 ---HPKTYVQHHLIKQDRMNLISLLDN----G---AHLYICGDGSKMAPDVEDTLCQAYQE 1035  
EJR07451.1 ---HPKTYVQHHLIKQDSINLISLLDN----G---AHLYICGDGSKMAPDVEDTLCQAYQE 1032  
EJR16542.1 ---HPKTYVQHIKEDRIHLISLLDN----G---AHLYICGDGSKMAPDVEDTLCQAYQE 1035  
BAL18840.1 ---HPKTYVQHVIKEDRIHLISLLDN----G---AHLYICGDGSKMAPDVEDTLCQAYQE 1035  
EDX69960.1 ---HPKTYVQHVIKEDRIHLISLLDN----G---AHLYICGDGSKMAPDVEDTLCQAYQE 1035  
ACM13462.1 ---HPKTYVQHVIKEDRIHLISLLDN----G---AHLYICGDGSKMAPDVEDTLCQAYQE 1035  
EEK75631.1 ---HPKTYVQHHLIKQDRINLISLLDN----G---AHLYICGDGSKMAPDVEDTLCQAYQE 1035  
EEL25491.1 ---HPKTYVQHHLIKQDRINLISLLDN----G---AHLYICGDGSKMAPDVEDTLCQAYQE 976  
EEL21990.1 ---HPKTYVQHHLIKQDRINLISLLDN----G---AHLYICGDGSKMAPDVEDTLCQAYEE 1043  
EEL33825.1 ---HPKTYVQHHLIKQNRINLISLLDN----G---AHLYICGDGSKMAPDVEDTLCQAYEE 1043

|                        |                                 |      |                             |      |
|------------------------|---------------------------------|------|-----------------------------|------|
| EEL44933.1             | ---HPKTYVQHVIKEDRIHLISLLDN----  | G--- | AHLYICGDGSKMAPDVEDTLCQAYQE  | 1043 |
| EEL50167.1             | ---HPKTYVQHLMKQDGEKLISLLDN----  | G--- | AHLYICGDGSRMAPDVEDTLCQAYQR  | 1113 |
| EJR22930.1             | ---HPKTYVQHHLIKQDRINLISLLDN---- | G--- | AHLYICGDGSKMAPDVEDTLCQAYQE  | 1035 |
| EJP91231.1             | ---HPKTYVQHHLIKQDSINLISLLDN---- | G--- | AHLYICGDGSKMAPDVEDTLCQAYQE  | 1035 |
| EJR37623.1             | ---HPKTYVQHHLIKQDRINLISLLDN---- | G--- | AHLYICGDGSKMAPDVEDTLCQAYQE  | 1035 |
| EJR50635.1             | ---HPKTYVQHI IKEDRIHLISLLDN---- | G--- | AHLYICGDGSKMAPDVEDTLCQAYQE  | 1035 |
| EJR64551.1             | ---NPKTYVQHHLIKQDRINLISLLDN---- | G--- | AHLYICGDGSKMAPDVEDTLCQAYQE  | 1035 |
| EJR75620.1             | ---HPKTYVQHHLIKQDRSNLISLLDN---- | G--- | AHLYICGDGSKMAPDVEDTLCQAYQE  | 1035 |
| EJR82049.1             | ---HPKTYVQHHLIKQDRINLISLLDN---- | G--- | AHLYICGDGSKMAPDVEDTLCQAYQE  | 1035 |
| EJR83659.1             | ---HPKTYVQHHLIKQDRINLISLLDN---- | G--- | AHLYICGDGSKMAPDVEDTLCQAYQE  | 1035 |
| EJR91135.1             | -----                           |      |                             | 841  |
| EJR97241.1             | ---HPKTYVQHHLIKQDRINLISLLDN---- | G--- | AHLYICGDGSKMAPDVEDTLCQAYQE  | 1035 |
| EJS05852.1             | ---YPKTYVQHHLIKQDRINLISLLDN---- | G--- | AHLYICGDGSKMAPDVEDTLCQAYQE  | 1035 |
| EDX58768.1             | ---HPKTYVQHVIKEDRIHLISLLDN----  | G--- | AHLYICGDGSKMAPDVEDTLCQAYQE  | 1035 |
| AAU24352.1             | ---RPKTYVQDLLREDAALLIHLNE----   | G--- | GRLYVCGDGSRMAPAVEQALCEAYRI  | 1030 |
| ABY44122.1             | ---YPKTYVQHHLIKQDRINLISLLDN---- | G--- | AHLYICGDGSKMAPDVEDTLCQAYQE  | 1035 |
| EDW23201.1             | ---EQKVYVQHLLKEDGGMLIKLLDQ----  | G--- | AYLYVCGDGKVMAPDVEATLIDLYQH  | 1019 |
| ABV62358.1             | ---DQKVYVQHLLKEDGGMLIKLLDE----  | G--- | AYLYVCGDGKVMAPDVESTLIDLYQH  | 1019 |
| EIF12263.1             | ---VPKTYVQHLMKADAGALISILGR----  | G--- | GHLVYVCGDGSKMAPDVETTLQKAYQS | 1030 |
| EIF14027.1             | ---DCKVYVQDVLLREAEQI IALLDQ---- | G--- | GHLVYVCGDGSKMAPAVENVLLQAYEK | 1023 |
| EHL75405.1             | ---HPKTYVQHHLIKQDRINLISLLDN---- | G--- | AHLYICGDGSKMAPDVEDTLCQAYQE  | 1035 |
| EJD67577.1             | ---VPKTYVQHLMKADAGALISILGR----  | G--- | GHLVYVCGDGSKMAPDVEATLQKAYQS | 1030 |
| EJD68347.1             | ---DCKVYVQDVLLREAAQI IALLDQ---- | G--- | GHLVYVCGDGSKMAPAVENVLLQAYEK | 1023 |
| EFV73436.1             | ---RPKTYVQDLLREDAALLIHLNE----   | G--- | GRLYVCGDGSRMAPAVEQALCEAYRI  | 1044 |
| CBY93692.1             | ---HPKTYVQHVIKEDRIHLIALLDN----  | G--- | AHLYICGDGSKMAPDVEDTLCEAYQE  | 1035 |
| AFI27355.1             | ---MPKTYVQHLMMAEHAETLISILDR---- | G--- | GRLYVCGDGSKMAPDVEAALQKAYQS  | 1031 |
| AFI29229.1             | ---ESKGYVQHLLKQDSQKLMTLIEK----  | G--- | AHIYVCGDGSQMAPDVEKTLRWAYEI  | 1024 |
| EIL85422.1             | ---EQKVYVQHFIKNDGAKLIELLDK----  | G--- | AYLYICGDGKVMAPDVEATLIELYQT  | 1019 |
| ADV93500.1             | ---ESKGYVQHLLKQDSQKLMTLIEK----  | G--- | AHIYVCGDGSQMAPDVEKTLRWAYET  | 1024 |
| ADV95715.1             | ---MPKTYVQHLMADQADTLISILDR----  | G--- | GRLYVCGDGSKMAPDVEAALQKAYQA  | 1031 |
| BAI84248.1             | ---MPKTYVQHVMADHAETLISILDR----  | G--- | GRLYVCGDGSKMAPDVEAALQKAYQS  | 1031 |
| EFG90288.1             | ---ESKGYVQHLLKQDTQKLMSLIEK----  | G--- | ASIYVCGDGSQMAPDVENSLRQAYET  | 1024 |
| EFG91781.1             | ---MPKTYVQHLMADHAETLISILDR----  | G--- | GRLYVCGDGSKMAPDVEAGLQKAYQS  | 1031 |
| AEP85668.1             | ---MPKTYVQHLMADHAETLISILDR----  | G--- | GRLYVCGDGSKMAPDVEAGLQKAYQS  | 1031 |
| AEP87558.1             | ---ESKEYVQHLLKQDTQKLMSLIEK----  | G--- | AHIYVCGDGSQMAPDVENTLRQAYEA  | 1024 |
| sp 008336.1 CYPB_BACSU | ---EPKGYVQHLLKQDTQKLMTLIEK----  | G--- | AHIYVCGDGSQMAPDVERTLRLAYEA  | 1024 |
| sp 008394.1 CYPD_BACSU | ---MPKTYVQHLMADQADTLISILDR----  | G--- | GRLYVCGDGSKMAPDVEAALQKAYQA  | 1031 |
| AEP89812.1             | ---MPKTYVQHLMADHAETLISILDR----  | G--- | GRLYVCGDGSKMAPDVEAALQKAYQS  | 1031 |

|            |                                   |      |                             |      |
|------------|-----------------------------------|------|-----------------------------|------|
| AEP91702.1 | ---EPKEYVQHLLKQDTQKLMTLIEK----    | G--- | AHIYVCGDGSQMAPDVEKTLRLAYEA  | 1024 |
| EHA31094.1 | ---ESKGYVQHLLKQDSQKLMTLIEK----    | G--- | AHIYVCGDGSQMAPDVEKTLRWAYET  | 1026 |
| ADH07708.1 | ---HPKTYVQHHLIKQDRINLISLLDN----   | G--- | AHLYICGDGSKMAPDVEDTLCQAYQE  | 1035 |
| EEM28177.1 | ---HPKTYVQHHLIKQDRINLISLLDN----   | G--- | AHLYICGDGSRMAPDVEDTLCQAYQE  | 1035 |
| AFQ14162.1 | ---HPKTYVQHHLIKQDSINLISLLDN----   | G--- | AHLYICGDGSKMAPDVEDTLCQAYQE  | 1035 |
| EEM95517.1 | ---HPKTYVQHHLIKQDRINLISLLDN----   | G--- | AHLYICGDGSKMAPDVEDTLCQAYQE  | 1035 |
| EEN02344.1 | ---HPKTYVQHHLIKQDSINLISLLDN----   | G--- | AHLYICGDGSKMAPDVEDTLCQAYQE  | 1035 |
| AFU13781.1 | ---HPKTYVQHHLIKQDRINLISLLDN----   | G--- | AHLYICGDGSKMAPDVEDTLCQAYEE  | 1043 |
| EEM70897.1 | ---HPKTYVQHVIKEDRIHLISLLDN----    | G--- | AHLYICGDGSKMAPDVEDTLCQAYQE  | 1043 |
| ADY22413.1 | ---HPKTYVQHVIKEDRIHLIALLDN----    | G--- | AHLYICGDGSKMAPDVEDTLCEAYQE  | 1035 |
| EEM82895.1 | ---HPKTYVQHHLIKQDRINLISLLDN----   | G--- | AHLYICGDGSKMAPDVEDTLCQAYQE  | 1035 |
| EEM52818.1 | ---HPKTYVQHHLIKQDRINLISLLDN----   | G--- | AHLYICGDGSKMAPDVEDTLCQAYQE  | 1035 |
| EEM59126.1 | ---HPKTYVQHVIKEDRIHLISLLDN----    | G--- | AHLYICGDGSKMAPDVEDTLCQAYQE  | 1043 |
| EEM47193.1 | ---HPKTYVQHHLIKQDRSNLISLLDN----   | G--- | AHLYICGDGSKMAPDVEDTLCQAYQE  | 976  |
| EEM76899.1 | ---HPKTYVQHVIKEDRIHLISLLDN----    | G--- | AHLYICGDGSKMAPDVEDTLCQAYQE  | 1043 |
| EEM88909.1 | ---HPKTYVQHIIKEDRIHLISLLDN----    | G--- | AHLYICGDGSKMAPDVEDTLCQAYQE  | 1043 |
| EEM38196.1 | ---HPKTYVQHHLIKQDSINLISLLDN----   | G--- | AHLYICGDGSKMAPDVEDTLCQAYQE  | 1035 |
| EEM21858.1 | ---HPKTYVQHVIKEDRIHLISLLDN----    | G--- | AHLYICGDGSKMAPDVEDTLCQAYQE  | 1038 |
| ABK86139.1 | ---HPKTYVQHVIKEDRIHLISLLDN----    | G--- | AHLYICGDGSKMAPDVEDTLCQAYQE  | 1043 |
| EJQ37805.1 | ---HPKTYVQHHLIKQDRINLISLLDN----   | G--- | AHLYICGDGSKMAPDVEDTLCQAYEE  | 1035 |
| CCF04242.1 | ---VPKTYVQHLMKADAGALISILGR----    | G--- | GRLYVCGDGSKMAPDVEATLQKAYQS  | 1030 |
| CCF05972.1 | ---DCKVYVQDVLLREAAQI IALLDQ----   | G--- | GHLYICGDGSKMAPAVENVLLQAYEK  | 1023 |
| ABS73124.1 | ---VPKTYVQHLMKADAGALISILGR----    | G--- | GHLYVCGDGSKMAPDVEATLQKAYQS  | 1030 |
| ABS74786.1 | ---DCKVYVQDVLLREAAQI IALLDQ----   | G--- | GHLYICGDGSKMAPAVENVLLQAYEK  | 1023 |
| EKE46398.1 | ---VPKTYVQHLMKADAGALISILGR----    | G--- | GHLYVCGDGSKMAPDVEATLQKAYQS  | 1030 |
| EKE48022.1 | ---DCKVYVQDVLLREAAQI IALLDQ----   | G--- | GHLYICGDGSKMAPAVENVLLQAYEK  | 1023 |
| CCG48683.1 | ---VPKTYVQHLMKADAGALISILGR----    | G--- | GHLYVCGDGSKMAPDVEATLQKAYQS  | 1030 |
| AFJ60789.1 | ---VPKTYVQHLMKADAGALISILGR----    | G--- | GHLYVCGDGSKMAPDVEATLQKAYQS  | 1037 |
| AFJ62808.1 | ---DCKVYVQDVLLREAAQI IALLDQ----   | G--- | GHLYICGDGSKMAPAVENVLLQAYEK  | 1023 |
| EEK66903.1 | ---YPKTYVQHHLIKQDRINLISLLDN----   | G--- | AHLYICGDGSKMAPDVEDTLCQAYQE  | 1049 |
| EJQ52935.1 | ---YPKTYVQHHLIKQDRINLISLLDN----   | G--- | AHLYICGDGSKMAPDVEDTLCQAYQE  | 1035 |
| EJS69574.1 | ---YPKTYVQHHLIKQDRINLITLLDN----   | G--- | AHLYICGDGSKMAPDVEDTLCQAYQE  | 1035 |
| EJV63294.1 | ---YPKTYVQHHLIKQDRINLITLLDN----   | G--- | AHLYICGDGSKMAPDVEDTLCQAYQE  | 1035 |
| EKF35778.1 | ---EHKVVYVQHLIKKGDKVWVWVLDQ----   | G--- | AYLYICGDGKVMAPDVEAALIDLYMT  | 1019 |
| EGP08506.1 | ---TPKSYVQDLIAAQKDKVWVWVWVLDQ---- | G--- | AI IYVCGDGGKMEPDVKRVLMSIYRE | 1052 |
| BAL78328.1 | ---GPKTYVQHVLAAQKDKVWVWVWVLDQ---- | G--- | AIVYVCGDGGKMEPDVKAALVAIHRE  | 1047 |
| BAC48147.1 | ---GPKTYVQHVLAAQKDKVWVWVWVLDQ---- | G--- | AI IYVCGDGGQMEPDVKAALVAIRHE | 1048 |
| BAL12135.1 | ---GPKTYVQHMLAAQKDRVWVWVWVLDQ---- | G--- | AI IYVCGDGGKMEPDVKAALVAIHRE | 1048 |

|            |                                 |      |                               |      |
|------------|---------------------------------|------|-------------------------------|------|
| CCE00185.1 | ---GPKTYVQHLLAAQRARVWELLEQ----  | S--- | AVIFVCGDGSKMEPDVKATLMQIHRD    | 1051 |
| EIG57609.1 | ---GPKTYVQHVLAAQKDKVWPLIEQ----  | G--- | AMVYVCGDGSKMEPDVKAALVAIHRE    | 1047 |
| EHR02046.1 | ---GPKTYVQHVLAAQKDKVWPLIEQ----  | G--- | AIVYVCGDGSKMEPDVKAALVAIHRE    | 1047 |
| EJN11211.1 | -----                           |      |                               | 670  |
| CCF15606.1 | ---QPKTYVQHLMKQNEQELIRLLDQ----  | G--- | ARLYVCGDGSRMADVEATLISSYQT     | 970  |
| CCF12687.1 | -----                           |      |                               | 898  |
| ABB05850.1 | ---EGARFVQDKVWLERERISALFSQ----  | G--- | ATVFVCGDGKNMAPAVRATLGRIYQE    | 1034 |
| EHP43606.1 | ---PDQRYVQHLLWRDRQAVWAMLRD----  | G--- | ATIYVCGDGRQMAPAVRRTLIEIAAQ    | 1070 |
| ABF10339.1 | ---DAPRYVQDLLWQRREQVWAQVRD----  | G--- | ATIYVCGDGRRMAPAVRQTLIEIGMA    | 1036 |
| CAJ95800.1 | ---GEPRYVQDLLWQRRAADVWARLNQ---- | G--- | AIYVCGDGRHMAPAVRQVLIQIGAE     | 1067 |
| AEI79937.1 | ---GEPRYVQDLLWQRRAADVWARLNQ---- | G--- | AIVYVCGDGRHMAPAVRQVLIQIGAE    | 1067 |
| AFD27790.1 | ---DGVEFVQHRLWQDRADVVARLFRQ---- | G--- | AHLYVCGDGRFMAPAVRETLVRIYQE    | 1029 |
| ABC62112.1 | ---GSRTYVQDLIAREADRVWELIEQ----  | D--- | ARIYVCGDGARMEPDVRKALMAIYAE    | 1041 |
| EAQ27850.1 | ---EGKCYVQDHIADDADAIWEMLEA----  | G--- | GRIYVCGDGARMEPDVRAALAKIHSD    | 1042 |
| EIT84377.1 | ---TDVKYVQHVMTOHAEELLGLLQQ----  | G--- | AKLCVCGDGTHMARDVEATLLSLYET    | 1019 |
| CCG43686.1 | ---KGKVVYQDRLWEDASTVLSLLEN----  | G--- | GCLYICGDGSEMATAVIEKIKSYQH     | 1025 |
| ABX05160.1 | ---GEVSFVQHRLWQERQYVWSLIEQ----  | G--- | AVIACVCGDGRSMAPAVRETLARIYAE   | 1025 |
| BAJ96920.1 | ---AEAKYVQDRLWIDRKEVMDLMNK----  | D--- | ARIYVCGEATKMAPAVRSTFIKIYQE    | 1018 |
| GAB96874.1 | GPEGPMRFVQDRLWADRADVADLVRA----  | G--- | ATLYVCGDGQRMATAVHDTCVRMYAQ    | 1085 |
| EFH80345.1 | ---EQKVVYVQHQLWEQRARVWELLEQ---- | G--- | AIYVCGDASQMAPDVQATFARIYQE     | 1045 |
| EFH88481.1 | ---QPRVYVQDKVLEQQDAIWNQLQQ----  | G--- | AVTYVCGDTTRMVPVAEESYKQIYQA    | 1050 |
| EAW32450.1 | ---HPRHYVQDAIAANANRIWELWTR----  | G--- | ARIYVCGDAQYMLPGVRHALQHIYQD    | 1033 |
| EIZ82104.1 | ---GDVRYVQHRVWRDRADVADLFRA----  | G--- | ATVFVCGDGERMAPAVRATCVRIYQE    | 1035 |
| AEV70722.1 | ---DGVRYVQDRIAADADEVWSLLGD----  |      | PAKDHVYVCGDGAKMAPAIRQAFLDIYCT | 1024 |
| EFC41452.1 | ---NVKYVQDKIMECKEEVAKLLE----    | E--- | AQIYICGEGNHMAPAVKKVLMEIYQQ    | 1049 |
| ACV78954.1 | ---GSGRYVQQAVRDHGADVLDLLDR----  | D--- | AVVYVCGNRHTMAPEVSSTIAALHAD    | 1069 |
| ACV78964.1 | ---EGRRYAQHEMLAHQDEIWDLIGQ----  | G--- | ASIFVCGNARTLAPGVRAALTQISAS    | 1045 |
| ACV81379.1 | ---QQRRYAQHEMLAHADEIWSLLEA----  | G--- | GVVYVCGNARTLAPGVRAALTQIAAD    | 1041 |
| EIZ78677.1 | ---GEVAYVQHRVWQDRTRIADLFRC----  | G--- | ATVFVCGDGERMAPAVRETFVRIYRD    | 1027 |
| EJW15291.1 | ---QPKTYVQHLLIKQQQHEVIGLLDQ---- | G--- | AIFYVCGDGSAMSPDVEATLKQMYQD    | 1031 |
| EJW16173.1 | ---EVKTYVQHLLIAQHAEQIIELLDQ---- | G--- | AHLYICGDGSKMAPDVEATLRQAYQT    | 1031 |
| EHQ58913.1 | ---QPKTYVQHLMQQREMEIIGLLDR----  | G--- | AQFYVCGDGSRMADVEAALRKCYQT     | 1029 |
| EHQ59900.1 | ---KPKTYVQDLIKRDAGKLLDLLNR----  | G--- | AKLYVCGDGSKMAPEVEETFRTAYRE    | 1029 |
| EHB66924.1 | ---VEKCYVQHLMKQDGSLLLSLLEA----  | G--- | AKMYICGDGSRMAPDVEQTLIRSYRD    | 1030 |
| AFH60445.1 | ---QEKTYVQDLMKGDASLLIGLLDR----  | G--- | GKLYICGDGSRMAPDVEATLRRAYSE    | 1029 |
| AEI42011.1 | ---QEKTYVQDLMKGDASLLIGLLDR----  | G--- | GKLYICGDGSRMAPDVEATLRRAYSE    | 1029 |
| ADO57681.1 | ---QPKRYVQHVMNEGADTLIHLLDE----  | G--- | AHLYVCGDGSRMADVENTLCAAYAD     | 1028 |
| EGG32133.1 | ---AEKCYVQHLMKQDGMLLLSLLEG----  | G--- | AQMYICGDGSRMAPEVEQTLIRSYQE    | 1032 |

|            |                                               |                   |                             |      |
|------------|-----------------------------------------------|-------------------|-----------------------------|------|
| EGL17662.1 | ---TPKTYVQHLMKENAAELIALLDK----                | G---              | GRLYVCGDGSRMAPDVVEEQLMEAYAN | 1030 |
| ACX65034.1 | ---AEKCYVQHLMKQDGMLLLSLLEG----                | G---              | AQMYICGDGSRMAPEVEQTLIQSYQE  | 1032 |
| ACT11327.1 | ---GEVTFVQHRVWADRERIKTLFCN----                | G---              | GSLFVCGDGLRMVPEVRDMLLRITYRE | 1030 |
| AEA28016.1 | ---DNRRYVQQAILDEQEDVRLLDQ----                 | G---              | AHVYVCGNANTMAPAVRAALIEVHQG  | 1047 |
| EFP68091.1 | ---HPRRFVQHALWDAREAVWKAFDA----                | G---              | ATLYVCGDGRAMAPAVRDTLIRMHQA  | 1051 |
| EGY61507.1 | ---HPRRFVQHALWDAREAVWKAFDA----                | G---              | ATLYVCGDGRAMAPAVRDTLIRMHQA  | 1051 |
| EIE85788.1 | --KSPIKYVQHQILANAAQVWNMLYPT-                  | DNNTKPAAVYICGSGA- | MSRDVRRTFYNLAVS             | 1179 |
| EIE92534.1 | --KSPIRYVQHQILANAAKIWNLLYPAADDNSRPAAIYICGSGA- | MSRDVRRTFYSMAIS   | 1182                        |      |
| BAE46296.1 | -----                                         |                   |                             | 510  |
| BAH31604.1 | -----                                         |                   |                             | 466  |
| EEN84644.1 | -----                                         |                   |                             | 466  |
| EEN88978.1 | -----                                         |                   |                             | 550  |
| ABG96413.1 | -----                                         |                   |                             | 498  |
| BAH52971.1 | -----                                         |                   |                             | 465  |
| EHI44575.1 | -----                                         |                   |                             | 500  |
| EID73168.1 | -----                                         |                   |                             | 465  |
| EHK83749.1 | -----                                         |                   |                             | 441  |
| EJI96173.1 | -----                                         |                   |                             | 465  |
| ABI79384.1 | -----                                         |                   |                             | 497  |
| CAR47816.1 | -----                                         |                   |                             | 498  |
| AEK26937.1 | -----                                         |                   |                             | 473  |
| ABE39056.1 | ---GPKTYVQHLLIAAQKDRVFTLIEQ----               | G---              | AIYVCGDGGKMEPDVRAALMAIHRE   | 1045 |
| ABD08340.1 | ---GPKTYVQHLLIAAQKDRVFALIEQ----               | G---              | AIVYVCGDGGRMEPDVKAALCAIHRE  | 1042 |
| CAM03474.1 | ---GGQCFVQHRIAAEAGEVWALLES----                | G---              | ARVLVCGDGRHMAPGVREAFRGIYRE  | 1031 |
| EJF54063.1 | --KEGQTYVQHRLWADRDAFWAAWQE----                | G---              | ANIYICGDGEGMAPAVRQCLMDIYQE  | 1038 |
| AFC23737.1 | --KEGQTYVQHRLWADRDAFWAAWEA----                | G---              | AKIYICGDGEGMAPAVRQCLMDIYQE  | 1026 |
| ADG98903.1 | -----                                         |                   |                             | 471  |
| EGI54680.1 | ---NGVAYVQDAIWRDRTEIATLFRA----                | G---              | ARVLLCGDGEHMAPAVRDAFIRIYEA  | 1024 |
| AEW97204.1 | ---GDVRFVQHRIAAEAEDEVWSLLKG----               | G---              | ARVYVCGDGSRMAPGVREAFATALYAS | 1038 |
| CAJ88567.1 | -----                                         |                   |                             | 516  |
| BAC68285.1 | ---HPARFVQDAIVGAADTVWQAIQD----                | G---              | AYVYVCGDGRRMAPAVREALAAIYRK  | 1045 |
| BAC75137.1 | -----                                         |                   |                             | 504  |
| EDY51256.1 | ---DGARYVQHRIAADS AELWDLLRS-----              | G---              | AHIRVCGDGRRMAPAVRDAFRAIHRE  | 1041 |
| EFG07822.1 | ---DGARYVQHRIAADS AELWDLLRS-----              | G---              | AHIRVCGDGRRMAPAVRDAFRAIHRE  | 1073 |
| EHN78335.1 | -----                                         |                   |                             | 525  |
| CAB66201.1 | -----                                         |                   |                             | 527  |
| EGG48117.1 | -----                                         |                   |                             | 517  |
| EFL20831.1 | ---DGARFVQDRIAKESDEVWAALEA----                | G---              | GRVYICGDGRRMAPAVREAFMAIYRK  | 1045 |

|            |                                |      |                            |      |
|------------|--------------------------------|------|----------------------------|------|
| EFL28515.1 | ---DGHRFVQHRIAADAAEIWRLLEA---- | G--- | AAVYVCGDGARMAPGVREAFRSVYAA | 1030 |
| AEY93311.1 | -----                          |      |                            | 542  |
| AEY93321.1 | ---NGAAFVQHRIAAGEVWELLGA----   | G--- | ARVYVCGDGARMAPGVRAAFRTLYRE | 1040 |
| EFD71156.1 | -----                          |      |                            | 529  |
| CBG67789.1 | ---DGVRFVQDRIGKESDEVWAALEA---- | G--- | ARVHVCGDGRRMAPAVREAFRALYRE | 1041 |
| CBG68112.1 | -----                          |      |                            | 513  |
| EFL10082.1 | -----                          |      |                            | 501  |
| EFF88741.1 | ---NGARFVQDRIARESDEVRAALEA---- | G--- | GRVYVCGDGRRMAPAVREAFMAIHRE | 1042 |
| EDY58112.1 | -----                          |      |                            | 506  |
| EFL36674.1 | -----                          |      |                            | 510  |
| EFL36680.1 | -----                          |      |                            | 994  |
| EFE65335.1 | -----                          |      |                            | 526  |
| EGX54696.1 | -----                          |      |                            | 491  |
| ACZ89135.1 | ---GEVTFVQHRVWRERDRVRLFRQ----  | G--- | ATVYVCGDGRHMAPAVRENLVRIYQD | 1027 |
| ABD83817.1 | ---GPKTYVQHLLATQKARVWDLIEQ---- | G--- | AVIFVCGDGSKMEPDVKATLVQIYRD | 1049 |
| ADU39615.1 | ---ERKVYVQDLIREQAAAVWKLLEA---- | G--- | GVIYVCGDGSRMEPDVRRTLTDIARE | 1046 |
| EJL72014.1 | ---ERKVYVQDLIREQAADVWKLLEA---- | G--- | AVVYVCGDGSRMEPDVRRTLSDLARE | 1046 |

|                        |                                            |      |
|------------------------|--------------------------------------------|------|
| sp P14779.2 CPXB_PRIM2 | VHQ-V-----SEADARLWLQQLEE-KGRYAKDVWAG-----  | 1049 |
| ADF40088.1             | VHQ-V-----SEADARLWLQQLEE-KGRYAKDVWAG-----  | 1049 |
| ADE70259.1             | VHQ-V-----SEADARLWLQQLEE-KGRYAKDVWAG-----  | 1049 |
| AEN88827.1             | VHE-V-----SEADARLWLQQLEE-KGRYAKDVWAG-----  | 1049 |
| KFN05180.1             | VHQ-V-----SEADARLWLQQLEE-KGRYAKDVWAG-----  | 1049 |
| ACZ37122.1             | VHQ-V-----SEADARLWLQQLEE-KGRYAKDVWAG-----  | 1049 |
| ADA57055.1             | VYE-V-----SEADARLWLQQLEE-KGRYAKDVWAG-----  | 1049 |
| ADA57058.1             | VHQ-V-----SEADARLWLQQLEE-KGRYAKDVWAG-----  | 1049 |
| ADA57059.1             | VYE-V-----SEADARLWLQQLEE-KGRYAKDVWAG-----  | 1049 |
| ADA57061.1             | VHQ-V-----SEADARLWLQQLEE-KGRYAKDVWAG-----  | 1049 |
| ADA57062.1             | VYE-V-----SEADARLWLQQLEE-KGRYAKDVWAG-----  | 1049 |
| ADA57068.1             | VHQ-V-----SEADARLWLQQLEE-KGRYAKDVWAG-----  | 1049 |
| AAT62301.1             | IHE-V-----SEQEARNWLDRLQE-EGRYGKDVWAGI----- | 1065 |
| AAM54108.1             | -----GAGWLDALR-AGGRYATDVF-----             | 1005 |
| EFQ83738.1             | -----                                      | 505  |
| EFL88452.1             | EKD-V-----SGDEADAWFADMIA-KQDYVMDVWVSN----- | 1066 |
| BAF89518.1             | GA-----VAELE-AGGRYLQDVWASS-----            | 1158 |
| CBI43648.1             | VHN-T-----DSKVSLNWLEQLQA-EGRYAKDVWAGV----- | 1053 |
| AEB22839.1             | AHG-T-----DERQAQEWLLDLQT-KGIYAKDVWAGI----- | 1061 |
| EDT22025.1             | IHE-V-----SEQEARNWLDRLQE-EGRYGKDVWAGI----- | 1065 |
| AFH84458.1             | IHE-V-----SEQEARNWLDRLQE-EGRYGKDVWAGI----- | 1073 |
| ADP31197.1             | VHG-V-----GEQEAQKWLGNLQT-NGMYAKDVWAGI----- | 1061 |
| ACP19384.1             | IHE-V-----SEQEARNWLDRLQE-EGRYGKDVWAGI----- | 1065 |
| ADL27534.1             | -----                                      | 1034 |
| ACO29732.1             | IHQ-A-----SEQEARNWLDRLQD-EGRYGKDVWAGI----- | 1065 |
| EDX65100.1             | IHQ-A-----SEQEARNWLDRLQD-EGRYGKDVWAGI----- | 1065 |
| EEK61456.1             | IHE-V-----SEQEARNWLDRLQE-EGRYGKDVWAGI----- | 1065 |
| EEL16232.1             | IHE-V-----SEQEARNWLDRLQE-EGRYGKDVWAGI----- | 1073 |
| EDZ53094.1             | IHE-V-----SEQEARNWLDRLQE-EGRYGKDVWAGI----- | 1065 |
| EEL81346.1             | -----                                      | 663  |
| EEL87105.1             | IHE-V-----SEQEARNWLDRLQE-EGRYGKDVWAGI----- | 1079 |
| EEL75761.1             | IHE-V-----SEQEARNWLDRLQE-EGRYGKDVWAGI----- | 1006 |
| ACK88541.1             | IHE-V-----SEQEARNWLDRLQE-EGRYGKDVWAGI----- | 1065 |
| EJQ05303.1             | IHE-V-----SEQEARNWLDRLQE-EGRYGKDVWAGI----- | 1065 |
| EEK50040.1             | IHE-V-----SEQEARNWLDRLQE-EGRYGKDVWAGI----- | 1065 |
| AAS42149.1             | IHE-V-----SEQEARNWLDRLQE-EGRYGKDVWAGI----- | 1065 |
| AAP10153.1             | IHE-V-----SEQEARNWLDRLQE-EGRYGKDVWAGI----- | 1065 |
| EEK83466.1             | IHE-V-----SEQEARNWLDRLQE-EGRYGKDVWAGI----- | 1073 |

|            |                                             |      |
|------------|---------------------------------------------|------|
| ACK63698.1 | IHE-V-----SEQEARNWLDREVQD-EGRYGKDVWAGI----- | 1006 |
| EJS57156.1 | IHE-V-----SEQEARNWLDREVQD-EGRYGKDVWAGI----- | 1065 |
| EJS56605.1 | IHE-V-----SEQEARNWLDREVQD-EGRYGKDVWAGI----- | 1065 |
| EJS68951.1 | NHG-V-----SEQEARNWLDQLQR-EGRYGKDVWAGI-----  | 1064 |
| EJQ10567.1 | IHE-V-----SEQEARNWLDREVQD-EGRYGKDVWAGI----- | 1065 |
| EJQ13433.1 | IHE-V-----SEQEARDWLERVQD-EGRYGKDVWAGI-----  | 1065 |
| EJQ20399.1 | IHE-V-----SEQEARNWLDREVQD-EGRYGKDVWAGI----- | 1065 |
| EJQ30236.1 | IHE-V-----SEQEARNWLDREVQD-EGRYGKDVWAGI----- | 1065 |
| EJQ51278.1 | NHG-V-----SEQEARNWLDQLQR-EGRYGKDVWAGI-----  | 1064 |
| EEL10858.1 | IHE-V-----SEQEARNWLDREVQD-EGRYGKDVWAGI----- | 1065 |
| EEL05393.1 | IHE-V-----SEQEARNWLDREVQE-EGRYGKDVWAGI----- | 1079 |
| EEK94080.1 | IHE-V-----SEQEARNWLDREVQD-EGRYGKDVWAGI----- | 1068 |
| EEK99882.1 | IHE-V-----SEQEARNWLDRLQD-EGRYGKDVWAGI-----  | 1068 |
| EEK55784.1 | IHQ-A-----SEQEARNWLDRLQD-EGRYGKDVWAGI-----  | 1073 |
| ADK05784.1 | IHQ-A-----SEQEARNWLDRLQE-EGRYGKDVWAGI-----  | 1065 |
| AAU17340.1 | IHE-V-----SEQEARNWLDRLQE-EGRYGKDVWAGI-----  | 1065 |
| EEL64394.1 | IHE-V-----SEQEARNWLDREVQD-EGRYGKDVWAGI----- | 1065 |
| AEW56259.1 | IHQ-A-----SEQEARNWLDRLQD-EGRYGKDVWAGI-----  | 1065 |
| AFQ11690.1 | IHE-V-----SEQEARNWLDRLQD-EGRYGKDVWAGI-----  | 1065 |
| EAL16831.1 | IHE-V-----SEQEARNWLDREVQD-EGRYGKDVWAGI----- | 1065 |
| ACK94296.1 | IHE-V-----SEQEARNWLDREVQD-EGRYGKDVWAGI----- | 1065 |
| EDZ58760.1 | IHE-V-----SEQEARNWLDRLQD-EGRYGKDVWAGI-----  | 1065 |
| EJV84218.1 | IHE-V-----SEQEARNWLDREVQD-EGRYGKDVWAGI----- | 1065 |
| EJQ69212.1 | IHE-V-----SEQEARNWLDREVQE-EGRYGKDVWAGI----- | 1065 |
| EJQ80339.1 | IHE-V-----SEKEARNWLDHLQH-EGRYGKDVWTGI-----  | 1065 |
| EJV81602.1 | IHE-V-----SEQEARNWLDREVQD-EGRYGKDVWAGI----- | 1065 |
| EJQ95474.1 | IHQ-A-----SEQEARNWLDRLQE-EGRYGKDVWAGI-----  | 1065 |
| EEK44229.1 | IHE-V-----SEQEARNWLDRLQD-EGRYGKDVWAGI-----  | 1073 |
| EEK88560.1 | IHE-V-----SEQEARNWLDREVQD-EGRYGKDVWAGI----- | 1065 |
| EJR07451.1 | IHE-V-----SEQEARNWLDREVQD-EGRYGKDVWAGI----- | 1062 |
| EJR16542.1 | FHE-V-----SEQEARNWLDRLQD-EGRYGKDVWAGI-----  | 1065 |
| BAL18840.1 | IHE-V-----SEQEARNWLDRLQD-EGRYGKDVWAGI-----  | 1065 |
| EDX69960.1 | IHE-V-----SEQEARNWLDRLQE-EGRYGKDVWAGI-----  | 1065 |
| ACM13462.1 | IHE-V-----SEQEARNWLDRLQD-EGRYGKDVWAGI-----  | 1065 |
| EEK75631.1 | IHE-V-----SEQEARNWLERVQD-EGRYGKDVWAGI-----  | 1065 |
| EEL25491.1 | IHE-V-----SEQEARNWLNREVQD-EGRYGKDVWAGI----- | 1006 |
| EEL21990.1 | IHE-V-----SEQEARNWLDYQLQH-EGRYGKDVWTGI----- | 1073 |
| EEL33825.1 | IHE-V-----SEQEARNWLDHLQH-EGRYGKDVWTGI-----  | 1073 |

|                        |                                                     |      |
|------------------------|-----------------------------------------------------|------|
| EEL44933.1             | IHE-V-----SEQEARNWLDRLQE-EGRYGKDVWAGI-----          | 1073 |
| EEL50167.1             | NHG-I-----SEQEAKSWLDQLQR-EGRYGKDVWAGI-----          | 1143 |
| EJR22930.1             | IHE-V-----SEQEARNWLDREVQD-EGRYGKDVWAGI-----         | 1065 |
| EJP91231.1             | IHE-V-----SEQEARNWLDREVQD-EGRYGKDVWAGI-----         | 1065 |
| EJR37623.1             | IHE-V-----SEQEARNWLDREVQD-EGRYGKDVWAGI-----         | 1065 |
| EJR50635.1             | IHE-V-----SEQEARNWLDREVQD-EGRYGKDVWAGI-----         | 1065 |
| EJR64551.1             | IHE-V-----SEQEARNWLDHLQH-EGRYGKDVWTGI-----          | 1065 |
| EJR75620.1             | IHE-V-----SEQEARNWLDREVQD-EGRYGKDVWAGI-----         | 1065 |
| EJR82049.1             | IHE-V-----SEQEARNWLDREVQD-EGRYGKDVWAGI-----         | 1065 |
| EJR83659.1             | IHE-V-----SEQEARNWLNREVQD-EGRYGKDVWAGI-----         | 1065 |
| EJR91135.1             | -----                                               | 841  |
| EJR97241.1             | IHE-V-----SEQEARNWLDREVQD-EGRYGKDVWAGI-----         | 1065 |
| EJS05852.1             | IHE-V-----SEQEARNWLERVQD-EGRYGKDVWAGI-----          | 1065 |
| EDX58768.1             | IHE-V-----SEQEARNWLDREVQE-EGRYGKDVWAGI-----         | 1065 |
| AAU24352.1             | VQG-A-----SREESQSWLSALLE-EGRYAKDVWDGGVSOHNVKADCIART | 1074 |
| ABY44122.1             | IHE-V-----SEQEARNWLDREVQE-EGRYGKDVWAGI-----         | 1065 |
| EDW23201.1             | EKQ-C-----SKEAAENWLTTLAN-NNRYVKDVWS-----            | 1047 |
| ABV62358.1             | EKQ-C-----SKEDAENWLTTLAN-NNRYVKDVWS-----            | 1047 |
| EIF12263.1             | VHE-T-----DERQAQEWLLDLQT-KGIYAKDVWAGI-----          | 1060 |
| EIF14027.1             | VHN-I-----DSKVSLEWLEQLQA-EGRYAKDVWAGM-----          | 1053 |
| EHL75405.1             | IHE-V-----SEQEARNWLDREVQD-EGRYGKDVWAGI-----         | 1065 |
| EJD67577.1             | VHE-T-----DERQAQEWLLDLQT-KGIYAKDVWAGI-----          | 1060 |
| EJD68347.1             | VHN-T-----DSKVSLEWLEQLQA-EGRYAKDVWAGM-----          | 1053 |
| EFV73436.1             | VQG-A-----SREESQSWLSALLE-EGRYAKDVWDGGVSOHNVKADCIART | 1088 |
| CBY93692.1             | IHE-V-----SEQEARNWLERVQD-EGRYGKDVWAGI-----          | 1065 |
| AFI27355.1             | VHG-T-----GEQEAQNWLRHLQD-TGMYAKDVWAGI-----          | 1061 |
| AFI29229.1             | EKG-A-----SQEESADWLQKLQD-QKRYVKDVWTGN-----          | 1054 |
| EIL85422.1             | EKQ-C-----AKETAEQWLTSLAN-DNRYVKDVWS-----            | 1047 |
| ADV93500.1             | EKG-A-----SQEESADWLQKLQD-QKRYIKDVWTGN-----          | 1054 |
| ADV95715.1             | VHG-T-----GEQEAQNWLRHLQD-TGMYAKDVWAGI-----          | 1061 |
| BAI84248.1             | VHG-T-----GEQEAQNWLRHLQD-TGMYAKDVWAGI-----          | 1061 |
| EFG90288.1             | EKG-A-----SEESADWLQKLQD-QKRYVKDVWTGM-----           | 1054 |
| EFG91781.1             | VHG-T-----GEEEAQNWLKHLQD-TGIYAKDVWSGV-----          | 1061 |
| AEP85668.1             | VHG-T-----GEQEAQNWLKHLQD-TGIYAKDVWSGI-----          | 1061 |
| AEP87558.1             | EKG-A-----SQEESADWLEKLQD-QKRYVKDVWTGM-----          | 1054 |
| sp 008336.1 CYPB_BACSU | EKA-A-----SQEESAVWLQKLQD-QRRYVKDVWTGM-----          | 1054 |
| sp 008394.1 CYPD_BACSU | VHG-T-----GEQEAQNWLRHLQD-TGMYAKDVWAGI-----          | 1061 |
| AEP89812.1             | VHG-T-----GEQEAQNWLRHLQD-TGMYAKDVWAGI-----          | 1061 |

|            |                                             |      |
|------------|---------------------------------------------|------|
| AEP91702.1 | EKG-A-----SQEESAEWLQKLQD-QRRYVKDVWTGM-----  | 1054 |
| EHA31094.1 | EKG-A-----SQEESADWLQKLQD-QKRYIKDVWTGN-----  | 1056 |
| ADH07708.1 | IHE-V-----SEQEARNWLDREVQD-EGRYGKDVWAGI----- | 1065 |
| EEM28177.1 | IHE-V-----SEQEARNWLDREVQD-EGRYGKDVWAGI----- | 1065 |
| AFQ14162.1 | IHE-V-----SEQEARNWLDREVQD-EGRYGKDVWAGI----- | 1065 |
| EEM95517.1 | IHE-V-----SEQEARNWLDREVQD-EGRYGKDVWAGI----- | 1065 |
| EEN02344.1 | IHE-V-----SEQEARNWLDREVQD-EGRYGKDVWAGI----- | 1065 |
| AFU13781.1 | IHE-V-----SEQEARNWLDHLQH-EGRYGKDVWTGI-----  | 1073 |
| EEM70897.1 | IHE-V-----SEQEARNWLDREVQD-EGRYGKDVWAGI----- | 1073 |
| ADY22413.1 | IHE-V-----SEQEARNWLERVQD-EGRYGKDVWAGI-----  | 1065 |
| EEM82895.1 | IHE-V-----SEQEARNWLDREVQD-EGRYGKDVWAGI----- | 1065 |
| EEM52818.1 | IHE-V-----SEQEARNWLDREVQD-EGRYGKDVWAGI----- | 1065 |
| EEM59126.1 | IHE-V-----SEQEARNWLDREVQE-EGRYGKDVWAGI----- | 1073 |
| EEM47193.1 | IHE-V-----SEQEARNWLDREVQD-EGRYGKDVWAGI----- | 1006 |
| EEM76899.1 | IHE-V-----SEQEARNWLDREVQE-EGRYGKDVWAGI----- | 1073 |
| EEM88909.1 | IHQ-A-----SEQEARNWLDRLQD-EGRYGKDVWAGI-----  | 1073 |
| EEM38196.1 | IHE-V-----SEQEARNWLDREVQD-EGRYGKDVWAGI----- | 1065 |
| EEM21858.1 | IHE-V-----SEQEARNWLDRLQD-EGRYGKDVWAGI-----  | 1068 |
| ABK86139.1 | IHQ-A-----SEQEARNWLDRLQD-EGRYGKDVWAGI-----  | 1073 |
| EJQ37805.1 | IHE-V-----SEQEARNWLDYLQH-EGRYGKDVWTGI-----  | 1065 |
| CCF04242.1 | VRE-T-----DERQAQEWLLDLQT-KGIYAKDVWAGI-----  | 1060 |
| CCF05972.1 | VHN-T-----DSKVSSNWLEQLQA-EGRYAKDVWAGV-----  | 1053 |
| ABS73124.1 | VRE-T-----DERQAQEWLLDLQT-KGIYAKDVWAGI-----  | 1060 |
| ABS74786.1 | VHN-T-----DSKVSLNWLEQLQA-EGRYAKDVWAGM-----  | 1053 |
| EKE46398.1 | VRE-T-----DERQAQEWLLDLQT-KGIYAKDVWAGI-----  | 1060 |
| EKE48022.1 | VHN-T-----DSKVSSNWLEQLQA-EGRYAKDVWAGV-----  | 1053 |
| CCG48683.1 | VHE-T-----DERQAQEWLLDLQT-KGIYAKDVWAGI-----  | 1060 |
| AFJ60789.1 | VHE-T-----DERQAQEWLLDLQT-KGIYAKDVWAGI-----  | 1067 |
| AFJ62808.1 | VHN-T-----DSKVSLNWLEQLQA-EGRYAKDVWAGM-----  | 1053 |
| EEK66903.1 | IHE-V-----SEQEARNWLDREVQD-EGRYGKDVWAGI----- | 1079 |
| EJQ52935.1 | IHE-V-----SEQEARNWLDREVQD-EGRYGKDVWAGI----- | 1065 |
| EJS69574.1 | IHE-V-----SEQEARNWLDREVQD-EGRYGKDVWAGI----- | 1065 |
| EJV63294.1 | IHE-V-----SEQEARNWLDREVQD-EGRYGKDVWAGI----- | 1065 |
| EKF35778.1 | VKQ-C-----EKDTAEQWLTSLEK-DNRYVKDVWS-----    | 1047 |
| EGP08506.1 | KTG-A-----DEAAAAAWIDSMGT-QNRYVLDVWAGS-----  | 1082 |
| BAL78328.1 | KSG-S-----DAVASARWIEEMGA-KNRYVLDVWAGG-----  | 1077 |
| BAC48147.1 | KSG-S-----DTATAARWIEEMGA-TNRYVLDVWAGG-----  | 1078 |
| BAL12135.1 | KSG-S-----DAAAAARWIEEMGA-KNRYVLDVWAGG-----  | 1078 |

|            |                                              |      |
|------------|----------------------------------------------|------|
| CCE00185.1 | CTG-S-----DAEAAANWIADLGA-TNRYVLDVWAGG-----   | 1081 |
| EIG57609.1 | KSG-S-----DAATAARWIEEMGA-KNRYVLDVWAGG-----   | 1077 |
| EHR02046.1 | KSG-G-----DAATAARWIEEMGA-KNRYVLDVWAGG-----   | 1077 |
| EJN11211.1 | -----                                        | 670  |
| CCF15606.1 | IHS-V-----SKEEAQAWLDKLR-DEQYVKDVWTGA-----    | 1000 |
| CCF12687.1 | -----                                        | 898  |
| ABB05850.1 | TTG-E-----NDESASAWIDTMEREHGRYVADVFA-----     | 1063 |
| EHP43606.1 | QGG-M-----SEAAASDWLAGMVA-RGHYRQDVFN-----     | 1098 |
| ABF10339.1 | QGG-M-----TDKAASDWFGGLVA-QGRYRQDVFN-----     | 1064 |
| CAJ95800.1 | QGG-M-----TPEAASDWLADLVS-AGRYRQDVFN-----     | 1095 |
| AEI79937.1 | QGG-M-----TPEAASDWLAELVS-TGRYRQDVFN-----     | 1095 |
| AFD27790.1 | ETG-V-----TEADAQAWAEAFGRDSGRYAADVFA-----     | 1058 |
| ABC62112.1 | KKS-S-----DEASAKAWIDDLVA-QDRYLLDVWVG-----    | 1070 |
| EAQ27850.1 | KTG-S-----TPAEAQSWVGD LIT-NERYSLDVWVG-----   | 1071 |
| EIT84377.1 | QYQ-T-----SHEEAQQWLTSLQQ-AERYVKDVWSN-----    | 1048 |
| CCG43686.1 | KYE-T-----TYEKAVEWLENLEL-EGRLAKDVWAGA-----   | 1055 |
| ABX05160.1 | ATG-S-----EQTAGMAWIAEIEQ-AGRYVADVFG-----     | 1053 |
| BAJ96920.1 | QSK-C-----TDEEGEEMNLERLSVRYVSDVFT-----       | 1047 |
| GAB96874.1 | ATG-A-----SEQDAVAWVEQQEREHGRYVSDVFA-----     | 1114 |
| EFH80345.1 | QTG-K-----DASEAQQWHQVLVD-RNRYLVDVWGN-----    | 1074 |
| EFH88481.1 | KTG-K-----SSQEADQWLQEMST-QNRYLVDIWGTS-----   | 1080 |
| EAW32450.1 | AYK-KEGETISDKQAQVWLQEMEV-AGRFLVDAWA-----     | 1066 |
| EIZ82104.1 | ARA-V-----TPEEAEAWADTVERETGRYVADVFA-----     | 1064 |
| AEV70722.1 | RTG-S-----DESRARDWLI GLVE-SDRYVEDVWAG-----   | 1053 |
| EFC41452.1 | VTN-C-----TKEEA EKRMSSM---DKRFAVDVFA-----    | 1075 |
| ACV78954.1 | RTG-----EAGEPWISELAA-AGRYVEDNWGAG-----       | 1096 |
| ACV78964.1 | KTG-Q-----SADDADTWLAGLRS-EKRFL EDIWGAG-----  | 1075 |
| ACV81379.1 | KLK-L-----GGAAAEDWLTDLRR-QHRYLEDIWGAR-----   | 1071 |
| EIZ78677.1 | AMQ-V-----SDDAANAWADQIEREHGRYVADVFA-----     | 1056 |
| EJW15291.1 | VHG-V-----GETKANRWLEQLGA-DGRYVKDVWAGRKA----- | 1063 |
| EJW16173.1 | VHR-V-----HEQEAKQWLERLQA-EGKFAKDVWSGL-----   | 1061 |
| EHQ58913.1 | VHG-V-----SEAEAVAWLSRLEA-EGRYVKDVWAGGKA----- | 1061 |
| EHQ59900.1 | AHG-T-----TEESAQNWLES LQN-DGQYVKDVWAGL-----  | 1059 |
| EHB66924.1 | QHG-V-----SEEEAAVWLSGLES-SGRYVKDVWAG-----    | 1059 |
| AFH60445.1 | IHG-V-----SGQEADWLDGLAR-ENRYAKDVWAGTAG-----  | 1061 |
| AEI42011.1 | IHG-V-----SGQEADWLDGLAR-ENRYAKDVWAGTAG-----  | 1061 |
| ADO57681.1 | IHH-T-----SKEEAQQWLDHLQQ-EKRYAKDVWTGI-----   | 1058 |
| EGG32133.1 | RHG-V-----NAEDAAAWLSGLES-SGQYVKDVWAG-----    | 1061 |

|            |                                               |      |
|------------|-----------------------------------------------|------|
| EGL17662.1 | IHQ-V-----SPDEARKWLDGLQT-DGRYAKDVWAGI-----    | 1060 |
| ACX65034.1 | RHG-V-----NAEDAAAWLSGLES-TGQYVKDVWAG-----     | 1061 |
| ACT11327.1 | ATG-S-----NETDAMLWADKLEREQGRYVDMFI-----       | 1059 |
| AEA28016.1 | GDG-T-----ADTDGDAWLAGLRA-AQRYLEDIWGESAVG----- | 1080 |
| EFP68091.1 | RHG-S-----DLPTASDWLTAQMQ-SGRYRQDVFN-----      | 1079 |
| EGY61507.1 | RHG-S-----DLPTASDWLTAQMQ-SGRYRQDVFN-----      | 1079 |
| EIE85788.1 | FGVAA-----TEEEAEALILKLID-EKRYNEDVWG-----      | 1208 |
| EIE92534.1 | FGAAT-----NDKEAEALIKLMD-EKRYNEDVWG-----       | 1211 |
| BAE46296.1 | -----                                         | 510  |
| BAH31604.1 | -----                                         | 466  |
| EEN84644.1 | -----                                         | 466  |
| EEN88978.1 | -----                                         | 550  |
| ABG96413.1 | -----                                         | 498  |
| BAH52971.1 | -----                                         | 465  |
| EHI44575.1 | -----                                         | 500  |
| EID73168.1 | -----                                         | 465  |
| EHK83749.1 | -----                                         | 441  |
| EJI96173.1 | -----                                         | 465  |
| ABI79384.1 | -----                                         | 497  |
| CAR47816.1 | -----                                         | 498  |
| AEK26937.1 | -----                                         | 473  |
| ABE39056.1 | RSG-A-----DAAAASWIDDLGA-CNRYVLDVWASA-----     | 1075 |
| ABD08340.1 | RSG-A-----DATAAAWIADLGA-RDRYVLDVWASV-----     | 1072 |
| CAM03474.1 | RTPGA-----DDASAHEWLQAMIA-GGCYVEDVYAG-----     | 1061 |
| EJF54063.1 | KAQ-A-----TEAQALDWLMQIAGKDKRYFTDIFS-----      | 1067 |
| AFC23737.1 | KAQ-A-----TEAQALDWLMQIAGKDKRYFTDIFS-----      | 1055 |
| ADG98903.1 | -----                                         | 471  |
| EGI54680.1 | ETD-T-----SHAEALAWAERI EREGVRYVADIYA-----     | 1053 |
| AEW97204.1 | RTG-A-----TAEQAAGWLADLVA-RGRYVEDVYAAG-----    | 1068 |
| CAJ88567.1 | -----                                         | 516  |
| BAC68285.1 | HTG-S-----DDEAAQQWLAQLEA-DERYQQDVFA-----      | 1073 |
| BAC75137.1 | -----                                         | 504  |
| EDY51256.1 | HTG-G-----DEESADAWLSALMA-EDRYVEDVWAG-----     | 1070 |
| EFG07822.1 | HTG-G-----DEESADAWLSALMA-EDRYVEDVWAG-----     | 1102 |
| EHN78335.1 | -----                                         | 525  |
| CAB66201.1 | -----                                         | 527  |
| EGG48117.1 | -----                                         | 517  |
| EFL20831.1 | YTG-A-----DDEEAAAWLAVLIE-SGTYVEDVWAG-----     | 1074 |

|            |                                            |      |
|------------|--------------------------------------------|------|
| EFL28515.1 | HTPGA-----DDAAAQRWLDALMA-EGRFVEDVYAG-----  | 1060 |
| AEY93311.1 | -----                                      | 542  |
| AEY93321.1 | RTPGA-----DEAAADRWLDTLVA-DGRYVEDVYAAG----- | 1071 |
| EFD71156.1 | -----                                      | 529  |
| CBG67789.1 | NTG-A-----DDAEATAWLDALTE-SGHYVEDVWAG-----  | 1070 |
| CBG68112.1 | -----                                      | 513  |
| EFL10082.1 | -----                                      | 501  |
| EFF88741.1 | HTG-A-----GDEEAAAWLTGMIE-SGRYNEDVWAG-----  | 1071 |
| EDY58112.1 | -----                                      | 506  |
| EFL36674.1 | -----                                      | 510  |
| EFL36680.1 | -----                                      | 994  |
| EFE65335.1 | -----                                      | 526  |
| EGX54696.1 | -----                                      | 491  |
| ACZ89135.1 | ATG-S-----TGEDATAWAAEVER-NGRYVSDVFG-----   | 1055 |
| ABD83817.1 | CTG-A-----DANGGAKWIADLGA-QNRYVLDVWAGG----- | 1079 |
| ADU39615.1 | HG-----HDSNAWMDKMIA-DQRYVLDVWAGT-----      | 1072 |
| EJL72014.1 | HG-----HDSKAWMDKMIA-DQRYVLDVWAGS-----      | 1072 |
